# Supplementary material for: Young genes have distinct gene structure, epigenetic profiles, and transcriptional regulation
Source: PubMed Central journal article supplement — Genome Res. 2018 Nov;28(11):1675–87. doi: 10.1101/gr.234872.118 (PMC6211652; doi:10.1101/gr.234872.118), 2018-11
Supplement: supp_gr.234872.118_Supplemental_Fig_S4.pdf [file supp_gr.234872.118_Supplemental_Fig_S4.pdf]

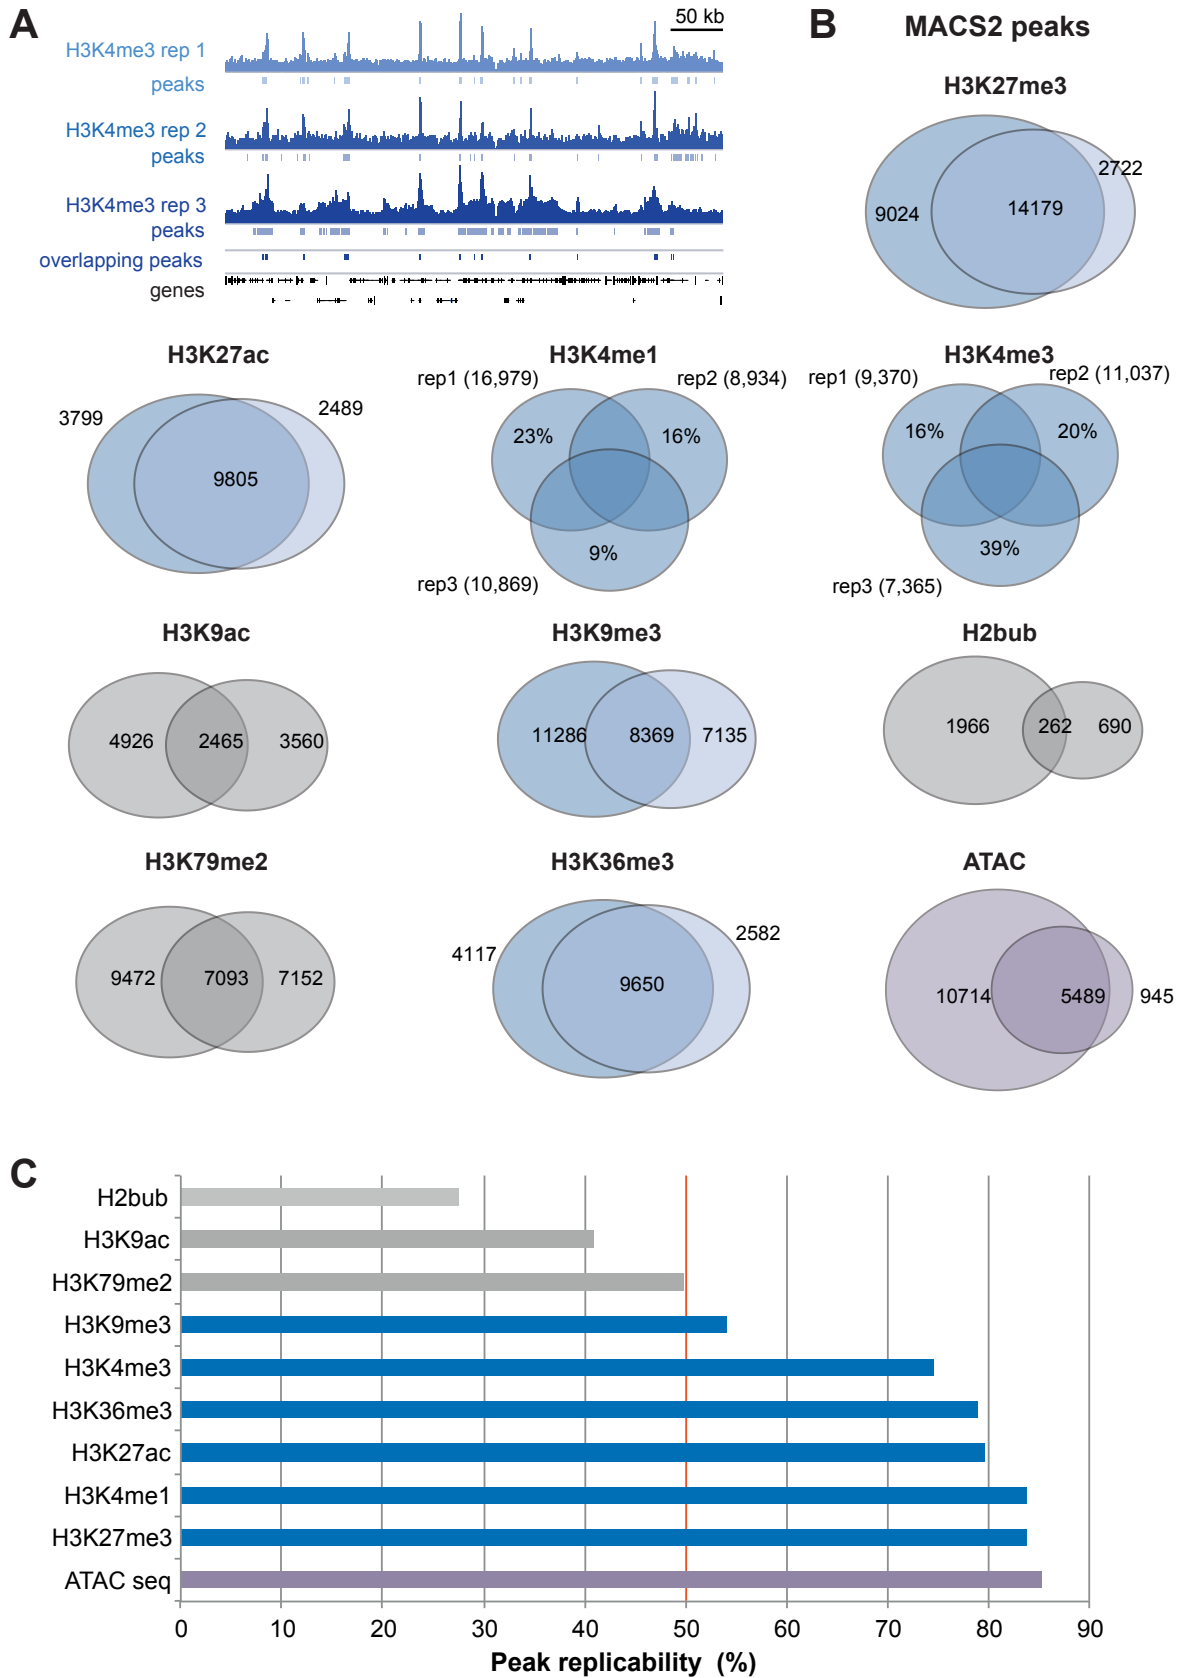

**Supplemental Figure S4. ChIP-, ATAC-, and RNA-seq peak overlaps between replicates.** (A) Ex. of H3K4me3 replicate coverage over a defined interval in Integrated Genome Viewer (IGV). (B) Overlap of MACS2 peaks between biological replicates of ChIP-, ATAC-, and RNA-seq. Venn diagrams produced in R. Only peaks detected in both data sets are reported in Supplemental Table S1. Peak replicability = percent overlap of merged overlapping peaks relative to the smaller data set for samples with two replicates, or average overlap with at least one other replicate for samples with three replicates. H2bub, H3K9ac, and H3K79me2 fall below a 50% threshold, and were excluded from further analysis.
