# Supplementary material for: Young genes have distinct gene structure, epigenetic profiles, and transcriptional regulation
Source: PubMed Central journal article supplement — Genome Res. 2018 Nov;28(11):1675–87. doi: 10.1101/gr.234872.118 (PMC6211652; doi:10.1101/gr.234872.118), 2018-11
Supplement: supp_gr.234872.118_Supplemental_Fig_S5.pdf [file supp_gr.234872.118_Supplemental_Fig_S5.pdf]

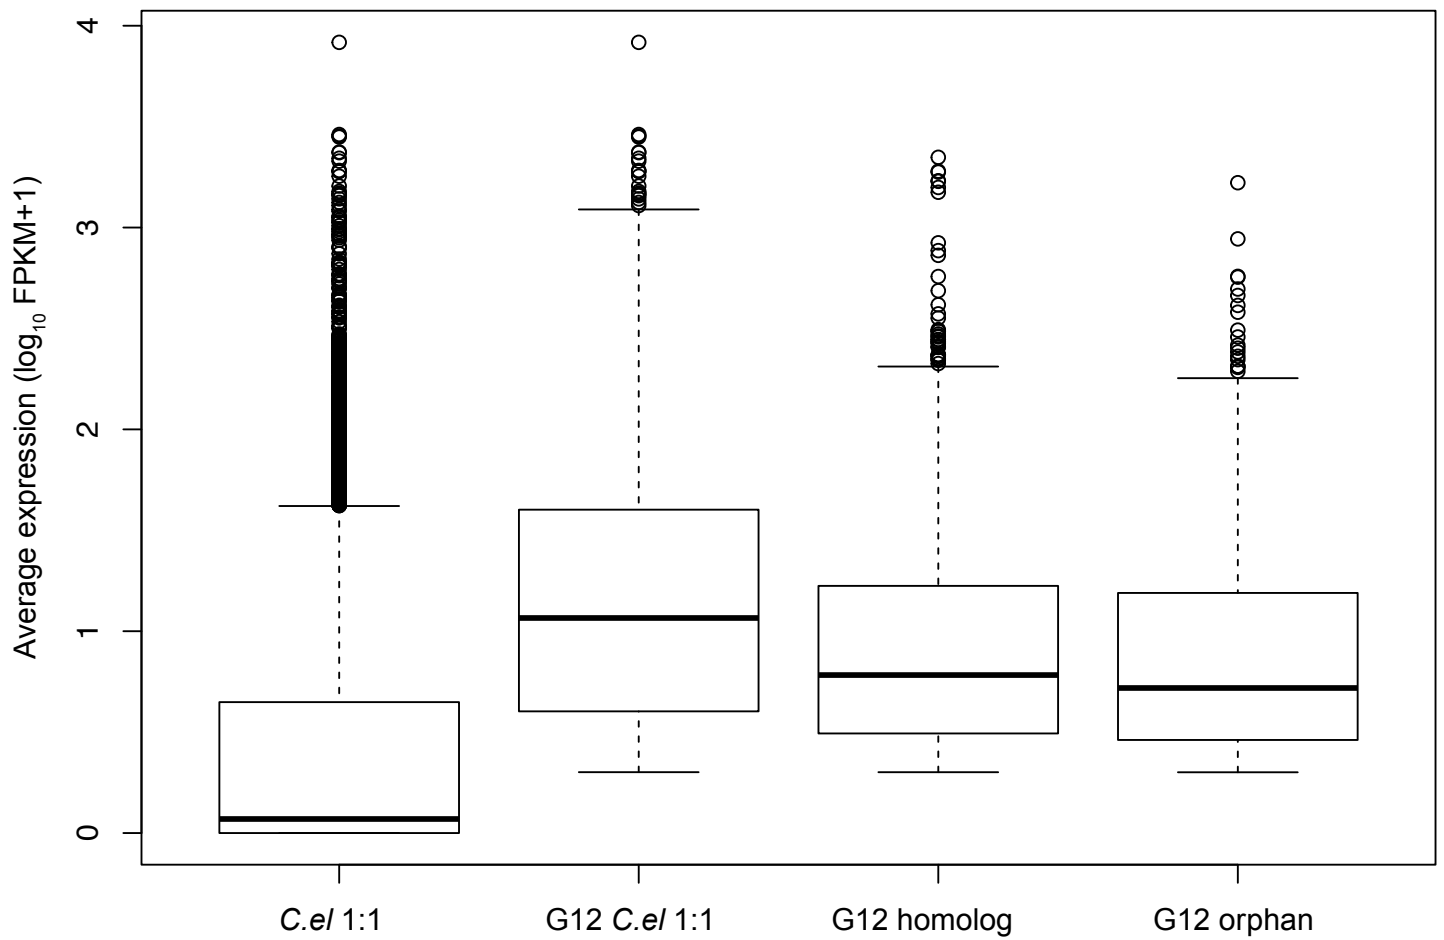

**Supplemental Figure S5. Expression of group 1 and 2 genes are similar between different evolutionary gene classes, and higher than overall *C. elegans* 1:1 orthologs.** Average FPKM of genes within group 1 and 2 for each evolutionary gene category. Importantly, genes in orphan and homolog groups 1 and 2 are higher than overall *C. elegans* 1:1 orthologs, despite a substantial difference in chromatin states, and overall *C. elegans* 1:1 orthologs exhibit similar chromatin state patterns to group 1 and 2 *C. elegans* 1:1 orthologs (Fig. 4C,G).
