# Supplementary material for: Young genes have distinct gene structure, epigenetic profiles, and transcriptional regulation
Source: PubMed Central journal article supplement — Genome Res. 2018 Nov;28(11):1675–87. doi: 10.1101/gr.234872.118 (PMC6211652; doi:10.1101/gr.234872.118), 2018-11
Supplement: supp_gr.234872.118_Supplemental_Methods.pdf [file supp_gr.234872.118_Supplemental_Methods.pdf]

1  
2  
3  
4  
5  
6  
7  
8  
9  
10  
11  
12  
13  
14  
15  
16  
17  
18  
19  
20  
21  
22

## Supplemental Methods

Young genes have distinct gene structure, epigenetic profiles, and  
transcriptional regulation

Michael S. Werner<sup>1</sup>, Bogdan Sieriebriennikov<sup>1</sup>, Neel Prabh<sup>1</sup>, Tobias Loschko<sup>1</sup>, Christa Lanz<sup>1</sup> and  
Ralf J. Sommer<sup>1</sup>

## 23 **Nematode synchronization and growth for ChIP-, ATAC-, and RNA-seq**

24 *P. pacificus* were grown for three healthy generations on OP50 bacteria. Then, to increase  
25 homozygosity, a single worm was passaged to 10 x 10 cm plates. After 5 days, 15-20 worms  
26 were split to 100 x 10 cm plates spotted with 700  $\mu$ l OP50 and grown 5-6 days (at 7 days the  
27 presence of too many late stage J1s that are still resistant to bleach prevents consistent  
28 synchronization). Worms were washed with water into 50 ml conical tubes, and bleach-treated  
29 (10 minutes, 30% NaOH/bleach)(Stiernagle 2006) to isolate eggs and J1 larva. Eggs-J1 were  
30 then filtered through a 140  $\mu$ M nylon net (Millipore) to remove carcasses, then centrifuged 500 x  
31 g, 1 minute to pellet. The pellet was washed by removing supernatant with a pipette and re-  
32 suspending in 3 ml M9, then re-centrifuged 500 x g, 30-60 seconds. Supernatant was removed,  
33 and the egg-J1 pellet was re-suspended in 100  $\mu$ l M9 buffer x the number of plates grown (i.e.  
34 20 ml for 200 plates). Eggs-J1 were added drop-wise to new 10 cm agar plates (100  $\mu$ l each)  
35 spotted with 700  $\mu$ l OP50 and grown to young adults (approximately 64 hours).

36

## 37 **ChIP-seq**

38 Most antibodies used conformed to the ChIP-Seq guidelines outlined by  
39 ENCODE/modENCODE (Landt et al. 2012). Specifically, we applied three levels of quality  
40 control: (1) immunoblot specificity (primary evidence) from previous work in the lab (Seroby  
41 et al. 2016) or the manufacturer (Diagenode or abcam), except for H3K9ac and H3K36me3, (2)  
42 expected annotation enrichment (i.e. H3K4me3/H3K27ac overlap with each other and at  
43 promoters), and (3) independent biological replication of each antibody (see below). Note, ChIP  
44 with H4K20me1 and H2AZ.2 antibodies did not successfully co-precipitate sufficient DNA for  
45 library preparation (Supplemental Fig. 2F). A list of antibodies used is provided in Supplemental  
46 Table 3. Two to three independent biological replicates of native ChIP-seq of histone  
47 modifications in *P. pacificus* were performed by a combination of native ChIP (Brand et al. 2008)  
48 with nematode nuclear isolation (Steiner et al. 2012), with the exception that we did not observe

49 an increase in specificity with hydroxyapatite purification, and therefore this step was not used.  
50 We first disrupted the worm cuticle using liquid nitrogen and mortar and pestle adapted from  
51 Steiner et al., 2012, followed by resuspension in 10 ml nuclei purification buffer (NPB: 10 mM  
52 Tris at pH 7.5, 40 mM NaCl, 90 mM KCl, 2 mM EDTA, 0.5 mM EGTA, 0.2 mM DTT, 0.5 mM  
53 PMSF, 0.5 mM spermidine, 0.25 mM spermine, 0.1% Triton X-100). Cells were lysed by  
54 applying 30-50 strokes of dounce-homogenization, then cell and cuticle debris were removed by  
55 slow centrifugation (100 x g, 2 minutes, room temperature). Nuclei in the supernatant were  
56 purified over a 7.5 ml sucrose cushion (10 mM Hepes, pH 7.5, 30 % w/v sucrose, 1.5 mM  
57 MgCl<sub>2</sub>) for 12 minutes, 4° C, 1,300 x g. Then the sucrose cushion was removed by pipette, and  
58 nuclei were washed by resuspension in 1 ml NPB and centrifuged 10 minutes, 4° C, 1,300 x g.  
59 Nuclei concentration was assessed by A260 nanodrop absorption of a 1:10 dilution in NBP, then  
60 1M CaCl<sub>2</sub> was added to 5 mM final concentration and incubated 37° C for 5 minutes to 'warm  
61 up' the sample, and then 0.015 µl MNase (NEB)/µg chromatin was added and incubated 37° C  
62 for six minutes to digest chromatin to predominately mono-nucleosomes (Supplemental Fig.  
63 S2B). Then 100 mM EGTA was added to 20 mM final concentration to stop the reaction, and 5  
64 M NaCl was added drop-wise to 400 mM final concentration while vortexing on the lowest  
65 setting. Then nuclei were incubated 30 minutes 4° C with rotation to extract nucleosomes from  
66 nuclei, and centrifuged max speed, 4° C, 5 minutes to pellet nuclear debris. Resulting mono and  
67 di-nucleosomes in the supernatant were re-quantified by nanodrop, and diluted to 10-20 ng/µl in  
68 CHIP Buffer 1 (25 mM Tris pH 7.5, 5 mM MgCl<sub>2</sub>, 100 mM KCl, 10% glycerol, 0.1% NP-40, 100  
69 µM PMSF, 50 µg/ml BSA), and immunoprecipitated with histone modification-specific antibodies  
70 conjugated to 20 µl para-magnetic Dynabeads (Invitrogen) for 10 minutes. 2.5 µg of chromatin  
71 (~250-500 µl) was used as input per IP which is a typical amount from 20 x 10 cm plates, and 5  
72 µg Ab were conjugated to 20 µl beads before hand per IP. Washing of IPs was performed for 1  
73 minute with rotation at 4° C, followed by 1 minute magnetic separation, including three tube  
74 changes with the following buffers: 2x with 600 µl CHIP Buffer 2 (25 mM Tris pH 7.5, 5 mM

75 MgCl<sub>2</sub>, 300 mM KCl, 10% glycerol, 0.1% NP-40, 100 μM PMSF, 50 μg/ml BSA), 1x with  
76 CHIP Buffer 3 (10 mM Tris pH 7.5, 250 mM LiCl, 1 mM EDTA, 0.5% Na-Deoxycholate, 0.5%  
77 NP-40, 100 μM PMSF, 50 μg/ml BSA), 1x with CHIP Buffer 1, and 1x with TE buffer.  
78 Immunoprecipitated nucleosomes were eluted in 50 μl elution buffer (50 mM Tris pH 7.5, 1 mM  
79 EDTA, 1% SDS) 55° C for 5 minutes. Supernatant was transferred to a new tube and purified by  
80 adding 2 μl of 5 M NaCl (200 mM final), 1 μl of 500 mM EDTA (10 mM final), and 1 μl of 20  
81 mg/ml Proteinase K (0.4 mg/ml final) and incubating 55° C for 2 hours, followed by 3 volumes of  
82 Ampure XP bead addition and purification, and elution in 50 μl TE buffer. Recovered DNA was  
83 verified for specificity by qPCR (Supplemental Fig. S2D), and then converted to Illumina  
84 sequencing libraries using a TruSeq Nano kit, and sequenced on an Illumina HiSeq 3000.

85

#### 86 **Iso-Seq**

87 In order to increase representation of stage- and condition-specific transcripts, RNA used for the  
88 Iso-Seq experiment was collected from worms of different ages and grown in two different  
89 culture conditions, which are known to influence multiple aspects of nematode physiology, such  
90 as body morphology and development of feeding structures (Werner et al. 2017). First, eggs  
91 were synchronized by bleaching (see above, Stiernagle 2016). After bleach-synchronization,  
92 eggs were hatched in one of the two following conditions. Half of the eggs were added to 10 cm  
93 agar plates with Nematode Growth Medium (NGM) spotted with 1 mL of overnight culture of  
94 *Escherichia coli* OP50. Another half were transferred to 25 mL conical flasks with 10 mL of S-  
95 medium that contained re-suspended bacteria in the amount corresponding to 100 mL of an  
96 overnight culture with OD600 of 0.5. Flasks with liquid cultures were incubated on a shaking  
97 platform at 180 rpm. Worms were collected from both solid and liquid cultures at three time  
98 points - 24 h, 55-60 h and 75 h. Samples collected at 24 h contained a mixture of J2 and J3  
99 (early juvenile stages) and samples collected at 55-60 h contained a mixture of J4 (late juvenile  
100 stage) and young adults. At 75 h, the majority of animals were gravid adults. They were

101 bleached as described above to extract embryos and J1 (egg-bound juvenile stage). RNA was  
102 extracted from all samples separately using TRIzol Reagent (Invitrogen) including 3x freeze-  
103 thaw cycles, and chloroform, and RNA was purified from the aqueous phase using RNA Clean  
104 and Concentrator kit (Zymo Research). Extracted RNA was quantified using Nanodrop One C  
105 (Thermo Scientific) and quality was verified using capillary electrophoresis performed on  
106 Bioanalyzer 2100 in combination with RNA 6000 Nano Kit (Agilent Technologies). After the  
107 quality control step, equal amounts of RNA from different time points were pooled. Two  
108 separate pools were made for worms grown on agar plates and in the liquid medium. 1 ug of  
109 RNA was taken from each pool and first-strand cDNA synthesis was performed using SMARTer  
110 PCR cDNA Synthesis Kit (Clontech Laboratories). These cDNA samples were labelled as  
111 “direct” and presumably only contained cDNA reverse-transcribed from polyadenylated  
112 transcripts. Another 4 ug of RNA was taken from each pool and split into “rRNA-depleted” and  
113 “control” samples. The “rRNA-depleted” samples were purified from ribosomal RNA (rRNA)  
114 using Ribo-Zero rRNA Removal Kit (Human/Mouse/Rat) (Illumina) and both samples were *in*  
115 *vitro* polyadenylated using E. coli Poly(A) Polymerase (New England Biolabs) to enrich the  
116 polyA RNA profile for transcripts that are not, or under-polyadenylated *in vivo*. cDNA synthesis  
117 was performed as described above, and the efficiency of rRNA depletion was verified by  
118 comparing relative abundances of rRNA in the “rRNA-depleted” and the “control” samples using  
119 real-time quantitative PCR (qPCR)(Supplemental Fig. S1A). Primers targeted 18S rRNA, 28S  
120 rRNA and a reference gene *Ppa-cdc-42*(Schuster and Sommer 2012), and qPCR was  
121 performed on a LightCycler 480 Instrument using LightCycler 480 SYBR Green I Master  
122 (Roche). “Direct” and “rRNA-depleted” cDNA was further converted into SMRTbell libraries  
123 following the guidelines provided by Pacific Biosciences. In short, cDNA was amplified by PCR  
124 using PrimeSTAR GXL Polymerase (Clontech Laboratories). Optimal number of cycles (12  
125 cycles) was identified based on band intensity and size distribution of amplification products run  
126 on a 1% agarose gel (Supplemental Fig. S1B). Amplified cDNA was repaired from damage

127 using SMRTbell Damage Repair Kit-SPv3 (Pacific Biosciences) and ligated to sequencing  
128 adapters, followed by exonuclease treatment using SMRTbell Template Prep Kit 1.0-SPv3.  
129 Optional size selection step was omitted. Libraries were sequenced on the Sequel System using  
130 Sequel Binding Kit 2.0, Sequel Sequencing Kit 2.0, Sequencing Primer v3 and Sequel SMRT  
131 Cell 1M v2 Trays (Pacific Biosciences). Each sample (“direct” and “rRNA-depleted” for liquid  
132 culture, “direct” and “rRNA-depleted” for agar plates) was run on two SMRT Cells in separate  
133 runs, totaling to 2 trays of 4 SMRT Cells. The following parameters were used for library loading  
134 and sequencing: MagBead loading at 20 pM (first run) or 30 pM (second run), 120 min  
135 immobilization, 120 min pre-extension, 600 min movie. Sequencing of one SMRT Cell  
136 containing “rRNA-depleted” sample for agar plates failed as a result of a manufacturing defect.  
137 The rest of SMRT Cells produced the sequencing output of 2.1-4.3 Gb each with mean  
138 polymerase read length of 17-25 kb. SMRT Link software version 4.0.0 (Pacific Biosciences)  
139 was used to convert subreads to circular consensus sequences and identify full-length non-  
140 chimeric reads.

141

#### 142 **ATAC-seq**

143 To obtain regions of open chromatin we followed the omni-ATAC protocol (Corces et al. 2017)  
144 with purified worm nuclei from  $\geq 15$   $\mu$ l of worm pellet. After the Iodixanol centrifugation, a 200  $\mu$ l  
145 nuclear band was mixed with 1 ml ATAC-RSB/0.1% Tween-20 solution, and centrifuged 10  
146 minutes, 500 x g, 4°C. Typically a pellet was not visible at this stage, however 12.5  $\mu$ l was  
147 pipetted from the bottom of the tube and used for the transposon reaction. The duration and  
148 amount of transposase enzyme were the same as described in the Corces et al. protocol. After  
149 purification, ATAC libraries were size-selected using a BluePippin (Sage Science), and  
150 sequenced on site on an Illumina HiSeq3000. Technical replicates of each biological replicate  
151 were prepared with different illumina adapters, and after mapping the resulting .bam files were  
152 merged.

153

#### 154 **Bioinformatic data analysis**

155 Iso-Seq reads were mapped to the El Paco assembly of the *P. pacificus* genome (Rödelsperger  
156 et al. 2017) using GMAP (Wu and Watanabe 2005). Reads of the same samples from different  
157 sequencing runs were merged, sorted and indexed using SAMtools (Li et al. 2009)(2009). Gene  
158 annotations were derived from Stringtie (Pertea et al. 2016) using guided assembly ('-G' option)  
159 with the El Paco reference for both 'direct' and 'rRNA-depleted total RNA'. Gene annotations  
160 were then compared to El Paco for gene length and exon number using the density function in  
161 R. Isoforms were assessed by converting .gff annotations to .bed with a constant numerical 5<sup>th</sup>  
162 column (1000), then parsing overlapping transcripts using BEDTools merge and performing  
163 'sum' on the 5<sup>th</sup> column, and selecting genes that had greater than 1000 in this column.  
164 Isoforms with the same start and stop coordinates were selected (again using BEDTools merge  
165 and selecting genes with 'distinct' coordinates = 1), and a histogram of distinct coordinates was  
166 plotted in R. Iso-Seq coverage of evolutionary gene classes was assessed by BEDTools  
167 coverage, and density of exons and gene lengths was determined as before with the entire  
168 annotation, but broken down by class.

169 For ChIP- and ATAC-seq, Illumina Fastq reads were aligned to the El Paco reference  
170 genome (Rödelsperger et al. 2017) using Bowtie 2. The output .bam files were converted to  
171 .sam using samtools and peaks were called independently for each biological replicate with  
172 MACS2 (macs2 callpeak --broad -t Ab.bam -c Input.bam -f BAMPE -g 15e7 -n Ab\_BP -B -m 2  
173 50) (Supplementary Fig. S3). Input samples were processed and sequenced identically for each  
174 biological replicate, and used as background control in MACS2 analysis. For duplicate data,  
175 overlapping BroadPeaks were merged to create a genome-wide histone peak data set, and for  
176 triplicate data (H3K4me1 and H3K4me3) we performed a multiIntersect (BEDTools), which  
177 identified 6,081 H3K4me3 and 6,720 H3K4me1 locations that exhibited a peak in each of the  
178 three replicates (Supplemental Table S1, ex. Supplemental Fig. S4A). To assess replicability

179 between duplicate data, we determined the fraction of overlapping peaks compared to the total  
180 amount of peaks (displayed as a weighted Venn Diagram in Supplemental Fig. S4B). For  
181 triplicate data we determined overlapping peaks for each sample with either of the other two  
182 samples, and for simplicity displayed the percent unique per replicate as an un-weighted Venn  
183 Diagram (weighted Venn Diagrams for three samples are mathematically  
184 impossible)(Supplemental Fig. S4B). Most of the Ab ChIP-seq and ATAC-seq replicates  
185 exhibited between 70-90% replicability of the smaller (fewer peaks) sample for duplicate data, or  
186 the average for triplicate data (Supplemental Fig. S4C). We set a minimum threshold of  $\geq 50\%$   
187 overlap, which led to the removal of H2bub (27.5% overlap), H3K9ac (40.9% overlap), and  
188 H3K79me2 (49.8% overlap) data from further analysis. Although H3K9me3 exhibits relatively  
189 poor reproducibility to the other remaining samples (54% compared to  $>70\%$ ), we chose to keep  
190 it as 1) its broad distribution can make peak calling challenging, and 2) although H3K9me3  
191 antibodies are generally less specific (Nishikori et al. 2012; Hattori et al. 2013), ChIP-seq data  
192 sets from multiple samples and organisms suggest it can still provide relevant information to  
193 distinguish facultative vs. constitutive heterochromatin (Trojer and Reinberg 2007).

194 Mapped replicate reads were normalized by coverage (depth x alignment rate) using  
195 samtools sub-sampling (samtools view -h -b -s), then combined using samtools 'merge' for  
196 chromatin state annotation with ChromHMM (Ernst and Kellis 2012) with a strict Poisson  
197 threshold (-stricthresh) and bin center (-center) options in 'BinarizeBam', and eight chromatin  
198 states (LearnModel binarized\_files std\_out 8 gene\_\_assembly). Candidate state annotations  
199 were derived from previous observations in other organisms (Ernst et al. 2011; ENCODE  
200 Project Consortium 2012; Zentner et al. 2011; Consortium et al. 2015). Heatmaps of promoters  
201 and enhancers for different histone marks were made in R with combined replicate .bams using  
202 'Pheatmap' from a matrix of per locus densities created in HOMER using 'annotatePeaks' -ghist.  
203 Rows were clustered from high to low densities, and colored from high to low  $\log_2(\text{coverage})+1$ ,  
204 the same scale was used for per mark for both promoters and enhancers. Sequence motifs



205 found in promoters and enhancers were obtained from HOMER using ‘findMotifs’ with standard  
206 options, and data presented are from a *de novo* motif search. Genomic loci presented are  
207 derived from Integrated Genome Viewer (IGV) images of combined replicate .bam files. Density  
208 of histone and ATAC-seq reads across the TSS of each evolutionary gene class were  
209 calculated in HOMER using combined .bams of replicates, and normalized by the high and low  
210 values from each data set. Meta-gene profiles of promoter and active enhancer locations  
211 relative to gene-bodies (+/-20 percent from ‘slopBed’) were obtained using the HOMER tool  
212 ‘makeMetaGeneProfile.pl’.

213         Stranded RNA-seq data from two biological adult replicates were prepared by NEBNext  
214 Ultra Directional RNA-seq for Illumina kits, and mapped to El Paco using HISAT2 with standard  
215 parameters. Average expression (FPKM) from the two biological replicates of the reference  
216 gene annotation or evolutionary gene classes was determined by Stringtie and Ballgown(Pertea  
217 et al. 2016), and plotted in R by gene count. Expression groups were binned according to  
218 approximate inflection points. Distances in base pairs between evolutionary gene class TSSs to  
219 the nearest promoter (chromatin state 2) or enhancer (chromatin states 1 and 8) were obtained  
220 with the ‘closestBed’ function from BEDTools, and ordered and plotted in R in kilobase (kb).

221

## 222 **Supplemental References**

223 Brand M, Rampalli S, Chaturvedi C-P, Dilworth FJ. 2008. Analysis of epigenetic modifications of  
224 chromatin at specific gene loci by native chromatin immunoprecipitation of nucleosomes  
225 isolated using hydroxyapatite chromatography. *Nat Protoc* **3**: 398–409.

226 Consortium RE, Kundaje A, Meuleman W, Ernst J, Bilenky M, Yen A, Heravi-Moussavi A,  
227 Kheradpour P, Zhang Z, Wang J, et al. 2015. Integrative analysis of 111 reference human  
228 epigenomes. *Nature* **518**: 317–330.

229 Corces MR, Trevino AE, Hamilton EG, Greenside PG, Sinnott-Armstrong NA, Vesuna S,  
230 Satpathy AT, Rubin AJ, Montine KS, Wu B, et al. 2017. An improved ATAC-seq protocol  
231 reduces background and enables interrogation of frozen tissues. *Nat Methods* **14**: 959–962.

232 ENCODE Project Consortium. 2012. An integrated encyclopedia of DNA elements in the human  
233 genome. *Nature* **489**: 57–74.

- 234 Ernst J, Kellis M. 2012. ChromHMM: automating chromatin-state discovery and  
235 characterization. *Nat Methods* **9**: 215–216.
- 236 Ernst J, Kheradpour P, Mikkelsen TS, Shores N, Ward LD, Epstein CB, Zhang X, Wang L,  
237 Issner R, Coyne M, et al. 2011. Mapping and analysis of chromatin state dynamics in nine  
238 human cell types. *Nature* **473**: 43–49.
- 239 Hattori T, Taft JM, Swist KM, Luo H, Witt H, Slattery M, Koide A, Ruthenburg AJ, Krajewski K,  
240 Strahl BD, et al. 2013. Recombinant antibodies to histone post-translational modifications.  
241 *Nat Methods* **10**: 992–995.
- 242 Landt SG, Marinov GK, Kundaje A, Kheradpour P, Pauli F, Batzoglou S, Bernstein BE, Bickel P,  
243 Brown JB, Cayting P, et al. 2012. ChIP-seq guidelines and practices of the ENCODE and  
244 modENCODE consortia. *Genome Res* **22**: 1813–1831.
- 245 Nishikori S, Hattori T, Fuchs SM, Yasui N, Wojcik J, Koide A, Strahl BD, Koide S. 2012. Broad  
246 Ranges of Affinity and Specificity of Anti-Histone Antibodies Revealed by a Quantitative  
247 Peptide Immunoprecipitation Assay. *Journal of Molecular Biology* **424**: 391–399.
- 248 Pertea M, Kim D, Pertea GM, Leek JT, Salzberg SL. 2016. Transcript-level expression analysis  
249 of RNA-seq experiments with HISAT, StringTie and Ballgown. *Nat Protoc* **11**: 1650–1667.
- 250 Rödelsperger C, Meyer JM, Prabh N, Lanz C, Bemm F, Sommer RJ. 2017. Single-Molecule  
251 Sequencing Reveals the Chromosome-Scale Genomic Architecture of the Nematode Model  
252 Organism *Pristionchus pacificus*. *Cell Rep* **21**: 834–844.
- 253 Schuster LN, Sommer RJ. 2012. Expressional and functional variation of horizontally acquired  
254 cellulases in the nematode *Pristionchus pacificus*. *Gene* **506**: 274–282.
- 255 Seroby V, Xiao H, Namdeo S, Rödelsperger C, Sieriebriennikov B, Witte H, Röseler W,  
256 Sommer RJ. 2016. Chromatin remodelling and antisense-mediated up-regulation of the  
257 developmental switch gene *eud-1* control predatory feeding plasticity. *Nat Commun* **7**:  
258 12337.
- 259 Steiner FA, Talbert PB, Kasinathan S, Deal RB, Henikoff S. 2012. Cell-type-specific nuclei  
260 purification from whole animals for genome-wide expression and chromatin profiling.  
261 *Genome Res* **22**: 766–777.
- 262 Stiernagle T. 2006. *Maintenance of C. elegans*, *WormBook*, ed. *The C. elegans Research*  
263 *Community*. WormBook.
- 264 Trojer P, Reinberg D. 2007. Facultative Heterochromatin: Is There a Distinctive Molecular  
265 Signature? *Mol Cell* **28**: 1–13.
- 266 Werner MS, Sieriebriennikov B, Loschko T, Namdeo S, Lenuzzi M, Dardiry M, Renahan T,  
267 Sharma DR, Sommer RJ. 2017. Environmental influence on *Pristionchus pacificus* mouth  
268 form through different culture methods. *Sci Rep* **7**: 7207.
- 269 Wu TD, Watanabe CK. 2005. GMAP: a genomic mapping and alignment program for mRNA  
270 and EST sequences. *Bioinformatics* **21**: 1859–1875.

271 Zentner GE, Tesar PJ, Scacheri PC. 2011. Epigenetic signatures distinguish multiple classes of  
272 enhancers with distinct cellular functions. *Genome Res* **21**: 1273–1283.

273 2009. The Sequence Alignment/Map format and SAMtools. **25**: 2078–2079.  
274 [http://eutils.ncbi.nlm.nih.gov/entrez/eutils/elink.fcgi?dbfrom=pubmed&id=19505943&retmod](http://eutils.ncbi.nlm.nih.gov/entrez/eutils/elink.fcgi?dbfrom=pubmed&id=19505943&retmode=ref&cmd=prlinks)  
275 [e=ref&cmd=prlinks](http://eutils.ncbi.nlm.nih.gov/entrez/eutils/elink.fcgi?dbfrom=pubmed&id=19505943&retmode=ref&cmd=prlinks).

276
