# Supplementary material for: Young genes have distinct gene structure, epigenetic profiles, and transcriptional regulation
Source: HighWire-hosted journal article supplement (doi:10.1101/gr.234872.118), 2018-09-19
Supplement: SupplementalTable1_BroadPeaks.xlsx [file SupplementalTable1_BroadPeaks.xlsx]

## Sheet: legend
SupplementalTable1: Peak overlaps between replicates. To use and view tracks in .bed format, simply copy and paste into a text editor and save as newfile.bed. For triplicate data sets (H3K4me3 and H3K4me1), an additonal column is present to describe which of the three replicates overlapped. Peaks were determiend by MACS2 'broakPeak' (Zhang et al. 2008), and overlaps were determined by BEDTools (Q…

## Sheet: H3K4me3
Chr	start	stop	replicate overlap
ChrI	248	738	1,2,3
ChrI	3073	3691	1,2,3
ChrI	9907	10147	1,2,3
ChrI	60993	63942	1,2,3
ChrI	122226	123968	1,2,3
ChrI	135187	135802	1,2,3
ChrI	136911	138905	1,2,3
ChrI	185307	186890	1,2,3
ChrI	228262	231127	1,2,3
ChrI	269501	270293	1,2,3
ChrI	297364	297990	1,2,3
ChrI	341473	345908	1,2,3
ChrI	350789	352915	1,2,3
ChrI	419013	419638	1,2,3
ChrI	422441	424847	1,2,3
ChrI	537455	540524	1,2,3
ChrI	550421	551085	1,2,3
ChrI	568141	568917	1,2,3
ChrI	582526	583926	1,2,3
ChrI	609262	609492	1,2,3
ChrI	665784	666821	1,2,3
ChrI	672939	674093	1,2,3
ChrI	701009	701607	1,2,3
ChrI	706539	707375	1,2,3
ChrI	708350	711459	1,2,3
ChrI	712401	716165	1,2,3
ChrI	720630	723344	1,2,3
ChrI	726012	727241	1,2,3
ChrI	795081	795401	1,2,3
ChrI	864408	864870	1,2,3
ChrI	1035468	1035929	1,2,3
ChrI	1110297	1110771	1,2,3
ChrI	1308852	1309274	1,2,3
ChrI	1657455	1657523	1,2,3
ChrI	1792956	1793619	1,2,3
ChrI	1847360	1848750	1,2,3
ChrI	1860541	1861821	1,2,3
ChrI	1870462	1871252	1,2,3
ChrI	1954225	1955009	1,2,3
ChrI	2042397	2043046	1,2,3
ChrI	2085018	2085674	1,2,3
ChrI	2089786	2090381	1,2,3
ChrI	2104741	2105001	1,2,3
ChrI	2161118	2163080	1,2,3
ChrI	2176265	2177594	1,2,3
ChrI	2178936	2181017	1,2,3
ChrI	2273193	2275123	1,2,3
ChrI	2280424	2281582	1,2,3
ChrI	2288078	2289467	1,2,3
ChrI	2314162	2314393	1,2,3
ChrI	2458558	2460278	1,2,3
ChrI	2485042	2487186	1,2,3
ChrI	2612733	2612778	1,2,3
ChrI	2620848	2623163	1,2,3
ChrI	2719481	2720405	1,2,3
ChrI	2788927	2789181	1,2,3
ChrI	2797302	2798249	1,2,3
ChrI	2914763	2915002	1,2,3
ChrI	2931122	2931261	1,2,3
ChrI	2933383	2934018	1,2,3
ChrI	2943256	2944018	1,2,3
ChrI	2988093	2988305	1,2,3
ChrI	2989691	2992422	1,2,3
ChrI	3058172	3059248	1,2,3
ChrI	3085533	3085783	1,2,3
ChrI	3129880	3130099	1,2,3
ChrI	3131513	3133169	1,2,3
ChrI	3204503	3206672	1,2,3
ChrI	3623180	3623823	1,2,3
ChrI	3624629	3627241	1,2,3
ChrI	3650999	3651292	1,2,3
ChrI	3680922	3681545	1,2,3
ChrI	3726735	3727068	1,2,3
ChrI	3798594	3798961	1,2,3
ChrI	3996049	3996597	1,2,3
ChrI	4176215	4178815	1,2,3
ChrI	4179877	4181225	1,2,3
ChrI	4214270	4215132	1,2,3
ChrI	4226636	4227529	1,2,3
ChrI	4343725	4343910	1,2,3
ChrI	4351478	4351864	1,2,3
ChrI	4378034	4379811	1,2,3
ChrI	4540974	4542507	1,2,3
ChrI	4558237	4561275	1,2,3
ChrI	4596430	4597579	1,2,3
ChrI	4629699	4631208	1,2,3
ChrI	4632827	4633845	1,2,3
ChrI	4666102	4667851	1,2,3
ChrI	4669217	4670007	1,2,3
ChrI	4674913	4675232	1,2,3
ChrI	4679386	4684970	1,2,3
ChrI	4695169	4695633	1,2,3
ChrI	4709778	4710295	1,2,3
ChrI	4787038	4787882	1,2,3
ChrI	4809425	4809989	1,2,3
ChrI	4834432	4834852	1,2,3
ChrI	4892828	4895126	1,2,3
ChrI	4915983	4917612	1,2,3
ChrI	4918542	4918801	1,2,3
ChrI	4923482	4923841	1,2,3
ChrI	4925725	4926323	1,2,3
ChrI	4928424	4928563	1,2,3
ChrI	4931348	4931509	1,2,3
ChrI	4960892	4965221	1,2,3
ChrI	4990327	4991928	1,2,3
ChrI	5019623	5021204	1,2,3
ChrI	5075515	5075653	1,2,3
ChrI	5079750	5080089	1,2,3
ChrI	5152997	5154024	1,2,3
ChrI	5227401	5228750	1,2,3
ChrI	5279350	5280075	1,2,3
ChrI	5289432	5290967	1,2,3
ChrI	5338518	5340775	1,2,3
ChrI	5406325	5406888	1,2,3
ChrI	5429814	5429870	1,2,3
ChrI	5511374	5512792	1,2,3
ChrI	5536689	5540844	1,2,3
ChrI	5543241	5543780	1,2,3
ChrI	5544713	5546812	1,2,3
ChrI	5576674	5577068	1,2,3
ChrI	5648291	5648414	1,2,3
ChrI	5692862	5694031	1,2,3
ChrI	5704081	5704294	1,2,3
ChrI	5739378	5739601	1,2,3
ChrI	5741159	5742880	1,2,3
ChrI	5744338	5748684	1,2,3
ChrI	5964683	5965002	1,2,3
ChrI	6001803	6002758	1,2,3
ChrI	6063642	6064317	1,2,3
ChrI	6076019	6076273	1,2,3
ChrI	6102047	6102184	1,2,3
ChrI	6105012	6105590	1,2,3
ChrI	6236146	6236420	1,2,3
ChrI	6247033	6247275	1,2,3
ChrI	6268758	6268810	1,2,3
ChrI	6314463	6315611	1,2,3
ChrI	6323499	6323956	1,2,3
ChrI	6332540	6333538	1,2,3
ChrI	6356293	6356526	1,2,3
ChrI	6368838	6370573	1,2,3
ChrI	6391570	6405154	1,2,3
ChrI	6449205	6450357	1,2,3
ChrI	6457951	6458034	1,2,3
ChrI	6764937	6767745	1,2,3
ChrI	6768820	6769058	1,2,3
ChrI	6782852	6782865	1,2,3
ChrI	6783952	6786391	1,2,3
ChrI	6857491	6859091	1,2,3
ChrI	6932959	6933270	1,2,3
ChrI	7132258	7133589	1,2,3
ChrI	7143344	7146861	1,2,3
ChrI	7157169	7158857	1,2,3
ChrI	7161173	7163838	1,2,3
ChrI	7176958	7181039	1,2,3
ChrI	7193561	7194177	1,2,3
ChrI	7218742	7223230	1,2,3
ChrI	7232261	7234007	1,2,3
ChrI	7250029	7250484	1,2,3
ChrI	7264810	7266382	1,2,3
ChrI	7278147	7279228	1,2,3
ChrI	7287872	7289407	1,2,3
ChrI	7294356	7296442	1,2,3
ChrI	7347676	7348148	1,2,3
ChrI	7397713	7398808	1,2,3
ChrI	7408732	7409067	1,2,3
ChrI	7523365	7523466	1,2,3
ChrI	7525523	7527342	1,2,3
ChrI	7538622	7539530	1,2,3
ChrI	7556475	7558156	1,2,3
ChrI	7559637	7560213	1,2,3
ChrI	7567201	7568510	1,2,3
ChrI	7575057	7578177	1,2,3
ChrI	7586219	7586431	1,2,3
ChrI	7592973	7596525	1,2,3
ChrI	7601681	7602573	1,2,3
ChrI	7630670	7631850	1,2,3
ChrI	7729043	7730792	1,2,3
ChrI	7764411	7765383	1,2,3
ChrI	7817425	7820076	1,2,3
ChrI	7827051	7827462	1,2,3
ChrI	7835099	7835830	1,2,3
ChrI	7874220	7875446	1,2,3
ChrI	8015227	8016987	1,2,3
ChrI	8033371	8033941	1,2,3
ChrI	8067493	8068601	1,2,3
ChrI	8075685	8079494	1,2,3
ChrI	8086245	8089995	1,2,3
ChrI	8092870	8093779	1,2,3
ChrI	8096895	8099720	1,2,3
ChrI	8101227	8102390	1,2,3
ChrI	8119593	8119975	1,2,3
ChrI	8123199	8126576	1,2,3
ChrI	8137096	8138500	1,2,3
ChrI	8141757	8142179	1,2,3
ChrI	8143026	8143409	1,2,3
ChrI	8156221	8160312	1,2,3
ChrI	8164020	8164973	1,2,3
ChrI	8276508	8278972	1,2,3
ChrI	8305086	8305760	1,2,3
ChrI	8313276	8314205	1,2,3
ChrI	8701692	8702100	1,2,3
ChrI	8717634	8718823	1,2,3
ChrI	8750810	8751670	1,2,3
ChrI	8874164	8878954	1,2,3
ChrI	8968358	8969480	1,2,3
ChrI	9082914	9083121	1,2,3
ChrI	9111248	9112179	1,2,3
ChrI	9121735	9122035	1,2,3
ChrI	9123200	9126221	1,2,3
ChrI	9129168	9129751	1,2,3
ChrI	9133801	9134357	1,2,3
ChrI	9138615	9139147	1,2,3
ChrI	9141703	9143594	1,2,3
ChrI	9153954	9156230	1,2,3
ChrI	9265751	9266902	1,2,3
ChrI	9269318	9269654	1,2,3
ChrI	9276260	9280258	1,2,3
ChrI	9284787	9286295	1,2,3
ChrI	9291532	9292132	1,2,3
ChrI	9367997	9368832	1,2,3
ChrI	9425117	9426758	1,2,3
ChrI	9445396	9446447	1,2,3
ChrI	9447444	9449135	1,2,3
ChrI	9450184	9451501	1,2,3
ChrI	9452500	9453043	1,2,3
ChrI	9488027	9490069	1,2,3
ChrI	9490928	9493828	1,2,3
ChrI	9516220	9520535	1,2,3
ChrI	9537747	9538957	1,2,3
ChrI	9558164	9562642	1,2,3
ChrI	9566213	9566976	1,2,3
ChrI	9571994	9572724	1,2,3
ChrI	9669803	9670705	1,2,3
ChrI	9678128	9678373	1,2,3
ChrI	9680712	9680926	1,2,3
ChrI	9694589	9695547	1,2,3
ChrI	9696669	9697062	1,2,3
ChrI	9698224	9698982	1,2,3
ChrI	9733389	9733643	1,2,3
ChrI	9742126	9744083	1,2,3
ChrI	9754722	9755529	1,2,3
ChrI	9760080	9760203	1,2,3
ChrI	9771954	9772866	1,2,3
ChrI	9784790	9786723	1,2,3
ChrI	9808637	9810821	1,2,3
ChrI	9812034	9814600	1,2,3
ChrI	9820924	9823945	1,2,3
ChrI	9848603	9850450	1,2,3
ChrI	9853937	9855546	1,2,3
ChrI	9856652	9859385	1,2,3
ChrI	9880869	9880965	1,2,3
ChrI	9882830	9884753	1,2,3
ChrI	9893708	9894011	1,2,3
ChrI	9921190	9921541	1,2,3
ChrI	9970529	9970862	1,2,3
ChrI	9987592	9992462	1,2,3
ChrI	10002298	10004107	1,2,3
ChrI	10014835	10015419	1,2,3
ChrI	10019442	10019952	1,2,3
ChrI	10022551	10023490	1,2,3
ChrI	10025696	10026825	1,2,3
ChrI	10030993	10033593	1,2,3
ChrI	10035250	10036247	1,2,3
ChrI	10043314	10044120	1,2,3
ChrI	10045702	10047781	1,2,3
ChrI	10061015	10063928	1,2,3
ChrI	10073407	10074505	1,2,3
ChrI	10078118	10079419	1,2,3
ChrI	10080263	10080472	1,2,3
ChrI	10155435	10155474	1,2,3
ChrI	10156690	10162820	1,2,3
ChrI	10163599	10163853	1,2,3
ChrI	10167750	10168075	1,2,3
ChrI	10169637	10170921	1,2,3
ChrI	10171777	10171881	1,2,3
ChrI	10173409	10174942	1,2,3
ChrI	10183323	10183696	1,2,3
ChrI	10187386	10187689	1,2,3
ChrI	10191783	10198428	1,2,3
ChrI	10201698	10203522	1,2,3
ChrI	10368184	10370570	1,2,3
ChrI	10371430	10372503	1,2,3
ChrI	10373953	10374219	1,2,3
ChrI	10386352	10388249	1,2,3
ChrI	10403460	10405959	1,2,3
ChrI	10407064	10408813	1,2,3
ChrI	10417264	10417641	1,2,3
ChrI	10423431	10425299	1,2,3
ChrI	10441273	10442234	1,2,3
ChrI	10443928	10448826	1,2,3
ChrI	10449821	10450832	1,2,3
ChrI	10454034	10455679	1,2,3
ChrI	10458068	10459433	1,2,3
ChrI	10465301	10467279	1,2,3
ChrI	10468112	10474141	1,2,3
ChrI	10494467	10500194	1,2,3
ChrI	10502781	10506790	1,2,3
ChrI	10514591	10516450	1,2,3
ChrI	10517857	10522537	1,2,3
ChrI	10524412	10525028	1,2,3
ChrI	10567149	10567903	1,2,3
ChrI	10570229	10570597	1,2,3
ChrI	10571457	10571895	1,2,3
ChrI	10574737	10576787	1,2,3
ChrI	10577927	10578973	1,2,3
ChrI	10592197	10594619	1,2,3
ChrI	10607789	10608714	1,2,3
ChrI	10610809	10611384	1,2,3
ChrI	10612279	10613004	1,2,3
ChrI	10613888	10617968	1,2,3
ChrI	10619514	10620250	1,2,3
ChrI	10623834	10624137	1,2,3
ChrI	10627378	10631613	1,2,3
ChrI	10634914	10635378	1,2,3
ChrI	10640461	10641404	1,2,3
ChrI	10650441	10651656	1,2,3
ChrI	10657468	10664496	1,2,3
ChrI	10668781	10670969	1,2,3
ChrI	10672316	10673365	1,2,3
ChrI	10705883	10707368	1,2,3
ChrI	10708375	10709873	1,2,3
ChrI	10713963	10715066	1,2,3
ChrI	10720212	10720339	1,2,3
ChrI	10738907	10739712	1,2,3
ChrI	10749406	10750016	1,2,3
ChrI	10766544	10768143	1,2,3
ChrI	10771916	10772778	1,2,3
ChrI	10775159	10778510	1,2,3
ChrI	10803277	10804301	1,2,3
ChrI	10861151	10861958	1,2,3
ChrI	10864148	10865057	1,2,3
ChrI	10872585	10873267	1,2,3
ChrI	10889719	10891110	1,2,3
ChrI	10900835	10901302	1,2,3
ChrI	10903074	10904166	1,2,3
ChrI	10953018	10953363	1,2,3
ChrI	10958774	10960391	1,2,3
ChrI	10963825	10967596	1,2,3
ChrI	10974113	10977327	1,2,3
ChrI	10979211	10980638	1,2,3
ChrI	10988858	10989192	1,2,3
ChrI	10992018	10993088	1,2,3
ChrI	10994939	10995164	1,2,3
ChrI	10996238	10999234	1,2,3
ChrI	11013661	11014507	1,2,3
ChrI	11015342	11016668	1,2,3
ChrI	11018433	11019360	1,2,3
ChrI	11020344	11022189	1,2,3
ChrI	11027015	11027954	1,2,3
ChrI	11040894	11041723	1,2,3
ChrI	11050029	11051890	1,2,3
ChrI	11063027	11064101	1,2,3
ChrI	11072404	11073487	1,2,3
ChrI	11077624	11080148	1,2,3
ChrI	11080980	11081447	1,2,3
ChrI	11085002	11085253	1,2,3
ChrI	11086076	11093281	1,2,3
ChrI	11098631	11099069	1,2,3
ChrI	11101243	11101935	1,2,3
ChrI	11109106	11109634	1,2,3
ChrI	11112399	11113289	1,2,3
ChrI	11114320	11115801	1,2,3
ChrI	11120694	11120737	1,2,3
ChrI	11126559	11127435	1,2,3
ChrI	11128681	11130336	1,2,3
ChrI	11133971	11134801	1,2,3
ChrI	11155839	11157410	1,2,3
ChrI	11163198	11167292	1,2,3
ChrI	11192152	11194028	1,2,3
ChrI	11203020	11204220	1,2,3
ChrI	11205407	11207124	1,2,3
ChrI	11244640	11247058	1,2,3
ChrI	11248467	11251313	1,2,3
ChrI	11274063	11275836	1,2,3
ChrI	11276931	11278331	1,2,3
ChrI	11282686	11285744	1,2,3
ChrI	11286930	11291138	1,2,3
ChrI	11306092	11306287	1,2,3
ChrI	11308330	11308935	1,2,3
ChrI	11309931	11317113	1,2,3
ChrI	11318103	11318781	1,2,3
ChrI	11334749	11335395	1,2,3
ChrI	11336876	11343148	1,2,3
ChrI	11346304	11347247	1,2,3
ChrI	11356418	11357028	1,2,3
ChrI	11358268	11360135	1,2,3
ChrI	11365572	11367007	1,2,3
ChrI	11368570	11368964	1,2,3
ChrI	11371379	11372905	1,2,3
ChrI	11387798	11388123	1,2,3
ChrI	11392237	11395027	1,2,3
ChrI	11411515	11411672	1,2,3
ChrI	11419631	11421376	1,2,3
ChrI	11422483	11423028	1,2,3
ChrI	11427090	11429103	1,2,3
ChrI	11430178	11430804	1,2,3
ChrI	11442487	11442570	1,2,3
ChrI	11443705	11447253	1,2,3
ChrI	11448772	11453211	1,2,3
ChrI	11454348	11454838	1,2,3
ChrI	11462195	11462509	1,2,3
ChrI	11477733	11478243	1,2,3
ChrI	11482695	11485444	1,2,3
ChrI	11487900	11489130	1,2,3
ChrI	11495430	11497088	1,2,3
ChrI	11498347	11498617	1,2,3
ChrI	11514585	11516521	1,2,3
ChrI	11527484	11529278	1,2,3
ChrI	11530704	11530972	1,2,3
ChrI	11559175	11560603	1,2,3
ChrI	11565464	11565646	1,2,3
ChrI	11580680	11580906	1,2,3
ChrI	11582532	11582803	1,2,3
ChrI	11585517	11585557	1,2,3
ChrI	11586351	11586933	1,2,3
ChrI	11587978	11589512	1,2,3
ChrI	11603351	11604602	1,2,3
ChrI	11608954	11609203	1,2,3
ChrI	11612232	11612611	1,2,3
ChrI	11727379	11728475	1,2,3
ChrI	11737167	11738516	1,2,3
ChrI	11752089	11752713	1,2,3
ChrI	11756572	11756723	1,2,3
ChrI	11771712	11777601	1,2,3
ChrI	11816613	11817194	1,2,3
ChrI	11818443	11820630	1,2,3
ChrI	11822410	11825972	1,2,3
ChrI	11849448	11849733	1,2,3
ChrI	11858633	11861096	1,2,3
ChrI	11898645	11899697	1,2,3
ChrI	11922458	11923238	1,2,3
ChrI	11979568	11981087	1,2,3
ChrI	11982056	11990485	1,2,3
ChrI	11991498	12001501	1,2,3
ChrI	12006652	12008616	1,2,3
ChrI	12029657	12030620	1,2,3
ChrI	12035577	12035742	1,2,3
ChrI	12052448	12055125	1,2,3
ChrI	12064556	12065404	1,2,3
ChrI	12068467	12068622	1,2,3
ChrI	12126673	12127431	1,2,3
ChrI	12129025	12129823	1,2,3
ChrI	12141176	12141709	1,2,3
ChrI	12142560	12143086	1,2,3
ChrI	12152579	12155025	1,2,3
ChrI	12156099	12156585	1,2,3
ChrI	12157391	12158391	1,2,3
ChrI	12159172	12162517	1,2,3
ChrI	12163332	12168857	1,2,3
ChrI	12170612	12170965	1,2,3
ChrI	12172233	12173413	1,2,3
ChrI	12175508	12179377	1,2,3
ChrI	12181879	12182465	1,2,3
ChrI	12184968	12185162	1,2,3
ChrI	12185958	12189452	1,2,3
ChrI	12199810	12200571	1,2,3
ChrI	12201373	12206548	1,2,3
ChrI	12212030	12212858	1,2,3
ChrI	12216664	12216775	1,2,3
ChrI	12221771	12222377	1,2,3
ChrI	12226940	12227843	1,2,3
ChrI	12232637	12233430	1,2,3
ChrI	12260953	12261935	1,2,3
ChrI	12284476	12284538	1,2,3
ChrI	12285785	12286705	1,2,3
ChrI	12289649	12290008	1,2,3
ChrI	12290971	12291953	1,2,3
ChrI	12292851	12293555	1,2,3
ChrI	12296686	12297551	1,2,3
ChrI	12308930	12310492	1,2,3
ChrI	12347994	12349839	1,2,3
ChrI	12406587	12407255	1,2,3
ChrI	12409806	12410681	1,2,3
ChrI	12415140	12417128	1,2,3
ChrI	12418962	12427025	1,2,3
ChrI	12428375	12429664	1,2,3
ChrI	12433868	12434666	1,2,3
ChrI	12501215	12501357	1,2,3
ChrI	12519300	12519506	1,2,3
ChrI	12541973	12542453	1,2,3
ChrI	12554762	12555028	1,2,3
ChrI	12555897	12557055	1,2,3
ChrI	12560266	12560561	1,2,3
ChrI	12561650	12565625	1,2,3
ChrI	12567687	12567909	1,2,3
ChrI	12595684	12599886	1,2,3
ChrI	12605109	12607562	1,2,3
ChrI	12609428	12609963	1,2,3
ChrI	12610995	12611883	1,2,3
ChrI	12612736	12614521	1,2,3
ChrI	12615900	12619765	1,2,3
ChrI	12627581	12628916	1,2,3
ChrI	12649004	12649785	1,2,3
ChrI	12654192	12658676	1,2,3
ChrI	12659593	12660596	1,2,3
ChrI	12663952	12665149	1,2,3
ChrI	12666199	12667892	1,2,3
ChrI	12677791	12679787	1,2,3
ChrI	12688613	12693740	1,2,3
ChrI	12702137	12704862	1,2,3
ChrI	12731321	12732731	1,2,3
ChrI	12733680	12734236	1,2,3
ChrI	12750367	12750531	1,2,3
ChrI	12751716	12755263	1,2,3
ChrI	12766172	12767260	1,2,3
ChrI	12768199	12768343	1,2,3
ChrI	12770359	12772303	1,2,3
ChrI	12774515	12776768	1,2,3
ChrI	12780261	12781433	1,2,3
ChrI	12783286	12783739	1,2,3
ChrI	12788145	12788854	1,2,3
ChrI	12789950	12791220	1,2,3
ChrI	12793104	12794313	1,2,3
ChrI	12809929	12813424	1,2,3
ChrI	12816243	12817276	1,2,3
ChrI	12823247	12824087	1,2,3
ChrI	12836965	12837740	1,2,3
ChrI	12845904	12848119	1,2,3
ChrI	12855459	12856191	1,2,3
ChrI	12859330	12861665	1,2,3
ChrI	12864512	12864870	1,2,3
ChrI	12868577	12868915	1,2,3
ChrI	12870042	12870249	1,2,3
ChrI	12875077	12880760	1,2,3
ChrI	12899072	12901185	1,2,3
ChrI	12903506	12903794	1,2,3
ChrI	12930272	12931068	1,2,3
ChrI	12942907	12944574	1,2,3
ChrI	12947340	12948210	1,2,3
ChrI	12951677	12951954	1,2,3
ChrI	12953037	12954281	1,2,3
ChrI	12955127	12955573	1,2,3
ChrI	12956908	12957195	1,2,3
ChrI	12969678	12972338	1,2,3
ChrI	12974980	12976132	1,2,3
ChrI	12981623	12982003	1,2,3
ChrI	12998602	13000160	1,2,3
ChrI	13001491	13003594	1,2,3
ChrI	13008850	13010307	1,2,3
ChrI	13012255	13014892	1,2,3
ChrI	13022786	13023041	1,2,3
ChrI	13052117	13052917	1,2,3
ChrI	13054046	13055080	1,2,3
ChrI	13071275	13071416	1,2,3
ChrI	13076804	13079880	1,2,3
ChrI	13081164	13081915	1,2,3
ChrI	13089997	13091343	1,2,3
ChrI	13092637	13093056	1,2,3
ChrI	13096876	13097599	1,2,3
ChrI	13099276	13101664	1,2,3
ChrI	13102856	13103390	1,2,3
ChrI	13115975	13119255	1,2,3
ChrI	13122003	13122352	1,2,3
ChrI	13129163	13130265	1,2,3
ChrI	13152512	13152970	1,2,3
ChrI	13154068	13158272	1,2,3
ChrI	13185578	13185969	1,2,3
ChrI	13187757	13189581	1,2,3
ChrI	13193393	13194336	1,2,3
ChrI	13221833	13223791	1,2,3
ChrI	13225581	13226119	1,2,3
ChrI	13236455	13237587	1,2,3
ChrI	13243908	13244453	1,2,3
ChrI	13255944	13256034	1,2,3
ChrI	13279742	13281290	1,2,3
ChrI	13282143	13284039	1,2,3
ChrI	13284941	13285134	1,2,3
ChrI	13290727	13293749	1,2,3
ChrI	13316307	13318632	1,2,3
ChrI	13320068	13320898	1,2,3
ChrI	13322941	13323370	1,2,3
ChrI	13337156	13337552	1,2,3
ChrI	13360074	13362619	1,2,3
ChrI	13363478	13366155	1,2,3
ChrI	13371255	13376957	1,2,3
ChrI	13381895	13386519	1,2,3
ChrI	13390918	13391534	1,2,3
ChrI	13394552	13395223	1,2,3
ChrI	13398144	13398744	1,2,3
ChrI	13401550	13402019	1,2,3
ChrI	13404314	13404733	1,2,3
ChrI	13424090	13426016	1,2,3
ChrI	13430075	13430904	1,2,3
ChrI	13434276	13436506	1,2,3
ChrI	13438422	13438700	1,2,3
ChrI	13464372	13464714	1,2,3
ChrI	13467698	13469442	1,2,3
ChrI	13470517	13470608	1,2,3
ChrI	13474498	13475359	1,2,3
ChrI	13476153	13476219	1,2,3
ChrI	13481416	13481759	1,2,3
ChrI	13499715	13501983	1,2,3
ChrI	13573545	13575633	1,2,3
ChrI	13594209	13594330	1,2,3
ChrI	13595689	13599294	1,2,3
ChrI	13618388	13619803	1,2,3
ChrI	13660897	13661376	1,2,3
ChrI	13704910	13705649	1,2,3
ChrI	13747453	13748122	1,2,3
ChrI	13777002	13777640	1,2,3
ChrI	13844847	13845888	1,2,3
ChrI	13929936	13930244	1,2,3
ChrI	13963913	13964784	1,2,3
ChrI	14011509	14013062	1,2,3
ChrI	14056708	14057077	1,2,3
ChrI	14095309	14095678	1,2,3
ChrI	14139349	14139742	1,2,3
ChrI	14173989	14174704	1,2,3
ChrI	14175785	14177276	1,2,3
ChrI	14181180	14182485	1,2,3
ChrI	14190838	14192379	1,2,3
ChrI	14380452	14380743	1,2,3
ChrI	14397508	14398227	1,2,3
ChrI	14417924	14418487	1,2,3
ChrI	14470903	14471319	1,2,3
ChrI	14491428	14492365	1,2,3
ChrI	14494114	14496315	1,2,3
ChrI	14533306	14539248	1,2,3
ChrI	14540176	14540397	1,2,3
ChrI	14570347	14571565	1,2,3
ChrI	14671071	14672510	1,2,3
ChrI	14729778	14731718	1,2,3
ChrI	14770423	14770749	1,2,3
ChrI	14838928	14839736	1,2,3
ChrI	14868942	14869134	1,2,3
ChrI	14897125	14898043	1,2,3
ChrI	14935047	14935463	1,2,3
ChrI	14943873	14944444	1,2,3
ChrI	14986799	14991044	1,2,3
ChrI	15001205	15001697	1,2,3
ChrI	15051246	15052910	1,2,3
ChrI	15054017	15055303	1,2,3
ChrI	15126750	15129358	1,2,3
ChrI	15130974	15131240	1,2,3
ChrI	15140424	15142821	1,2,3
ChrI	15209186	15210621	1,2,3
ChrI	15218542	15219004	1,2,3
ChrI	15264669	15265017	1,2,3
ChrI	15305705	15306716	1,2,3
ChrI	15350728	15352468	1,2,3
ChrI	15355749	15356507	1,2,3
ChrI	15380913	15381528	1,2,3
ChrI	15678635	15678918	1,2,3
ChrI	15696410	15696590	1,2,3
ChrI	16092429	16092891	1,2,3
ChrI	16190440	16190503	1,2,3
ChrI	16259673	16260582	1,2,3
ChrI	16308525	16313993	1,2,3
ChrI	16323785	16324251	1,2,3
ChrI	16348666	16349062	1,2,3
ChrI	16384377	16391237	1,2,3
ChrI	16423161	16423554	1,2,3
ChrI	16437479	16443328	1,2,3
ChrI	16498511	16501013	1,2,3
ChrI	16505966	16507052	1,2,3
ChrI	16735228	16737286	1,2,3
ChrI	16780363	16781223	1,2,3
ChrI	16795812	16797411	1,2,3
ChrI	16807682	16807992	1,2,3
ChrI	16811411	16812210	1,2,3
ChrI	16820963	16821320	1,2,3
ChrI	16822110	16825256	1,2,3
ChrI	16828004	16829832	1,2,3
ChrI	16831713	16833259	1,2,3
ChrI	16834984	16835725	1,2,3
ChrI	16836618	16838028	1,2,3
ChrI	16840333	16841161	1,2,3
ChrI	16848675	16849140	1,2,3
ChrI	16872810	16873933	1,2,3
ChrI	16874745	16874777	1,2,3
ChrI	16948913	16949605	1,2,3
ChrI	16987348	16989176	1,2,3
ChrI	17165820	17166265	1,2,3
ChrI	17167755	17171163	1,2,3
ChrI	17208713	17209392	1,2,3
ChrI	17421392	17421655	1,2,3
ChrI	17434196	17435199	1,2,3
ChrI	17492002	17494181	1,2,3
ChrI	17514886	17515193	1,2,3
ChrI	17525663	17526315	1,2,3
ChrI	17536445	17537026	1,2,3
ChrI	17548860	17549961	1,2,3
ChrI	17566062	17567757	1,2,3
ChrI	17583374	17584371	1,2,3
ChrI	17586494	17587109	1,2,3
ChrI	17589468	17589893	1,2,3
ChrI	17605292	17606277	1,2,3
ChrI	17640088	17642940	1,2,3
ChrI	17643867	17645882	1,2,3
ChrI	17887476	17889847	1,2,3
ChrI	17990879	17991263	1,2,3
ChrI	17992257	17993164	1,2,3
ChrI	18020820	18022276	1,2,3
ChrI	18077342	18077701	1,2,3
ChrI	18088732	18089587	1,2,3
ChrI	18091393	18092158	1,2,3
ChrI	18093378	18094118	1,2,3
ChrI	18126340	18126671	1,2,3
ChrI	18148719	18149609	1,2,3
ChrI	18155600	18156943	1,2,3
ChrI	18162302	18162943	1,2,3
ChrI	18193086	18194144	1,2,3
ChrI	18230519	18231121	1,2,3
ChrI	18235715	18236361	1,2,3
ChrI	18240336	18242408	1,2,3
ChrI	18402062	18402393	1,2,3
ChrI	18437300	18437459	1,2,3
ChrI	18440945	18441483	1,2,3
ChrI	18461773	18464692	1,2,3
ChrI	18487755	18488596	1,2,3
ChrI	18490371	18490920	1,2,3
ChrI	18495002	18495430	1,2,3
ChrI	18505769	18507740	1,2,3
ChrI	18579937	18581729	1,2,3
ChrI	18640662	18642892	1,2,3
ChrI	18673722	18675208	1,2,3
ChrI	18733783	18733860	1,2,3
ChrI	18911490	18911499	1,2,3
ChrI	18912280	18912663	1,2,3
ChrI	18928378	18929376	1,2,3
ChrI	18965511	18966967	1,2,3
ChrI	19445035	19445750	1,2,3
ChrI	19487372	19488504	1,2,3
ChrI	19491617	19492049	1,2,3
ChrI	19499966	19501193	1,2,3
ChrI	19548816	19549463	1,2,3
ChrI	19551977	19552646	1,2,3
ChrI	19583758	19583869	1,2,3
ChrI	19612110	19612410	1,2,3
ChrI	19634730	19635021	1,2,3
ChrI	19790035	19790086	1,2,3
ChrI	19834020	19838084	1,2,3
ChrI	19840666	19841631	1,2,3
ChrI	19870155	19872260	1,2,3
ChrI	19875026	19876312	1,2,3
ChrI	19912511	19915084	1,2,3
ChrI	19916019	19916261	1,2,3
ChrI	19936679	19936793	1,2,3
ChrI	19959924	19960235	1,2,3
ChrI	19983624	19984269	1,2,3
ChrI	19989138	19989448	1,2,3
ChrI	20010634	20012815	1,2,3
ChrI	20213723	20214247	1,2,3
ChrI	20297578	20298423	1,2,3
ChrI	20301220	20301547	1,2,3
ChrI	20376755	20377077	1,2,3
ChrI	20405017	20406857	1,2,3
ChrI	20437031	20437466	1,2,3
ChrI	20533665	20533914	1,2,3
ChrI	20676873	20678665	1,2,3
ChrI	20822554	20825430	1,2,3
ChrI	20827056	20827899	1,2,3
ChrI	20829031	20829340	1,2,3
ChrI	20865089	20865668	1,2,3
ChrI	20867200	20867368	1,2,3
ChrI	20884622	20885502	1,2,3
ChrI	20901242	20903424	1,2,3
ChrI	20910695	20914313	1,2,3
ChrI	20973650	20974607	1,2,3
ChrI	20996474	20996670	1,2,3
ChrI	21002804	21005867	1,2,3
ChrI	21070353	21071076	1,2,3
ChrI	21102011	21103202	1,2,3
ChrI	21128918	21129874	1,2,3
ChrI	21136451	21136706	1,2,3
ChrI	21153111	21154756	1,2,3
ChrI	21168001	21169579	1,2,3
ChrI	21170681	21171865	1,2,3
ChrI	21174089	21174560	1,2,3
ChrI	21208940	21209667	1,2,3
ChrI	21230701	21232155	1,2,3
ChrI	21232951	21234271	1,2,3
ChrI	21237226	21243485	1,2,3
ChrI	21246324	21247348	1,2,3
ChrI	21248173	21248480	1,2,3
ChrI	21259350	21263646	1,2,3
ChrI	21271921	21274067	1,2,3
ChrI	21285426	21286485	1,2,3
ChrI	21292605	21292827	1,2,3
ChrI	21302720	21303695	1,2,3
ChrI	21311531	21312896	1,2,3
ChrI	21451665	21451810	1,2,3
ChrI	21492422	21493095	1,2,3
ChrI	21598549	21603664	1,2,3
ChrI	21659322	21660584	1,2,3
ChrI	21706183	21707632	1,2,3
ChrI	21754107	21755163	1,2,3
ChrI	21796138	21798038	1,2,3
ChrI	21824679	21825472	1,2,3
ChrI	21865539	21865825	1,2,3
ChrI	21873625	21874112	1,2,3
ChrI	21875059	21875274	1,2,3
ChrI	21954696	21955456	1,2,3
ChrI	21973168	21974248	1,2,3
ChrI	22044184	22044464	1,2,3
ChrI	22052665	22055934	1,2,3
ChrI	22286411	22286504	1,2,3
ChrI	22478517	22478953	1,2,3
ChrI	22519029	22519573	1,2,3
ChrI	22521482	22521732	1,2,3
ChrI	22803753	22803973	1,2,3
ChrI	22816374	22817436	1,2,3
ChrI	22822888	22824167	1,2,3
ChrI	22932123	22933343	1,2,3
ChrI	22954438	22954884	1,2,3
ChrI	23042213	23042827	1,2,3
ChrI	23059533	23060472	1,2,3
ChrI	23137037	23138680	1,2,3
ChrI	23313542	23314753	1,2,3
ChrI	23325367	23325855	1,2,3
ChrI	23335644	23336203	1,2,3
ChrI	23338016	23338685	1,2,3
ChrI	23390075	23390452	1,2,3
ChrI	23394328	23398354	1,2,3
ChrI	23400032	23400930	1,2,3
ChrI	23404102	23404973	1,2,3
ChrI	23444352	23445633	1,2,3
ChrI	23532711	23533987	1,2,3
ChrI	23588943	23589631	1,2,3
ChrI	23620744	23621054	1,2,3
ChrI	23716979	23718830	1,2,3
ChrI	23721497	23721927	1,2,3
ChrI	23751412	23755251	1,2,3
ChrI	23825194	23825809	1,2,3
ChrI	24142149	24142323	1,2,3
ChrI	24230110	24231356	1,2,3
ChrI	24232299	24234070	1,2,3
ChrI	24241089	24241299	1,2,3
ChrI	24242191	24242660	1,2,3
ChrI	24289129	24290263	1,2,3
ChrI	24295319	24298620	1,2,3
ChrI	24626030	24626648	1,2,3
ChrI	24637169	24637851	1,2,3
ChrI	24721352	24725885	1,2,3
ChrI	24728765	24729757	1,2,3
ChrI	24797821	24798085	1,2,3
ChrI	24811695	24811771	1,2,3
ChrI	24812939	24813709	1,2,3
ChrI	24816069	24816446	1,2,3
ChrI	24854798	24855434	1,2,3
ChrI	24954400	24954621	1,2,3
ChrI	24960444	24961753	1,2,3
ChrI	24962688	24965071	1,2,3
ChrI	24965869	24969138	1,2,3
ChrI	24984227	24984682	1,2,3
ChrI	25031875	25032713	1,2,3
ChrI	25037180	25037543	1,2,3
ChrI	25041598	25042376	1,2,3
ChrI	25159368	25161234	1,2,3
ChrI	25245325	25245628	1,2,3
ChrI	25260015	25260858	1,2,3
ChrI	25396114	25396246	1,2,3
ChrI	25488640	25490169	1,2,3
ChrI	25579043	25579815	1,2,3
ChrI	25637950	25638449	1,2,3
ChrI	25714168	25715364	1,2,3
ChrI	25725616	25729523	1,2,3
ChrI	25742916	25745091	1,2,3
ChrI	25923555	25923645	1,2,3
ChrI	25925883	25926780	1,2,3
ChrI	25938096	25938623	1,2,3
ChrI	26123149	26124606	1,2,3
ChrI	26165782	26166278	1,2,3
ChrI	26179599	26180248	1,2,3
ChrI	26187598	26188310	1,2,3
ChrI	26189408	26191177	1,2,3
ChrI	26192114	26192884	1,2,3
ChrI	26193677	26198502	1,2,3
ChrI	26206137	26206591	1,2,3
ChrI	26247065	26251033	1,2,3
ChrI	26252762	26252970	1,2,3
ChrI	26269116	26270158	1,2,3
ChrI	26282364	26283543	1,2,3
ChrI	26354092	26354740	1,2,3
ChrI	26357341	26357693	1,2,3
ChrI	26393362	26395527	1,2,3
ChrI	26440297	26441793	1,2,3
ChrI	26466121	26471806	1,2,3
ChrI	26483149	26483871	1,2,3
ChrI	26491985	26492252	1,2,3
ChrI	26493037	26493444	1,2,3
ChrI	26508935	26509373	1,2,3
ChrI	26510730	26511042	1,2,3
ChrI	26521531	26521725	1,2,3
ChrI	26599037	26600938	1,2,3
ChrI	26658014	26658373	1,2,3
ChrI	26686356	26687176	1,2,3
ChrI	26699743	26700623	1,2,3
ChrI	26735449	26744830	1,2,3
ChrI	26760940	26761263	1,2,3
ChrI	26787619	26788231	1,2,3
ChrI	26809865	26810484	1,2,3
ChrI	26841103	26842272	1,2,3
ChrI	26854882	26857586	1,2,3
ChrI	26865095	26865357	1,2,3
ChrI	26875589	26876046	1,2,3
ChrI	26889224	26890709	1,2,3
ChrI	26909746	26911255	1,2,3
ChrI	26916030	26916228	1,2,3
ChrI	26920868	26924542	1,2,3
ChrI	26935470	26936185	1,2,3
ChrI	26947226	26950130	1,2,3
ChrI	26953303	26954255	1,2,3
ChrI	26956648	26959405	1,2,3
ChrI	26960591	26961051	1,2,3
ChrI	26985045	26985509	1,2,3
ChrI	26995427	26996038	1,2,3
ChrI	27021960	27022535	1,2,3
ChrI	27031786	27032330	1,2,3
ChrI	27036683	27036894	1,2,3
ChrI	27063208	27065624	1,2,3
ChrI	27089471	27092020	1,2,3
ChrI	27095143	27098189	1,2,3
ChrI	27116244	27119498	1,2,3
ChrI	27124811	27128498	1,2,3
ChrI	27160408	27163442	1,2,3
ChrI	27179170	27179573	1,2,3
ChrI	27180531	27186695	1,2,3
ChrI	27199015	27203142	1,2,3
ChrI	27204707	27206655	1,2,3
ChrI	27207980	27208938	1,2,3
ChrI	27228096	27228969	1,2,3
ChrI	27229986	27230672	1,2,3
ChrI	27235597	27237747	1,2,3
ChrI	27238911	27239607	1,2,3
ChrI	27269487	27269712	1,2,3
ChrI	27423783	27424986	1,2,3
ChrI	27439979	27442863	1,2,3
ChrI	27463023	27464280	1,2,3
ChrI	27526366	27527756	1,2,3
ChrI	27528926	27529990	1,2,3
ChrI	27558108	27559376	1,2,3
ChrI	27607354	27608757	1,2,3
ChrI	27676938	27677760	1,2,3
ChrI	27786714	27787818	1,2,3
ChrI	27790190	27792383	1,2,3
ChrI	27823280	27825663	1,2,3
ChrI	27861969	27863761	1,2,3
ChrI	27864615	27865061	1,2,3
ChrI	27868405	27868845	1,2,3
ChrI	27886296	27887028	1,2,3
ChrI	27898809	27899494	1,2,3
ChrI	27963407	27965492	1,2,3
ChrI	28033239	28033333	1,2,3
ChrI	28037613	28039201	1,2,3
ChrI	28048400	28048803	1,2,3
ChrI	28051926	28052821	1,2,3
ChrI	28054199	28054314	1,2,3
ChrI	28079954	28080041	1,2,3
ChrI	28088057	28089628	1,2,3
ChrI	28090883	28091330	1,2,3
ChrI	28098069	28098366	1,2,3
ChrI	28124262	28124411	1,2,3
ChrI	28125330	28126003	1,2,3
ChrI	28156656	28157254	1,2,3
ChrI	28167358	28168452	1,2,3
ChrI	28183919	28184137	1,2,3
ChrI	28186209	28187330	1,2,3
ChrI	28287773	28288226	1,2,3
ChrI	28311768	28312872	1,2,3
ChrI	28315006	28316202	1,2,3
ChrI	28483126	28483669	1,2,3
ChrI	28491540	28491744	1,2,3
ChrI	28508267	28509220	1,2,3
ChrI	28514583	28519044	1,2,3
ChrI	28528618	28528919	1,2,3
ChrI	28533209	28535933	1,2,3
ChrI	28548365	28553378	1,2,3
ChrI	28557465	28557702	1,2,3
ChrI	28577351	28577595	1,2,3
ChrI	28651418	28652408	1,2,3
ChrI	28653364	28655762	1,2,3
ChrI	28693375	28696938	1,2,3
ChrI	28707139	28708146	1,2,3
ChrI	28709251	28709602	1,2,3
ChrI	28724374	28725240	1,2,3
ChrI	28801036	28801222	1,2,3
ChrI	28859239	28859473	1,2,3
ChrI	28958996	28959703	1,2,3
ChrI	29039007	29039185	1,2,3
ChrI	29040089	29042754	1,2,3
ChrI	29047872	29049904	1,2,3
ChrI	29074561	29076567	1,2,3
ChrI	29159385	29161006	1,2,3
ChrI	29166207	29167554	1,2,3
ChrI	29171544	29171999	1,2,3
ChrI	29179820	29180675	1,2,3
ChrI	29193222	29194224	1,2,3
ChrI	29198947	29199751	1,2,3
ChrI	29233628	29236065	1,2,3
ChrI	29237458	29237613	1,2,3
ChrI	29238497	29239230	1,2,3
ChrI	29285601	29286316	1,2,3
ChrI	29287367	29289219	1,2,3
ChrI	29327617	29327880	1,2,3
ChrI	29393837	29396415	1,2,3
ChrI	29409677	29412579	1,2,3
ChrI	29413672	29414391	1,2,3
ChrI	29415345	29420771	1,2,3
ChrI	29425846	29426613	1,2,3
ChrI	29429570	29431662	1,2,3
ChrI	29432463	29433659	1,2,3
ChrI	29437737	29445079	1,2,3
ChrI	29449309	29449717	1,2,3
ChrI	29453743	29454337	1,2,3
ChrI	29457942	29461295	1,2,3
ChrI	29469000	29469319	1,2,3
ChrI	29473904	29474167	1,2,3
ChrI	29475032	29475212	1,2,3
ChrI	29481339	29482365	1,2,3
ChrI	29484466	29485540	1,2,3
ChrI	29488553	29488823	1,2,3
ChrI	29490741	29492193	1,2,3
ChrI	29494348	29495153	1,2,3
ChrI	29506210	29506564	1,2,3
ChrI	29525448	29529915	1,2,3
ChrI	29534623	29534871	1,2,3
ChrI	29573412	29574914	1,2,3
ChrI	29576900	29577702	1,2,3
ChrI	29582098	29582718	1,2,3
ChrI	29606279	29607075	1,2,3
ChrI	29663219	29664012	1,2,3
ChrI	29668346	29668462	1,2,3
ChrI	29675278	29680220	1,2,3
ChrI	29685823	29686359	1,2,3
ChrI	29691106	29692104	1,2,3
ChrI	29692997	29694937	1,2,3
ChrI	29696393	29696457	1,2,3
ChrI	29698885	29699930	1,2,3
ChrI	29740365	29741147	1,2,3
ChrI	29742954	29743729	1,2,3
ChrI	29752879	29753279	1,2,3
ChrI	29757489	29758378	1,2,3
ChrI	29761699	29761978	1,2,3
ChrI	29764896	29766565	1,2,3
ChrI	29767567	29769141	1,2,3
ChrI	29770143	29771906	1,2,3
ChrI	29796922	29797740	1,2,3
ChrI	29845741	29847299	1,2,3
ChrI	29869437	29869625	1,2,3
ChrI	29874377	29874978	1,2,3
ChrI	29880361	29883017	1,2,3
ChrI	29886220	29887310	1,2,3
ChrI	29888149	29888447	1,2,3
ChrI	29904948	29905539	1,2,3
ChrI	29927483	29928588	1,2,3
ChrI	29936206	29936237	1,2,3
ChrI	29939794	29940859	1,2,3
ChrI	29944001	29944609	1,2,3
ChrI	29945758	29946443	1,2,3
ChrI	29948548	29950309	1,2,3
ChrI	29982865	29986621	1,2,3
ChrI	29987751	29988375	1,2,3
ChrI	30000377	30001247	1,2,3
ChrI	30006662	30007656	1,2,3
ChrI	30022575	30025108	1,2,3
ChrI	30028818	30031364	1,2,3
ChrI	30061878	30062009	1,2,3
ChrI	30070164	30071081	1,2,3
ChrI	30108660	30109347	1,2,3
ChrI	30128073	30128953	1,2,3
ChrI	30132127	30136252	1,2,3
ChrI	30137086	30139046	1,2,3
ChrI	30158190	30158384	1,2,3
ChrI	30169303	30169732	1,2,3
ChrI	30173698	30173718	1,2,3
ChrI	30174545	30175820	1,2,3
ChrI	30197678	30199333	1,2,3
ChrI	30200349	30207156	1,2,3
ChrI	30207955	30208182	1,2,3
ChrI	30228536	30230985	1,2,3
ChrI	30234602	30241480	1,2,3
ChrI	30260601	30261357	1,2,3
ChrI	30268872	30270110	1,2,3
ChrI	30282533	30282990	1,2,3
ChrI	30286880	30287358	1,2,3
ChrI	30291654	30291953	1,2,3
ChrI	30294516	30294761	1,2,3
ChrI	30295648	30297468	1,2,3
ChrI	30302731	30305247	1,2,3
ChrI	30306157	30306367	1,2,3
ChrI	30337956	30338216	1,2,3
ChrI	30342639	30343093	1,2,3
ChrI	30346943	30347163	1,2,3
ChrI	30348227	30350300	1,2,3
ChrI	30377672	30378755	1,2,3
ChrI	30381784	30383912	1,2,3
ChrI	30392368	30396687	1,2,3
ChrI	30401209	30401624	1,2,3
ChrI	30430594	30431107	1,2,3
ChrI	30462639	30463980	1,2,3
ChrI	30466791	30466924	1,2,3
ChrI	30479986	30480211	1,2,3
ChrI	30524165	30525361	1,2,3
ChrI	30528345	30528754	1,2,3
ChrI	30570690	30571578	1,2,3
ChrI	30608546	30609944	1,2,3
ChrI	30614187	30614506	1,2,3
ChrI	30620179	30620814	1,2,3
ChrI	30622013	30623930	1,2,3
ChrI	30626834	30627103	1,2,3
ChrI	30632376	30633462	1,2,3
ChrI	30646084	30646776	1,2,3
ChrI	30663145	30664510	1,2,3
ChrI	30672187	30675617	1,2,3
ChrI	30698934	30699235	1,2,3
ChrI	30700104	30701070	1,2,3
ChrI	30702246	30703223	1,2,3
ChrI	30706658	30706871	1,2,3
ChrI	30708743	30709426	1,2,3
ChrI	30714980	30718811	1,2,3
ChrI	30762926	30765380	1,2,3
ChrI	30773038	30775797	1,2,3
ChrI	30794362	30796705	1,2,3
ChrI	30810848	30810977	1,2,3
ChrI	30827104	30828211	1,2,3
ChrI	30851597	30852398	1,2,3
ChrI	30872745	30873853	1,2,3
ChrI	30874738	30875907	1,2,3
ChrI	30895294	30896197	1,2,3
ChrI	30906285	30907189	1,2,3
ChrI	30908188	30913581	1,2,3
ChrI	30937576	30939689	1,2,3
ChrI	30952354	30953382	1,2,3
ChrI	30955578	30957136	1,2,3
ChrI	30984681	30984691	1,2,3
ChrI	30992270	30993127	1,2,3
ChrI	30994195	30995719	1,2,3
ChrI	30996914	31002489	1,2,3
ChrI	31010334	31012844	1,2,3
ChrI	31052918	31053466	1,2,3
ChrI	31058490	31059967	1,2,3
ChrI	31062504	31063325	1,2,3
ChrI	31065805	31066871	1,2,3
ChrI	31079761	31083894	1,2,3
ChrI	31087719	31089625	1,2,3
ChrI	31094893	31095164	1,2,3
ChrI	31107130	31107248	1,2,3
ChrI	31112744	31114974	1,2,3
ChrI	31121271	31125833	1,2,3
ChrI	31134040	31134817	1,2,3
ChrI	31145268	31145699	1,2,3
ChrI	31154549	31154713	1,2,3
ChrI	31159392	31159646	1,2,3
ChrI	31206589	31206837	1,2,3
ChrI	31210428	31210848	1,2,3
ChrI	31213260	31213426	1,2,3
ChrI	31214291	31215005	1,2,3
ChrI	31262635	31263270	1,2,3
ChrI	31269086	31269573	1,2,3
ChrI	31272303	31273401	1,2,3
ChrI	31286455	31287313	1,2,3
ChrI	31289629	31291043	1,2,3
ChrI	31295669	31296453	1,2,3
ChrI	31303489	31304406	1,2,3
ChrI	31306651	31306915	1,2,3
ChrI	31310408	31311751	1,2,3
ChrI	31326625	31331120	1,2,3
ChrI	31332356	31332851	1,2,3
ChrI	31335637	31336719	1,2,3
ChrI	31361566	31362521	1,2,3
ChrI	31368071	31369103	1,2,3
ChrI	31400108	31401558	1,2,3
ChrI	31415243	31415465	1,2,3
ChrI	31418152	31421524	1,2,3
ChrI	31425277	31425724	1,2,3
ChrI	31458602	31459182	1,2,3
ChrI	31471396	31475545	1,2,3
ChrI	31477045	31478219	1,2,3
ChrI	31480573	31487791	1,2,3
ChrI	31541971	31545430	1,2,3
ChrI	31546316	31549248	1,2,3
ChrI	31551192	31554694	1,2,3
ChrI	31589311	31595496	1,2,3
ChrI	31597141	31599841	1,2,3
ChrI	31600744	31601167	1,2,3
ChrI	31604889	31606659	1,2,3
ChrI	31610799	31611304	1,2,3
ChrI	31628830	31629076	1,2,3
ChrI	31635880	31642281	1,2,3
ChrI	31645479	31646021	1,2,3
ChrI	31655964	31656037	1,2,3
ChrI	31659120	31662445	1,2,3
ChrI	31663709	31664680	1,2,3
ChrI	31666386	31669376	1,2,3
ChrI	31683140	31683205	1,2,3
ChrI	31724379	31725292	1,2,3
ChrI	31726614	31727433	1,2,3
ChrI	31731353	31731758	1,2,3
ChrI	31745333	31746799	1,2,3
ChrI	31747778	31750129	1,2,3
ChrI	31757102	31759192	1,2,3
ChrI	31760320	31764390	1,2,3
ChrI	31784226	31784910	1,2,3
ChrI	31816556	31817938	1,2,3
ChrI	31819457	31821225	1,2,3
ChrI	31842840	31843282	1,2,3
ChrI	31844364	31848348	1,2,3
ChrI	31871446	31872627	1,2,3
ChrI	31873589	31875046	1,2,3
ChrI	31875963	31877893	1,2,3
ChrI	31879525	31880553	1,2,3
ChrI	31881652	31881840	1,2,3
ChrI	31893175	31894773	1,2,3
ChrI	31908994	31909436	1,2,3
ChrI	31918895	31928178	1,2,3
ChrI	31933209	31933418	1,2,3
ChrI	31938570	31948263	1,2,3
ChrI	31954901	31956967	1,2,3
ChrI	31959264	31959967	1,2,3
ChrI	31965662	31965789	1,2,3
ChrI	31968173	31968817	1,2,3
ChrI	31982392	31983831	1,2,3
ChrI	31991200	31991948	1,2,3
ChrI	31993482	31994379	1,2,3
ChrI	31998998	32004792	1,2,3
ChrI	32006131	32006375	1,2,3
ChrI	32007605	32008396	1,2,3
ChrI	32010411	32010635	1,2,3
ChrI	32014882	32015108	1,2,3
ChrI	32021189	32021365	1,2,3
ChrI	32022551	32028714	1,2,3
ChrI	32036298	32038127	1,2,3
ChrI	32048899	32051086	1,2,3
ChrI	32053781	32055031	1,2,3
ChrI	32058233	32062681	1,2,3
ChrI	32064142	32068263	1,2,3
ChrI	32070732	32075254	1,2,3
ChrI	32077705	32079427	1,2,3
ChrI	32081470	32083268	1,2,3
ChrI	32093992	32096097	1,2,3
ChrI	32105464	32105560	1,2,3
ChrI	32108299	32108794	1,2,3
ChrI	32112742	32116824	1,2,3
ChrI	32120880	32121165	1,2,3
ChrI	32121980	32123851	1,2,3
ChrI	32127896	32133711	1,2,3
ChrI	32136601	32136968	1,2,3
ChrI	32160048	32165139	1,2,3
ChrI	32217426	32218341	1,2,3
ChrI	32222365	32222645	1,2,3
ChrI	32231630	32232661	1,2,3
ChrI	32234820	32235799	1,2,3
ChrI	32236659	32238097	1,2,3
ChrI	32239015	32239077	1,2,3
ChrI	32246256	32247595	1,2,3
ChrI	32248987	32249837	1,2,3
ChrI	32260527	32262713	1,2,3
ChrI	32264694	32265037	1,2,3
ChrI	32265941	32265997	1,2,3
ChrI	32272702	32272703	1,2,3
ChrI	32274315	32275083	1,2,3
ChrI	32277417	32277588	1,2,3
ChrI	32301322	32301713	1,2,3
ChrI	32303588	32303988	1,2,3
ChrI	32306408	32306985	1,2,3
ChrI	32377089	32377950	1,2,3
ChrI	32387248	32387454	1,2,3
ChrI	32391229	32392251	1,2,3
ChrI	32393076	32394384	1,2,3
ChrI	32395771	32400951	1,2,3
ChrI	32408521	32410603	1,2,3
ChrI	32411605	32414823	1,2,3
ChrI	32415635	32416151	1,2,3
ChrI	32419035	32419344	1,2,3
ChrI	32421299	32421651	1,2,3
ChrI	32425849	32427933	1,2,3
ChrI	32467898	32468234	1,2,3
ChrI	32649493	32650253	1,2,3
ChrI	32696242	32697945	1,2,3
ChrI	32699733	32700406	1,2,3
ChrI	32705120	32707069	1,2,3
ChrI	32710718	32712170	1,2,3
ChrI	32713006	32714330	1,2,3
ChrI	32715776	32717747	1,2,3
ChrI	32743554	32743881	1,2,3
ChrI	32746640	32747405	1,2,3
ChrI	32757461	32757857	1,2,3
ChrI	32758894	32759155	1,2,3
ChrI	32766050	32766395	1,2,3
ChrI	32880180	32881147	1,2,3
ChrI	32926399	32926605	1,2,3
ChrI	32932769	32935850	1,2,3
ChrI	32939148	32939452	1,2,3
ChrI	32977989	32978022	1,2,3
ChrI	32989779	32990717	1,2,3
ChrI	32992171	32995462	1,2,3
ChrI	33003609	33004112	1,2,3
ChrI	33014619	33016138	1,2,3
ChrI	33031530	33032933	1,2,3
ChrI	33037375	33037723	1,2,3
ChrI	33046496	33047263	1,2,3
ChrI	33051412	33053248	1,2,3
ChrI	33055824	33056173	1,2,3
ChrI	33063966	33068730	1,2,3
ChrI	33185318	33187276	1,2,3
ChrI	33237376	33238078	1,2,3
ChrI	33238886	33239775	1,2,3
ChrI	33268781	33268835	1,2,3
ChrI	33270364	33270469	1,2,3
ChrI	33274419	33276591	1,2,3
ChrI	33277427	33280764	1,2,3
ChrI	33299525	33300098	1,2,3
ChrI	33304129	33305775	1,2,3
ChrI	33310027	33310136	1,2,3
ChrI	33315931	33317516	1,2,3
ChrI	33318707	33323038	1,2,3
ChrI	33334812	33337808	1,2,3
ChrI	33339474	33341994	1,2,3
ChrI	33346979	33348921	1,2,3
ChrI	33353688	33355195	1,2,3
ChrI	33376382	33377181	1,2,3
ChrI	33378950	33383481	1,2,3
ChrI	33384998	33386936	1,2,3
ChrI	33392426	33392767	1,2,3
ChrI	33402011	33403703	1,2,3
ChrI	33405567	33405879	1,2,3
ChrI	33412859	33415857	1,2,3
ChrI	33422405	33425176	1,2,3
ChrI	33428492	33429514	1,2,3
ChrI	33439602	33440342	1,2,3
ChrI	33442319	33443212	1,2,3
ChrI	33458060	33458217	1,2,3
ChrI	33469993	33470389	1,2,3
ChrI	33473683	33474524	1,2,3
ChrI	33501424	33502957	1,2,3
ChrI	33504359	33504951	1,2,3
ChrI	33508416	33509456	1,2,3
ChrI	33517074	33517572	1,2,3
ChrI	33521226	33525387	1,2,3
ChrI	33532197	33534762	1,2,3
ChrI	33535888	33536124	1,2,3
ChrI	33539827	33544018	1,2,3
ChrI	33549385	33552794	1,2,3
ChrI	33554168	33554736	1,2,3
ChrI	33556131	33556457	1,2,3
ChrI	33557934	33558690	1,2,3
ChrI	33574484	33575305	1,2,3
ChrI	33576825	33577520	1,2,3
ChrI	33580040	33585273	1,2,3
ChrI	33589071	33590004	1,2,3
ChrI	33592849	33593653	1,2,3
ChrI	33603391	33609805	1,2,3
ChrI	33631618	33633014	1,2,3
ChrI	33633844	33634402	1,2,3
ChrI	33636944	33637246	1,2,3
ChrI	33656857	33659173	1,2,3
ChrI	33664340	33665515	1,2,3
ChrI	33667051	33670504	1,2,3
ChrI	33676028	33676298	1,2,3
ChrI	33680159	33681699	1,2,3
ChrI	33690466	33690885	1,2,3
ChrI	33694312	33695504	1,2,3
ChrI	33700737	33701706	1,2,3
ChrI	33751267	33752195	1,2,3
ChrI	33758756	33760132	1,2,3
ChrI	33806929	33807558	1,2,3
ChrI	33809000	33810735	1,2,3
ChrI	33818786	33818939	1,2,3
ChrI	33820812	33823278	1,2,3
ChrI	33828635	33829888	1,2,3
ChrI	33834891	33838108	1,2,3
ChrI	33838887	33848368	1,2,3
ChrI	33849775	33850930	1,2,3
ChrI	33882688	33883847	1,2,3
ChrI	33931358	33932507	1,2,3
ChrI	33958375	33959183	1,2,3
ChrI	33961010	33961970	1,2,3
ChrI	34029277	34030184	1,2,3
ChrI	34031816	34034443	1,2,3
ChrI	34075888	34076948	1,2,3
ChrI	34085924	34087114	1,2,3
ChrI	34101421	34105980	1,2,3
ChrI	34123828	34125105	1,2,3
ChrI	34134690	34136553	1,2,3
ChrI	34205737	34206108	1,2,3
ChrI	34358639	34359025	1,2,3
ChrI	34373156	34374473	1,2,3
ChrI	34477600	34479670	1,2,3
ChrI	34488248	34488449	1,2,3
ChrI	34497363	34500359	1,2,3
ChrI	34523066	34523882	1,2,3
ChrI	34527989	34528886	1,2,3
ChrI	34535506	34535990	1,2,3
ChrI	34548271	34548482	1,2,3
ChrI	34598935	34599491	1,2,3
ChrI	34604640	34605667	1,2,3
ChrI	34617314	34618867	1,2,3
ChrI	34714315	34714699	1,2,3
ChrI	34715674	34715948	1,2,3
ChrI	34739233	34739358	1,2,3
ChrI	34770551	34774145	1,2,3
ChrI	34775544	34775866	1,2,3
ChrI	34793072	34796244	1,2,3
ChrI	34804906	34806421	1,2,3
ChrI	34807380	34808058	1,2,3
ChrI	34816663	34817331	1,2,3
ChrI	34827135	34827407	1,2,3
ChrI	34844142	34846115	1,2,3
ChrI	34985908	34990068	1,2,3
ChrI	35003561	35004047	1,2,3
ChrI	35195065	35195999	1,2,3
ChrI	35229811	35230341	1,2,3
ChrI	35244000	35245774	1,2,3
ChrI	35254389	35256545	1,2,3
ChrI	35258884	35259263	1,2,3
ChrI	35265242	35272862	1,2,3
ChrI	35359099	35360067	1,2,3
ChrI	35386203	35387109	1,2,3
ChrI	35403539	35403848	1,2,3
ChrI	35420528	35421384	1,2,3
ChrI	35428844	35428958	1,2,3
ChrI	35429945	35430420	1,2,3
ChrI	35457439	35460710	1,2,3
ChrI	35462387	35462519	1,2,3
ChrI	35473494	35473777	1,2,3
ChrI	35476883	35477707	1,2,3
ChrI	35486808	35487119	1,2,3
ChrI	35492594	35494446	1,2,3
ChrI	35495843	35500858	1,2,3
ChrI	35520861	35521382	1,2,3
ChrI	35538579	35540230	1,2,3
ChrI	35541752	35542032	1,2,3
ChrI	35551739	35553902	1,2,3
ChrI	35563905	35564654	1,2,3
ChrI	35596427	35596863	1,2,3
ChrI	35602047	35603717	1,2,3
ChrI	35607056	35607646	1,2,3
ChrI	35787503	35788740	1,2,3
ChrI	35850228	35852550	1,2,3
ChrI	35867152	35868391	1,2,3
ChrI	35869234	35875863	1,2,3
ChrI	35913598	35916443	1,2,3
ChrI	35917468	35917625	1,2,3
ChrI	35923626	35923832	1,2,3
ChrI	35925774	35926575	1,2,3
ChrI	35966167	35967501	1,2,3
ChrI	36048321	36049099	1,2,3
ChrI	36072970	36075526	1,2,3
ChrI	36076724	36077168	1,2,3
ChrI	36093257	36093734	1,2,3
ChrI	36103809	36104676	1,2,3
ChrI	36158416	36159170	1,2,3
ChrI	36165196	36165435	1,2,3
ChrI	36166253	36166417	1,2,3
ChrI	36191719	36192598	1,2,3
ChrI	36198851	36199233	1,2,3
ChrI	36237645	36237922	1,2,3
ChrI	36263160	36263409	1,2,3
ChrI	36272777	36273004	1,2,3
ChrI	36281872	36282305	1,2,3
ChrI	36311292	36312101	1,2,3
ChrI	36332233	36333930	1,2,3
ChrI	36553424	36554648	1,2,3
ChrI	36581516	36581670	1,2,3
ChrI	36641934	36642826	1,2,3
ChrI	36646625	36647043	1,2,3
ChrI	36748049	36748433	1,2,3
ChrI	36981162	36981576	1,2,3
ChrI	37064505	37064750	1,2,3
ChrI	37070484	37070866	1,2,3
ChrI	37348418	37348626	1,2,3
ChrI	37371385	37372469	1,2,3
ChrI	37402725	37403073	1,2,3
ChrI	37427718	37429667	1,2,3
ChrI	37460722	37460869	1,2,3
ChrI	37470456	37471089	1,2,3
ChrI	37674832	37675379	1,2,3
ChrI	37684581	37685059	1,2,3
ChrI	37712656	37712726	1,2,3
ChrI	37713943	37714788	1,2,3
ChrI	37728758	37729251	1,2,3
ChrI	37732807	37733939	1,2,3
ChrI	37759610	37762936	1,2,3
ChrI	37763770	37764782	1,2,3
ChrI	37786253	37787311	1,2,3
ChrI	37815943	37819498	1,2,3
ChrI	37841712	37845541	1,2,3
ChrI	37848151	37848734	1,2,3
ChrI	37850795	37850893	1,2,3
ChrI	37855165	37855816	1,2,3
ChrI	37858375	37865193	1,2,3
ChrI	37877354	37877627	1,2,3
ChrI	37897566	37899631	1,2,3
ChrI	37922327	37926515	1,2,3
ChrI	37976382	37977251	1,2,3
ChrI	37980894	37981003	1,2,3
ChrI	38062882	38063788	1,2,3
ChrI	38117134	38117451	1,2,3
ChrI	38152296	38152750	1,2,3
ChrI	38193024	38193820	1,2,3
ChrI	38217615	38217825	1,2,3
ChrI	38243583	38243875	1,2,3
ChrI	38266502	38267788	1,2,3
ChrI	38429144	38429724	1,2,3
ChrI	38445417	38446933	1,2,3
ChrI	38465295	38466051	1,2,3
ChrI	38471904	38472301	1,2,3
ChrI	38473860	38474451	1,2,3
ChrI	38708446	38708587	1,2,3
ChrI	38722504	38723081	1,2,3
ChrI	38726999	38728897	1,2,3
ChrI	38747233	38750217	1,2,3
ChrI	38758264	38758525	1,2,3
ChrI	38788522	38790506	1,2,3
ChrI	38838884	38840416	1,2,3
ChrI	38841411	38842390	1,2,3
ChrI	38860517	38861748	1,2,3
ChrI	38898054	38898518	1,2,3
ChrI	38899673	38901780	1,2,3
ChrI	38915266	38916488	1,2,3
ChrI	38954478	38956061	1,2,3
ChrI	38961156	38963062	1,2,3
ChrI	38964878	38966189	1,2,3
ChrI	38967120	38968768	1,2,3
ChrI	38988542	38989333	1,2,3
ChrI	39005017	39005500	1,2,3
ChrI	39030689	39031926	1,2,3
ChrI	39032870	39034844	1,2,3
ChrI	39044030	39049772	1,2,3
ChrI	39098006	39101459	1,2,3
ChrI	39108960	39117283	1,2,3
ChrI	39159590	39160730	1,2,3
ChrI	39173242	39175042	1,2,3
ChrI	39182662	39183583	1,2,3
ChrI	39190516	39192884	1,2,3
ChrI	39204596	39208691	1,2,3
ChrI	39217947	39225884	1,2,3
ChrI	39227419	39228308	1,2,3
ChrI	39231689	39232757	1,2,3
ChrI	39233954	39238120	1,2,3
ChrI	39240934	39241405	1,2,3
ChrI	39242241	39243206	1,2,3
ChrI	39245693	39245938	1,2,3
ChrI	39249955	39250284	1,2,3
ChrI	39255047	39256293	1,2,3
ChrI	39257297	39258004	1,2,3
ChrI	39271047	39272549	1,2,3
ChrI	39296337	39297227	1,2,3
ChrI	39300491	39301152	1,2,3
ChrI	39326747	39326884	1,2,3
ChrI	39331240	39331649	1,2,3
ChrI	39360998	39362014	1,2,3
ChrI	39367437	39370103	1,2,3
ChrI	39391542	39391865	1,2,3
ChrI	39420915	39421912	1,2,3
ChrI	39447463	39447951	1,2,3
ChrI	39454477	39455263	1,2,3
ChrI	39481862	39482229	1,2,3
ChrI	39486700	39488545	1,2,3
ChrI	39489792	39491074	1,2,3
ChrI	39503944	39504195	1,2,3
ChrI	39505695	39506270	1,2,3
ChrI	39508277	39509542	1,2,3
ChrI	39510597	39512968	1,2,3
ChrI	39520639	39521205	1,2,3
ChrI	39550638	39551182	1,2,3
ChrI	39555618	39555761	1,2,3
ChrII	817	1230	1,2,3
ChrII	4707	6355	1,2,3
ChrII	40800	41147	1,2,3
ChrII	75956	76628	1,2,3
ChrII	79373	82000	1,2,3
ChrII	83126	84005	1,2,3
ChrII	85047	86897	1,2,3
ChrII	89654	90940	1,2,3
ChrII	97200	98112	1,2,3
ChrII	119586	123007	1,2,3
ChrII	125592	125810	1,2,3
ChrII	126648	128598	1,2,3
ChrII	129518	129922	1,2,3
ChrII	134334	136431	1,2,3
ChrII	184335	184916	1,2,3
ChrII	225080	225509	1,2,3
ChrII	279403	281518	1,2,3
ChrII	312675	313323	1,2,3
ChrII	323542	325889	1,2,3
ChrII	353717	354599	1,2,3
ChrII	395035	396399	1,2,3
ChrII	411142	412334	1,2,3
ChrII	414726	416519	1,2,3
ChrII	429740	434547	1,2,3
ChrII	458134	460308	1,2,3
ChrII	461439	462603	1,2,3
ChrII	471859	472982	1,2,3
ChrII	475234	475674	1,2,3
ChrII	481613	483626	1,2,3
ChrII	484559	485110	1,2,3
ChrII	537858	538476	1,2,3
ChrII	558021	561162	1,2,3
ChrII	568902	569950	1,2,3
ChrII	583152	583729	1,2,3
ChrII	737461	737744	1,2,3
ChrII	798476	799462	1,2,3
ChrII	803682	804244	1,2,3
ChrII	807175	807568	1,2,3
ChrII	815070	816625	1,2,3
ChrII	919278	919560	1,2,3
ChrII	988884	989189	1,2,3
ChrII	1063822	1065961	1,2,3
ChrII	1073944	1075133	1,2,3
ChrII	1080293	1080371	1,2,3
ChrII	1117796	1118443	1,2,3
ChrII	1127946	1129016	1,2,3
ChrII	1195832	1196272	1,2,3
ChrII	1474872	1474973	1,2,3
ChrII	1476144	1476198	1,2,3
ChrII	1477207	1480498	1,2,3
ChrII	1481979	1482033	1,2,3
ChrII	1636510	1637322	1,2,3
ChrII	1752288	1752717	1,2,3
ChrII	1900998	1901903	1,2,3
ChrII	1932703	1932817	1,2,3
ChrII	1954032	1954494	1,2,3
ChrII	1963688	1964637	1,2,3
ChrII	2040709	2041065	1,2,3
ChrII	2122619	2123479	1,2,3
ChrII	2186908	2187371	1,2,3
ChrII	2493364	2493487	1,2,3
ChrII	2607624	2607897	1,2,3
ChrII	2627432	2628677	1,2,3
ChrII	2664305	2664883	1,2,3
ChrII	3330774	3333928	1,2,3
ChrII	3413253	3413612	1,2,3
ChrII	3419838	3421062	1,2,3
ChrII	3506121	3506808	1,2,3
ChrII	3515931	3516541	1,2,3
ChrII	3553344	3555123	1,2,3
ChrII	3572153	3572479	1,2,3
ChrII	3643107	3643846	1,2,3
ChrII	3651158	3651424	1,2,3
ChrII	3744485	3745784	1,2,3
ChrII	3758220	3758636	1,2,3
ChrII	3863222	3863384	1,2,3
ChrII	3977222	3978146	1,2,3
ChrII	4099556	4099847	1,2,3
ChrII	4412283	4412742	1,2,3
ChrII	4534889	4535152	1,2,3
ChrII	4657022	4657799	1,2,3
ChrII	4675687	4676290	1,2,3
ChrII	4829254	4829370	1,2,3
ChrII	4830876	4831206	1,2,3
ChrII	4832105	4832909	1,2,3
ChrII	4933765	4933904	1,2,3
ChrII	4996723	4997134	1,2,3
ChrII	5264840	5265063	1,2,3
ChrII	5280642	5282480	1,2,3
ChrII	5293594	5295230	1,2,3
ChrII	5575843	5576417	1,2,3
ChrII	5806624	5806701	1,2,3
ChrII	5958775	5959167	1,2,3
ChrII	6034432	6034904	1,2,3
ChrII	6044828	6045458	1,2,3
ChrII	6048031	6048325	1,2,3
ChrII	6062362	6066225	1,2,3
ChrII	6072783	6073224	1,2,3
ChrII	6136422	6137071	1,2,3
ChrII	6160755	6161612	1,2,3
ChrII	6190344	6191821	1,2,3
ChrII	6274029	6274336	1,2,3
ChrII	6284672	6286539	1,2,3
ChrII	6289825	6290149	1,2,3
ChrII	6291182	6292149	1,2,3
ChrII	6354385	6356788	1,2,3
ChrII	6378936	6379472	1,2,3
ChrII	6384387	6387189	1,2,3
ChrII	6528364	6529065	1,2,3
ChrII	6530769	6531444	1,2,3
ChrII	6533100	6533296	1,2,3
ChrII	6598504	6599122	1,2,3
ChrII	6612946	6613410	1,2,3
ChrII	6664594	6665368	1,2,3
ChrII	6676387	6677132	1,2,3
ChrII	6879589	6880002	1,2,3
ChrII	6910375	6911483	1,2,3
ChrII	6933118	6934240	1,2,3
ChrII	6942464	6943292	1,2,3
ChrII	6977341	6977427	1,2,3
ChrII	7004138	7005541	1,2,3
ChrII	7073532	7074194	1,2,3
ChrII	7189688	7191202	1,2,3
ChrII	7192219	7194362	1,2,3
ChrII	7228110	7229542	1,2,3
ChrII	7267885	7268098	1,2,3
ChrII	7269067	7272489	1,2,3
ChrII	7339218	7340676	1,2,3
ChrII	7377196	7378767	1,2,3
ChrII	7391432	7391569	1,2,3
ChrII	7398366	7399895	1,2,3
ChrII	7444398	7445859	1,2,3
ChrII	7489959	7490028	1,2,3
ChrII	7562439	7565844	1,2,3
ChrII	7578894	7579454	1,2,3
ChrII	7580895	7581361	1,2,3
ChrII	7683525	7685760	1,2,3
ChrII	7768174	7768665	1,2,3
ChrII	7783910	7784504	1,2,3
ChrII	7794288	7795361	1,2,3
ChrII	7830606	7831210	1,2,3
ChrII	7846369	7851482	1,2,3
ChrII	7858211	7860085	1,2,3
ChrII	7864829	7867366	1,2,3
ChrII	7872173	7872405	1,2,3
ChrII	7882695	7886076	1,2,3
ChrII	7891320	7894086	1,2,3
ChrII	7899265	7900083	1,2,3
ChrII	7900864	7901813	1,2,3
ChrII	7904901	7905368	1,2,3
ChrII	7916063	7921181	1,2,3
ChrII	7926626	7929213	1,2,3
ChrII	7930580	7930905	1,2,3
ChrII	7931884	7937100	1,2,3
ChrII	7942447	7943302	1,2,3
ChrII	7946504	7947934	1,2,3
ChrII	7972509	7976562	1,2,3
ChrII	8019060	8020120	1,2,3
ChrII	8027166	8028663	1,2,3
ChrII	8044281	8045861	1,2,3
ChrII	8048482	8049262	1,2,3
ChrII	8070930	8071158	1,2,3
ChrII	8089577	8089637	1,2,3
ChrII	8094258	8096024	1,2,3
ChrII	8096886	8097455	1,2,3
ChrII	8114256	8115732	1,2,3
ChrII	8138282	8138639	1,2,3
ChrII	8266709	8267418	1,2,3
ChrII	8369099	8369546	1,2,3
ChrII	8398670	8398919	1,2,3
ChrII	8400024	8406554	1,2,3
ChrII	8408358	8409518	1,2,3
ChrII	8410978	8414727	1,2,3
ChrII	8423476	8424510	1,2,3
ChrII	8426835	8433829	1,2,3
ChrII	8435232	8435872	1,2,3
ChrII	8439549	8440520	1,2,3
ChrII	8479549	8479761	1,2,3
ChrII	8481393	8483826	1,2,3
ChrII	8487263	8488651	1,2,3
ChrII	8620558	8622742	1,2,3
ChrII	8630541	8631738	1,2,3
ChrII	8636883	8638713	1,2,3
ChrII	8668499	8668862	1,2,3
ChrII	8709558	8710151	1,2,3
ChrII	8733443	8734480	1,2,3
ChrII	8743111	8745432	1,2,3
ChrII	8784877	8786426	1,2,3
ChrII	8948214	8948540	1,2,3
ChrII	8949368	8949911	1,2,3
ChrII	8972198	8973302	1,2,3
ChrII	8980850	8981152	1,2,3
ChrII	8986033	8987897	1,2,3
ChrII	8990953	8991484	1,2,3
ChrII	8995032	8995208	1,2,3
ChrII	8999212	8999608	1,2,3
ChrII	9021496	9022022	1,2,3
ChrII	9023912	9026078	1,2,3
ChrII	9055402	9055606	1,2,3
ChrII	9056611	9059691	1,2,3
ChrII	9061325	9062518	1,2,3
ChrII	9063301	9064697	1,2,3
ChrII	9066551	9069100	1,2,3
ChrII	9071057	9071434	1,2,3
ChrII	9072651	9073164	1,2,3
ChrII	9074556	9075696	1,2,3
ChrII	9079715	9086319	1,2,3
ChrII	9095421	9098215	1,2,3
ChrII	9100115	9103549	1,2,3
ChrII	9104347	9105481	1,2,3
ChrII	9111580	9112162	1,2,3
ChrII	9120121	9120815	1,2,3
ChrII	9190426	9190666	1,2,3
ChrII	9204088	9205315	1,2,3
ChrII	9206355	9206901	1,2,3
ChrII	9208704	9208914	1,2,3
ChrII	9241976	9242702	1,2,3
ChrII	9266421	9266969	1,2,3
ChrII	9270407	9271077	1,2,3
ChrII	9278601	9280156	1,2,3
ChrII	9289121	9289782	1,2,3
ChrII	9293559	9294356	1,2,3
ChrII	9372706	9372912	1,2,3
ChrII	9377856	9379712	1,2,3
ChrII	9399700	9400443	1,2,3
ChrII	9422459	9422932	1,2,3
ChrII	9429269	9430424	1,2,3
ChrII	9451285	9452182	1,2,3
ChrII	9459628	9462355	1,2,3
ChrII	9464614	9465016	1,2,3
ChrII	9466587	9467096	1,2,3
ChrII	9467964	9471452	1,2,3
ChrII	9486994	9488023	1,2,3
ChrII	9504956	9506556	1,2,3
ChrII	9509314	9510127	1,2,3
ChrII	9527241	9527616	1,2,3
ChrII	9530503	9530905	1,2,3
ChrII	9532184	9539439	1,2,3
ChrII	9548809	9559164	1,2,3
ChrII	9569614	9569663	1,2,3
ChrII	9581016	9581140	1,2,3
ChrII	9582130	9582573	1,2,3
ChrII	9595802	9596464	1,2,3
ChrII	9633786	9633917	1,2,3
ChrII	9656998	9657429	1,2,3
ChrII	9683660	9683870	1,2,3
ChrII	9684921	9686415	1,2,3
ChrII	9687541	9687797	1,2,3
ChrII	9690268	9691247	1,2,3
ChrII	9693196	9693555	1,2,3
ChrII	9697312	9697509	1,2,3
ChrII	9713268	9716302	1,2,3
ChrII	9717272	9725617	1,2,3
ChrII	9750458	9750727	1,2,3
ChrII	9751849	9752993	1,2,3
ChrII	9786369	9786990	1,2,3
ChrII	9813939	9814326	1,2,3
ChrII	9818875	9819680	1,2,3
ChrII	9834553	9834858	1,2,3
ChrII	9852546	9859212	1,2,3
ChrII	9860963	9862366	1,2,3
ChrII	9863177	9863836	1,2,3
ChrII	9879151	9879867	1,2,3
ChrII	9894231	9895330	1,2,3
ChrII	9897651	9902748	1,2,3
ChrII	9907242	9907489	1,2,3
ChrII	9910918	9911483	1,2,3
ChrII	9912634	9912903	1,2,3
ChrII	9929185	9929627	1,2,3
ChrII	9937672	9940908	1,2,3
ChrII	9942577	9942777	1,2,3
ChrII	9943765	9944862	1,2,3
ChrII	9946166	9948113	1,2,3
ChrII	9958137	9959330	1,2,3
ChrII	9983668	9984811	1,2,3
ChrII	9985861	9989753	1,2,3
ChrII	10013212	10014193	1,2,3
ChrII	10015090	10023328	1,2,3
ChrII	10024728	10026827	1,2,3
ChrII	10028402	10029565	1,2,3
ChrII	10031078	10033532	1,2,3
ChrII	10034925	10036834	1,2,3
ChrII	10039247	10041135	1,2,3
ChrII	10043557	10043852	1,2,3
ChrII	10087731	10087808	1,2,3
ChrII	10089532	10092235	1,2,3
ChrII	10106867	10109638	1,2,3
ChrII	10113886	10116339	1,2,3
ChrII	10117762	10121681	1,2,3
ChrII	10123526	10128459	1,2,3
ChrII	10129862	10130063	1,2,3
ChrII	10131849	10132213	1,2,3
ChrII	10144435	10145358	1,2,3
ChrII	10148243	10149191	1,2,3
ChrII	10150534	10152727	1,2,3
ChrII	10158245	10159092	1,2,3
ChrII	10165005	10166642	1,2,3
ChrII	10167634	10167831	1,2,3
ChrII	10168796	10172269	1,2,3
ChrII	10173264	10175276	1,2,3
ChrII	10176335	10176655	1,2,3
ChrII	10193866	10197297	1,2,3
ChrII	10202886	10203228	1,2,3
ChrII	10218116	10221012	1,2,3
ChrII	10222053	10224603	1,2,3
ChrII	10230517	10232057	1,2,3
ChrII	10233453	10236436	1,2,3
ChrII	10246004	10246571	1,2,3
ChrII	10249823	10250811	1,2,3
ChrII	10256682	10257483	1,2,3
ChrII	10259789	10260261	1,2,3
ChrII	10273730	10280451	1,2,3
ChrII	10281617	10283640	1,2,3
ChrII	10284915	10286433	1,2,3
ChrII	10290692	10298546	1,2,3
ChrII	10299553	10302099	1,2,3
ChrII	10307774	10308829	1,2,3
ChrII	10310439	10321369	1,2,3
ChrII	10322377	10322406	1,2,3
ChrII	10323709	10324730	1,2,3
ChrII	10326262	10329331	1,2,3
ChrII	10373978	10376410	1,2,3
ChrII	10377243	10380997	1,2,3
ChrII	10383298	10383519	1,2,3
ChrII	10384780	10387198	1,2,3
ChrII	10388880	10389292	1,2,3
ChrII	10391336	10395023	1,2,3
ChrII	10400184	10400806	1,2,3
ChrII	10403610	10404806	1,2,3
ChrII	10407052	10407429	1,2,3
ChrII	10409241	10416311	1,2,3
ChrII	10417392	10421876	1,2,3
ChrII	10435032	10438257	1,2,3
ChrII	10443445	10446183	1,2,3
ChrII	10449270	10450194	1,2,3
ChrII	10452907	10452957	1,2,3
ChrII	10454315	10457108	1,2,3
ChrII	10458091	10458816	1,2,3
ChrII	10461512	10463333	1,2,3
ChrII	10475042	10476711	1,2,3
ChrII	10478252	10480556	1,2,3
ChrII	10481582	10482513	1,2,3
ChrII	10483748	10483942	1,2,3
ChrII	10487326	10490372	1,2,3
ChrII	10495066	10497351	1,2,3
ChrII	10499668	10505232	1,2,3
ChrII	10506062	10513556	1,2,3
ChrII	10516646	10516670	1,2,3
ChrII	10517897	10518895	1,2,3
ChrII	10527367	10529093	1,2,3
ChrII	10538301	10538977	1,2,3
ChrII	10543403	10547389	1,2,3
ChrII	10554179	10554227	1,2,3
ChrII	10557246	10558615	1,2,3
ChrII	10560981	10564496	1,2,3
ChrII	10566696	10567618	1,2,3
ChrII	10574547	10576635	1,2,3
ChrII	10580254	10580665	1,2,3
ChrII	10597959	10599095	1,2,3
ChrII	10616452	10622784	1,2,3
ChrII	10624522	10624719	1,2,3
ChrII	10626712	10627125	1,2,3
ChrII	10628663	10631990	1,2,3
ChrII	10634440	10635313	1,2,3
ChrII	10640314	10642214	1,2,3
ChrII	10654275	10660870	1,2,3
ChrII	10665176	10669768	1,2,3
ChrII	10674980	10676617	1,2,3
ChrII	10680959	10683935	1,2,3
ChrII	10685830	10686033	1,2,3
ChrII	10687593	10687837	1,2,3
ChrII	10689037	10690439	1,2,3
ChrII	10693097	10693830	1,2,3
ChrII	10694756	10698083	1,2,3
ChrII	10699815	10700508	1,2,3
ChrII	10711859	10714568	1,2,3
ChrII	10715546	10716182	1,2,3
ChrII	10717638	10718098	1,2,3
ChrII	10719510	10719568	1,2,3
ChrII	10722711	10725931	1,2,3
ChrII	10727020	10728570	1,2,3
ChrII	10772862	10773108	1,2,3
ChrII	10775500	10776798	1,2,3
ChrII	10784927	10785804	1,2,3
ChrII	10789659	10790921	1,2,3
ChrII	10791793	10801476	1,2,3
ChrII	10802646	10808029	1,2,3
ChrII	10810938	10814619	1,2,3
ChrII	10819947	10821911	1,2,3
ChrII	10824814	10827004	1,2,3
ChrII	10828708	10831945	1,2,3
ChrII	10839706	10843458	1,2,3
ChrII	10847396	10852321	1,2,3
ChrII	10854810	10854939	1,2,3
ChrII	10862045	10867219	1,2,3
ChrII	10871157	10872032	1,2,3
ChrII	10874910	10875848	1,2,3
ChrII	10883303	10885221	1,2,3
ChrII	10894597	10894996	1,2,3
ChrII	10900305	10903885	1,2,3
ChrII	10910393	10911683	1,2,3
ChrII	10916522	10920792	1,2,3
ChrII	10925391	10925686	1,2,3
ChrII	10927790	10928064	1,2,3
ChrII	10929072	10929929	1,2,3
ChrII	10943231	10944530	1,2,3
ChrII	10956723	10957011	1,2,3
ChrII	10957840	10958944	1,2,3
ChrII	10961146	10962282	1,2,3
ChrII	10968259	10968702	1,2,3
ChrII	10969726	10969953	1,2,3
ChrII	10980131	10982818	1,2,3
ChrII	10986706	10988836	1,2,3
ChrII	10991525	10993028	1,2,3
ChrII	10997899	11004113	1,2,3
ChrII	11005135	11006294	1,2,3
ChrII	11009261	11013085	1,2,3
ChrII	11016459	11017243	1,2,3
ChrII	11018027	11018306	1,2,3
ChrII	11019125	11022019	1,2,3
ChrII	11023301	11035842	1,2,3
ChrII	11043993	11044055	1,2,3
ChrII	11056980	11059958	1,2,3
ChrII	11061349	11061604	1,2,3
ChrII	11071982	11074959	1,2,3
ChrII	11076097	11076657	1,2,3
ChrII	11077858	11088526	1,2,3
ChrII	11089466	11091829	1,2,3
ChrII	11094167	11096037	1,2,3
ChrII	11105798	11106466	1,2,3
ChrII	11108155	11111292	1,2,3
ChrII	11114746	11115144	1,2,3
ChrII	11116899	11118366	1,2,3
ChrII	11121955	11122757	1,2,3
ChrII	11123743	11125543	1,2,3
ChrII	11129174	11135001	1,2,3
ChrII	11137294	11137513	1,2,3
ChrII	11138346	11138759	1,2,3
ChrII	11141125	11144590	1,2,3
ChrII	11145508	11154012	1,2,3
ChrII	11158521	11159164	1,2,3
[truncated: 19,532 more rows]

## Sheet: H3K4me1
Chr	start	stop	replicate overlap
ChrI	230	738	1,2,3
ChrI	61329	62193	1,2,3
ChrI	122214	122381	1,2,3
ChrI	135218	135802	1,2,3
ChrI	166938	167202	1,2,3
ChrI	225545	226656	1,2,3
ChrI	228428	228758	1,2,3
ChrI	230136	230431	1,2,3
ChrI	342903	345105	1,2,3
ChrI	352649	353558	1,2,3
ChrI	354946	355898	1,2,3
ChrI	419134	419638	1,2,3
ChrI	423054	424666	1,2,3
ChrI	550933	551085	1,2,3
ChrI	674324	674421	1,2,3
ChrI	720670	721582	1,2,3
ChrI	722239	722407	1,2,3
ChrI	725750	727430	1,2,3
ChrI	1138932	1139120	1,2,3
ChrI	1572462	1572950	1,2,3
ChrI	1574188	1574420	1,2,3
ChrI	1792992	1793725	1,2,3
ChrI	1794386	1794524	1,2,3
ChrI	1870462	1870588	1,2,3
ChrI	2041936	2042121	1,2,3
ChrI	2105054	2105290	1,2,3
ChrI	2150281	2150733	1,2,3
ChrI	2162455	2163146	1,2,3
ChrI	2177335	2177544	1,2,3
ChrI	2179420	2179611	1,2,3
ChrI	2273403	2273621	1,2,3
ChrI	2288242	2288445	1,2,3
ChrI	2437505	2438036	1,2,3
ChrI	2528470	2528934	1,2,3
ChrI	2605068	2605190	1,2,3
ChrI	2612846	2613282	1,2,3
ChrI	2619698	2621644	1,2,3
ChrI	2629149	2629661	1,2,3
ChrI	2696007	2696789	1,2,3
ChrI	2698323	2699036	1,2,3
ChrI	2700783	2701418	1,2,3
ChrI	2702075	2703623	1,2,3
ChrI	2704671	2705500	1,2,3
ChrI	2915752	2915803	1,2,3
ChrI	2920438	2921007	1,2,3
ChrI	2943794	2944052	1,2,3
ChrI	2992290	2992507	1,2,3
ChrI	3157521	3158475	1,2,3
ChrI	3162363	3162942	1,2,3
ChrI	3534125	3535812	1,2,3
ChrI	3603100	3603308	1,2,3
ChrI	3622873	3623927	1,2,3
ChrI	3635171	3635693	1,2,3
ChrI	3928885	3929272	1,2,3
ChrI	3955564	3955784	1,2,3
ChrI	4180646	4180854	1,2,3
ChrI	4335570	4336277	1,2,3
ChrI	4351740	4351864	1,2,3
ChrI	4559955	4560599	1,2,3
ChrI	4629667	4630279	1,2,3
ChrI	4632775	4633175	1,2,3
ChrI	4667313	4668867	1,2,3
ChrI	4675088	4675581	1,2,3
ChrI	4918089	4918384	1,2,3
ChrI	4923974	4924374	1,2,3
ChrI	4925117	4926323	1,2,3
ChrI	4928816	4929576	1,2,3
ChrI	4930405	4930648	1,2,3
ChrI	4931327	4931509	1,2,3
ChrI	4961349	4962194	1,2,3
ChrI	4962938	4964297	1,2,3
ChrI	4965058	4965221	1,2,3
ChrI	5020202	5020407	1,2,3
ChrI	5021167	5021655	1,2,3
ChrI	5094247	5094931	1,2,3
ChrI	5134695	5135313	1,2,3
ChrI	5152640	5153176	1,2,3
ChrI	5478893	5479122	1,2,3
ChrI	5479938	5480997	1,2,3
ChrI	5536225	5536722	1,2,3
ChrI	5589410	5589854	1,2,3
ChrI	5744428	5745583	1,2,3
ChrI	5787020	5787860	1,2,3
ChrI	5963786	5965172	1,2,3
ChrI	6231775	6232433	1,2,3
ChrI	6233587	6234672	1,2,3
ChrI	6315185	6315469	1,2,3
ChrI	6324408	6324546	1,2,3
ChrI	6394312	6397507	1,2,3
ChrI	6398352	6400600	1,2,3
ChrI	6401426	6403039	1,2,3
ChrI	6404693	6405069	1,2,3
ChrI	6450288	6450466	1,2,3
ChrI	6652866	6653910	1,2,3
ChrI	6764937	6765142	1,2,3
ChrI	6767347	6767739	1,2,3
ChrI	6932513	6932699	1,2,3
ChrI	6988030	6988310	1,2,3
ChrI	7124065	7124242	1,2,3
ChrI	7125069	7125741	1,2,3
ChrI	7143329	7144764	1,2,3
ChrI	7163024	7163495	1,2,3
ChrI	7164347	7164577	1,2,3
ChrI	7253077	7253092	1,2,3
ChrI	7265791	7265956	1,2,3
ChrI	7288590	7290505	1,2,3
ChrI	7292707	7295730	1,2,3
ChrI	7409250	7409317	1,2,3
ChrI	7523556	7523812	1,2,3
ChrI	7525610	7526830	1,2,3
ChrI	7535810	7538546	1,2,3
ChrI	7539349	7544178	1,2,3
ChrI	7557066	7558068	1,2,3
ChrI	7559637	7559741	1,2,3
ChrI	7567822	7568163	1,2,3
ChrI	7575158	7576438	1,2,3
ChrI	7602806	7602982	1,2,3
ChrI	7819833	7820177	1,2,3
ChrI	7826577	7827182	1,2,3
ChrI	7854222	7854409	1,2,3
ChrI	8014665	8015324	1,2,3
ChrI	8016189	8016445	1,2,3
ChrI	8034086	8034149	1,2,3
ChrI	8076588	8077336	1,2,3
ChrI	8079633	8079972	1,2,3
ChrI	8086229	8087911	1,2,3
ChrI	8089847	8090157	1,2,3
ChrI	8093883	8095001	1,2,3
ChrI	8096615	8097235	1,2,3
ChrI	8125289	8125552	1,2,3
ChrI	8173895	8174011	1,2,3
ChrI	8187417	8187454	1,2,3
ChrI	8197573	8198363	1,2,3
ChrI	8226343	8227068	1,2,3
ChrI	8275557	8277232	1,2,3
ChrI	8277891	8279011	1,2,3
ChrI	8313747	8316110	1,2,3
ChrI	8814236	8814403	1,2,3
ChrI	8868520	8868914	1,2,3
ChrI	8872888	8872906	1,2,3
ChrI	8877748	8878350	1,2,3
ChrI	8891695	8893074	1,2,3
ChrI	8901014	8901232	1,2,3
ChrI	9105681	9105925	1,2,3
ChrI	9121735	9122035	1,2,3
ChrI	9123941	9124884	1,2,3
ChrI	9126108	9126719	1,2,3
ChrI	9135965	9136257	1,2,3
ChrI	9141325	9141801	1,2,3
ChrI	9143031	9143526	1,2,3
ChrI	9180094	9180263	1,2,3
ChrI	9199879	9200703	1,2,3
ChrI	9273323	9273571	1,2,3
ChrI	9307787	9307870	1,2,3
ChrI	9434076	9434701	1,2,3
ChrI	9445361	9446478	1,2,3
ChrI	9447478	9447835	1,2,3
ChrI	9487591	9489777	1,2,3
ChrI	9493519	9493849	1,2,3
ChrI	9516753	9517178	1,2,3
ChrI	9519262	9520297	1,2,3
ChrI	9560766	9561425	1,2,3
ChrI	9566213	9566976	1,2,3
ChrI	9622865	9622970	1,2,3
ChrI	9679690	9679732	1,2,3
ChrI	9694415	9696233	1,2,3
ChrI	9731277	9732270	1,2,3
ChrI	9733554	9733643	1,2,3
ChrI	9736282	9740172	1,2,3
ChrI	9741184	9742299	1,2,3
ChrI	9743040	9744108	1,2,3
ChrI	9755886	9757437	1,2,3
ChrI	9759407	9760126	1,2,3
ChrI	9760836	9761249	1,2,3
ChrI	9786220	9786686	1,2,3
ChrI	9794307	9794517	1,2,3
ChrI	9808739	9809995	1,2,3
ChrI	9814548	9814955	1,2,3
ChrI	9818252	9818805	1,2,3
ChrI	9820288	9824614	1,2,3
ChrI	9834485	9835685	1,2,3
ChrI	9853738	9854569	1,2,3
ChrI	9882322	9882781	1,2,3
ChrI	9883732	9884662	1,2,3
ChrI	9888341	9888569	1,2,3
ChrI	9892957	9893107	1,2,3
ChrI	9988902	9989401	1,2,3
ChrI	9991035	9991268	1,2,3
ChrI	10002337	10002517	1,2,3
ChrI	10008850	10011690	1,2,3
ChrI	10014953	10015594	1,2,3
ChrI	10030981	10032070	1,2,3
ChrI	10032963	10033536	1,2,3
ChrI	10043450	10044030	1,2,3
ChrI	10048331	10049358	1,2,3
ChrI	10050172	10050975	1,2,3
ChrI	10052777	10053808	1,2,3
ChrI	10063822	10064031	1,2,3
ChrI	10078118	10079601	1,2,3
ChrI	10156554	10159461	1,2,3
ChrI	10163017	10163817	1,2,3
ChrI	10172213	10173708	1,2,3
ChrI	10174732	10174942	1,2,3
ChrI	10183936	10184127	1,2,3
ChrI	10193497	10193977	1,2,3
ChrI	10230676	10232241	1,2,3
ChrI	10368232	10368764	1,2,3
ChrI	10370291	10370507	1,2,3
ChrI	10373921	10374126	1,2,3
ChrI	10403487	10404001	1,2,3
ChrI	10405575	10407241	1,2,3
ChrI	10441963	10442187	1,2,3
ChrI	10444964	10446040	1,2,3
ChrI	10449562	10450428	1,2,3
ChrI	10458814	10459040	1,2,3
ChrI	10460140	10460634	1,2,3
ChrI	10465324	10465499	1,2,3
ChrI	10466672	10467835	1,2,3
ChrI	10469909	10470100	1,2,3
ChrI	10472035	10472638	1,2,3
ChrI	10473990	10474391	1,2,3
ChrI	10497918	10500192	1,2,3
ChrI	10502269	10502992	1,2,3
ChrI	10515297	10515508	1,2,3
ChrI	10521122	10521735	1,2,3
ChrI	10569433	10569647	1,2,3
ChrI	10575298	10577851	1,2,3
ChrI	10579848	10580187	1,2,3
ChrI	10582648	10583433	1,2,3
ChrI	10614957	10615406	1,2,3
ChrI	10616365	10616710	1,2,3
ChrI	10650441	10651904	1,2,3
ChrI	10656696	10658279	1,2,3
ChrI	10662597	10664446	1,2,3
ChrI	10672863	10673231	1,2,3
ChrI	10688511	10688834	1,2,3
ChrI	10705674	10706456	1,2,3
ChrI	10708375	10709181	1,2,3
ChrI	10712906	10713405	1,2,3
ChrI	10715516	10715783	1,2,3
ChrI	10749394	10749596	1,2,3
ChrI	10768253	10768328	1,2,3
ChrI	10772221	10772421	1,2,3
ChrI	10775240	10775412	1,2,3
ChrI	10790815	10792272	1,2,3
ChrI	10793943	10794342	1,2,3
ChrI	10803882	10804103	1,2,3
ChrI	10863250	10864547	1,2,3
ChrI	10871311	10871333	1,2,3
ChrI	10893238	10893304	1,2,3
ChrI	10894453	10895040	1,2,3
ChrI	10959028	10959722	1,2,3
ChrI	10963827	10964040	1,2,3
ChrI	10974725	10975673	1,2,3
ChrI	10996411	10997919	1,2,3
ChrI	11001996	11003614	1,2,3
ChrI	11018960	11019315	1,2,3
ChrI	11021573	11021754	1,2,3
ChrI	11035866	11035997	1,2,3
ChrI	11041632	11042847	1,2,3
ChrI	11044593	11045103	1,2,3
ChrI	11048218	11048540	1,2,3
ChrI	11049995	11050558	1,2,3
ChrI	11063934	11064691	1,2,3
ChrI	11072468	11073514	1,2,3
ChrI	11078701	11079110	1,2,3
ChrI	11080572	11080749	1,2,3
ChrI	11084602	11085296	1,2,3
ChrI	11086544	11087862	1,2,3
ChrI	11088683	11089612	1,2,3
ChrI	11103720	11104300	1,2,3
ChrI	11108464	11109754	1,2,3
ChrI	11112399	11114052	1,2,3
ChrI	11114774	11117029	1,2,3
ChrI	11121727	11122027	1,2,3
ChrI	11126582	11127059	1,2,3
ChrI	11129496	11130057	1,2,3
ChrI	11133130	11133147	1,2,3
ChrI	11134688	11134871	1,2,3
ChrI	11162596	11163213	1,2,3
ChrI	11166973	11167216	1,2,3
ChrI	11203657	11204073	1,2,3
ChrI	11205430	11205837	1,2,3
ChrI	11248740	11249180	1,2,3
ChrI	11273745	11274528	1,2,3
ChrI	11288219	11288449	1,2,3
ChrI	11289482	11289944	1,2,3
ChrI	11297890	11298075	1,2,3
ChrI	11302618	11303262	1,2,3
ChrI	11305930	11306848	1,2,3
ChrI	11308022	11308659	1,2,3
ChrI	11309960	11310150	1,2,3
ChrI	11310847	11313852	1,2,3
ChrI	11315234	11317079	1,2,3
ChrI	11332029	11332680	1,2,3
ChrI	11334266	11334841	1,2,3
ChrI	11337108	11337605	1,2,3
ChrI	11338719	11339644	1,2,3
ChrI	11341130	11342297	1,2,3
ChrI	11346315	11347429	1,2,3
ChrI	11359956	11360146	1,2,3
ChrI	11371195	11371412	1,2,3
ChrI	11372210	11372674	1,2,3
ChrI	11391718	11392742	1,2,3
ChrI	11393523	11394140	1,2,3
ChrI	11395326	11396075	1,2,3
ChrI	11410578	11411591	1,2,3
ChrI	11420809	11421261	1,2,3
ChrI	11422483	11422665	1,2,3
ChrI	11428746	11430305	1,2,3
ChrI	11444835	11445281	1,2,3
ChrI	11446487	11446860	1,2,3
ChrI	11447873	11448189	1,2,3
ChrI	11451229	11451763	1,2,3
ChrI	11454397	11455225	1,2,3
ChrI	11474877	11475567	1,2,3
ChrI	11496984	11497237	1,2,3
ChrI	11516602	11517127	1,2,3
ChrI	11558991	11559523	1,2,3
ChrI	11565464	11565709	1,2,3
ChrI	11580680	11580971	1,2,3
ChrI	11582193	11582803	1,2,3
ChrI	11586371	11587445	1,2,3
ChrI	11604296	11604588	1,2,3
ChrI	11627869	11628341	1,2,3
ChrI	11696469	11698897	1,2,3
ChrI	11727949	11728660	1,2,3
ChrI	11730428	11730606	1,2,3
ChrI	11769796	11775493	1,2,3
ChrI	11818582	11820806	1,2,3
ChrI	11821737	11822755	1,2,3
ChrI	11824037	11824212	1,2,3
ChrI	11922698	11922989	1,2,3
ChrI	11939971	11940508	1,2,3
ChrI	11941852	11942141	1,2,3
ChrI	11982242	11987699	1,2,3
ChrI	11988876	11990465	1,2,3
ChrI	11992363	11994223	1,2,3
ChrI	11994987	11998766	1,2,3
ChrI	11999486	12000158	1,2,3
ChrI	12000890	12001645	1,2,3
ChrI	12006652	12007324	1,2,3
ChrI	12036012	12036814	1,2,3
ChrI	12051678	12051993	1,2,3
ChrI	12069308	12069734	1,2,3
ChrI	12095961	12096199	1,2,3
ChrI	12098180	12098436	1,2,3
ChrI	12127731	12128143	1,2,3
ChrI	12141637	12142110	1,2,3
ChrI	12162638	12166472	1,2,3
ChrI	12170567	12171114	1,2,3
ChrI	12174847	12174857	1,2,3
ChrI	12175665	12176805	1,2,3
ChrI	12177469	12177713	1,2,3
ChrI	12181999	12184096	1,2,3
ChrI	12185434	12185630	1,2,3
ChrI	12186372	12187573	1,2,3
ChrI	12188230	12189582	1,2,3
ChrI	12199136	12199857	1,2,3
ChrI	12200540	12201632	1,2,3
ChrI	12203008	12205750	1,2,3
ChrI	12206730	12207613	1,2,3
ChrI	12212030	12212379	1,2,3
ChrI	12213088	12214788	1,2,3
ChrI	12236728	12236907	1,2,3
ChrI	12238719	12238926	1,2,3
ChrI	12267059	12267063	1,2,3
ChrI	12283397	12284538	1,2,3
ChrI	12285812	12286001	1,2,3
ChrI	12289389	12290304	1,2,3
ChrI	12290999	12292061	1,2,3
ChrI	12297808	12298065	1,2,3
ChrI	12309231	12309474	1,2,3
ChrI	12347981	12348757	1,2,3
ChrI	12415161	12417451	1,2,3
ChrI	12420411	12421012	1,2,3
ChrI	12421838	12424157	1,2,3
ChrI	12424972	12426619	1,2,3
ChrI	12428375	12428689	1,2,3
ChrI	12429554	12429935	1,2,3
ChrI	12436753	12436919	1,2,3
ChrI	12478479	12478817	1,2,3
ChrI	12479595	12479836	1,2,3
ChrI	12485064	12485141	1,2,3
ChrI	12501215	12501604	1,2,3
ChrI	12554463	12554750	1,2,3
ChrI	12555452	12556982	1,2,3
ChrI	12559862	12560574	1,2,3
ChrI	12561644	12562677	1,2,3
ChrI	12565329	12565616	1,2,3
ChrI	12577817	12578106	1,2,3
ChrI	12598606	12599886	1,2,3
ChrI	12605682	12609329	1,2,3
ChrI	12613231	12615020	1,2,3
ChrI	12615873	12617473	1,2,3
ChrI	12618156	12618652	1,2,3
ChrI	12619420	12619860	1,2,3
ChrI	12623285	12623569	1,2,3
ChrI	12627246	12627788	1,2,3
ChrI	12649418	12649820	1,2,3
ChrI	12654261	12654837	1,2,3
ChrI	12656034	12657696	1,2,3
ChrI	12658947	12659805	1,2,3
ChrI	12663952	12664421	1,2,3
ChrI	12665348	12666203	1,2,3
ChrI	12667707	12667920	1,2,3
ChrI	12671419	12671882	1,2,3
ChrI	12690473	12690751	1,2,3
ChrI	12691924	12692225	1,2,3
ChrI	12693303	12693503	1,2,3
ChrI	12704493	12705015	1,2,3
ChrI	12707589	12709022	1,2,3
ChrI	12753209	12753672	1,2,3
ChrI	12754809	12755814	1,2,3
ChrI	12757584	12757833	1,2,3
ChrI	12766500	12767341	1,2,3
ChrI	12769578	12770895	1,2,3
ChrI	12789538	12790050	1,2,3
ChrI	12795963	12796169	1,2,3
ChrI	12806177	12806362	1,2,3
ChrI	12808399	12809178	1,2,3
ChrI	12816037	12816778	1,2,3
ChrI	12847005	12848144	1,2,3
ChrI	12860612	12861227	1,2,3
ChrI	12862518	12863456	1,2,3
ChrI	12864814	12865387	1,2,3
ChrI	12874883	12875263	1,2,3
ChrI	12876089	12876954	1,2,3
ChrI	12930798	12931355	1,2,3
ChrI	12942326	12943061	1,2,3
ChrI	12961966	12962221	1,2,3
ChrI	12997982	12998557	1,2,3
ChrI	12999214	12999621	1,2,3
ChrI	13001033	13003910	1,2,3
ChrI	13006190	13007211	1,2,3
ChrI	13012524	13013488	1,2,3
ChrI	13014781	13014892	1,2,3
ChrI	13016240	13017670	1,2,3
ChrI	13018673	13018761	1,2,3
ChrI	13052676	13052917	1,2,3
ChrI	13077051	13077320	1,2,3
ChrI	13078225	13078808	1,2,3
ChrI	13083239	13083642	1,2,3
ChrI	13088473	13088761	1,2,3
ChrI	13089582	13091799	1,2,3
ChrI	13095930	13098285	1,2,3
ChrI	13100601	13102144	1,2,3
ChrI	13116252	13116449	1,2,3
ChrI	13118470	13118958	1,2,3
ChrI	13152418	13153083	1,2,3
ChrI	13155275	13155774	1,2,3
ChrI	13157692	13158083	1,2,3
ChrI	13166530	13166759	1,2,3
ChrI	13186582	13186852	1,2,3
ChrI	13188567	13189678	1,2,3
ChrI	13193263	13193460	1,2,3
ChrI	13236830	13237892	1,2,3
ChrI	13255944	13256161	1,2,3
ChrI	13281449	13282227	1,2,3
ChrI	13283266	13283738	1,2,3
ChrI	13285081	13285134	1,2,3
ChrI	13291649	13292480	1,2,3
ChrI	13297840	13298125	1,2,3
ChrI	13311697	13312399	1,2,3
ChrI	13316669	13318847	1,2,3
ChrI	13319540	13320422	1,2,3
ChrI	13334965	13337861	1,2,3
ChrI	13356466	13356687	1,2,3
ChrI	13361519	13362108	1,2,3
ChrI	13365083	13365470	1,2,3
ChrI	13371255	13375885	1,2,3
ChrI	13377049	13377809	1,2,3
ChrI	13384499	13385347	1,2,3
ChrI	13386090	13386607	1,2,3
ChrI	13410862	13411090	1,2,3
ChrI	13418234	13419005	1,2,3
ChrI	13423708	13424909	1,2,3
ChrI	13425655	13425931	1,2,3
ChrI	13435354	13436854	1,2,3
ChrI	13438027	13438700	1,2,3
ChrI	13460432	13460917	1,2,3
ChrI	13501821	13502882	1,2,3
ChrI	13517587	13517727	1,2,3
ChrI	13518732	13519660	1,2,3
ChrI	13593918	13598777	1,2,3
ChrI	13619983	13620195	1,2,3
ChrI	13708682	13710809	1,2,3
ChrI	13837676	13838290	1,2,3
ChrI	13843968	13844200	1,2,3
ChrI	13844907	13846152	1,2,3
ChrI	13982974	13983042	1,2,3
ChrI	14011873	14013006	1,2,3
ChrI	14049215	14049714	1,2,3
ChrI	14056708	14057356	1,2,3
ChrI	14129319	14129615	1,2,3
ChrI	14293275	14293653	1,2,3
ChrI	14370229	14371105	1,2,3
ChrI	14375510	14375893	1,2,3
ChrI	14417921	14418097	1,2,3
ChrI	14422838	14423380	1,2,3
ChrI	14426706	14427066	1,2,3
ChrI	14446277	14446486	1,2,3
ChrI	14527866	14528072	1,2,3
ChrI	14529353	14530031	1,2,3
ChrI	14539095	14540219	1,2,3
ChrI	14605192	14605629	1,2,3
ChrI	14607562	14608023	1,2,3
ChrI	14608875	14608959	1,2,3
ChrI	14672093	14672854	1,2,3
ChrI	14730804	14731708	1,2,3
ChrI	14758744	14758756	1,2,3
ChrI	14778995	14779070	1,2,3
ChrI	14895687	14895908	1,2,3
ChrI	14906703	14906898	1,2,3
ChrI	14907600	14907660	1,2,3
ChrI	14930479	14930622	1,2,3
ChrI	14931319	14931748	1,2,3
ChrI	14932763	14933082	1,2,3
ChrI	14944664	14945299	1,2,3
ChrI	15046723	15047763	1,2,3
ChrI	15051241	15051461	1,2,3
ChrI	15093309	15093533	1,2,3
ChrI	15094320	15094814	1,2,3
ChrI	15125878	15125959	1,2,3
ChrI	15126767	15127010	1,2,3
ChrI	15128846	15129989	1,2,3
ChrI	15140407	15140904	1,2,3
ChrI	15141982	15142596	1,2,3
ChrI	15218539	15218684	1,2,3
ChrI	15351615	15352079	1,2,3
ChrI	15365608	15367154	1,2,3
ChrI	15368963	15369511	1,2,3
ChrI	15371386	15371895	1,2,3
ChrI	15682459	15682545	1,2,3
ChrI	15684383	15686030	1,2,3
ChrI	15687311	15688499	1,2,3
ChrI	15691647	15691875	1,2,3
ChrI	15696448	15697477	1,2,3
ChrI	16304759	16306180	1,2,3
ChrI	16307667	16307863	1,2,3
ChrI	16309904	16310513	1,2,3
ChrI	16311399	16311685	1,2,3
ChrI	16313272	16314259	1,2,3
ChrI	16324735	16325174	1,2,3
ChrI	16416557	16416652	1,2,3
ChrI	16417980	16418645	1,2,3
ChrI	16423161	16423335	1,2,3
ChrI	16436152	16436807	1,2,3
ChrI	16439089	16441440	1,2,3
ChrI	16442395	16442605	1,2,3
ChrI	16736778	16737053	1,2,3
ChrI	16821582	16822286	1,2,3
ChrI	16825210	16825424	1,2,3
ChrI	16826460	16827894	1,2,3
ChrI	16829478	16830005	1,2,3
ChrI	16833921	16835817	1,2,3
ChrI	16836570	16837001	1,2,3
ChrI	16838958	16841161	1,2,3
ChrI	16848615	16848962	1,2,3
ChrI	16872101	16872562	1,2,3
ChrI	16874555	16874777	1,2,3
ChrI	16903165	16903370	1,2,3
ChrI	16921299	16922068	1,2,3
ChrI	16929431	16929815	1,2,3
ChrI	16930611	16930927	1,2,3
ChrI	16932484	16933391	1,2,3
ChrI	17004483	17004569	1,2,3
ChrI	17167290	17169537	1,2,3
ChrI	17208388	17208468	1,2,3
ChrI	17435313	17435371	1,2,3
ChrI	17548845	17549423	1,2,3
ChrI	17550960	17551258	1,2,3
ChrI	17566498	17566720	1,2,3
ChrI	17572747	17573439	1,2,3
ChrI	17583128	17583426	1,2,3
ChrI	17586714	17587324	1,2,3
ChrI	17588791	17588961	1,2,3
ChrI	17636960	17637297	1,2,3
ChrI	17642774	17643048	1,2,3
ChrI	17645089	17646296	1,2,3
ChrI	17815127	17815425	1,2,3
ChrI	17827987	17828543	1,2,3
ChrI	17829681	17830495	1,2,3
ChrI	17889213	17889467	1,2,3
ChrI	18092902	18093597	1,2,3
ChrI	18238217	18238461	1,2,3
ChrI	18386698	18386838	1,2,3
ChrI	18440724	18441344	1,2,3
ChrI	18461750	18461809	1,2,3
ChrI	18491617	18492317	1,2,3
ChrI	18493801	18493938	1,2,3
ChrI	18495002	18495430	1,2,3
ChrI	18506478	18507212	1,2,3
ChrI	18640369	18640903	1,2,3
ChrI	18642513	18643449	1,2,3
ChrI	18675094	18675345	1,2,3
ChrI	18871561	18872920	1,2,3
ChrI	19585291	19585416	1,2,3
ChrI	19588084	19588772	1,2,3
ChrI	19589642	19590512	1,2,3
ChrI	19779899	19779906	1,2,3
ChrI	19834959	19835613	1,2,3
ChrI	19837207	19838084	1,2,3
ChrI	19872381	19873658	1,2,3
ChrI	19875073	19875255	1,2,3
ChrI	19913359	19914032	1,2,3
ChrI	20387438	20387554	1,2,3
ChrI	20406817	20407142	1,2,3
ChrI	20429189	20429370	1,2,3
ChrI	20765031	20765117	1,2,3
ChrI	20822772	20823248	1,2,3
ChrI	20825021	20826186	1,2,3
ChrI	20865100	20865875	1,2,3
ChrI	20867332	20867713	1,2,3
ChrI	20884759	20885029	1,2,3
ChrI	20900872	20901457	1,2,3
ChrI	20918987	20919676	1,2,3
ChrI	21152933	21153008	1,2,3
ChrI	21153714	21154507	1,2,3
ChrI	21168213	21168893	1,2,3
ChrI	21169902	21170418	1,2,3
ChrI	21208963	21209141	1,2,3
ChrI	21238411	21241604	1,2,3
ChrI	21242391	21242679	1,2,3
ChrI	21243386	21244623	1,2,3
ChrI	21248209	21248672	1,2,3
ChrI	21259350	21259644	1,2,3
ChrI	21267568	21268162	1,2,3
ChrI	21286370	21286620	1,2,3
ChrI	21303022	21303286	1,2,3
ChrI	21311350	21311434	1,2,3
ChrI	21415085	21415164	1,2,3
ChrI	21450800	21452351	1,2,3
ChrI	21468012	21468624	1,2,3
ChrI	21606249	21607022	1,2,3
ChrI	21614227	21614911	1,2,3
ChrI	21865449	21865895	1,2,3
ChrI	21933366	21934847	1,2,3
ChrI	21943099	21945429	1,2,3
ChrI	21954745	21955163	1,2,3
ChrI	21972688	21973285	1,2,3
ChrI	22052756	22054118	1,2,3
ChrI	22147035	22148047	1,2,3
ChrI	22180895	22181074	1,2,3
ChrI	22351131	22351921	1,2,3
ChrI	22619160	22619462	1,2,3
ChrI	22621609	22622523	1,2,3
ChrI	22626327	22626956	1,2,3
ChrI	22822789	22822996	1,2,3
ChrI	22826206	22826686	1,2,3
ChrI	23032160	23032269	1,2,3
ChrI	23033267	23034618	1,2,3
ChrI	23057381	23058903	1,2,3
ChrI	23059771	23060656	1,2,3
ChrI	23313564	23313905	1,2,3
ChrI	23325207	23326156	1,2,3
ChrI	23336041	23336203	1,2,3
ChrI	23337580	23338495	1,2,3
ChrI	23396822	23397053	1,2,3
ChrI	23404014	23404623	1,2,3
ChrI	23405315	23407099	1,2,3
ChrI	23410550	23410871	1,2,3
ChrI	23418222	23418538	1,2,3
ChrI	23532264	23532462	1,2,3
ChrI	23533818	23534081	1,2,3
ChrI	23718312	23718679	1,2,3
ChrI	23751378	23752420	1,2,3
ChrI	23753255	23753522	1,2,3
ChrI	23773714	23773953	1,2,3
ChrI	24143496	24143639	1,2,3
ChrI	24230110	24230666	1,2,3
ChrI	24298721	24298853	1,2,3
ChrI	24354865	24355155	1,2,3
ChrI	24357185	24357511	1,2,3
ChrI	24360310	24360467	1,2,3
ChrI	24362217	24362796	1,2,3
ChrI	24369244	24369555	1,2,3
ChrI	24370869	24371918	1,2,3
ChrI	24374094	24375290	1,2,3
ChrI	24383608	24383836	1,2,3
ChrI	24636877	24637417	1,2,3
ChrI	24721395	24722017	1,2,3
ChrI	24725569	24725838	1,2,3
ChrI	24764475	24764678	1,2,3
ChrI	24801814	24802023	1,2,3
ChrI	24807860	24808119	1,2,3
ChrI	24809772	24810421	1,2,3
ChrI	24811230	24812575	1,2,3
ChrI	24814434	24814533	1,2,3
ChrI	24821498	24821738	1,2,3
ChrI	24922942	24924007	1,2,3
ChrI	24954400	24955569	1,2,3
ChrI	24964053	24967797	1,2,3
ChrI	24968484	24969023	1,2,3
ChrI	24983997	24984222	1,2,3
ChrI	25032662	25032818	1,2,3
ChrI	25123007	25123206	1,2,3
ChrI	25160990	25161214	1,2,3
ChrI	25245228	25245654	1,2,3
ChrI	25379104	25381059	1,2,3
ChrI	25488640	25490120	1,2,3
ChrI	25639131	25639671	1,2,3
ChrI	25713787	25714277	1,2,3
ChrI	25729939	25730106	1,2,3
ChrI	25742779	25742989	1,2,3
ChrI	25964081	25964423	1,2,3
ChrI	25965874	25965886	1,2,3
ChrI	26110145	26110334	1,2,3
ChrI	26111215	26112773	1,2,3
ChrI	26114097	26115242	1,2,3
ChrI	26188145	26188310	1,2,3
ChrI	26191506	26191736	1,2,3
ChrI	26192499	26194743	1,2,3
ChrI	26252854	26252948	1,2,3
ChrI	26357130	26357775	1,2,3
ChrI	26441702	26442051	1,2,3
ChrI	26449313	26449440	1,2,3
ChrI	26483667	26483945	1,2,3
ChrI	26506944	26508294	1,2,3
ChrI	26509085	26509670	1,2,3
ChrI	26511363	26512193	1,2,3
ChrI	26553925	26554307	1,2,3
ChrI	26651855	26652024	1,2,3
ChrI	26686864	26687437	1,2,3
ChrI	26705404	26705580	1,2,3
ChrI	26734428	26735054	1,2,3
ChrI	26739627	26740032	1,2,3
ChrI	26840552	26841357	1,2,3
ChrI	26842022	26842706	1,2,3
ChrI	26843823	26844547	1,2,3
ChrI	26854291	26855437	1,2,3
ChrI	26856572	26858154	1,2,3
ChrI	26888342	26888965	1,2,3
ChrI	26889784	26890172	1,2,3
ChrI	26909746	26910565	1,2,3
ChrI	26946662	26947386	1,2,3
ChrI	26957540	26957578	1,2,3
ChrI	26960591	26961051	1,2,3
ChrI	26991580	26991839	1,2,3
ChrI	27030849	27031068	1,2,3
ChrI	27064824	27065355	1,2,3
ChrI	27097618	27098054	1,2,3
ChrI	27111835	27111992	1,2,3
ChrI	27115103	27115392	1,2,3
ChrI	27118237	27118462	1,2,3
ChrI	27119152	27119465	1,2,3
ChrI	27124320	27125005	1,2,3
ChrI	27181007	27181546	1,2,3
ChrI	27184021	27184728	1,2,3
ChrI	27198137	27198524	1,2,3
ChrI	27204483	27205014	1,2,3
ChrI	27229627	27230631	1,2,3
ChrI	27237230	27237774	1,2,3
ChrI	27269174	27269786	1,2,3
ChrI	27271368	27271657	1,2,3
ChrI	27299158	27299625	1,2,3
ChrI	27419606	27421812	1,2,3
ChrI	27435954	27436592	1,2,3
ChrI	27437423	27437606	1,2,3
ChrI	27528818	27529237	1,2,3
ChrI	27558010	27558342	1,2,3
ChrI	27676007	27676598	1,2,3
ChrI	27677344	27677760	1,2,3
ChrI	27753372	27753395	1,2,3
ChrI	27792538	27792818	1,2,3
ChrI	27794248	27796770	1,2,3
ChrI	27855901	27856102	1,2,3
ChrI	27862459	27864460	1,2,3
ChrI	27886871	27887162	1,2,3
ChrI	28048696	28048863	1,2,3
ChrI	28051336	28051734	1,2,3
ChrI	28088948	28089628	1,2,3
ChrI	28092995	28093120	1,2,3
ChrI	28094293	28094459	1,2,3
ChrI	28124973	28125192	1,2,3
ChrI	28167218	28167462	1,2,3
ChrI	28168121	28168596	1,2,3
ChrI	28170698	28171775	1,2,3
ChrI	28198601	28198998	1,2,3
ChrI	28312469	28312918	1,2,3
ChrI	28314189	28314805	1,2,3
ChrI	28315748	28316846	1,2,3
ChrI	28482711	28482928	1,2,3
ChrI	28535556	28536182	1,2,3
ChrI	28548262	28548341	1,2,3
ChrI	28553157	28553950	1,2,3
ChrI	28555733	28555905	1,2,3
ChrI	28556781	28557219	1,2,3
ChrI	28653331	28654050	1,2,3
ChrI	28654834	28655485	1,2,3
ChrI	28693375	28693657	1,2,3
ChrI	28707924	28708542	1,2,3
ChrI	28724374	28725006	1,2,3
ChrI	28757277	28757667	1,2,3
ChrI	28799148	28799348	1,2,3
ChrI	28803992	28804787	1,2,3
ChrI	28885632	28885987	1,2,3
ChrI	28886735	28887062	1,2,3
ChrI	28888612	28889010	1,2,3
ChrI	28890712	28891068	1,2,3
ChrI	28894245	28894731	1,2,3
ChrI	28895446	28895724	1,2,3
ChrI	29039054	29041995	1,2,3
ChrI	29048290	29048775	1,2,3
ChrI	29159235	29159469	1,2,3
ChrI	29160339	29161345	1,2,3
ChrI	29233634	29234233	1,2,3
ChrI	29238318	29239581	1,2,3
ChrI	29286243	29286841	1,2,3
ChrI	29371930	29371950	1,2,3
ChrI	29409182	29411372	1,2,3
ChrI	29412709	29414163	1,2,3
ChrI	29417255	29417443	1,2,3
ChrI	29420188	29420692	1,2,3
ChrI	29425846	29426081	1,2,3
ChrI	29426835	29427008	1,2,3
ChrI	29429710	29433659	1,2,3
ChrI	29437258	29440869	1,2,3
ChrI	29442071	29442694	1,2,3
ChrI	29459936	29460127	1,2,3
ChrI	29463102	29463531	1,2,3
ChrI	29467160	29467933	1,2,3
ChrI	29468948	29470160	1,2,3
ChrI	29470843	29471591	1,2,3
ChrI	29473904	29474169	1,2,3
ChrI	29481248	29481430	1,2,3
ChrI	29483438	29483602	1,2,3
ChrI	29494198	29494398	1,2,3
ChrI	29528550	29529145	1,2,3
ChrI	29534858	29534871	1,2,3
ChrI	29574741	29574914	1,2,3
ChrI	29576733	29576860	1,2,3
ChrI	29591730	29591879	1,2,3
ChrI	29660537	29661045	1,2,3
ChrI	29668346	29668606	1,2,3
ChrI	29671938	29672246	1,2,3
ChrI	29674847	29676241	1,2,3
ChrI	29679506	29680317	1,2,3
ChrI	29685850	29686286	1,2,3
ChrI	29690925	29694503	1,2,3
ChrI	29719380	29719476	1,2,3
ChrI	29720471	29720830	1,2,3
ChrI	29742816	29743113	1,2,3
ChrI	29755938	29756328	1,2,3
ChrI	29761699	29762026	1,2,3
ChrI	29764052	29764279	1,2,3
ChrI	29766976	29767205	1,2,3
ChrI	29768515	29769182	1,2,3
ChrI	29796952	29797185	1,2,3
ChrI	29846113	29846490	1,2,3
ChrI	29869565	29870771	1,2,3
ChrI	29871716	29872851	1,2,3
ChrI	29873906	29875547	1,2,3
ChrI	29880830	29881286	1,2,3
ChrI	29882753	29883129	1,2,3
ChrI	29940024	29940997	1,2,3
ChrI	29948245	29948251	1,2,3
ChrI	29948950	29949145	1,2,3
ChrI	29981760	29983352	1,2,3
ChrI	30002736	30002819	1,2,3
ChrI	30006731	30008568	1,2,3
ChrI	30022458	30025398	1,2,3
ChrI	30031131	30031600	1,2,3
ChrI	30063810	30064164	1,2,3
ChrI	30070788	30071798	1,2,3
ChrI	30078121	30080197	1,2,3
ChrI	30081881	30082269	1,2,3
ChrI	30090949	30091650	1,2,3
ChrI	30094397	30095205	1,2,3
ChrI	30137166	30137957	1,2,3
ChrI	30159961	30160569	1,2,3
ChrI	30174812	30175132	1,2,3
ChrI	30200314	30202462	1,2,3
ChrI	30205659	30207271	1,2,3
ChrI	30233968	30234121	1,2,3
ChrI	30235177	30235365	1,2,3
ChrI	30240452	30241091	1,2,3
ChrI	30266494	30267527	1,2,3
ChrI	30268201	30269265	1,2,3
ChrI	30282855	30283147	1,2,3
ChrI	30287303	30287358	1,2,3
ChrI	30297349	30297547	1,2,3
ChrI	30303004	30303795	1,2,3
ChrI	30304672	30306983	1,2,3
ChrI	30332567	30332796	1,2,3
ChrI	30342890	30343887	1,2,3
ChrI	30378476	30379146	1,2,3
ChrI	30460177	30460512	1,2,3
ChrI	30461837	30466409	1,2,3
ChrI	30467130	30467873	1,2,3
ChrI	30481630	30481984	1,2,3
ChrI	30501046	30501067	1,2,3
ChrI	30507683	30508410	1,2,3
ChrI	30524129	30524242	1,2,3
ChrI	30569141	30569817	1,2,3
ChrI	30591219	30591250	1,2,3
ChrI	30594030	30594365	1,2,3
ChrI	30608414	30609968	1,2,3
ChrI	30613479	30614075	1,2,3
ChrI	30620054	30620682	1,2,3
ChrI	30622036	30623930	1,2,3
ChrI	30645744	30645804	1,2,3
ChrI	30673110	30673666	1,2,3
ChrI	30675031	30675891	1,2,3
ChrI	30698576	30699628	1,2,3
ChrI	30702881	30703093	1,2,3
ChrI	30714875	30715368	1,2,3
ChrI	30716794	30717044	1,2,3
ChrI	30737449	30737944	1,2,3
ChrI	30742604	30742847	1,2,3
ChrI	30764139	30766061	1,2,3
ChrI	30772974	30774437	1,2,3
ChrI	30775716	30776516	1,2,3
ChrI	30831785	30832021	1,2,3
ChrI	30834088	30834823	1,2,3
ChrI	30851597	30851931	1,2,3
ChrI	30895431	30895669	1,2,3
ChrI	30906971	30907153	1,2,3
ChrI	30907922	30911962	1,2,3
ChrI	30937576	30937722	1,2,3
ChrI	30938466	30940216	1,2,3
ChrI	30950704	30951255	1,2,3
ChrI	30952350	30952879	1,2,3
ChrI	30955855	30956934	1,2,3
ChrI	30996097	30996290	1,2,3
ChrI	30998047	30998828	1,2,3
ChrI	31010906	31012286	1,2,3
ChrI	31014532	31014851	1,2,3
ChrI	31025225	31025857	1,2,3
ChrI	31027574	31027912	1,2,3
ChrI	31044265	31044585	1,2,3
ChrI	31050348	31050600	1,2,3
ChrI	31057184	31058288	1,2,3
ChrI	31066489	31066894	1,2,3
ChrI	31079591	31081568	1,2,3
ChrI	31088406	31089107	1,2,3
ChrI	31094769	31096312	1,2,3
ChrI	31112729	31113311	1,2,3
ChrI	31115147	31115435	1,2,3
ChrI	31121993	31122438	1,2,3
ChrI	31131715	31131732	1,2,3
ChrI	31134635	31134858	1,2,3
ChrI	31262499	31262947	1,2,3
ChrI	31263689	31263827	1,2,3
ChrI	31271361	31271907	1,2,3
ChrI	31273025	31273529	1,2,3
ChrI	31274276	31274389	1,2,3
ChrI	31287285	31288253	1,2,3
ChrI	31292262	31292763	1,2,3
ChrI	31295674	31295938	1,2,3
ChrI	31303538	31303905	1,2,3
ChrI	31304932	31305261	1,2,3
ChrI	31327975	31328386	1,2,3
ChrI	31329217	31332688	1,2,3
ChrI	31401141	31402130	1,2,3
ChrI	31425277	31425422	1,2,3
ChrI	31438924	31439241	1,2,3
ChrI	31440450	31441006	1,2,3
ChrI	31460239	31460340	1,2,3
ChrI	31471437	31472150	1,2,3
ChrI	31474174	31475583	1,2,3
ChrI	31479756	31479987	1,2,3
ChrI	31480673	31484534	1,2,3
ChrI	31487365	31487711	1,2,3
ChrI	31511842	31514293	1,2,3
ChrI	31518034	31518254	1,2,3
ChrI	31542675	31542856	1,2,3
ChrI	31543820	31544191	1,2,3
ChrI	31546082	31547706	1,2,3
ChrI	31549967	31549977	1,2,3
ChrI	31551192	31552218	1,2,3
ChrI	31553137	31553631	1,2,3
ChrI	31554373	31554842	1,2,3
ChrI	31589307	31590614	1,2,3
ChrI	31592079	31593806	1,2,3
ChrI	31595483	31595552	1,2,3
ChrI	31598096	31598871	1,2,3
ChrI	31606558	31607069	1,2,3
ChrI	31634267	31634848	1,2,3
ChrI	31659120	31659330	1,2,3
ChrI	31660164	31666168	1,2,3
ChrI	31667127	31667440	1,2,3
ChrI	31668717	31669050	1,2,3
ChrI	31724963	31725304	1,2,3
ChrI	31748267	31750129	1,2,3
ChrI	31751863	31751929	1,2,3
ChrI	31757390	31757992	1,2,3
ChrI	31759097	31759397	1,2,3
ChrI	31761688	31762085	1,2,3
ChrI	31764227	31764449	1,2,3
ChrI	31782910	31785210	1,2,3
ChrI	31797624	31798745	1,2,3
ChrI	31816524	31817956	1,2,3
ChrI	31844601	31845926	1,2,3
ChrI	31847047	31848287	1,2,3
ChrI	31856531	31856624	1,2,3
ChrI	31863347	31863357	1,2,3
ChrI	31872367	31873644	1,2,3
ChrI	31874570	31875029	1,2,3
ChrI	31876692	31877371	1,2,3
ChrI	31893771	31894432	1,2,3
ChrI	31917626	31918072	1,2,3
ChrI	31918734	31919496	1,2,3
ChrI	31921492	31923180	1,2,3
ChrI	31925005	31926350	1,2,3
ChrI	31942055	31942342	1,2,3
ChrI	31946566	31947333	1,2,3
ChrI	31954945	31955775	1,2,3
ChrI	31959161	31959928	1,2,3
ChrI	31967065	31967133	1,2,3
ChrI	31983957	31984422	1,2,3
ChrI	31991341	31991520	1,2,3
ChrI	31994357	31994531	1,2,3
ChrI	32000170	32002790	1,2,3
ChrI	32006056	32006850	1,2,3
ChrI	32008866	32009503	1,2,3
ChrI	32024107	32025733	1,2,3
ChrI	32026669	32027871	1,2,3
ChrI	32037707	32038431	1,2,3
ChrI	32058443	32059073	1,2,3
ChrI	32064840	32065457	1,2,3
ChrI	32067406	32068115	1,2,3
ChrI	32071340	32071525	1,2,3
ChrI	32072427	32073015	1,2,3
ChrI	32074055	32074764	1,2,3
ChrI	32077380	32077481	1,2,3
ChrI	32081455	32081792	1,2,3
ChrI	32082649	32083268	1,2,3
ChrI	32105464	32105721	1,2,3
ChrI	32117309	32117855	1,2,3
ChrI	32126354	32126939	1,2,3
ChrI	32129843	32130500	1,2,3
ChrI	32136387	32137005	1,2,3
ChrI	32163304	32163477	1,2,3
ChrI	32217296	32217486	1,2,3
ChrI	32231824	32232717	1,2,3
ChrI	32236946	32237610	1,2,3
ChrI	32238462	32239077	1,2,3
ChrI	32246697	32247650	1,2,3
ChrI	32252670	32252940	1,2,3
ChrI	32254690	32254773	1,2,3
ChrI	32261401	32261659	1,2,3
ChrI	32272735	32272950	1,2,3
ChrI	32300722	32300993	1,2,3
ChrI	32303560	32307388	1,2,3
ChrI	32308817	32310348	1,2,3
ChrI	32311097	32312231	1,2,3
ChrI	32313155	32313210	1,2,3
ChrI	32316445	32316786	1,2,3
ChrI	32396433	32396675	1,2,3
ChrI	32398601	32399591	1,2,3
ChrI	32410801	32411186	1,2,3
ChrI	32414530	32414926	1,2,3
ChrI	32558120	32559334	1,2,3
ChrI	32647301	32647952	1,2,3
ChrI	32648846	32650598	1,2,3
ChrI	32697703	32698103	1,2,3
ChrI	32705762	32707601	1,2,3
ChrI	32713559	32714137	1,2,3
ChrI	32720658	32724430	1,2,3
ChrI	32758233	32760417	1,2,3
ChrI	32761102	32762352	1,2,3
ChrI	32764580	32765463	1,2,3
ChrI	32767146	32767419	1,2,3
ChrI	32768278	32769530	1,2,3
ChrI	32871494	32872110	1,2,3
ChrI	32910467	32912335	1,2,3
ChrI	32933648	32934760	1,2,3
ChrI	32938881	32939191	1,2,3
ChrI	33003098	33003508	1,2,3
ChrI	33004253	33005032	1,2,3
ChrI	33015120	33016169	1,2,3
ChrI	33031395	33031605	1,2,3
ChrI	33046496	33046982	1,2,3
ChrI	33063944	33064243	1,2,3
ChrI	33067903	33068314	1,2,3
ChrI	33129749	33129887	1,2,3
ChrI	33184070	33186607	1,2,3
ChrI	33269656	33269849	1,2,3
ChrI	33275689	33276512	1,2,3
ChrI	33279298	33281027	1,2,3
ChrI	33305277	33306311	1,2,3
ChrI	33318931	33319282	1,2,3
ChrI	33322620	33323038	1,2,3
ChrI	33335286	33335496	1,2,3
ChrI	33337360	33338085	1,2,3
ChrI	33339474	33339679	1,2,3
ChrI	33346355	33347066	1,2,3
ChrI	33353730	33354200	1,2,3
ChrI	33377197	33377660	1,2,3
ChrI	33380002	33381406	1,2,3
ChrI	33384998	33386562	1,2,3
ChrI	33387700	33388240	1,2,3
ChrI	33392991	33393192	1,2,3
ChrI	33399134	33400827	1,2,3
ChrI	33401903	33403310	1,2,3
ChrI	33404044	33405410	1,2,3
ChrI	33406142	33408121	1,2,3
ChrI	33422747	33422923	1,2,3
ChrI	33423763	33423948	1,2,3
ChrI	33424797	33425040	1,2,3
ChrI	33429468	33429784	1,2,3
ChrI	33458389	33458642	1,2,3
ChrI	33469993	33470099	1,2,3
ChrI	33472540	33472934	1,2,3
ChrI	33509204	33509691	1,2,3
ChrI	33519095	33519101	1,2,3
ChrI	33531323	33532343	1,2,3
ChrI	33543195	33543433	1,2,3
ChrI	33549420	33549833	1,2,3
ChrI	33558127	33558690	1,2,3
ChrI	33574723	33575644	1,2,3
ChrI	33577176	33577913	1,2,3
ChrI	33580247	33582970	1,2,3
ChrI	33583771	33585214	1,2,3
ChrI	33586613	33588780	1,2,3
ChrI	33589770	33590004	1,2,3
ChrI	33595026	33595200	1,2,3
ChrI	33597535	33598181	1,2,3
ChrI	33602823	33603798	1,2,3
ChrI	33604611	33606347	1,2,3
ChrI	33633787	33634322	1,2,3
ChrI	33657730	33658304	1,2,3
ChrI	33659924	33660178	1,2,3
ChrI	33662367	33662369	1,2,3
ChrI	33664587	33665190	1,2,3
ChrI	33666725	33669187	1,2,3
ChrI	33670523	33671180	1,2,3
ChrI	33680124	33680480	1,2,3
ChrI	33691152	33691361	1,2,3
ChrI	33742057	33742721	1,2,3
ChrI	33751404	33751665	1,2,3
ChrI	33753591	33754398	1,2,3
ChrI	33757554	33758311	1,2,3
ChrI	33759011	33759506	1,2,3
ChrI	33809412	33810058	1,2,3
ChrI	33819140	33819470	1,2,3
ChrI	33820324	33821656	1,2,3
ChrI	33828997	33829307	1,2,3
ChrI	33836131	33836477	1,2,3
ChrI	33837376	33839401	1,2,3
ChrI	33840439	33841006	1,2,3
ChrI	33841838	33843973	1,2,3
ChrI	33844660	33845646	1,2,3
ChrI	33846371	33846683	1,2,3
ChrI	33849864	33850930	1,2,3
ChrI	33882141	33882892	1,2,3
ChrI	33958144	33958428	1,2,3
ChrI	33976538	33976639	1,2,3
ChrI	34006074	34006459	1,2,3
ChrI	34031751	34031974	1,2,3
ChrI	34102186	34102365	1,2,3
ChrI	34104151	34104941	1,2,3
ChrI	34204001	34205063	1,2,3
ChrI	34422633	34422990	1,2,3
ChrI	34479472	34479968	1,2,3
ChrI	34527704	34527806	1,2,3
ChrI	34545648	34546328	1,2,3
ChrI	34547347	34548154	1,2,3
ChrI	34549414	34550958	1,2,3
ChrI	34552744	34553062	1,2,3
ChrI	34598631	34598834	1,2,3
ChrI	34636581	34636864	1,2,3
ChrI	34637878	34638541	1,2,3
ChrI	34639550	34639884	1,2,3
ChrI	34672443	34673002	1,2,3
ChrI	34701145	34701471	1,2,3
ChrI	34710742	34711605	1,2,3
ChrI	34712461	34712707	1,2,3
ChrI	34714339	34714699	1,2,3
ChrI	34739774	34740882	1,2,3
ChrI	34770558	34770779	1,2,3
ChrI	34772707	34772963	1,2,3
ChrI	34775397	34776302	1,2,3
ChrI	34843634	34844237	1,2,3
ChrI	34900939	34901281	1,2,3
ChrI	34902317	34902698	1,2,3
ChrI	34903706	34903887	1,2,3
ChrI	34985769	34986167	1,2,3
ChrI	35195575	35196119	1,2,3
ChrI	35254395	35254668	1,2,3
ChrI	35265082	35265300	1,2,3
ChrI	35268057	35268817	1,2,3
ChrI	35269933	35271333	1,2,3
ChrI	35352706	35352857	1,2,3
ChrI	35459324	35461416	1,2,3
ChrI	35462610	35462976	1,2,3
ChrI	35491833	35492874	1,2,3
ChrI	35494528	35495017	1,2,3
ChrI	35497138	35498428	1,2,3
ChrI	35499461	35500858	1,2,3
ChrI	35540205	35540316	1,2,3
ChrI	35551740	35552574	1,2,3
ChrI	35554536	35554586	1,2,3
ChrI	35626719	35627061	1,2,3
ChrI	35627894	35628505	1,2,3
ChrI	35788632	35788778	1,2,3
ChrI	35868475	35869108	1,2,3
ChrI	35869815	35873274	1,2,3
ChrI	35874391	35875451	1,2,3
ChrI	35932130	35934590	1,2,3
ChrI	35966921	35967088	1,2,3
ChrI	36069703	36070026	1,2,3
ChrI	36233282	36233451	1,2,3
ChrI	36235085	36235103	1,2,3
ChrI	36236092	36237908	1,2,3
ChrI	36262875	36263525	1,2,3
ChrI	36273743	36274056	1,2,3
ChrI	36275118	36277061	1,2,3
ChrI	36277888	36281558	1,2,3
ChrI	36365229	36365644	1,2,3
ChrI	36465580	36465874	1,2,3
ChrI	36705641	36705998	1,2,3
ChrI	36706866	36707588	1,2,3
ChrI	36709070	36709559	1,2,3
ChrI	36717879	36718093	1,2,3
ChrI	37187497	37187524	1,2,3
ChrI	37371019	37371067	1,2,3
ChrI	37572784	37573056	1,2,3
ChrI	37733518	37733720	1,2,3
ChrI	37759484	37759705	1,2,3
ChrI	37762518	37762698	1,2,3
ChrI	37764682	37764782	1,2,3
ChrI	37783792	37784043	1,2,3
ChrI	37785615	37786270	1,2,3
ChrI	37787458	37787853	1,2,3
ChrI	37791743	37792230	1,2,3
ChrI	37842580	37843348	1,2,3
ChrI	37845098	37845565	1,2,3
ChrI	37859125	37859462	1,2,3
ChrI	37877300	37877494	1,2,3
ChrI	37925777	37926321	1,2,3
ChrI	37981884	37982874	1,2,3
ChrI	37998279	37998874	1,2,3
ChrI	38217566	38220451	1,2,3
ChrI	38429144	38429217	1,2,3
ChrI	38473774	38473940	1,2,3
ChrI	38551656	38553387	1,2,3
ChrI	38555122	38555255	1,2,3
ChrI	38557610	38557945	1,2,3
ChrI	38708270	38710049	1,2,3
ChrI	38722929	38723097	1,2,3
ChrI	38916510	38916703	1,2,3
ChrI	38953633	38953726	1,2,3
ChrI	38955335	38955770	1,2,3
ChrI	38964769	38965765	1,2,3
ChrI	39044589	39045879	1,2,3
ChrI	39046632	39048903	1,2,3
ChrI	39097957	39098103	1,2,3
ChrI	39099047	39100944	1,2,3
ChrI	39108199	39108384	1,2,3
ChrI	39109548	39111138	1,2,3
ChrI	39111892	39112120	1,2,3
ChrI	39128859	39129513	1,2,3
ChrI	39160213	39160584	1,2,3
ChrI	39175457	39176293	1,2,3
ChrI	39191545	39191712	1,2,3
ChrI	39201897	39202633	1,2,3
ChrI	39204273	39204275	1,2,3
ChrI	39224464	39225020	1,2,3
ChrI	39229491	39229812	1,2,3
ChrI	39250315	39250375	1,2,3
ChrI	39300491	39300789	1,2,3
ChrI	39367437	39368028	1,2,3
ChrI	39446717	39446769	1,2,3
ChrI	39511591	39512968	1,2,3
ChrI	39520552	39521790	1,2,3
ChrII	816	1285	1,2,3
ChrII	29496	29854	1,2,3
ChrII	79373	79846	1,2,3
ChrII	81682	82000	1,2,3
ChrII	83126	84271	1,2,3
ChrII	85936	86233	1,2,3
ChrII	90434	90751	1,2,3
ChrII	97065	97372	1,2,3
ChrII	99178	99440	1,2,3
ChrII	119792	120101	1,2,3
ChrII	120864	121933	1,2,3
ChrII	128842	129453	1,2,3
ChrII	131143	131448	1,2,3
ChrII	187495	188282	1,2,3
ChrII	225220	225512	1,2,3
ChrII	226452	226999	1,2,3
ChrII	279216	279473	1,2,3
ChrII	382230	383743	1,2,3
ChrII	395013	395199	1,2,3
ChrII	414734	414971	1,2,3
ChrII	429501	429965	1,2,3
ChrII	432454	433009	1,2,3
ChrII	442737	442828	1,2,3
ChrII	460424	460881	1,2,3
ChrII	567340	567396	1,2,3
ChrII	568911	569099	1,2,3
ChrII	571951	572379	1,2,3
ChrII	872568	873178	1,2,3
ChrII	1078018	1078228	1,2,3
ChrII	1079849	1080371	1,2,3
ChrII	1186249	1187314	1,2,3
ChrII	1191436	1191766	1,2,3
ChrII	1237377	1237936	1,2,3
ChrII	1336228	1336312	1,2,3
ChrII	1475463	1476092	1,2,3
ChrII	1477207	1477392	1,2,3
ChrII	1478280	1479066	1,2,3
ChrII	1481746	1482033	1,2,3
ChrII	1636863	1637559	1,2,3
ChrII	1906950	1908309	1,2,3
ChrII	1948410	1948597	1,2,3
ChrII	2011370	2011558	1,2,3
ChrII	2040996	2042175	1,2,3
ChrII	2626759	2627169	1,2,3
ChrII	3331462	3331671	1,2,3
ChrII	3333148	3333579	1,2,3
ChrII	3359105	3359712	1,2,3
ChrII	3410401	3410655	1,2,3
ChrII	3726611	3726811	1,2,3
ChrII	3836582	3836814	1,2,3
ChrII	3997562	3997620	1,2,3
ChrII	3998709	3999086	1,2,3
ChrII	4006574	4006799	1,2,3
ChrII	4015102	4015409	1,2,3
ChrII	4230838	4231444	1,2,3
ChrII	4341648	4342443	1,2,3
ChrII	4676584	4677120	1,2,3
ChrII	5017044	5017337	1,2,3
ChrII	5264840	5264979	1,2,3
ChrII	5268022	5268168	1,2,3
ChrII	5274376	5274920	1,2,3
ChrII	5280569	5281476	1,2,3
ChrII	5282392	5283804	1,2,3
ChrII	5711110	5711249	1,2,3
ChrII	5864248	5864532	1,2,3
ChrII	5978060	5978552	1,2,3
ChrII	5979283	5979322	1,2,3
ChrII	6062411	6062631	1,2,3
ChrII	6065891	6066074	1,2,3
ChrII	6067443	6067669	1,2,3
ChrII	6127803	6128283	1,2,3
ChrII	6273073	6273855	1,2,3
ChrII	6282841	6283375	1,2,3
ChrII	6290308	6291181	1,2,3
ChrII	6356695	6356796	1,2,3
ChrII	6460812	6461377	1,2,3
ChrII	6523493	6524558	1,2,3
ChrII	6525959	6526547	1,2,3
ChrII	6528402	6529715	1,2,3
ChrII	6530681	6530772	1,2,3
ChrII	6533138	6533731	1,2,3
ChrII	6534564	6534875	1,2,3
ChrII	6751897	6752999	1,2,3
ChrII	6753826	6754594	1,2,3
ChrII	6879990	6880175	1,2,3
ChrII	6943846	6944279	1,2,3
ChrII	6974920	6975212	1,2,3
ChrII	6980599	6980841	1,2,3
ChrII	6981699	6982512	1,2,3
ChrII	6983360	6984626	1,2,3
ChrII	6985415	6985816	1,2,3
ChrII	7054866	7055063	1,2,3
ChrII	7190007	7191046	1,2,3
ChrII	7192086	7192845	1,2,3
ChrII	7194256	7194430	1,2,3
ChrII	7225662	7225932	1,2,3
ChrII	7228218	7229048	1,2,3
ChrII	7267885	7268850	1,2,3
ChrII	7269782	7272346	1,2,3
ChrII	7397343	7397523	1,2,3
ChrII	7444398	7445013	1,2,3
ChrII	7563200	7563639	1,2,3
ChrII	7582013	7582426	1,2,3
ChrII	7602222	7602430	1,2,3
ChrII	7682967	7683259	1,2,3
ChrII	7796915	7797235	1,2,3
ChrII	7846287	7846712	1,2,3
ChrII	7847821	7847999	1,2,3
ChrII	7859775	7860100	1,2,3
ChrII	7862915	7863949	1,2,3
ChrII	7866508	7866844	1,2,3
ChrII	7884373	7885307	1,2,3
ChrII	7916092	7916355	1,2,3
ChrII	7919854	7920891	1,2,3
ChrII	7931806	7932379	1,2,3
ChrII	7934566	7935235	1,2,3
ChrII	7947964	7948354	1,2,3
ChrII	7972938	7974162	1,2,3
ChrII	7975014	7975617	1,2,3
ChrII	7976823	7976994	1,2,3
ChrII	8027670	8028663	1,2,3
ChrII	8047526	8047751	1,2,3
ChrII	8095507	8095867	1,2,3
ChrII	8141577	8141775	1,2,3
ChrII	8187480	8188227	1,2,3
ChrII	8248613	8249368	1,2,3
ChrII	8266218	8268815	1,2,3
ChrII	8368493	8368688	1,2,3
ChrII	8369798	8369911	1,2,3
ChrII	8401660	8403033	1,2,3
ChrII	8403897	8404079	1,2,3
ChrII	8405527	8405722	1,2,3
ChrII	8406385	8406554	1,2,3
ChrII	8411950	8413139	1,2,3
ChrII	8424408	8425576	1,2,3
ChrII	8426556	8427615	1,2,3
ChrII	8428502	8431892	1,2,3
ChrII	8439549	8439963	1,2,3
ChrII	8483555	8483826	1,2,3
ChrII	8488014	8488651	1,2,3
ChrII	8620558	8620827	1,2,3
ChrII	8630541	8630693	1,2,3
ChrII	8631634	8632184	1,2,3
ChrII	8638399	8638928	1,2,3
ChrII	8742336	8743530	1,2,3
ChrII	8783809	8784896	1,2,3
ChrII	8900776	8901197	1,2,3
ChrII	8909630	8909653	1,2,3
ChrII	8949762	8949911	1,2,3
ChrII	8954131	8955870	1,2,3
ChrII	8959342	8959987	1,2,3
ChrII	8963986	8964989	1,2,3
ChrII	8973200	8973302	1,2,3
ChrII	9024131	9024471	1,2,3
ChrII	9050735	9050896	1,2,3
ChrII	9058197	9061531	1,2,3
ChrII	9062526	9063977	1,2,3
ChrII	9068478	9069710	1,2,3
ChrII	9070649	9073008	1,2,3
ChrII	9075082	9076292	1,2,3
ChrII	9079325	9080153	1,2,3
ChrII	9080848	9084179	1,2,3
ChrII	9085841	9086716	1,2,3
ChrII	9094646	9098215	1,2,3
ChrII	9104112	9104351	1,2,3
ChrII	9120186	9120815	1,2,3
ChrII	9204487	9208914	1,2,3
ChrII	9270983	9271321	1,2,3
ChrII	9280132	9280156	1,2,3
ChrII	9326254	9327108	1,2,3
ChrII	9327767	9327967	1,2,3
ChrII	9399618	9399774	1,2,3
ChrII	9429646	9430404	1,2,3
ChrII	9450399	9451053	1,2,3
ChrII	9460204	9460509	1,2,3
ChrII	9461522	9462332	1,2,3
ChrII	9464279	9465016	1,2,3
ChrII	9467349	9468978	1,2,3
ChrII	9470374	9472735	1,2,3
ChrII	9488025	9488252	1,2,3
ChrII	9505043	9505460	1,2,3
ChrII	9526371	9526896	1,2,3
ChrII	9527633	9538439	1,2,3
ChrII	9539115	9540052	1,2,3
ChrII	9542597	9543348	1,2,3
ChrII	9549070	9549898	1,2,3
ChrII	9550975	9551305	1,2,3
ChrII	9552071	9554145	1,2,3
ChrII	9558750	9559040	1,2,3
ChrII	9569200	9570043	1,2,3
ChrII	9582073	9582258	1,2,3
ChrII	9607683	9607687	1,2,3
ChrII	9665548	9665864	1,2,3
ChrII	9686509	9687853	1,2,3
ChrII	9689611	9690212	1,2,3
ChrII	9693370	9693606	1,2,3
ChrII	9715069	9716545	1,2,3
ChrII	9717225	9718075	1,2,3
ChrII	9718924	9719246	1,2,3
ChrII	9720638	9721177	1,2,3
ChrII	9741934	9742359	1,2,3
ChrII	9750443	9751379	1,2,3
ChrII	9752231	9753083	1,2,3
ChrII	9770777	9771226	1,2,3
ChrII	9772674	9774473	1,2,3
ChrII	9819995	9820089	1,2,3
ChrII	9832688	9833368	1,2,3
ChrII	9834508	9835502	1,2,3
ChrII	9836205	9836993	1,2,3
ChrII	9837674	9838093	1,2,3
ChrII	9839285	9839368	1,2,3
ChrII	9840331	9840481	1,2,3
ChrII	9842184	9842952	1,2,3
ChrII	9853919	9855053	1,2,3
ChrII	9859594	9859968	1,2,3
ChrII	9863216	9863595	1,2,3
ChrII	9879061	9879244	1,2,3
ChrII	9894388	9894822	1,2,3
ChrII	9898517	9899453	1,2,3
ChrII	9902351	9902748	1,2,3
ChrII	9907387	9908320	1,2,3
ChrII	9908988	9912903	1,2,3
ChrII	9937679	9937847	1,2,3
ChrII	9946506	9948374	1,2,3
ChrII	9958157	9958985	1,2,3
ChrII	9985812	9986554	1,2,3
ChrII	9989432	9989753	1,2,3
ChrII	9995515	9995533	1,2,3
ChrII	10017143	10022346	1,2,3
ChrII	10024000	10026552	1,2,3
ChrII	10028732	10028994	1,2,3
ChrII	10031302	10032122	1,2,3
ChrII	10033022	10033975	1,2,3
ChrII	10036443	10037817	1,2,3
ChrII	10038864	10039848	1,2,3
ChrII	10040727	10042009	1,2,3
ChrII	10053927	10054595	1,2,3
ChrII	10055506	10056583	1,2,3
ChrII	10057436	10057628	1,2,3
ChrII	10058609	10059379	1,2,3
ChrII	10060588	10061018	1,2,3
ChrII	10087735	10090044	1,2,3
ChrII	10092177	10093259	1,2,3
ChrII	10105548	10106186	1,2,3
ChrII	10109137	10109422	1,2,3
ChrII	10115283	10116127	1,2,3
ChrII	10123416	10123709	1,2,3
ChrII	10125008	10125209	1,2,3
ChrII	10127558	10129328	1,2,3
ChrII	10144354	10144849	1,2,3
ChrII	10147145	10147735	1,2,3
ChrII	10152043	10152331	1,2,3
ChrII	10155758	10155853	1,2,3
ChrII	10159149	10159464	1,2,3
ChrII	10164425	10165106	1,2,3
ChrII	10165814	10166547	1,2,3
ChrII	10167526	10169309	1,2,3
ChrII	10172920	10173941	1,2,3
ChrII	10175949	10176599	1,2,3
ChrII	10193911	10195265	1,2,3
ChrII	10196728	10196962	1,2,3
ChrII	10202561	10203057	1,2,3
ChrII	10219076	10219464	1,2,3
ChrII	10224228	10224457	1,2,3
ChrII	10230517	10230527	1,2,3
ChrII	10233078	10233256	1,2,3
ChrII	10235158	10235894	1,2,3
ChrII	10256164	10256895	1,2,3
ChrII	10259383	10260352	1,2,3
ChrII	10264322	10265367	1,2,3
ChrII	10280733	10281234	1,2,3
ChrII	10283186	10283456	1,2,3
ChrII	10294508	10294913	1,2,3
ChrII	10297619	10298102	1,2,3
ChrII	10299751	10300272	1,2,3
ChrII	10305105	10305247	1,2,3
ChrII	10308705	10309105	1,2,3
ChrII	10312694	10313313	1,2,3
ChrII	10314606	10315153	1,2,3
ChrII	10316295	10317013	1,2,3
ChrII	10318800	10319950	1,2,3
ChrII	10321166	10321369	1,2,3
ChrII	10326167	10327440	1,2,3
ChrII	10386342	10387134	1,2,3
ChrII	10389880	10390344	1,2,3
ChrII	10392477	10393069	1,2,3
ChrII	10409711	10409994	1,2,3
ChrII	10411188	10411914	1,2,3
ChrII	10416420	10417088	1,2,3
ChrII	10420107	10420292	1,2,3
ChrII	10435032	10435270	1,2,3
ChrII	10437020	10437427	1,2,3
ChrII	10446736	10447074	1,2,3
ChrII	10449999	10450446	1,2,3
ChrII	10455219	10455317	1,2,3
ChrII	10461512	10461839	1,2,3
ChrII	10477838	10479480	1,2,3
ChrII	10483705	10484481	1,2,3
ChrII	10486584	10486880	1,2,3
ChrII	10487651	10490837	1,2,3
ChrII	10495122	10496718	1,2,3
ChrII	10497506	10497825	1,2,3
ChrII	10501419	10502111	1,2,3
ChrII	10508200	10508772	1,2,3
ChrII	10511322	10512363	1,2,3
ChrII	10527367	10527766	1,2,3
ChrII	10529930	10530204	1,2,3
ChrII	10538326	10538668	1,2,3
ChrII	10544424	10546041	1,2,3
ChrII	10548221	10548301	1,2,3
ChrII	10557175	10557585	1,2,3
ChrII	10558741	10559497	1,2,3
ChrII	10564235	10564459	1,2,3
ChrII	10567548	10568293	1,2,3
ChrII	10574277	10574785	1,2,3
ChrII	10595488	10596479	1,2,3
ChrII	10616452	10617012	1,2,3
ChrII	10618101	10620479	1,2,3
ChrII	10622646	10622826	1,2,3
ChrII	10626153	10627540	1,2,3
ChrII	10628599	10630221	1,2,3
ChrII	10630942	10631575	1,2,3
ChrII	10634671	10635313	1,2,3
ChrII	10640193	10640711	1,2,3
ChrII	10654049	10655856	1,2,3
ChrII	10656572	10658389	1,2,3
ChrII	10660537	10660768	1,2,3
ChrII	10664637	10665176	1,2,3
ChrII	10668307	10668635	1,2,3
ChrII	10681787	10682750	1,2,3
ChrII	10691378	10691632	1,2,3
ChrII	10693111	10693723	1,2,3
ChrII	10695253	10697883	1,2,3
ChrII	10698741	10699946	1,2,3
ChrII	10702861	10703505	1,2,3
ChrII	10713164	10714160	1,2,3
ChrII	10715952	10716168	1,2,3
ChrII	10722063	10722213	1,2,3
ChrII	10724988	10726034	1,2,3
ChrII	10726721	10728268	1,2,3
ChrII	10730596	10730791	1,2,3
ChrII	10784860	10785260	1,2,3
ChrII	10788886	10789944	1,2,3
ChrII	10793344	10793756	1,2,3
ChrII	10795916	10796134	1,2,3
ChrII	10799907	10801023	1,2,3
ChrII	10804183	10804897	1,2,3
ChrII	10811979	10812389	1,2,3
ChrII	10813196	10814710	1,2,3
ChrII	10824658	10824895	1,2,3
ChrII	10825783	10826107	1,2,3
ChrII	10828465	10828821	1,2,3
ChrII	10829728	10830330	1,2,3
ChrII	10833234	10833447	1,2,3
ChrII	10839375	10839793	1,2,3
ChrII	10841024	10841608	1,2,3
ChrII	10842616	10843656	1,2,3
ChrII	10848384	10849174	1,2,3
ChrII	10850321	10851373	1,2,3
ChrII	10853362	10854208	1,2,3
ChrII	10855152	10857134	1,2,3
ChrII	10862274	10865309	1,2,3
ChrII	10870708	10871115	1,2,3
ChrII	10885523	10885896	1,2,3
ChrII	10892730	10893681	1,2,3
ChrII	10903353	10903998	1,2,3
ChrII	10910910	10911510	1,2,3
ChrII	10917658	10918000	1,2,3
ChrII	10919719	10919963	1,2,3
ChrII	10924988	10925692	1,2,3
ChrII	10933317	10933441	1,2,3
ChrII	10939791	10940021	1,2,3
ChrII	10958181	10959021	1,2,3
ChrII	10968312	10969117	1,2,3
ChrII	10982072	10982818	1,2,3
ChrII	10983797	10984145	1,2,3
ChrII	10986966	10987763	1,2,3
ChrII	10990335	10991941	1,2,3
ChrII	10992691	10993329	1,2,3
ChrII	10997200	10997694	1,2,3
ChrII	10999717	11000087	1,2,3
ChrII	11003843	11004040	1,2,3
ChrII	11009297	11009524	1,2,3
ChrII	11018639	11020173	1,2,3
ChrII	11021119	11022019	1,2,3
ChrII	11025869	11026788	1,2,3
ChrII	11029678	11031281	1,2,3
ChrII	11078267	11078974	1,2,3
ChrII	11080916	11081196	1,2,3
ChrII	11083006	11083763	1,2,3
ChrII	11104341	11104628	1,2,3
ChrII	11107946	11108377	1,2,3
ChrII	11109461	11111331	1,2,3
ChrII	11112038	11112255	1,2,3
ChrII	11124850	11125182	1,2,3
ChrII	11125846	11125860	1,2,3
ChrII	11129143	11129503	1,2,3
ChrII	11130787	11131373	1,2,3
ChrII	11132225	11132595	1,2,3
ChrII	11133853	11136013	1,2,3
ChrII	11138311	11138583	1,2,3
ChrII	11142882	11143990	1,2,3
ChrII	11146647	11150537	1,2,3
ChrII	11160299	11160941	1,2,3
ChrII	11213239	11216293	1,2,3
ChrII	11217247	11218000	1,2,3
ChrII	11225959	11226169	1,2,3
ChrII	11233383	11233936	1,2,3
ChrII	11246312	11246450	1,2,3
ChrII	11251694	11252385	1,2,3
ChrII	11256606	11256955	1,2,3
ChrII	11258574	11259191	1,2,3
ChrII	11262592	11263832	1,2,3
ChrII	11269954	11270511	1,2,3
ChrII	11318551	11318868	1,2,3
ChrII	11326484	11326893	1,2,3
ChrII	11334455	11334686	1,2,3
ChrII	11336549	11336700	1,2,3
ChrII	11337461	11339108	1,2,3
ChrII	11340220	11341080	1,2,3
ChrII	11353001	11353379	1,2,3
ChrII	11355918	11357144	1,2,3
ChrII	11358898	11359068	1,2,3
ChrII	11363067	11363322	1,2,3
ChrII	11375168	11375371	1,2,3
ChrII	11402472	11404005	1,2,3
ChrII	11405633	11406118	1,2,3
ChrII	11406945	11407180	1,2,3
ChrII	11407901	11409085	1,2,3
ChrII	11411988	11413441	1,2,3
ChrII	11415198	11415576	1,2,3
ChrII	11418008	11418333	1,2,3
ChrII	11437615	11438179	1,2,3
ChrII	11501550	11501770	1,2,3
ChrII	11513993	11514164	1,2,3
ChrII	11515790	11516035	1,2,3
ChrII	11516765	11517127	1,2,3
ChrII	11528466	11530206	1,2,3
ChrII	11533046	11533398	1,2,3
ChrII	11549590	11549742	1,2,3
ChrII	11557975	11559179	1,2,3
ChrII	11569428	11570129	1,2,3
ChrII	11581778	11582247	1,2,3
ChrII	11585271	11585440	1,2,3
ChrII	11586992	11587236	1,2,3
ChrII	11588278	11588992	1,2,3
ChrII	11595535	11596172	1,2,3
ChrII	11598213	11599458	1,2,3
ChrII	11601576	11601900	1,2,3
ChrII	11609489	11609609	1,2,3
ChrII	11630992	11631779	1,2,3
ChrII	11642963	11643509	1,2,3
ChrII	11662291	11662528	1,2,3
ChrII	11667207	11667788	1,2,3
ChrII	11673456	11674910	1,2,3
ChrII	11677865	11680137	1,2,3
ChrII	11693640	11693868	1,2,3
ChrII	11698266	11700362	1,2,3
ChrII	11703023	11703590	1,2,3
ChrII	11709860	11710555	1,2,3
ChrII	11712425	11714455	1,2,3
ChrII	11718897	11719297	1,2,3
ChrII	11721952	11722822	1,2,3
ChrII	11754720	11754953	1,2,3
ChrII	11761497	11762054	1,2,3
ChrII	11763279	11763509	1,2,3
ChrII	11779548	11780266	1,2,3
ChrII	11789645	11790007	1,2,3
ChrII	11799219	11800414	1,2,3
ChrII	11803492	11803686	1,2,3
ChrII	11806089	11806381	1,2,3
ChrII	11808725	11809055	1,2,3
ChrII	11810294	11810844	1,2,3
ChrII	11814405	11814835	1,2,3
ChrII	11817471	11818062	1,2,3
ChrII	11818820	11819173	1,2,3
ChrII	11824113	11824706	1,2,3
ChrII	11829560	11830492	1,2,3
ChrII	11832676	11832815	1,2,3
ChrII	11846843	11847206	1,2,3
ChrII	11849117	11849695	1,2,3
ChrII	11851507	11851680	1,2,3
ChrII	11853662	11854025	1,2,3
ChrII	11878826	11878889	1,2,3
ChrII	11888157	11888297	1,2,3
ChrII	11889820	11890243	1,2,3
ChrII	11897682	11899666	1,2,3
ChrII	11901372	11903145	1,2,3
ChrII	11905528	11906237	1,2,3
ChrII	11911036	11911330	1,2,3
ChrII	11912431	11912563	1,2,3
ChrII	11914192	11917345	1,2,3
ChrII	11920560	11920750	1,2,3
ChrII	11995398	11995491	1,2,3
ChrII	12001694	12002768	1,2,3
ChrII	12006886	12006930	1,2,3
ChrII	12007614	12008182	1,2,3
ChrII	12012848	12013069	1,2,3
ChrII	12016101	12018093	1,2,3
ChrII	12058972	12061630	1,2,3
ChrII	12062425	12063848	1,2,3
ChrII	12100612	12101894	1,2,3
ChrII	12103760	12104136	1,2,3
ChrII	12104905	12105210	1,2,3
ChrII	12112370	12112810	1,2,3
ChrII	12113531	12113857	1,2,3
ChrII	12127160	12127599	1,2,3
ChrII	12132254	12132519	1,2,3
ChrII	12136694	12136997	1,2,3
ChrII	12139645	12142785	1,2,3
ChrII	12143774	12144011	1,2,3
ChrII	12144719	12145038	1,2,3
ChrII	12146793	12147323	1,2,3
ChrII	12149673	12150279	1,2,3
ChrII	12154171	12154679	1,2,3
ChrII	12170315	12172476	1,2,3
ChrII	12194596	12195035	1,2,3
ChrII	12197557	12199172	1,2,3
ChrII	12206025	12207106	1,2,3
ChrII	12208064	12209000	1,2,3
ChrII	12211557	12212310	1,2,3
ChrII	12226811	12227723	1,2,3
ChrII	12232191	12232227	1,2,3
ChrII	12283308	12283883	1,2,3
ChrII	12296475	12297510	1,2,3
ChrII	12305073	12307169	1,2,3
ChrII	12313669	12313901	1,2,3
ChrII	12337617	12337719	1,2,3
ChrII	12338741	12339204	1,2,3
ChrII	12364877	12366781	1,2,3
ChrII	12367874	12369222	1,2,3
ChrII	12383694	12383699	1,2,3
ChrII	12385881	12386826	1,2,3
ChrII	12387498	12387724	1,2,3
ChrII	12389433	12389747	1,2,3
ChrII	12392235	12393615	1,2,3
ChrII	12395235	12395835	1,2,3
ChrII	12398594	12398825	1,2,3
ChrII	12407104	12408110	1,2,3
ChrII	12408931	12410265	1,2,3
ChrII	12411139	12411559	1,2,3
ChrII	12413172	12414120	1,2,3
ChrII	12418673	12419138	1,2,3
ChrII	12421711	12422372	1,2,3
ChrII	12424036	12424421	1,2,3
ChrII	12426288	12427008	1,2,3
ChrII	12442945	12443957	1,2,3
ChrII	12445103	12446081	1,2,3
ChrII	12462364	12463720	1,2,3
ChrII	12496103	12496649	1,2,3
ChrII	12509365	12510632	1,2,3
ChrII	12525869	12526035	1,2,3
ChrII	12527246	12527823	1,2,3
ChrII	12529783	12530502	1,2,3
ChrII	12532824	12532879	1,2,3
ChrII	12542459	12543018	1,2,3
ChrII	12549710	12550190	1,2,3
ChrII	12555991	12556195	1,2,3
ChrII	12557353	12558658	1,2,3
ChrII	12559333	12561475	1,2,3
ChrII	12570523	12571561	1,2,3
ChrII	12573601	12574302	1,2,3
ChrII	12584476	12584663	1,2,3
ChrII	12585543	12585784	1,2,3
ChrII	12586948	12587499	1,2,3
ChrII	12588460	12590930	1,2,3
ChrII	12592269	12594120	1,2,3
ChrII	12595006	12595503	1,2,3
ChrII	12602786	12603871	1,2,3
ChrII	12604596	12604841	1,2,3
ChrII	12605578	12606445	1,2,3
ChrII	12627940	12628493	1,2,3
ChrII	12630209	12630703	1,2,3
ChrII	12633958	12634320	1,2,3
ChrII	12641423	12643022	1,2,3
ChrII	12644768	12645815	1,2,3
ChrII	12648010	12648626	1,2,3
ChrII	12652529	12652804	1,2,3
ChrII	12656155	12656320	1,2,3
ChrII	12659346	12661216	1,2,3
ChrII	12662434	12664149	1,2,3
ChrII	12664959	12665637	1,2,3
ChrII	12674971	12679017	1,2,3
ChrII	12686791	12688529	1,2,3
ChrII	12709476	12710190	1,2,3
ChrII	12711799	12712605	1,2,3
ChrII	12720235	12720593	1,2,3
ChrII	12724521	12725115	1,2,3
ChrII	12725907	12726288	1,2,3
ChrII	12748470	12749506	1,2,3
ChrII	12752458	12753309	1,2,3
ChrII	12754689	12755663	1,2,3
ChrII	12760461	12760740	1,2,3
ChrII	12771248	12771939	1,2,3
ChrII	12779815	12780345	1,2,3
ChrII	12781413	12781438	1,2,3
ChrII	12785556	12786089	1,2,3
ChrII	12787388	12787737	1,2,3
ChrII	12808236	12808362	1,2,3
ChrII	12816435	12818600	1,2,3
ChrII	12825278	12827376	1,2,3
ChrII	12835567	12835887	1,2,3
ChrII	12840593	12840764	1,2,3
ChrII	12841447	12841929	1,2,3
ChrII	12842653	12844041	1,2,3
ChrII	12885697	12886226	1,2,3
ChrII	12888076	12888583	1,2,3
ChrII	12889396	12890938	1,2,3
ChrII	12896483	12897110	1,2,3
ChrII	12901812	12903099	1,2,3
ChrII	12904383	12905907	1,2,3
ChrII	12908027	12908466	1,2,3
ChrII	12913655	12914256	1,2,3
ChrII	12915258	12916034	1,2,3
ChrII	12916759	12919024	1,2,3
ChrII	12922393	12922825	1,2,3
ChrII	12928951	12930349	1,2,3
ChrII	12963244	12963879	1,2,3
ChrII	12967974	12968271	1,2,3
ChrII	12981119	12982011	1,2,3
ChrII	12982947	12982983	1,2,3
ChrII	12986687	12987391	1,2,3
ChrII	12992356	12992570	1,2,3
ChrII	13161263	13162111	1,2,3
ChrII	13180286	13181926	1,2,3
ChrII	13183815	13185595	1,2,3
ChrII	13209917	13209918	1,2,3
ChrII	13219614	13220342	1,2,3
ChrII	13306264	13306369	1,2,3
ChrII	13345401	13346065	1,2,3
ChrII	13400529	13401015	1,2,3
ChrII	13460984	13461384	1,2,3
ChrII	13467502	13467605	1,2,3
ChrII	13500024	13500143	1,2,3
ChrII	13523197	13524115	1,2,3
ChrII	13525917	13526093	1,2,3
ChrII	13527282	13527961	1,2,3
ChrII	13550412	13551098	1,2,3
ChrII	13552988	13554617	1,2,3
ChrII	13570788	13571681	1,2,3
ChrII	13613401	13615486	1,2,3
ChrII	13616385	13616756	1,2,3
ChrII	13626096	13627923	1,2,3
ChrII	13641170	13641598	1,2,3
ChrII	13647395	13648111	1,2,3
ChrII	13651445	13651547	1,2,3
ChrII	13655892	13656082	1,2,3
ChrII	13657121	13657978	1,2,3
ChrII	13724722	13725568	1,2,3
ChrII	13736142	13736324	1,2,3
ChrII	13739047	13739628	1,2,3
ChrII	13749767	13750646	1,2,3
ChrII	13775680	13775946	1,2,3
ChrII	13784565	13786311	1,2,3
ChrII	13807417	13807852	1,2,3
ChrII	13839252	13839338	1,2,3
ChrII	13867748	13869357	1,2,3
ChrII	13870557	13871014	1,2,3
ChrII	13873862	13874044	1,2,3
ChrII	13877572	13877989	1,2,3
ChrII	13880558	13881043	1,2,3
ChrII	13920203	13920573	1,2,3
ChrII	13922197	13922490	1,2,3
ChrII	13942361	13942878	1,2,3
ChrII	13952808	13953316	1,2,3
ChrII	13968420	13968859	1,2,3
ChrII	13971426	13972568	1,2,3
ChrII	13974501	13975189	1,2,3
ChrII	13980716	13980948	1,2,3
ChrII	13981974	13983208	1,2,3
ChrII	13984116	13984872	1,2,3
ChrII	13995481	13995844	1,2,3
ChrII	14008440	14009135	1,2,3
ChrII	14044990	14045179	1,2,3
ChrII	14082688	14082875	1,2,3
ChrII	14087767	14088340	1,2,3
ChrII	14115627	14116733	1,2,3
ChrII	14123068	14125137	1,2,3
ChrII	14125840	14125942	1,2,3
ChrII	14129646	14130140	1,2,3
ChrII	14175214	14175888	1,2,3
ChrII	14188824	14189496	1,2,3
ChrII	14190348	14191645	1,2,3
ChrII	14193473	14195563	1,2,3
ChrII	14196701	14197934	1,2,3
ChrII	14198780	14199540	1,2,3
ChrII	14280532	14281381	1,2,3
ChrII	14292113	14292372	1,2,3
ChrII	14320165	14320520	1,2,3
ChrII	14444158	14444361	1,2,3
ChrII	14514271	14514990	1,2,3
ChrII	14594289	14594494	1,2,3
ChrII	14615255	14615486	1,2,3
ChrII	14616193	14616999	1,2,3
ChrII	14620659	14621406	1,2,3
ChrII	14664624	14665047	1,2,3
ChrII	14677286	14677716	1,2,3
ChrII	14687676	14687947	1,2,3
ChrII	14744368	14745034	1,2,3
ChrII	14747635	14747751	1,2,3
ChrII	14785551	14788373	1,2,3
ChrII	14800143	14800339	1,2,3
ChrII	14801477	14801791	1,2,3
ChrII	14805316	14805622	1,2,3
ChrII	14817743	14818902	1,2,3
ChrII	14875649	14876610	1,2,3
ChrII	14881190	14882139	1,2,3
ChrII	14910229	14910378	1,2,3
ChrII	15098373	15099912	1,2,3
ChrII	15117556	15117811	1,2,3
ChrII	15188228	15188892	1,2,3
ChrII	15225383	15225401	1,2,3
ChrII	15226162	15226557	1,2,3
ChrII	15257729	15258207	1,2,3
ChrII	15305387	15306085	1,2,3
ChrII	15307433	15307858	1,2,3
ChrII	15346226	15346890	1,2,3
ChrII	15469583	15470573	1,2,3
ChrII	15471471	15471827	1,2,3
ChrII	15488523	15489132	1,2,3
ChrII	15492117	15492727	1,2,3
ChrII	15493397	15493576	1,2,3
ChrII	15583455	15584284	1,2,3
ChrII	15609659	15609920	1,2,3
ChrII	15610723	15610917	1,2,3
ChrII	15611597	15611957	1,2,3
ChrII	15646109	15647100	1,2,3
ChrII	15650313	15650483	1,2,3
ChrII	15690972	15692353	1,2,3
ChrII	15724298	15724506	1,2,3
ChrII	15827144	15827453	1,2,3
ChrII	15828362	15828554	1,2,3
[truncated: 18,135 more rows]

## Sheet: H3K27ac
Chr	start	stop
ChrI	247	556
ChrI	9926	10125
ChrI	51599	55371
ChrI	58447	64241
ChrI	121908	123644
ChrI	134851	135875
ChrI	137298	141510
ChrI	146905	147398
ChrI	148349	149396
ChrI	163898	170551
ChrI	178096	179247
ChrI	180534	183155
ChrI	184730	186044
ChrI	193091	198563
ChrI	210713	210893
ChrI	213067	215549
ChrI	220721	224729
ChrI	225569	230862
ChrI	269500	271884
ChrI	297062	298208
ChrI	300531	302445
ChrI	303966	308039
ChrI	340387	346125
ChrI	350686	353688
ChrI	354473	355918
ChrI	415721	425360
ChrI	428743	429518
ChrI	430913	433191
ChrI	434048	434409
ChrI	447070	448142
ChrI	510082	511191
ChrI	528301	529330
ChrI	530290	532798
ChrI	536332	536950
ChrI	537720	541606
ChrI	550399	551422
ChrI	567740	568578
ChrI	582703	584321
ChrI	621726	622330
ChrI	665284	668182
ChrI	672387	673967
ChrI	698148	698925
ChrI	700978	701567
ChrI	707890	712437
ChrI	714381	716707
ChrI	719586	728577
ChrI	735513	736569
ChrI	740431	741533
ChrI	748455	749108
ChrI	750067	751516
ChrI	769591	770890
ChrI	772129	772708
ChrI	778945	779533
ChrI	794963	796323
ChrI	803073	807593
ChrI	855059	855356
ChrI	863173	864797
ChrI	898084	898853
ChrI	900810	901133
ChrI	902621	903170
ChrI	927401	928579
ChrI	994717	995618
ChrI	1006163	1006539
ChrI	1007617	1008783
ChrI	1026588	1028561
ChrI	1035022	1035928
ChrI	1055000	1056137
ChrI	1068934	1069110
ChrI	1109952	1110848
ChrI	1127069	1127591
ChrI	1138906	1140125
ChrI	1160167	1160655
ChrI	1216101	1217078
ChrI	1217968	1219420
ChrI	1303119	1304287
ChrI	1308457	1309534
ChrI	1371920	1372735
ChrI	1377157	1378058
ChrI	1379386	1379597
ChrI	1404645	1405308
ChrI	1444797	1445311
ChrI	1490385	1491848
ChrI	1511728	1512556
ChrI	1521692	1523148
ChrI	1524825	1525236
ChrI	1540294	1542946
ChrI	1572358	1575685
ChrI	1597911	1599392
ChrI	1637541	1637934
ChrI	1640045	1643337
ChrI	1653224	1654034
ChrI	1656982	1657211
ChrI	1661820	1662049
ChrI	1669685	1670547
ChrI	1705082	1705523
ChrI	1708293	1710306
ChrI	1714809	1715805
ChrI	1731244	1732071
ChrI	1744941	1745246
ChrI	1790250	1794643
ChrI	1847230	1848273
ChrI	1855604	1859950
ChrI	1860970	1864824
ChrI	1870952	1871838
ChrI	1880067	1880668
ChrI	1893282	1893658
ChrI	1911147	1912395
ChrI	1931181	1932091
ChrI	1932829	1933012
ChrI	1949302	1951322
ChrI	1953199	1955168
ChrI	2038350	2038690
ChrI	2039609	2043339
ChrI	2068838	2070803
ChrI	2085025	2086333
ChrI	2089534	2090623
ChrI	2092652	2093284
ChrI	2104635	2107069
ChrI	2144243	2145106
ChrI	2145871	2151871
ChrI	2160737	2163311
ChrI	2175859	2181312
ChrI	2187005	2187889
ChrI	2199623	2200363
ChrI	2208333	2209626
ChrI	2254162	2255067
ChrI	2272554	2275825
ChrI	2280632	2282295
ChrI	2283655	2284197
ChrI	2288063	2289466
ChrI	2313740	2314608
ChrI	2392489	2393267
ChrI	2411685	2411887
ChrI	2417985	2418949
ChrI	2436718	2438065
ChrI	2458545	2459766
ChrI	2485159	2488589
ChrI	2493523	2494627
ChrI	2495771	2497388
ChrI	2521539	2523503
ChrI	2525487	2526476
ChrI	2527596	2529797
ChrI	2566552	2567167
ChrI	2573511	2573978
ChrI	2604307	2605150
ChrI	2608458	2609620
ChrI	2610407	2615910
ChrI	2617278	2619681
ChrI	2620404	2623813
ChrI	2624997	2625536
ChrI	2628092	2630140
ChrI	2631265	2632889
ChrI	2636054	2636785
ChrI	2649019	2649698
ChrI	2659850	2660759
ChrI	2689415	2693480
ChrI	2695330	2707281
ChrI	2709021	2710722
ChrI	2711675	2713471
ChrI	2716156	2717833
ChrI	2718584	2720323
ChrI	2738710	2739356
ChrI	2758290	2758686
ChrI	2781863	2783295
ChrI	2788495	2789181
ChrI	2797243	2798517
ChrI	2864064	2865121
ChrI	2875619	2877371
ChrI	2888206	2888460
ChrI	2890667	2891133
ChrI	2897379	2897713
ChrI	2914439	2916909
ChrI	2920092	2921119
ChrI	2930996	2931628
ChrI	2934806	2935846
ChrI	2942685	2944060
ChrI	2987389	2989394
ChrI	2990326	2992800
ChrI	3001504	3008015
ChrI	3020679	3021602
ChrI	3024706	3026686
ChrI	3029472	3033638
ChrI	3034826	3035325
ChrI	3036534	3037256
ChrI	3053024	3054825
ChrI	3055615	3059955
ChrI	3084206	3085290
ChrI	3097355	3097969
ChrI	3129099	3134272
ChrI	3152985	3153217
ChrI	3154030	3159397
ChrI	3161710	3163317
ChrI	3164319	3164892
ChrI	3169592	3171877
ChrI	3172937	3173815
ChrI	3175666	3176214
ChrI	3183383	3184425
ChrI	3194703	3195984
ChrI	3197960	3199948
ChrI	3200849	3201137
ChrI	3203535	3203780
ChrI	3204518	3206484
ChrI	3266649	3267899
ChrI	3268973	3269459
ChrI	3290059	3292561
ChrI	3309821	3311173
ChrI	3337346	3337967
ChrI	3340891	3342073
ChrI	3354680	3355824
ChrI	3372331	3374027
ChrI	3401054	3404115
ChrI	3405524	3407888
ChrI	3412106	3413032
ChrI	3533911	3535153
ChrI	3594398	3594648
ChrI	3602710	3606216
ChrI	3622616	3623976
ChrI	3624914	3628934
ChrI	3633467	3635133
ChrI	3642807	3643778
ChrI	3650316	3650714
ChrI	3680905	3681654
ChrI	3684589	3686082
ChrI	3715447	3715909
ChrI	3726579	3727428
ChrI	3733789	3735299
ChrI	3736821	3737284
ChrI	3740368	3743392
ChrI	3752799	3753588
ChrI	3754695	3757091
ChrI	3763232	3767073
ChrI	3797945	3799112
ChrI	3907456	3907983
ChrI	3908944	3909732
ChrI	3921288	3923988
ChrI	3928595	3929294
ChrI	3931550	3931853
ChrI	3933439	3934167
ChrI	3936685	3937595
ChrI	3995695	3996413
ChrI	4061221	4061418
ChrI	4095133	4095950
ChrI	4161786	4162397
ChrI	4176049	4178811
ChrI	4180610	4182640
ChrI	4214058	4215140
ChrI	4226362	4227578
ChrI	4251301	4251584
ChrI	4288483	4289278
ChrI	4311419	4311779
ChrI	4312683	4313512
ChrI	4316827	4319742
ChrI	4321507	4325335
ChrI	4326048	4326830
ChrI	4329151	4330532
ChrI	4332996	4336796
ChrI	4337973	4338394
ChrI	4339336	4341783
ChrI	4342618	4345645
ChrI	4348329	4352225
ChrI	4377846	4379867
ChrI	4381513	4393157
ChrI	4490155	4490356
ChrI	4511545	4511723
ChrI	4514394	4515151
ChrI	4541275	4541530
ChrI	4542267	4544478
ChrI	4551201	4552633
ChrI	4556630	4558904
ChrI	4559763	4563262
ChrI	4568766	4570258
ChrI	4596963	4598083
ChrI	4624637	4626137
ChrI	4628095	4634033
ChrI	4644811	4645255
ChrI	4665195	4670465
ChrI	4674750	4676731
ChrI	4678409	4681500
ChrI	4683848	4685571
ChrI	4694567	4695864
ChrI	4703881	4709916
ChrI	4730103	4730666
ChrI	4733295	4734015
ChrI	4786652	4789490
ChrI	4812767	4814457
ChrI	4833846	4835250
ChrI	4838349	4839175
ChrI	4843614	4844503
ChrI	4876778	4878273
ChrI	4884950	4885692
ChrI	4887087	4887640
ChrI	4889403	4889729
ChrI	4892419	4895980
ChrI	4902808	4903208
ChrI	4915205	4922091
ChrI	4922942	4932382
ChrI	4933297	4936160
ChrI	4943535	4945549
ChrI	4955767	4956013
ChrI	4956892	4965731
ChrI	4991612	4992524
ChrI	5018082	5021356
ChrI	5039196	5041579
ChrI	5051619	5054716
ChrI	5074887	5075526
ChrI	5077047	5077225
ChrI	5079658	5080243
ChrI	5088459	5090662
ChrI	5092007	5097777
ChrI	5106230	5106445
ChrI	5124766	5126223
ChrI	5127017	5128683
ChrI	5130415	5132023
ChrI	5132856	5133218
ChrI	5134351	5136871
ChrI	5139950	5141136
ChrI	5152161	5155055
ChrI	5193966	5194645
ChrI	5221733	5222932
ChrI	5224236	5224598
ChrI	5225873	5229520
ChrI	5253563	5253982
ChrI	5275840	5276760
ChrI	5279323	5280174
ChrI	5286730	5286958
ChrI	5288685	5290653
ChrI	5304849	5305147
ChrI	5315866	5317760
ChrI	5319508	5320061
ChrI	5321405	5325018
ChrI	5338507	5340719
ChrI	5367669	5367900
ChrI	5406019	5407680
ChrI	5431003	5431902
ChrI	5433946	5434378
ChrI	5476925	5478901
ChrI	5479936	5481515
ChrI	5485479	5486555
ChrI	5488060	5488957
ChrI	5511265	5513036
ChrI	5535950	5540494
ChrI	5541458	5541658
ChrI	5542775	5546190
ChrI	5576613	5577083
ChrI	5585917	5590909
ChrI	5597396	5598279
ChrI	5621582	5622185
ChrI	5630591	5631644
ChrI	5634887	5635282
ChrI	5642107	5642877
ChrI	5646831	5650218
ChrI	5692309	5694045
ChrI	5698828	5699061
ChrI	5703290	5704182
ChrI	5741592	5742720
ChrI	5744444	5749634
ChrI	5751721	5752602
ChrI	5762515	5762861
ChrI	5770909	5771557
ChrI	5773859	5774470
ChrI	5775779	5776053
ChrI	5777083	5777925
ChrI	5786892	5790104
ChrI	5794247	5794625
ChrI	5820738	5821395
ChrI	5822597	5822817
ChrI	5888065	5888305
ChrI	5891733	5894286
ChrI	5895617	5899520
ChrI	5903001	5903533
ChrI	5924469	5924884
ChrI	5927406	5927818
ChrI	5935373	5935868
ChrI	5947966	5949338
ChrI	5950578	5952297
ChrI	5963592	5966366
ChrI	5986374	5986638
ChrI	5993365	5994780
ChrI	5996259	5997451
ChrI	6001272	6003431
ChrI	6031666	6033719
ChrI	6038633	6039616
ChrI	6041621	6045529
ChrI	6046357	6048166
ChrI	6050442	6051123
ChrI	6054110	6054831
ChrI	6062459	6064731
ChrI	6069671	6070992
ChrI	6075432	6077286
ChrI	6084661	6085291
ChrI	6098250	6098870
ChrI	6100142	6100544
ChrI	6105519	6105837
ChrI	6157051	6157661
ChrI	6162305	6162827
ChrI	6216554	6217624
ChrI	6218809	6223435
ChrI	6224308	6225931
ChrI	6226814	6227424
ChrI	6229639	6236697
ChrI	6237546	6237826
ChrI	6238970	6241001
ChrI	6243539	6244079
ChrI	6248881	6249265
ChrI	6260676	6261651
ChrI	6263564	6264282
ChrI	6268646	6269108
ChrI	6271051	6271915
ChrI	6290834	6291749
ChrI	6292916	6297208
ChrI	6298293	6298926
ChrI	6314177	6315914
ChrI	6323181	6330683
ChrI	6332471	6334258
ChrI	6336078	6336359
ChrI	6349369	6351288
ChrI	6352288	6356970
ChrI	6358240	6359819
ChrI	6368982	6370953
ChrI	6376606	6376880
ChrI	6391191	6393493
ChrI	6394203	6405121
ChrI	6414757	6415615
ChrI	6418537	6420128
ChrI	6428904	6429427
ChrI	6430144	6431448
ChrI	6438277	6444197
ChrI	6447091	6450596
ChrI	6457693	6460275
ChrI	6536685	6537877
ChrI	6538599	6539001
ChrI	6542822	6543095
ChrI	6576066	6588797
ChrI	6591943	6593632
ChrI	6651869	6654792
ChrI	6713724	6714324
ChrI	6715095	6717005
ChrI	6748468	6749542
ChrI	6752553	6753196
ChrI	6758427	6759072
ChrI	6763634	6770666
ChrI	6771378	6771780
ChrI	6777392	6778039
ChrI	6780837	6781973
ChrI	6784405	6786241
ChrI	6793212	6796390
ChrI	6838738	6841196
ChrI	6857335	6857767
ChrI	6860922	6861416
ChrI	6867468	6867788
ChrI	6873653	6874547
ChrI	6881146	6881424
ChrI	6882149	6885910
ChrI	6904070	6905271
ChrI	6910207	6910865
ChrI	6922837	6925491
ChrI	6932374	6933766
ChrI	6951994	6952460
ChrI	6956718	6957578
ChrI	6958512	6959147
ChrI	6969201	6970650
ChrI	6972131	6973565
ChrI	6987302	6988560
ChrI	7028867	7029248
ChrI	7047702	7048232
ChrI	7119482	7126501
ChrI	7129722	7133763
ChrI	7142730	7147625
ChrI	7151097	7152565
ChrI	7160604	7165086
ChrI	7176810	7181476
ChrI	7193406	7194972
ChrI	7197847	7198608
ChrI	7202425	7202688
ChrI	7204049	7204580
ChrI	7213957	7214984
ChrI	7218360	7220037
ChrI	7227076	7228294
ChrI	7231958	7234260
ChrI	7235333	7236997
ChrI	7243151	7247848
ChrI	7248941	7250828
ChrI	7252429	7254374
ChrI	7260507	7262311
ChrI	7265069	7266674
ChrI	7278389	7279970
ChrI	7286985	7290582
ChrI	7291832	7297852
ChrI	7317867	7322138
ChrI	7355840	7357099
ChrI	7372055	7374130
ChrI	7374978	7376585
ChrI	7397480	7398853
ChrI	7399794	7401056
ChrI	7408314	7409070
ChrI	7419473	7421554
ChrI	7422394	7422576
ChrI	7429446	7430205
ChrI	7449644	7453726
ChrI	7512304	7512937
ChrI	7523326	7524371
ChrI	7525389	7528491
ChrI	7533805	7545005
ChrI	7547803	7548328
ChrI	7556316	7560499
ChrI	7566701	7568689
ChrI	7574674	7578940
ChrI	7580230	7581899
ChrI	7583238	7584214
ChrI	7585247	7589046
ChrI	7592941	7596788
ChrI	7601521	7603098
ChrI	7607671	7609405
ChrI	7610816	7617078
ChrI	7618634	7619672
ChrI	7630801	7632143
ChrI	7713320	7713809
ChrI	7728771	7733517
ChrI	7743163	7743757
ChrI	7753573	7754262
ChrI	7764339	7768042
ChrI	7769903	7771644
ChrI	7775901	7777305
ChrI	7784189	7784471
ChrI	7790974	7791322
ChrI	7804966	7806520
ChrI	7810211	7810840
ChrI	7812016	7813092
ChrI	7816586	7822355
ChrI	7825054	7825533
ChrI	7826359	7827767
ChrI	7832565	7836640
ChrI	7849935	7857883
ChrI	7858638	7860963
ChrI	7873758	7875872
ChrI	7882842	7884137
ChrI	7892746	7893139
ChrI	7907996	7910045
ChrI	7949855	7953548
ChrI	7972465	7974985
ChrI	7979446	7980000
ChrI	7985395	7989633
ChrI	8013996	8017795
ChrI	8032674	8041882
ChrI	8067474	8069542
ChrI	8074210	8082550
ChrI	8084080	8094015
ChrI	8096458	8102158
ChrI	8110421	8112940
ChrI	8113823	8115547
ChrI	8116608	8117436
ChrI	8118605	8121359
ChrI	8122801	8123805
ChrI	8124660	8128144
ChrI	8131796	8132734
ChrI	8136003	8136512
ChrI	8137403	8138996
ChrI	8140342	8141831
ChrI	8145673	8149427
ChrI	8154205	8161475
ChrI	8164000	8165188
ChrI	8167009	8167405
ChrI	8168402	8170346
ChrI	8173650	8175290
ChrI	8179381	8179601
ChrI	8180716	8180896
ChrI	8182185	8183080
ChrI	8187009	8195557
ChrI	8196626	8199479
ChrI	8206606	8207487
ChrI	8208986	8209752
ChrI	8212097	8216771
ChrI	8219721	8220721
ChrI	8226014	8228223
ChrI	8260482	8263184
ChrI	8274655	8282098
ChrI	8285065	8287527
ChrI	8300545	8301797
ChrI	8304923	8305897
ChrI	8309725	8318369
ChrI	8320483	8323569
ChrI	8325303	8326658
ChrI	8336463	8339662
ChrI	8340441	8342099
ChrI	8343449	8345079
ChrI	8349794	8350359
ChrI	8365593	8366042
ChrI	8647208	8647589
ChrI	8664628	8665575
ChrI	8668114	8669386
ChrI	8700786	8702477
ChrI	8708838	8709539
ChrI	8711757	8714073
ChrI	8717691	8718792
ChrI	8723774	8724654
ChrI	8730833	8731130
ChrI	8732696	8733297
ChrI	8749353	8751678
ChrI	8752391	8753151
ChrI	8765237	8765785
ChrI	8768016	8770107
ChrI	8784139	8785693
ChrI	8808047	8809291
ChrI	8814174	8814792
ChrI	8820316	8823362
ChrI	8828513	8830474
ChrI	8839251	8842411
ChrI	8843135	8846121
ChrI	8853348	8857203
ChrI	8862416	8864938
ChrI	8865656	8867038
ChrI	8867803	8868996
ChrI	8870522	8880384
ChrI	8881450	8886922
ChrI	8888293	8894510
ChrI	8901003	8902318
ChrI	8907669	8908352
ChrI	8913883	8914394
ChrI	8922887	8923596
ChrI	8944089	8947810
ChrI	8953586	8957251
ChrI	8957972	8959146
ChrI	8967040	8968016
ChrI	8968852	8969878
ChrI	8974430	8978891
ChrI	8980637	8982373
ChrI	8983103	8989234
ChrI	8992492	8993182
ChrI	8994220	8995456
ChrI	9005735	9005940
ChrI	9006943	9008271
ChrI	9009480	9010054
ChrI	9010797	9011375
ChrI	9040934	9045137
ChrI	9072905	9073674
ChrI	9074553	9075823
ChrI	9104737	9112792
ChrI	9117566	9130490
ChrI	9133294	9137579
ChrI	9138386	9139897
ChrI	9141156	9143558
ChrI	9148295	9149253
ChrI	9150622	9151709
ChrI	9152812	9156416
ChrI	9157161	9157504
ChrI	9168600	9169620
ChrI	9170416	9171575
ChrI	9178774	9182084
ChrI	9198161	9201181
ChrI	9213328	9216064
ChrI	9227364	9228841
ChrI	9238433	9243628
ChrI	9253619	9254310
ChrI	9265056	9270469
ChrI	9271753	9274050
ChrI	9276374	9281998
ChrI	9284425	9290071
ChrI	9291013	9299507
ChrI	9302118	9303435
ChrI	9307007	9309103
ChrI	9316120	9317007
ChrI	9333534	9333753
ChrI	9336855	9338191
ChrI	9339449	9339794
ChrI	9341455	9343622
ChrI	9358329	9364919
ChrI	9366291	9373942
ChrI	9377632	9378803
ChrI	9387593	9388832
ChrI	9420911	9422015
ChrI	9424850	9426836
ChrI	9433651	9434932
ChrI	9436692	9437976
ChrI	9441000	9441583
ChrI	9442417	9451006
ChrI	9474787	9476737
ChrI	9477932	9481911
ChrI	9486041	9497218
ChrI	9501233	9501830
ChrI	9503136	9503769
ChrI	9509857	9511869
ChrI	9512921	9513333
ChrI	9515613	9521382
ChrI	9538376	9542382
ChrI	9543138	9548149
ChrI	9555490	9556113
ChrI	9556923	9563652
ChrI	9565128	9567385
ChrI	9571316	9572556
ChrI	9575752	9577584
ChrI	9578436	9578887
ChrI	9586493	9587846
ChrI	9596608	9596972
ChrI	9599217	9602207
ChrI	9604543	9605227
ChrI	9621828	9625019
ChrI	9668971	9670853
ChrI	9678193	9682017
ChrI	9683783	9685011
ChrI	9688098	9689348
ChrI	9693628	9700806
ChrI	9708581	9710889
ChrI	9712971	9714095
ChrI	9715494	9720178
ChrI	9723611	9724762
ChrI	9726545	9730136
ChrI	9731248	9735959
ChrI	9736731	9746000
ChrI	9746810	9746992
ChrI	9747853	9748718
ChrI	9749860	9762115
ChrI	9762869	9764485
ChrI	9765679	9769902
ChrI	9771829	9773427
ChrI	9780890	9781567
ChrI	9784330	9786604
ChrI	9788703	9790295
ChrI	9791484	9791880
ChrI	9792644	9795391
ChrI	9802065	9807295
ChrI	9808176	9810809
ChrI	9811595	9812091
ChrI	9812906	9814889
ChrI	9817660	9824741
ChrI	9825654	9827389
ChrI	9831067	9837196
ChrI	9845133	9845859
ChrI	9848138	9852139
ChrI	9853014	9859527
ChrI	9860637	9861664
ChrI	9868337	9870858
ChrI	9873954	9874156
ChrI	9878946	9890060
ChrI	9891050	9891288
ChrI	9892052	9896824
ChrI	9908355	9909176
ChrI	9918976	9921028
ChrI	9922135	9922871
ChrI	9925676	9929139
ChrI	9933053	9934460
ChrI	9935849	9936428
ChrI	9938770	9939525
ChrI	9943126	9944567
ChrI	9946621	9947859
ChrI	9949224	9950784
ChrI	9960375	9965479
ChrI	9968081	9971433
ChrI	9981192	9983223
ChrI	9987519	9993785
ChrI	9997599	9998405
ChrI	10000198	10016379
ChrI	10019436	10020342
ChrI	10025874	10027899
ChrI	10031028	10033934
ChrI	10035018	10036268
ChrI	10037866	10038347
ChrI	10040178	10041157
ChrI	10042320	10055942
ChrI	10056647	10057083
ChrI	10060695	10064285
ChrI	10067810	10071635
ChrI	10072417	10081023
ChrI	10089308	10091898
ChrI	10093595	10096628
ChrI	10101075	10101519
ChrI	10108454	10108846
ChrI	10121438	10124320
ChrI	10129003	10129671
ChrI	10135980	10138411
ChrI	10152781	10153382
ChrI	10155928	10162339
ChrI	10163506	10164574
ChrI	10166078	10179093
ChrI	10179821	10181002
ChrI	10183288	10183762
ChrI	10185429	10187170
ChrI	10191781	10194046
ChrI	10194830	10199915
ChrI	10200921	10205203
ChrI	10227565	10228201
ChrI	10229192	10232294
ChrI	10233193	10233492
ChrI	10249232	10250528
ChrI	10296594	10298277
ChrI	10301137	10304195
ChrI	10310628	10320924
ChrI	10342063	10342882
ChrI	10347724	10351648
ChrI	10357739	10360689
ChrI	10363802	10364006
ChrI	10366598	10372417
ChrI	10375470	10376738
ChrI	10385009	10389353
ChrI	10390169	10390671
ChrI	10394488	10397114
ChrI	10399611	10409512
ChrI	10416456	10418684
ChrI	10422516	10425389
ChrI	10429478	10430911
ChrI	10440399	10442235
ChrI	10443151	10448645
ChrI	10449573	10451091
ChrI	10452120	10452740
ChrI	10453921	10461449
ChrI	10465281	10475230
ChrI	10483534	10484533
ChrI	10487086	10488138
ChrI	10489793	10491378
ChrI	10492665	10500678
ChrI	10502249	10506007
ChrI	10507965	10522222
ChrI	10523294	10525302
ChrI	10566639	10568159
ChrI	10569242	10582716
ChrI	10587043	10587863
ChrI	10591245	10595624
ChrI	10605090	10608702
ChrI	10613170	10618180
ChrI	10619535	10620192
ChrI	10622891	10624711
ChrI	10627937	10630937
ChrI	10640476	10642421
ChrI	10643528	10644263
ChrI	10648932	10652655
ChrI	10653967	10654151
ChrI	10656187	10666342
ChrI	10668435	10671021
ChrI	10671840	10674902
ChrI	10679917	10680384
ChrI	10685322	10685611
ChrI	10686855	10694499
ChrI	10695300	10697270
ChrI	10698539	10698864
ChrI	10699599	10701200
ChrI	10703824	10707241
ChrI	10708013	10709900
ChrI	10711582	10716016
ChrI	10717371	10718574
ChrI	10719351	10722051
ChrI	10727295	10727726
ChrI	10731413	10732129
ChrI	10732959	10733158
ChrI	10735496	10742759
ChrI	10745513	10745863
ChrI	10749410	10752067
ChrI	10753172	10754273
ChrI	10755529	10756073
ChrI	10763945	10772832
ChrI	10774657	10777761
ChrI	10783421	10785160
ChrI	10789814	10798584
ChrI	10799447	10804287
ChrI	10805042	10805846
ChrI	10806564	10808081
ChrI	10808916	10809125
ChrI	10809853	10811971
ChrI	10863204	10865597
ChrI	10870212	10873445
ChrI	10875835	10877609
ChrI	10878570	10879321
ChrI	10882441	10883724
ChrI	10885423	10885889
ChrI	10886640	10886885
ChrI	10887673	10891946
ChrI	10901404	10901775
ChrI	10902801	10906629
ChrI	10952808	10954060
ChrI	10955237	10957522
ChrI	10958716	10961981
ChrI	10963716	10967918
ChrI	10968697	10969634
ChrI	10973482	10979643
ChrI	10987965	10990537
ChrI	10992037	11005389
ChrI	11006406	11006991
ChrI	11007760	11008055
ChrI	11009378	11010530
ChrI	11013247	11016320
ChrI	11021146	11021778
ChrI	11026792	11027259
ChrI	11031537	11032259
ChrI	11035790	11036679
ChrI	11037739	11043737
ChrI	11044826	11045928
ChrI	11048121	11051962
ChrI	11052960	11053257
ChrI	11056556	11057918
ChrI	11059882	11060964
ChrI	11062152	11064731
ChrI	11066520	11066719
ChrI	11068266	11071333
ChrI	11072278	11074625
ChrI	11076000	11082508
ChrI	11084592	11093300
ChrI	11103612	11105323
ChrI	11107891	11123486
ChrI	11124491	11131195
ChrI	11132057	11138496
ChrI	11139213	11142327
ChrI	11143525	11144046
ChrI	11147533	11148467
ChrI	11149832	11150353
ChrI	11152073	11154090
ChrI	11159684	11161240
ChrI	11162684	11165785
ChrI	11166773	11167920
ChrI	11170103	11171430
ChrI	11180898	11181160
ChrI	11193019	11194040
ChrI	11201948	11208083
ChrI	11230694	11231911
ChrI	11240322	11240728
ChrI	11244480	11246401
ChrI	11248882	11249608
ChrI	11250511	11252568
ChrI	11258222	11262135
ChrI	11273166	11280278
ChrI	11282298	11284291
ChrI	11287746	11294066
ChrI	11294809	11296054
ChrI	11296811	11298691
ChrI	11299398	11318875
ChrI	11321451	11322106
ChrI	11330644	11347642
ChrI	11354098	11354839
ChrI	11355638	11361535
ChrI	11362669	11363032
ChrI	11363892	11364083
ChrI	11365184	11366514
ChrI	11370833	11375630
ChrI	11383695	11384864
ChrI	11387478	11401658
ChrI	11402525	11403037
ChrI	11404852	11406637
ChrI	11407735	11409746
ChrI	11410557	11411772
ChrI	11412678	11416522
ChrI	11417687	11418374
ChrI	11419211	11421726
ChrI	11422518	11424161
ChrI	11425289	11425709
ChrI	11427004	11432577
ChrI	11436906	11438769
ChrI	11440881	11447141
ChrI	11449514	11453538
ChrI	11454292	11454559
ChrI	11465318	11466183
ChrI	11474423	11475849
ChrI	11476662	11490979
ChrI	11495159	11499499
ChrI	11500487	11500793
ChrI	11507102	11507675
ChrI	11514054	11519367
ChrI	11521253	11523464
ChrI	11525827	11529693
ChrI	11531649	11532404
ChrI	11536940	11541035
ChrI	11547344	11550590
ChrI	11558026	11561557
ChrI	11562307	11565773
ChrI	11566564	11567493
ChrI	11568398	11571244
ChrI	11572034	11575087
ChrI	11575952	11584411
ChrI	11585295	11589904
ChrI	11601486	11602449
ChrI	11603349	11604726
ChrI	11608133	11609409
ChrI	11618230	11620017
ChrI	11620796	11626249
ChrI	11627480	11629161
ChrI	11661585	11663847
ChrI	11669627	11669962
ChrI	11695085	11699735
ChrI	11726801	11728430
ChrI	11735899	11739632
ChrI	11746775	11748892
ChrI	11752068	11753629
ChrI	11755656	11757927
ChrI	11766800	11767314
ChrI	11769362	11777595
ChrI	11783758	11784022
ChrI	11791228	11791772
ChrI	11798169	11803851
ChrI	11807253	11810240
ChrI	11811466	11813705
ChrI	11814997	11816716
ChrI	11818292	11821008
ChrI	11821737	11829140
ChrI	11831801	11832904
ChrI	11860645	11861248
ChrI	11868294	11869117
ChrI	11876565	11878356
ChrI	11898655	11900537
ChrI	11904142	11905794
ChrI	11906905	11909393
ChrI	11919557	11920019
ChrI	11922214	11924569
ChrI	11930167	11933365
ChrI	11937766	11942799
ChrI	11961641	11962025
ChrI	11964034	11964951
ChrI	11978055	11980195
ChrI	11981176	12001969
ChrI	12006696	12011680
ChrI	12024441	12025151
ChrI	12028591	12030614
ChrI	12035050	12037202
ChrI	12039535	12041150
ChrI	12049845	12050788
ChrI	12051614	12054912
ChrI	12064485	12071847
ChrI	12072808	12076188
ChrI	12077299	12079019
ChrI	12085274	12085905
ChrI	12087029	12088996
ChrI	12090374	12099298
ChrI	12113650	12114440
ChrI	12116202	12117887
ChrI	12122007	12122726
ChrI	12124755	12128918
ChrI	12132283	12134901
ChrI	12141083	12143159
ChrI	12144643	12145150
ChrI	12150016	12150396
ChrI	12151458	12153308
ChrI	12156320	12156639
ChrI	12158028	12160424
ChrI	12162311	12167124
ChrI	12168278	12179545
ChrI	12180862	12191331
ChrI	12192987	12193617
ChrI	12196202	12209557
ChrI	12211193	12216860
ChrI	12217640	12217865
ChrI	12219393	12222585
ChrI	12223503	12225253
ChrI	12226224	12228325
ChrI	12229201	12229484
ChrI	12232208	12234108
ChrI	12236092	12236949
ChrI	12237739	12240287
ChrI	12258050	12258289
ChrI	12260944	12262251
ChrI	12262981	12263265
ChrI	12265721	12268225
ChrI	12274445	12275415
ChrI	12280762	12287773
ChrI	12288596	12295257
ChrI	12296652	12298718
ChrI	12299678	12300117
ChrI	12307232	12320172
ChrI	12321443	12326167
ChrI	12346532	12351820
ChrI	12357785	12363726
ChrI	12367215	12368233
ChrI	12369329	12369803
ChrI	12379972	12380644
ChrI	12382050	12383044
ChrI	12385154	12386731
ChrI	12402673	12403077
ChrI	12406377	12411392
ChrI	12412227	12413370
ChrI	12414983	12438180
ChrI	12439336	12439958
ChrI	12468604	12472057
ChrI	12476229	12482631
ChrI	12483353	12485747
ChrI	12486821	12487673
ChrI	12492405	12495921
ChrI	12500670	12503320
ChrI	12505085	12505623
ChrI	12510638	12511596
ChrI	12513558	12514284
ChrI	12516376	12520680
ChrI	12528430	12528871
ChrI	12533300	12543210
ChrI	12544423	12545808
ChrI	12546536	12558370
ChrI	12559905	12561074
ChrI	12562103	12564342
ChrI	12565286	12565642
ChrI	12567681	12569360
ChrI	12570634	12573394
ChrI	12575877	12576671
ChrI	12577824	12579436
ChrI	12592606	12604038
ChrI	12604779	12623942
ChrI	12624981	12629089
ChrI	12630443	12632968
ChrI	12637232	12638023
ChrI	12640824	12641118
ChrI	12642054	12643624
ChrI	12648318	12649746
ChrI	12652364	12657639
ChrI	12658947	12677111
ChrI	12677845	12681046
ChrI	12688116	12695225
ChrI	12698023	12698329
ChrI	12699788	12712651
ChrI	12714952	12716086
ChrI	12718539	12719530
ChrI	12731166	12732719
ChrI	12736362	12737944
ChrI	12738981	12739820
ChrI	12744140	12744328
ChrI	12746106	12747990
ChrI	12749225	12749659
ChrI	12750695	12750956
ChrI	12751988	12759862
ChrI	12761669	12763214
ChrI	12765200	12768101
ChrI	12769123	12777628
ChrI	12780660	12782336
ChrI	12783189	12784700
ChrI	12787686	12789150
ChrI	12789887	12791120
ChrI	12795882	12796760
ChrI	12803758	12818236
ChrI	12822793	12825165
ChrI	12828625	12831357
ChrI	12836620	12838345
ChrI	12839235	12840172
ChrI	12842259	12848781
ChrI	12852555	12856282
ChrI	12857139	12857440
ChrI	12858907	12870247
ChrI	12871716	12871990
ChrI	12874181	12882042
ChrI	12898978	12901410
ChrI	12902248	12903517
ChrI	12906085	12906530
ChrI	12921657	12922377
ChrI	12926481	12931347
ChrI	12935971	12941786
ChrI	12942542	12945222
ChrI	12947848	12948185
ChrI	12953055	12956005
ChrI	12956875	12957713
ChrI	12961709	12963759
ChrI	12964672	12968284
ChrI	12969174	12973132
ChrI	12974882	12977369
ChrI	12979284	12983590
ChrI	12985940	13007380
ChrI	13008858	13019003
ChrI	13024098	13024385
ChrI	13047415	13048479
ChrI	13050347	13061244
ChrI	13067243	13068155
ChrI	13069016	13071870
ChrI	13074485	13074869
ChrI	13076783	13080003
ChrI	13080801	13083275
ChrI	13085758	13093927
ChrI	13094872	13110653
ChrI	13112988	13114932
ChrI	13115735	13119324
ChrI	13120159	13122267
ChrI	13124447	13124683
ChrI	13128429	13130340
ChrI	13142583	13144517
ChrI	13148849	13149790
ChrI	13154220	13158640
ChrI	13160835	13162755
ChrI	13164441	13168119
ChrI	13179086	13180902
ChrI	13183046	13184687
ChrI	13185484	13194947
ChrI	13198785	13199389
ChrI	13201492	13208918
ChrI	13212605	13216835
ChrI	13222355	13225855
ChrI	13231236	13232655
ChrI	13234812	13239848
ChrI	13243375	13245161
ChrI	13248547	13250502
ChrI	13254349	13256275
ChrI	13261485	13262080
ChrI	13279512	13288235
ChrI	13288957	13294290
ChrI	13296359	13306693
ChrI	13307840	13310887
ChrI	13311618	13325462
ChrI	13333096	13339080
ChrI	13340022	13340245
ChrI	13342252	13342687
ChrI	13343659	13343963
ChrI	13344779	13351206
ChrI	13355660	13357986
ChrI	13359110	13363608
ChrI	13364708	13366776
ChrI	13368980	13378946
ChrI	13381964	13388098
ChrI	13389679	13396191
ChrI	13396907	13398747
ChrI	13401175	13407140
ChrI	13409176	13414556
ChrI	13417273	13421659
ChrI	13423431	13426570
ChrI	13433052	13440077
ChrI	13459950	13461767
ChrI	13463737	13465489
ChrI	13466454	13472414
ChrI	13473451	13475358
ChrI	13477645	13478917
ChrI	13481352	13481617
ChrI	13487541	13488533
ChrI	13497668	13498734
ChrI	13499997	13504073
ChrI	13508599	13510878
ChrI	13515562	13519918
ChrI	13570976	13571441
ChrI	13572591	13573088
ChrI	13573796	13575937
ChrI	13586037	13586359
ChrI	13589353	13590103
ChrI	13592566	13599854
ChrI	13610905	13611931
ChrI	13618633	13620110
ChrI	13644551	13647506
ChrI	13649879	13650364
ChrI	13660257	13661777
ChrI	13704588	13705668
ChrI	13707535	13711526
ChrI	13712278	13712706
ChrI	13723426	13724914
ChrI	13728044	13729014
ChrI	13746519	13748122
ChrI	13751544	13752722
ChrI	13776620	13777428
ChrI	13789361	13790413
ChrI	13817957	13818368
ChrI	13836679	13840960
ChrI	13842727	13846131
ChrI	13854370	13855468
ChrI	13857327	13858100
ChrI	13918183	13918466
ChrI	13919216	13920039
ChrI	13929066	13930895
ChrI	13959140	13960433
ChrI	13963820	13965888
ChrI	13981112	13981975
ChrI	13984701	13985225
ChrI	14011034	14013084
ChrI	14038170	14040335
ChrI	14048645	14050149
ChrI	14056268	14057694
ChrI	14092466	14092853
ChrI	14128817	14130505
ChrI	14136900	14137342
ChrI	14139339	14139804
ChrI	14174765	14177863
ChrI	14178816	14180358
ChrI	14181200	14182952
ChrI	14190841	14192060
ChrI	14235851	14236361
ChrI	14238004	14238697
ChrI	14248110	14248653
ChrI	14250940	14251389
ChrI	14264644	14265328
ChrI	14269918	14272152
ChrI	14291300	14294170
ChrI	14298818	14299307
ChrI	14319067	14320617
ChrI	14334785	14335167
ChrI	14370317	14379464
ChrI	14380176	14380691
ChrI	14381452	14381729
ChrI	14382557	14383049
ChrI	14387954	14388265
ChrI	14397205	14398224
ChrI	14417169	14419250
ChrI	14421034	14428568
ChrI	14439269	14440650
ChrI	14445805	14447032
ChrI	14448197	14449877
ChrI	14472411	14473094
ChrI	14486820	14492932
ChrI	14493701	14494141
ChrI	14495354	14496972
ChrI	14512292	14515642
ChrI	14518674	14520118
ChrI	14526034	14530480
ChrI	14533162	14533667
ChrI	14534411	14540552
ChrI	14563545	14564759
ChrI	14569454	14576574
ChrI	14603298	14609273
ChrI	14619616	14619870
ChrI	14638674	14640166
ChrI	14663379	14664200
ChrI	14670973	14674139
ChrI	14711688	14712062
ChrI	14725644	14725949
ChrI	14727284	14727699
ChrI	14729373	14732049
ChrI	14735247	14737516
ChrI	14742931	14743821
ChrI	14754292	14754612
ChrI	14755548	14758924
ChrI	14768513	14770894
ChrI	14777408	14779159
ChrI	14780109	14780444
ChrI	14797120	14798041
ChrI	14799421	14803706
ChrI	14804753	14806691
ChrI	14809466	14810414
ChrI	14811652	14811904
ChrI	14828576	14830599
ChrI	14838523	14840094
ChrI	14842267	14843529
ChrI	14846409	14846943
ChrI	14847979	14848553
ChrI	14854573	14854816
ChrI	14858258	14858775
ChrI	14869076	14869587
ChrI	14890418	14892446
ChrI	14893791	14898998
ChrI	14901413	14911299
ChrI	14925148	14934110
ChrI	14935106	14937233
ChrI	14943024	14945690
ChrI	14947204	14948502
ChrI	14953192	14956718
ChrI	14957430	14959664
ChrI	14960546	14961543
ChrI	14975408	14976905
ChrI	14978448	14978825
ChrI	14986469	14991899
ChrI	14993937	14994566
ChrI	14998316	14998864
ChrI	15001057	15002488
ChrI	15041747	15042239
ChrI	15043121	15043441
ChrI	15044486	15044749
ChrI	15045522	15047873
ChrI	15048591	15050061
ChrI	15051241	15053176
ChrI	15055101	15055902
ChrI	15066725	15070300
ChrI	15071179	15074761
ChrI	15076234	15079742
ChrI	15081690	15083710
ChrI	15090271	15095041
ChrI	15100977	15102823
ChrI	15107340	15108501
ChrI	15109250	15110629
ChrI	15111616	15111826
ChrI	15113075	15113507
ChrI	15115726	15116097
ChrI	15116938	15118108
ChrI	15125161	15130265
ChrI	15139055	15142831
ChrI	15162151	15163582
ChrI	15167717	15168249
ChrI	15169821	15170903
ChrI	15177132	15177389
ChrI	15183115	15183823
ChrI	15185218	15186701
ChrI	15198353	15199805
ChrI	15204173	15204966
ChrI	15206343	15207099
ChrI	15208762	15209981
ChrI	15217900	15223586
ChrI	15237474	15243062
ChrI	15244826	15249370
ChrI	15255011	15257116
ChrI	15263878	15265429
ChrI	15267714	15269860
ChrI	15274960	15275922
ChrI	15279206	15281916
ChrI	15283206	15285985
ChrI	15292883	15294291
ChrI	15305688	15307079
ChrI	15347655	15349026
ChrI	15351590	15356521
ChrI	15360156	15360796
ChrI	15362188	15362544
ChrI	15363697	15377498
ChrI	15380768	15381755
ChrI	15393317	15394374
ChrI	15395143	15396494
ChrI	15397335	15397846
ChrI	15408780	15410809
ChrI	15412941	15414265
ChrI	15507860	15509546
ChrI	15513978	15515122
ChrI	15558177	15561129
ChrI	15601376	15602075
ChrI	15603335	15605324
ChrI	15618314	15618572
ChrI	15675313	15676408
ChrI	15677799	15679203
ChrI	15681047	15694807
ChrI	15696073	15700316
ChrI	15703690	15704532
ChrI	15708976	15709264
ChrI	15711553	15713757
ChrI	15720336	15721128
ChrI	15956932	15957271
ChrI	16080066	16080583
ChrI	16092504	16092890
ChrI	16112399	16112693
ChrI	16130749	16131612
ChrI	16159903	16161050
ChrI	16193481	16194073
ChrI	16208323	16209041
ChrI	16225460	16226231
ChrI	16259316	16261151
ChrI	16271993	16273474
ChrI	16284847	16287658
ChrI	16301628	16303003
ChrI	16304044	16314340
ChrI	16315842	16316123
ChrI	16324666	16326492
ChrI	16338129	16342659
ChrI	16362829	16363092
ChrI	16369707	16370200
ChrI	16372386	16372633
ChrI	16381636	16382797
ChrI	16383918	16387279
ChrI	16388329	16391330
ChrI	16392122	16392882
ChrI	16408454	16409435
ChrI	16410176	16416910
ChrI	16417626	16419399
ChrI	16420640	16422839
ChrI	16425377	16429036
ChrI	16434884	16443682
ChrI	16493489	16494502
ChrI	16498083	16499203
ChrI	16504778	16507945
ChrI	16708472	16709417
ChrI	16734666	16737490
ChrI	16780000	16781223
ChrI	16793702	16798120
ChrI	16802228	16802569
ChrI	16803278	16803928
ChrI	16807495	16809019
ChrI	16809794	16817253
ChrI	16818233	16842293
ChrI	16843011	16844990
ChrI	16848650	16849348
ChrI	16853359	16854853
ChrI	16868130	16869461
ChrI	16871150	16875390
ChrI	16876151	16876792
ChrI	16902547	16903848
ChrI	16904773	16907546
ChrI	16910175	16911584
ChrI	16919295	16919556
ChrI	16920778	16922938
ChrI	16923656	16925461
ChrI	16928425	16933445
ChrI	16937198	16937461
ChrI	16948920	16950221
ChrI	16958751	16959288
ChrI	16963127	16964799
ChrI	16966239	16966840
ChrI	16986964	16989215
ChrI	17003380	17004930
ChrI	17137753	17138140
ChrI	17148564	17149218
ChrI	17161088	17163185
ChrI	17164331	17164678
ChrI	17165384	17172186
ChrI	17198219	17199268
ChrI	17208336	17209206
ChrI	17212507	17213373
ChrI	17245717	17246409
ChrI	17248413	17251082
ChrI	17273681	17274906
ChrI	17299171	17300406
ChrI	17304970	17305399
ChrI	17339062	17339522
ChrI	17351252	17352121
ChrI	17353811	17356122
ChrI	17366317	17367667
ChrI	17382977	17383643
ChrI	17415042	17418548
ChrI	17419754	17421672
ChrI	17434539	17435564
ChrI	17454515	17454924
ChrI	17459324	17460144
ChrI	17492250	17494005
ChrI	17496939	17497174
ChrI	17510237	17515260
ChrI	17525313	17527040
ChrI	17536420	17536720
ChrI	17548862	17552275
ChrI	17559772	17563853
ChrI	17564591	17570235
ChrI	17572138	17573444
ChrI	17582156	17584380
ChrI	17586647	17589728
ChrI	17604415	17608870
ChrI	17628973	17632873
ChrI	17634152	17634389
ChrI	17636208	17649573
ChrI	17671050	17674007
ChrI	17694735	17695014
ChrI	17763676	17764113
ChrI	17777808	17779047
ChrI	17783055	17785480
ChrI	17786361	17788375
ChrI	17814930	17816254
ChrI	17826583	17830764
ChrI	17880821	17881446
ChrI	17886897	17887714
ChrI	17888458	17890834
ChrI	17966010	17966534
ChrI	17967922	17973275
ChrI	17991686	17992909
ChrI	18021180	18022657
ChrI	18057323	18057621
ChrI	18060777	18061660
ChrI	18063473	18064821
ChrI	18073753	18077721
ChrI	18090450	18093890
ChrI	18094631	18095347
ChrI	18097475	18098861
ChrI	18110761	18110956
ChrI	18126099	18127060
ChrI	18135782	18136781
ChrI	18138097	18140034
ChrI	18148408	18149459
ChrI	18155479	18156886
ChrI	18161847	18162979
ChrI	18181420	18182186
ChrI	18192436	18194419
ChrI	18230367	18231529
ChrI	18235958	18243899
ChrI	18296094	18297482
ChrI	18299436	18300195
ChrI	18342069	18346351
ChrI	18368254	18370176
ChrI	18379438	18379801
ChrI	18383718	18385438
ChrI	18386214	18386904
ChrI	18398386	18399943
ChrI	18402010	18403032
ChrI	18437316	18439788
ChrI	18440511	18441565
ChrI	18445489	18446476
ChrI	18448416	18449749
ChrI	18450746	18451253
ChrI	18461472	18464909
ChrI	18470750	18471526
ChrI	18473777	18474510
ChrI	18485963	18487096
ChrI	18487894	18488079
ChrI	18489174	18490238
ChrI	18490990	18496218
ChrI	18497015	18498502
ChrI	18501476	18501823
ChrI	18502575	18503188
ChrI	18505660	18508530
ChrI	18579535	18582537
ChrI	18640318	18646032
ChrI	18647031	18647465
ChrI	18665089	18666933
ChrI	18673691	18675939
ChrI	18685071	18686904
ChrI	18690533	18692116
ChrI	18699426	18703089
ChrI	18704498	18705191
ChrI	18711071	18712515
ChrI	18772638	18773924
ChrI	18782753	18783697
ChrI	18870781	18875222
ChrI	18908245	18913623
ChrI	18928683	18930281
ChrI	18935027	18935785
ChrI	18965118	18966957
ChrI	19024220	19025397
ChrI	19029269	19030129
ChrI	19052609	19052957
ChrI	19070350	19071020
ChrI	19091419	19091703
ChrI	19206327	19208189
ChrI	19248161	19249015
ChrI	19289832	19291692
ChrI	19304406	19304706
ChrI	19330166	19331618
ChrI	19352199	19352714
ChrI	19386123	19386419
ChrI	19387564	19387813
ChrI	19432129	19434485
ChrI	19444772	19445762
ChrI	19466671	19468475
ChrI	19487336	19488531
ChrI	19491566	19492367
ChrI	19499862	19501187
ChrI	19539965	19540222
ChrI	19548413	19548711
ChrI	19551930	19553002
ChrI	19581177	19581577
ChrI	19583593	19586873
ChrI	19588018	19593204
ChrI	19595129	19596182
ChrI	19611836	19612336
ChrI	19618774	19619396
ChrI	19634117	19635453
ChrI	19680107	19680869
ChrI	19687520	19689350
ChrI	19691391	19692215
ChrI	19751126	19754566
ChrI	19756456	19757991
ChrI	19779859	19781022
ChrI	19781760	19788183
ChrI	19789277	19791852
ChrI	19816220	19817918
ChrI	19819063	19819870
ChrI	19833771	19838894
ChrI	19840922	19841932
ChrI	19865231	19865493
ChrI	19869975	19870193
ChrI	19871432	19876456
ChrI	19877973	19878452
ChrI	19886170	19886550
ChrI	19911307	19916935
ChrI	19936701	19937018
ChrI	19959521	19960243
ChrI	19983124	19983985
ChrI	19988775	19989523
ChrI	20005768	20005982
ChrI	20010285	20010624
ChrI	20060977	20061357
ChrI	20164051	20164259
ChrI	20213437	20214943
ChrI	20259546	20259795
ChrI	20274196	20274389
ChrI	20290122	20290518
ChrI	20293476	20294690
ChrI	20297140	20298783
ChrI	20300521	20302372
ChrI	20313223	20314145
ChrI	20376126	20377690
ChrI	20387419	20390285
ChrI	20391067	20391937
ChrI	20404464	20407660
ChrI	20428207	20430464
ChrI	20437077	20437680
ChrI	20439447	20439807
ChrI	20443658	20444385
ChrI	20445614	20446451
ChrI	20452799	20452996
ChrI	20461613	20462716
ChrI	20464068	20465952
ChrI	20472958	20475909
ChrI	20504655	20505135
ChrI	20564982	20565253
ChrI	20575129	20575805
ChrI	20602025	20602715
ChrI	20643800	20647266
ChrI	20656577	20658017
ChrI	20676369	20678500
ChrI	20684707	20685256
ChrI	20702603	20704053
ChrI	20709776	20710279
ChrI	20712426	20712978
ChrI	20734817	20736978
ChrI	20755012	20755464
ChrI	20764215	20768529
ChrI	20769441	20771851
ChrI	20774452	20774744
ChrI	20813268	20814212
ChrI	20816171	20817389
ChrI	20819820	20820129
ChrI	20821882	20829428
ChrI	20834360	20834762
ChrI	20839533	20840457
ChrI	20841808	20843966
ChrI	20853425	20854468
ChrI	20861569	20868643
ChrI	20871071	20874304
ChrI	20882993	20885496
ChrI	20900093	20903166
ChrI	20911747	20915315
ChrI	20918486	20920730
ChrI	20960068	20960488
ChrI	20961317	20961798
ChrI	20964087	20964282
ChrI	20973661	20975167
ChrI	20997016	20997797
ChrI	21003390	21005494
ChrI	21070109	21071363
ChrI	21101719	21104558
ChrI	21127704	21129868
ChrI	21136417	21136889
ChrI	21139364	21139814
ChrI	21151755	21155812
ChrI	21157714	21159008
ChrI	21167123	21172053
ChrI	21173762	21174763
ChrI	21181919	21183301
ChrI	21204541	21205241
ChrI	21208944	21209902
ChrI	21225278	21227369
ChrI	21228088	21229093
ChrI	21233567	21236130
ChrI	21237143	21244619
ChrI	21245400	21248279
ChrI	21258032	21262705
ChrI	21266706	21268496
ChrI	21270986	21274725
ChrI	21284748	21286972
ChrI	21292895	21293428
ChrI	21302906	21304975
ChrI	21311199	21312863
ChrI	21344459	21346036
ChrI	21347231	21347827
ChrI	21348577	21350045
ChrI	21369720	21371119
ChrI	21373016	21373340
ChrI	21374257	21374953
ChrI	21376139	21377395
ChrI	21411711	21412089
ChrI	21414307	21416122
ChrI	21438367	21439303
ChrI	21448856	21452272
ChrI	21466813	21469643
ChrI	21470348	21470821
ChrI	21471632	21472173
ChrI	21491793	21493436
ChrI	21508109	21508397
ChrI	21520468	21520918
ChrI	21543800	21547629
ChrI	21562373	21562606
ChrI	21568380	21569599
ChrI	21571893	21572574
ChrI	21582737	21585302
ChrI	21586230	21591055
ChrI	21594393	21594804
ChrI	21599245	21604545
ChrI	21605259	21608548
ChrI	21613443	21617074
ChrI	21659497	21661183
ChrI	21679172	21679744
ChrI	21706050	21707423
ChrI	21720107	21720580
ChrI	21754137	21755523
ChrI	21772413	21773743
ChrI	21796246	21798352
ChrI	21824031	21825629
ChrI	21826714	21828089
ChrI	21846452	21846642
ChrI	21847367	21848797
ChrI	21851627	21855123
ChrI	21855987	21856626
ChrI	21857439	21858749
ChrI	21859769	21862491
ChrI	21873732	21875689
ChrI	21876451	21876743
ChrI	21877477	21877935
ChrI	21906290	21907452
ChrI	21915393	21916947
ChrI	21917883	21919406
ChrI	21920199	21922443
ChrI	21923228	21925262
ChrI	21931360	21935815
ChrI	21940725	21941396
ChrI	21942652	21946469
ChrI	21953552	21955576
ChrI	21957122	21957883
ChrI	21964123	21965142
ChrI	21972735	21975004
ChrI	21984716	21985441
ChrI	21999358	21999582
ChrI	22000723	22002232
ChrI	22046426	22046737
ChrI	22049879	22050081
ChrI	22051828	22056366
ChrI	22062393	22063281
ChrI	22066005	22066459
ChrI	22075671	22076246
ChrI	22098458	22098658
ChrI	22119913	22122809
ChrI	22138224	22139824
ChrI	22146741	22150893
ChrI	22154198	22155098
ChrI	22174712	22175356
ChrI	22180866	22181281
ChrI	22220457	22220757
ChrI	22238957	22239156
ChrI	22241486	22241679
ChrI	22243816	22244117
ChrI	22284460	22285526
ChrI	22286363	22287128
ChrI	22338793	22339945
ChrI	22349883	22352009
ChrI	22382277	22383214
ChrI	22422559	22422997
ChrI	22427089	22427357
ChrI	22449318	22450584
ChrI	22451468	22451750
ChrI	22463032	22464424
ChrI	22465834	22466382
ChrI	22469621	22470574
ChrI	22478459	22479070
ChrI	22517186	22520067
ChrI	22520851	22521707
ChrI	22615040	22615974
ChrI	22618005	22628728
ChrI	22630714	22633405
ChrI	22651139	22651874
ChrI	22656009	22656575
ChrI	22661504	22662063
ChrI	22665415	22666354
ChrI	22670121	22670769
ChrI	22675961	22676240
ChrI	22698622	22699363
ChrI	22707937	22708932
ChrI	22714456	22715795
ChrI	22738213	22738816
ChrI	22785810	22786824
ChrI	22789422	22789622
ChrI	22790698	22792105
ChrI	22793444	22794165
ChrI	22807217	22808668
ChrI	22811315	22814421
ChrI	22816690	22818046
ChrI	22818793	22819619
ChrI	22822499	22828231
ChrI	22841248	22841616
ChrI	22843627	22844547
ChrI	22913437	22914301
ChrI	22915210	22916373
ChrI	22933608	22933847
ChrI	22954392	22955147
ChrI	22981266	22986804
ChrI	23002218	23003754
ChrI	23020596	23023563
ChrI	23024355	23024694
ChrI	23030629	23030840
ChrI	23031764	23035717
ChrI	23042190	23044155
ChrI	23045088	23046626
ChrI	23053469	23061699
ChrI	23134699	23135909
ChrI	23137368	23141446
ChrI	23143805	23144815
ChrI	23191351	23192671
ChrI	23214050	23215040
ChrI	23246472	23247132
ChrI	23260876	23263656
ChrI	23279460	23282920
ChrI	23312429	23315671
ChrI	23316542	23316761
ChrI	23317520	23319106
ChrI	23324850	23328300
ChrI	23329088	23330121
ChrI	23332838	23333148
ChrI	23334250	23338780
ChrI	23388486	23389021
ChrI	23389781	23390428
ChrI	23394155	23398578
ChrI	23399293	23408051
ChrI	23409174	23411273
ChrI	23412262	23418776
ChrI	23419885	23420468
ChrI	23421388	23422220
ChrI	23437536	23438870
ChrI	23442829	23447006
ChrI	23448922	23458049
ChrI	23462547	23462924
ChrI	23482712	23485170
ChrI	23532446	23535118
ChrI	23539180	23539702
ChrI	23542782	23544717
ChrI	23546105	23549995
ChrI	23588926	23589676
ChrI	23620360	23621601
ChrI	23670396	23676191
ChrI	23716936	23722411
ChrI	23750950	23754164
ChrI	23755117	23755475
ChrI	23757952	23758137
ChrI	23771000	23772897
ChrI	23775816	23776202
ChrI	23780600	23780865
ChrI	23813940	23814838
ChrI	23824782	23825857
ChrI	23904586	23906651
ChrI	23951126	23952227
ChrI	23972714	23973249
ChrI	24062249	24063517
ChrI	24086847	24087814
ChrI	24094347	24100739
ChrI	24142129	24142512
ChrI	24143402	24144380
ChrI	24150302	24151303
ChrI	24229840	24232441
ChrI	24233779	24234061
ChrI	24242212	24243680
ChrI	24252206	24252730
ChrI	24254294	24257814
ChrI	24279619	24280297
ChrI	24283962	24284710
ChrI	24288730	24290636
ChrI	24295778	24298517
ChrI	24347406	24348898
ChrI	24350083	24350448
ChrI	24351483	24364840
ChrI	24365603	24375367
ChrI	24376100	24377171
ChrI	24378422	24379788
ChrI	24380521	24381221
ChrI	24382028	24386597
ChrI	24427959	24428839
ChrI	24436945	24437221
ChrI	24523292	24523805
ChrI	24550583	24551154
ChrI	24553130	24553421
ChrI	24626214	24627517
ChrI	24636844	24637843
ChrI	24644915	24645493
ChrI	24662184	24662644
ChrI	24667570	24669262
ChrI	24704357	24705523
ChrI	24721378	24724419
ChrI	24725325	24725962
ChrI	24728384	24729580
ChrI	24763177	24769159
ChrI	24770548	24770820
ChrI	24797449	24798430
ChrI	24800283	24801151
ChrI	24803233	24806670
ChrI	24807573	24819174
ChrI	24820248	24822223
ChrI	24838110	24838661
ChrI	24854965	24855796
ChrI	24922481	24925909
ChrI	24941355	24942439
ChrI	24953282	24968993
ChrI	24983582	24985040
ChrI	25018542	25019063
ChrI	25027358	25028218
ChrI	25031457	25032940
ChrI	25035620	25036149
ChrI	25039004	25039881
ChrI	25041145	25042362
ChrI	25043118	25043303
ChrI	25044774	25045659
ChrI	25050284	25050813
ChrI	25122597	25122933
ChrI	25124843	25125030
ChrI	25145866	25146688
ChrI	25158888	25161857
ChrI	25166030	25166253
ChrI	25172219	25173621
ChrI	25180138	25180731
ChrI	25222346	25222682
ChrI	25245022	25246575
ChrI	25259587	25261096
ChrI	25323752	25325764
ChrI	25373787	25383862
ChrI	25394546	25396456
ChrI	25401969	25402686
ChrI	25414600	25415685
ChrI	25419868	25420192
ChrI	25488262	25490299
ChrI	25509034	25510017
ChrI	25530648	25531390
ChrI	25532598	25532981
ChrI	25533877	25536330
ChrI	25572876	25574800
ChrI	25577007	25578030
ChrI	25579008	25579543
ChrI	25589935	25590632
ChrI	25600699	25602356
ChrI	25604012	25604903
ChrI	25614229	25615427
ChrI	25621966	25623163
ChrI	25637781	25639680
ChrI	25652753	25652970
ChrI	25673894	25674246
ChrI	25674962	25676483
ChrI	25683105	25683379
ChrI	25713223	25715480
ChrI	25720363	25720591
ChrI	25725783	25727649
ChrI	25728354	25730147
ChrI	25731381	25731914
ChrI	25742702	25745596
ChrI	25755554	25757051
ChrI	25845276	25847019
ChrI	25848728	25849848
ChrI	25869273	25870076
ChrI	25873957	25874736
ChrI	25881048	25881332
ChrI	25926422	25926764
ChrI	25938065	25938785
ChrI	25960338	25960530
ChrI	25961532	25962734
ChrI	25963524	25967202
ChrI	26033868	26035697
ChrI	26042783	26043516
[truncated: 9,748 more rows]

## Sheet: H3K36me3
Chr	start	stop
ChrI	264	1285
ChrI	5490	6235
ChrI	9943	10147
ChrI	25002	25576
ChrI	27442	27650
ChrI	55884	57726
ChrI	60674	61869
ChrI	63824	64408
ChrI	65106	75343
ChrI	75982	109762
ChrI	110802	122375
ChrI	123516	137541
ChrI	150964	151613
ChrI	177106	177811
ChrI	185723	195855
ChrI	218511	219080
ChrI	219778	220620
ChrI	223740	229017
ChrI	231735	246662
ChrI	247354	252300
ChrI	255085	269736
ChrI	282613	297631
ChrI	298553	299364
ChrI	342902	344027
ChrI	345028	345936
ChrI	351853	354631
ChrI	355272	405233
ChrI	405862	407655
ChrI	408572	418952
ChrI	519671	527136
ChrI	529623	534984
ChrI	535793	537835
ChrI	540085	544511
ChrI	550624	582890
ChrI	583824	587591
ChrI	631323	666551
ChrI	668751	671109
ChrI	674318	681023
ChrI	681719	697926
ChrI	699365	700200
ChrI	701160	708739
ChrI	711794	714990
ChrI	716086	720209
ChrI	723484	725148
ChrI	727224	736695
ChrI	737420	741957
ChrI	742876	746233
ChrI	782507	783125
ChrI	786825	787274
ChrI	788925	790687
ChrI	791959	792297
ChrI	865040	865959
ChrI	869278	877754
ChrI	1036329	1040281
ChrI	1107770	1110472
ChrI	1309345	1322731
ChrI	1374759	1375323
ChrI	1441279	1441851
ChrI	1443172	1444281
ChrI	1522382	1522613
ChrI	1781272	1781630
ChrI	1798490	1808939
ChrI	1809621	1817723
ChrI	1818865	1823993
ChrI	1824676	1847534
ChrI	1848671	1856181
ChrI	1857314	1860207
ChrI	1863266	1870625
ChrI	1954697	1962831
ChrI	1987542	1989806
ChrI	1991058	1991489
ChrI	1993790	1998758
ChrI	2000526	2002304
ChrI	2003463	2003888
ChrI	2005330	2008984
ChrI	2009865	2011064
ChrI	2012290	2014730
ChrI	2017646	2018771
ChrI	2019532	2023442
ChrI	2026051	2026428
ChrI	2027149	2038630
ChrI	2042923	2061815
ChrI	2062989	2068468
ChrI	2081209	2085197
ChrI	2086151	2088003
ChrI	2090554	2103622
ChrI	2107807	2112483
ChrI	2132508	2146186
ChrI	2147313	2148605
ChrI	2151562	2160840
ChrI	2168072	2175981
ChrI	2178797	2179381
ChrI	2181627	2198211
ChrI	2198859	2199658
ChrI	2272435	2274737
ChrI	2275495	2281018
ChrI	2282201	2282375
ChrI	2283380	2288445
ChrI	2289661	2295674
ChrI	2296507	2301768
ChrI	2309175	2310626
ChrI	2314531	2325962
ChrI	2327238	2328491
ChrI	2442831	2448189
ChrI	2448803	2458431
ChrI	2459686	2478294
ChrI	2480844	2485236
ChrI	2487614	2489797
ChrI	2493480	2504984
ChrI	2582181	2610911
ChrI	2614350	2616573
ChrI	2620062	2621095
ChrI	2638051	2638393
ChrI	2639020	2640585
ChrI	2682097	2689197
ChrI	2719987	2726323
ChrI	2727194	2729186
ChrI	2730057	2733296
ChrI	2740059	2741938
ChrI	2789567	2791363
ChrI	2798243	2801693
ChrI	2913458	2914308
ChrI	2916724	2917375
ChrI	2937385	2940922
ChrI	2943631	2955176
ChrI	2955914	2956910
ChrI	2959775	2991601
ChrI	3060534	3068039
ChrI	3068696	3079330
ChrI	3104563	3104971
ChrI	3129743	3131696
ChrI	3201313	3203007
ChrI	3206208	3236179
ChrI	3336989	3337918
ChrI	3443904	3444242
ChrI	3607727	3622775
ChrI	3624473	3624896
ChrI	3627146	3634189
ChrI	3635016	3637181
ChrI	3643555	3650217
ChrI	3651266	3657230
ChrI	3658826	3661100
ChrI	3664335	3670218
ChrI	3681690	3684084
ChrI	3685114	3685616
ChrI	3687592	3695165
ChrI	3696017	3699411
ChrI	3723725	3725176
ChrI	3737497	3738897
ChrI	3742047	3743367
ChrI	3744345	3751431
ChrI	3790395	3798284
ChrI	3993092	3995199
ChrI	3996398	3998916
ChrI	3999920	4003757
ChrI	4004526	4006278
ChrI	4173616	4176451
ChrI	4177437	4182368
ChrI	4185612	4200645
ChrI	4201372	4214573
ChrI	4215441	4218365
ChrI	4219126	4221345
ChrI	4222134	4227015
ChrI	4227870	4230494
ChrI	4231658	4234111
ChrI	4267797	4268320
ChrI	4302945	4316176
ChrI	4323777	4324043
ChrI	4325315	4332060
ChrI	4341877	4343173
ChrI	4352064	4360419
ChrI	4361188	4378222
ChrI	4379410	4409390
ChrI	4520622	4541336
ChrI	4544327	4548247
ChrI	4549415	4560005
ChrI	4572061	4572613
ChrI	4573601	4597218
ChrI	4618256	4626576
ChrI	4634500	4638012
ChrI	4638991	4639956
ChrI	4640641	4645259
ChrI	4646129	4664664
ChrI	4669869	4679566
ChrI	4680595	4684116
ChrI	4685234	4691600
ChrI	4693850	4695257
ChrI	4732067	4733302
ChrI	4788020	4808393
ChrI	4809418	4810055
ChrI	4810949	4812817
ChrI	4815428	4817092
ChrI	4818762	4828231
ChrI	4828981	4834010
ChrI	4842608	4843158
ChrI	4869105	4887651
ChrI	4888403	4893176
ChrI	4895548	4895995
ChrI	4896639	4898240
ChrI	4922287	4922965
ChrI	4928968	4933596
ChrI	4937865	4947655
ChrI	4948416	4955860
ChrI	4966769	4977039
ChrI	4977761	4980868
ChrI	4987310	4987782
ChrI	4993197	4993515
ChrI	4994337	5018165
ChrI	5021513	5028280
ChrI	5034807	5036653
ChrI	5080130	5083559
ChrI	5084957	5085996
ChrI	5086828	5087330
ChrI	5136889	5140696
ChrI	5154452	5155176
ChrI	5155976	5160162
ChrI	5186359	5190338
ChrI	5203853	5204258
ChrI	5207127	5209406
ChrI	5210172	5213270
ChrI	5213985	5227497
ChrI	5228353	5249735
ChrI	5289861	5296073
ChrI	5324625	5339408
ChrI	5340586	5352746
ChrI	5353841	5354214
ChrI	5355021	5367473
ChrI	5368547	5379446
ChrI	5407114	5407958
ChrI	5411878	5414274
ChrI	5420512	5429354
ChrI	5431915	5432879
ChrI	5433875	5440312
ChrI	5494028	5496539
ChrI	5497162	5498966
ChrI	5504119	5511512
ChrI	5512374	5515370
ChrI	5538180	5543886
ChrI	5545484	5551394
ChrI	5573599	5576695
ChrI	5646800	5647927
ChrI	5687795	5692522
ChrI	5693664	5729489
ChrI	5733953	5734801
ChrI	5742505	5746780
ChrI	5748154	5752535
ChrI	5790130	5794201
ChrI	5798605	5798798
ChrI	5799733	5800009
ChrI	5800775	5802059
ChrI	5805590	5806042
ChrI	5831203	5833903
ChrI	5849725	5850237
ChrI	5877058	5877401
ChrI	5952536	5952740
ChrI	5955474	5958447
ChrI	5959875	5960941
ChrI	5961785	5963012
ChrI	5967175	5988652
ChrI	5991587	5993543
ChrI	5994819	5995554
ChrI	5996485	6002440
ChrI	6060239	6060972
ChrI	6061598	6061973
ChrI	6064781	6067417
ChrI	6071379	6075968
ChrI	6101518	6102162
ChrI	6158516	6160895
ChrI	6213953	6214470
ChrI	6236744	6239326
ChrI	6240447	6243138
ChrI	6245276	6246860
ChrI	6264781	6265354
ChrI	6266509	6267126
ChrI	6300692	6312216
ChrI	6312979	6315352
ChrI	6315981	6323741
ChrI	6324483	6328962
ChrI	6329680	6331891
ChrI	6333621	6341492
ChrI	6346134	6352607
ChrI	6353626	6354941
ChrI	6360782	6369480
ChrI	6370334	6378876
ChrI	6384195	6391450
ChrI	6393225	6395891
ChrI	6405497	6416204
ChrI	6432796	6433199
ChrI	6450731	6457358
ChrI	6458586	6458840
ChrI	6460780	6466696
ChrI	6584690	6586402
ChrI	6588446	6588816
ChrI	6589600	6591364
ChrI	6649361	6649766
ChrI	6650427	6651019
ChrI	6670145	6670378
ChrI	6763153	6765970
ChrI	6769076	6777016
ChrI	6781863	6784916
ChrI	6786358	6791662
ChrI	6852531	6853037
ChrI	6901404	6901965
ChrI	6961624	6962646
ChrI	7117543	7118005
ChrI	7132473	7135970
ChrI	7138170	7144953
ChrI	7145934	7149145
ChrI	7149789	7150049
ChrI	7152498	7153155
ChrI	7154852	7155125
ChrI	7155923	7156651
ChrI	7162883	7177032
ChrI	7178511	7181048
ChrI	7187444	7193857
ChrI	7212584	7213338
ChrI	7220801	7224082
ChrI	7225577	7225757
ChrI	7226549	7232702
ChrI	7233938	7242108
ChrI	7250695	7257088
ChrI	7258332	7258582
ChrI	7259301	7259848
ChrI	7268310	7278789
ChrI	7279608	7289119
ChrI	7290091	7296075
ChrI	7350112	7351035
ChrI	7357728	7358081
ChrI	7398364	7419956
ChrI	7452815	7465576
ChrI	7467250	7468112
ChrI	7469730	7471427
ChrI	7473176	7486544
ChrI	7487710	7489140
ChrI	7525102	7525655
ChrI	7529647	7531184
ChrI	7545156	7556694
ChrI	7558193	7559807
ChrI	7562013	7562190
ChrI	7563119	7574318
ChrI	7576165	7577870
ChrI	7578895	7579498
ChrI	7584277	7585341
ChrI	7587559	7592179
ChrI	7592792	7594729
ChrI	7596255	7601128
ChrI	7602751	7608034
ChrI	7608650	7609416
ChrI	7610595	7611772
ChrI	7612723	7613153
ChrI	7616673	7619054
ChrI	7621412	7625935
ChrI	7631446	7640861
ChrI	7722868	7729445
ChrI	7730712	7735508
ChrI	7745459	7745669
ChrI	7762638	7763778
ChrI	7765464	7768202
ChrI	7771647	7771912
ChrI	7772688	7773254
ChrI	7773882	7774308
ChrI	7775159	7775590
ChrI	7778926	7779559
ChrI	7780260	7783155
ChrI	7784986	7787945
ChrI	7788596	7789926
ChrI	7796718	7799774
ChrI	7800442	7809744
ChrI	7810657	7812026
ChrI	7813626	7814487
ChrI	7815351	7817782
ChrI	7824609	7826359
ChrI	7827807	7835103
ChrI	7846712	7848094
ChrI	7867363	7874311
ChrI	7875294	7879709
ChrI	7884509	7885339
ChrI	7961969	7962281
ChrI	8011955	8014333
ChrI	8025232	8033437
ChrI	8048191	8048508
ChrI	8055773	8067784
ChrI	8072083	8076749
ChrI	8080307	8081275
ChrI	8082008	8086335
ChrI	8089852	8097743
ChrI	8098819	8099180
ChrI	8101768	8111267
ChrI	8117797	8125213
ChrI	8126324	8135494
ChrI	8136827	8139046
ChrI	8140713	8147276
ChrI	8153683	8156942
ChrI	8157867	8160253
ChrI	8161633	8164618
ChrI	8176474	8177668
ChrI	8189814	8192151
ChrI	8193437	8195543
ChrI	8199275	8202051
ChrI	8256246	8261647
ChrI	8264947	8274789
ChrI	8278951	8280508
ChrI	8281448	8305508
ChrI	8307960	8308650
ChrI	8316670	8317538
ChrI	8331197	8331469
ChrI	8633622	8634151
ChrI	8639022	8639581
ChrI	8641064	8641497
ChrI	8645621	8646355
ChrI	8647896	8648506
ChrI	8702383	8708784
ChrI	8709739	8710924
ChrI	8711667	8711832
ChrI	8712972	8716061
ChrI	8716694	8717034
ChrI	8717966	8736332
ChrI	8740998	8745579
ChrI	8747091	8747420
ChrI	8750910	8764275
ChrI	8867104	8876277
ChrI	8879812	8881255
ChrI	8895206	8900123
ChrI	8902154	8905224
ChrI	8919374	8919609
ChrI	8960665	8969102
ChrI	8971870	8972091
ChrI	8989202	8991859
ChrI	9017346	9018384
ChrI	9019308	9019640
ChrI	9021600	9022751
ChrI	9036372	9038551
ChrI	9039442	9041151
ChrI	9083278	9084149
ChrI	9085059	9085874
ChrI	9112890	9114135
ChrI	9120012	9123529
ChrI	9127013	9128562
ChrI	9130249	9137521
ChrI	9141156	9141391
ChrI	9142109	9158077
ChrI	9171538	9172682
ChrI	9173882	9174681
ChrI	9175787	9176097
ChrI	9177932	9178461
ChrI	9194500	9194754
ChrI	9203534	9203692
ChrI	9218730	9220004
ChrI	9220740	9220903
ChrI	9233684	9234071
ChrI	9245375	9245726
ChrI	9265055	9265852
ChrI	9266519	9269261
ChrI	9271777	9277449
ChrI	9278955	9285961
ChrI	9287206	9291941
ChrI	9293800	9294028
ChrI	9294890	9295177
ChrI	9309775	9310142
ChrI	9313872	9314094
ChrI	9368698	9371108
ChrI	9373139	9373720
ChrI	9392274	9392760
ChrI	9416282	9418443
ChrI	9421586	9425187
ChrI	9426115	9445151
ChrI	9446399	9447561
ChrI	9449029	9459079
ChrI	9483781	9486139
ChrI	9489494	9492636
ChrI	9493519	9495770
ChrI	9496487	9510066
ChrI	9516431	9518833
ChrI	9525536	9526116
ChrI	9529636	9531395
ChrI	9534478	9535603
ChrI	9536496	9537670
ChrI	9540986	9541936
ChrI	9551686	9554439
ChrI	9555528	9558530
ChrI	9560088	9569640
ChrI	9573294	9575393
ChrI	9577267	9579340
ChrI	9581870	9582046
ChrI	9584971	9586870
ChrI	9599815	9600341
ChrI	9612636	9615310
ChrI	9670141	9673209
ChrI	9680961	9691723
ChrI	9698609	9699484
ChrI	9700120	9708639
ChrI	9714262	9716106
ChrI	9741362	9741622
ChrI	9743944	9752947
ChrI	9754204	9755733
ChrI	9759994	9760364
ChrI	9761052	9761557
ChrI	9762462	9763525
ChrI	9764307	9766406
ChrI	9769062	9770394
ChrI	9776038	9776204
ChrI	9782808	9784232
ChrI	9786026	9788751
ChrI	9802886	9803940
ChrI	9805318	9807594
ChrI	9810265	9813021
ChrI	9813693	9820751
ChrI	9822643	9826935
ChrI	9838290	9840886
ChrI	9842589	9842823
ChrI	9843754	9843986
ChrI	9844895	9845347
ChrI	9846337	9848812
ChrI	9851016	9857287
ChrI	9858277	9861381
ChrI	9862176	9863236
ChrI	9876563	9877102
ChrI	9878818	9879061
ChrI	9881757	9883422
ChrI	9886986	9887659
ChrI	9895251	9897804
ChrI	9921636	9925746
ChrI	9947098	9948033
ChrI	9970571	9971390
ChrI	9982789	9988762
ChrI	9990601	9994061
ChrI	9996549	9996823
ChrI	9997611	10002922
ChrI	10003546	10006337
ChrI	10013335	10013738
ChrI	10017095	10026476
ChrI	10027181	10032162
ChrI	10032788	10044047
ChrI	10046173	10046410
ChrI	10057020	10062257
ChrI	10063141	10066893
ChrI	10073948	10077837
ChrI	10078948	10083546
ChrI	10088370	10089293
ChrI	10110363	10111016
ChrI	10111987	10112334
ChrI	10117621	10118471
ChrI	10119381	10119620
ChrI	10129484	10130063
ChrI	10133050	10134008
ChrI	10135160	10135888
ChrI	10136914	10159835
ChrI	10160981	10169383
ChrI	10171074	10171541
ChrI	10174360	10192483
ChrI	10193367	10196690
ChrI	10197610	10203149
ChrI	10211820	10213356
ChrI	10232918	10237044
ChrI	10298055	10298685
ChrI	10302138	10302444
ChrI	10315925	10316124
ChrI	10321567	10321784
ChrI	10322930	10324996
ChrI	10326204	10326668
ChrI	10328740	10329116
ChrI	10329752	10330535
ChrI	10331926	10332846
ChrI	10333784	10334604
ChrI	10335559	10335789
ChrI	10338915	10340812
ChrI	10342403	10342722
ChrI	10343571	10343745
ChrI	10346993	10347920
ChrI	10349043	10349319
ChrI	10356013	10356372
ChrI	10359810	10360016
ChrI	10361091	10368925
ChrI	10369789	10378922
ChrI	10384329	10385284
ChrI	10386881	10389835
ChrI	10392537	10393206
ChrI	10400567	10404915
ChrI	10405608	10407325
ChrI	10410259	10423114
ChrI	10423924	10429392
ChrI	10434177	10434472
ChrI	10441354	10446189
ChrI	10447464	10466084
ChrI	10466726	10469770
ChrI	10470455	10479482
ChrI	10480167	10481454
ChrI	10484473	10485005
ChrI	10485919	10487144
ChrI	10489310	10490059
ChrI	10490831	10493722
ChrI	10495885	10503283
ChrI	10504238	10511239
ChrI	10512360	10512612
ChrI	10515197	10518811
ChrI	10519891	10525680
ChrI	10570223	10570698
ChrI	10573090	10574932
ChrI	10578061	10578580
ChrI	10582510	10585293
ChrI	10586606	10586955
ChrI	10588599	10589484
ChrI	10590155	10590580
ChrI	10592518	10596754
ChrI	10597452	10597965
ChrI	10600113	10602345
ChrI	10603010	10605925
ChrI	10606993	10613709
ChrI	10616344	10628852
ChrI	10629474	10640521
ChrI	10641845	10659292
ChrI	10665471	10665992
ChrI	10666881	10667547
ChrI	10669133	10671117
ChrI	10672445	10675786
ChrI	10678286	10678875
ChrI	10680906	10681420
ChrI	10682793	10683447
ChrI	10686717	10686912
ChrI	10694787	10695929
ChrI	10696713	10700098
ChrI	10702454	10709798
ChrI	10714560	10717527
ChrI	10722715	10725463
ChrI	10730337	10730579
ChrI	10733675	10734261
ChrI	10738061	10738430
ChrI	10743013	10743664
ChrI	10745615	10746950
ChrI	10750734	10752618
ChrI	10759231	10759405
ChrI	10761728	10764179
ChrI	10768648	10775713
ChrI	10776687	10785580
ChrI	10801267	10801671
ChrI	10812282	10812511
ChrI	10813148	10819135
ChrI	10860034	10864826
ChrI	10865993	10869336
ChrI	10873248	10874680
ChrI	10881513	10882078
ChrI	10891185	10903790
ChrI	10908405	10910746
ChrI	10952876	10955939
ChrI	10956712	10959727
ChrI	10962313	10964152
ChrI	10965707	10972011
ChrI	10972635	10976652
ChrI	10977271	10977962
ChrI	10979757	10981768
ChrI	10986480	10988126
ChrI	10989869	10994716
ChrI	10995622	10996330
ChrI	11004660	11005821
ChrI	11008351	11008607
ChrI	11009330	11014371
ChrI	11016169	11035997
ChrI	11037039	11040648
ChrI	11041330	11050850
ChrI	11054777	11056670
ChrI	11063537	11075794
ChrI	11076416	11079126
ChrI	11079762	11089460
ChrI	11090397	11090563
ChrI	11092121	11112344
ChrI	11119864	11120751
ChrI	11122663	11126762
ChrI	11130186	11131175
ChrI	11132410	11132988
ChrI	11133672	11135685
ChrI	11136734	11137901
ChrI	11138664	11139222
ChrI	11150506	11163588
ChrI	11164697	11167545
ChrI	11168461	11169070
ChrI	11170411	11171888
ChrI	11176953	11177395
ChrI	11186508	11187204
ChrI	11189948	11190892
ChrI	11191648	11193406
ChrI	11195702	11197963
ChrI	11200343	11203422
ChrI	11204937	11205874
ChrI	11207020	11214227
ChrI	11222160	11223442
ChrI	11224075	11230860
ChrI	11231730	11245257
ChrI	11245977	11248248
ChrI	11249013	11252543
ChrI	11253306	11256941
ChrI	11264511	11267276
ChrI	11267971	11274525
ChrI	11277383	11280408
ChrI	11281287	11281630
ChrI	11283252	11294665
ChrI	11295480	11297866
ChrI	11298613	11300463
ChrI	11304621	11305391
ChrI	11307736	11310868
ChrI	11311699	11312373
ChrI	11315223	11315393
ChrI	11318839	11319336
ChrI	11321131	11321708
ChrI	11324256	11326306
ChrI	11327235	11330130
ChrI	11335355	11340176
ChrI	11344438	11345478
ChrI	11349235	11356129
ChrI	11357734	11358292
ChrI	11360039	11361418
ChrI	11364503	11365305
ChrI	11367824	11369852
ChrI	11370491	11371639
ChrI	11373391	11376047
ChrI	11387519	11389099
ChrI	11397731	11398538
ChrI	11400015	11403782
ChrI	11412367	11413829
ChrI	11414691	11428078
ChrI	11439511	11441096
ChrI	11441709	11444993
ChrI	11446302	11449680
ChrI	11450456	11452231
ChrI	11453307	11476757
ChrI	11478229	11482347
ChrI	11483130	11483370
ChrI	11484086	11495442
ChrI	11500515	11500771
ChrI	11501997	11519732
ChrI	11520378	11522475
ChrI	11523226	11523946
ChrI	11524674	11526548
ChrI	11528631	11532802
ChrI	11533531	11533899
ChrI	11538185	11538816
ChrI	11550092	11552913
ChrI	11554030	11557459
ChrI	11560926	11561556
ChrI	11567054	11567903
ChrI	11571232	11573089
ChrI	11574054	11577711
ChrI	11579931	11581462
ChrI	11582429	11583073
ChrI	11586330	11586828
ChrI	11588390	11595885
ChrI	11596806	11601587
ChrI	11603775	11608473
ChrI	11609514	11617604
ChrI	11682636	11683530
ChrI	11684430	11694684
ChrI	11718043	11718358
ChrI	11727908	11736911
ChrI	11737984	11743027
ChrI	11752366	11757340
ChrI	11776697	11784303
ChrI	11819581	11822961
ChrI	11823795	11829016
ChrI	11837153	11837482
ChrI	11841808	11842136
ChrI	11843232	11845428
ChrI	11846049	11848119
ChrI	11852187	11852700
ChrI	11853513	11854377
ChrI	11855400	11856029
ChrI	11894069	11894676
ChrI	11895297	11899388
ChrI	11900814	11900991
ChrI	11915091	11920675
ChrI	11921383	11921665
ChrI	11924846	11930180
ChrI	11979235	11984137
ChrI	11989747	11993723
ChrI	11995172	11999267
ChrI	12001851	12007543
ChrI	12012768	12013226
ChrI	12030225	12040201
ChrI	12049764	12053093
ChrI	12053787	12058745
ChrI	12065603	12068610
ChrI	12076644	12078146
ChrI	12078900	12080061
ChrI	12084751	12087063
ChrI	12101882	12102110
ChrI	12105327	12105486
ChrI	12107188	12109789
ChrI	12119240	12119777
ChrI	12126961	12133300
ChrI	12134655	12137587
ChrI	12138366	12140644
ChrI	12141494	12144925
ChrI	12148876	12149535
ChrI	12151161	12151479
ChrI	12153298	12154116
ChrI	12155110	12155357
ChrI	12156371	12158050
ChrI	12160490	12162113
ChrI	12166937	12168341
ChrI	12169119	12173191
ChrI	12173940	12176798
ChrI	12179287	12181142
ChrI	12184885	12186904
ChrI	12189783	12201505
ChrI	12203391	12205003
ChrI	12205638	12206315
ChrI	12206977	12212529
ChrI	12216311	12221846
ChrI	12223315	12226544
ChrI	12227703	12232808
ChrI	12234420	12236131
ChrI	12242170	12242617
ChrI	12258234	12261047
ChrI	12264508	12265515
ChrI	12269356	12270527
ChrI	12274457	12281548
ChrI	12284485	12286010
ChrI	12286693	12286848
ChrI	12287516	12287783
ChrI	12294012	12296979
ChrI	12304285	12309698
ChrI	12345363	12349146
ChrI	12352317	12352474
ChrI	12355891	12356317
ChrI	12366058	12366559
ChrI	12367222	12367821
ChrI	12381775	12382020
ChrI	12388028	12406836
ChrI	12410018	12416275
ChrI	12420019	12421232
ChrI	12430551	12431875
ChrI	12436946	12438254
ChrI	12474794	12474948
ChrI	12494481	12498434
ChrI	12507482	12507864
ChrI	12519703	12524658
ChrI	12525733	12526501
ChrI	12527831	12528010
ChrI	12531601	12532272
ChrI	12544882	12546939
ChrI	12552271	12556170
ChrI	12556989	12562869
ChrI	12564110	12569183
ChrI	12569972	12570321
ChrI	12575030	12576372
ChrI	12587280	12587495
ChrI	12593000	12597890
ChrI	12601610	12603127
ChrI	12607640	12612213
ChrI	12614817	12615242
ChrI	12625101	12625530
ChrI	12628765	12635572
ChrI	12638018	12640563
ChrI	12646055	12646319
ChrI	12649313	12653918
ChrI	12656161	12664322
ChrI	12665748	12669146
ChrI	12670122	12670295
ChrI	12675532	12679466
ChrI	12680255	12688649
ChrI	12690118	12701208
ChrI	12702639	12704786
ChrI	12710824	12715334
ChrI	12722302	12725226
ChrI	12727076	12728586
ChrI	12731896	12732383
ChrI	12734910	12737075
ChrI	12746461	12750863
ChrI	12751514	12753417
ChrI	12754944	12771446
ChrI	12772196	12776240
ChrI	12777049	12779216
ChrI	12779968	12783038
ChrI	12784397	12787843
ChrI	12790770	12801273
ChrI	12805846	12806034
ChrI	12807936	12809129
ChrI	12810125	12816919
ChrI	12817896	12818123
ChrI	12819028	12823733
ChrI	12827844	12828015
ChrI	12837315	12841075
ChrI	12842507	12843022
ChrI	12846333	12856917
ChrI	12857792	12859066
ChrI	12860623	12861217
ChrI	12869108	12878035
ChrI	12881571	12888443
ChrI	12890568	12900050
ChrI	12900923	12907848
ChrI	12908683	12909774
ChrI	12922816	12923104
ChrI	12926949	12927156
ChrI	12928163	12928563
ChrI	12930485	12938129
ChrI	12939643	12943319
ChrI	12944185	12955955
ChrI	12958780	12959406
ChrI	12965634	12965916
ChrI	12966789	12975735
ChrI	12976681	12978077
ChrI	12981665	12983114
ChrI	12985741	12986770
ChrI	12990568	12991740
ChrI	13000034	13000865
ChrI	13002612	13013950
ChrI	13019167	13020152
ChrI	13054014	13054837
ChrI	13059472	13064843
ChrI	13065896	13066715
ChrI	13068280	13070302
ChrI	13071284	13071479
ChrI	13072266	13073854
ChrI	13077205	13083804
ChrI	13091279	13101005
ChrI	13102164	13116755
ChrI	13118355	13119002
ChrI	13119831	13120893
ChrI	13122698	13123845
ChrI	13129390	13131266
ChrI	13150080	13156095
ChrI	13156833	13161784
ChrI	13162664	13164515
ChrI	13175847	13176065
ChrI	13177104	13177303
ChrI	13178194	13179300
ChrI	13180252	13181439
ChrI	13182792	13186079
ChrI	13188237	13193475
ChrI	13216921	13217405
ChrI	13220962	13221734
ChrI	13224930	13225212
ChrI	13225945	13226184
ChrI	13226819	13229139
ChrI	13230124	13231102
ChrI	13233749	13234843
ChrI	13237796	13243823
ChrI	13260298	13260791
ChrI	13265980	13267153
ChrI	13272527	13280410
ChrI	13282597	13282914
ChrI	13284359	13291339
ChrI	13293499	13294232
ChrI	13294961	13295604
ChrI	13300150	13300869
ChrI	13302638	13303301
ChrI	13321024	13322764
ChrI	13323474	13324169
ChrI	13337417	13339273
ChrI	13346984	13347714
ChrI	13352885	13353846
ChrI	13356582	13361627
ChrI	13362308	13365747
ChrI	13369107	13374344
ChrI	13378995	13380120
ChrI	13380889	13382613
ChrI	13389648	13390485
ChrI	13391673	13398401
ChrI	13399371	13400771
ChrI	13401895	13404064
ChrI	13405426	13405760
ChrI	13407255	13409149
ChrI	13411653	13413043
ChrI	13413796	13414069
ChrI	13425162	13434565
ChrI	13435823	13440728
ChrI	13450951	13451586
ChrI	13453518	13454408
ChrI	13457642	13457821
ChrI	13458700	13459737
ChrI	13463423	13466524
ChrI	13467368	13467683
ChrI	13478852	13480214
ChrI	13485120	13486408
ChrI	13489651	13490660
ChrI	13491463	13496979
ChrI	13497603	13498295
ChrI	13498940	13500036
ChrI	13510919	13514091
ChrI	13520248	13524684
ChrI	13566613	13568185
ChrI	13568883	13574695
ChrI	13576343	13583145
ChrI	13583815	13587887
ChrI	13589284	13593696
ChrI	13599432	13608975
ChrI	13611801	13611978
ChrI	13612824	13618721
ChrI	13619718	13623723
ChrI	13624556	13646186
ChrI	13647753	13651228
ChrI	13652171	13652504
ChrI	13657571	13660796
ChrI	13694393	13705158
ChrI	13718958	13720640
ChrI	13721741	13722185
ChrI	13728893	13747224
ChrI	13777346	13786218
ChrI	13827166	13827875
ChrI	13830188	13834010
ChrI	13834682	13835417
ChrI	13836736	13837267
ChrI	13846732	13848764
ChrI	13852654	13854433
ChrI	13923980	13924459
ChrI	13925818	13926235
ChrI	13930689	13933121
ChrI	13964354	13980524
ChrI	14013401	14037129
ChrI	14041141	14041920
ChrI	14051002	14054245
ChrI	14055899	14057652
ChrI	14058718	14059069
ChrI	14105473	14105911
ChrI	14107001	14107921
ChrI	14110106	14110311
ChrI	14139725	14147312
ChrI	14149024	14149264
ChrI	14150219	14160690
ChrI	14161350	14175043
ChrI	14176007	14179336
ChrI	14180116	14181961
ChrI	14182810	14191073
ChrI	14192161	14233538
ChrI	14271833	14274211
ChrI	14381118	14382092
ChrI	14395288	14397571
ChrI	14406855	14417933
ChrI	14442490	14443133
ChrI	14450994	14456116
ChrI	14456966	14459214
ChrI	14471299	14472217
ChrI	14478089	14478912
ChrI	14492113	14496118
ChrI	14531133	14535942
ChrI	14538379	14548182
ChrI	14579758	14581851
ChrI	14601084	14601927
ChrI	14620945	14623893
ChrI	14667322	14671363
ChrI	14672596	14681285
ChrI	14682375	14710513
ChrI	14711857	14718744
ChrI	14721878	14723253
ChrI	14724038	14724232
ChrI	14733788	14735367
ChrI	14739272	14746326
ChrI	14751068	14754625
ChrI	14759525	14761799
ChrI	14762608	14768687
ChrI	14772007	14773580
ChrI	14778313	14784992
ChrI	14816237	14828082
ChrI	14828769	14839511
ChrI	14887865	14890779
ChrI	14897802	14901598
ChrI	14937706	14938671
ChrI	14961965	14965161
ChrI	14966036	14966662
ChrI	14985537	14989343
ChrI	14990300	15001325
ChrI	15015338	15018970
ChrI	15021270	15022625
ChrI	15024795	15027467
ChrI	15047866	15051932
ChrI	15095204	15100745
ChrI	15128305	15136035
ChrI	15138076	15139164
ChrI	15139787	15140560
ChrI	15141999	15161223
ChrI	15164758	15165611
ChrI	15174806	15175805
ChrI	15209361	15214352
ChrI	15215035	15217726
ChrI	15222386	15223666
ChrI	15225997	15227907
ChrI	15262588	15264439
ChrI	15281753	15282392
ChrI	15284611	15285724
ChrI	15306407	15318936
ChrI	15319788	15351208
ChrI	15352704	15356132
ChrI	15378140	15381167
ChrI	15558269	15558492
ChrI	15700617	15702620
ChrI	15779149	15779455
ChrI	15889281	15889580
ChrI	15946561	15954949
ChrI	16082618	16090337
ChrI	16131663	16134142
ChrI	16135162	16140957
ChrI	16141640	16143687
ChrI	16144724	16147209
ChrI	16148127	16150935
ChrI	16151961	16153780
ChrI	16155306	16157773
ChrI	16239834	16242488
ChrI	16244900	16260053
ChrI	16261048	16271897
ChrI	16273409	16286137
ChrI	16288271	16294746
ChrI	16312675	16324723
ChrI	16327120	16327809
ChrI	16332058	16337768
ChrI	16343491	16346582
ChrI	16349685	16351029
ChrI	16358811	16359781
ChrI	16362463	16363051
ChrI	16379050	16385500
ChrI	16386550	16390369
ChrI	16404712	16406399
ChrI	16407054	16408906
ChrI	16428893	16437581
ChrI	16447380	16449133
ChrI	16498717	16504435
ChrI	16508898	16509244
ChrI	16732376	16735501
ChrI	16736476	16750787
ChrI	16751446	16752245
ChrI	16759712	16760605
ChrI	16775686	16775905
ChrI	16777178	16780542
ChrI	16781895	16783523
ChrI	16784137	16786034
ChrI	16786972	16793160
ChrI	16794091	16796595
ChrI	16797578	16801541
ChrI	16802228	16806287
ChrI	16844766	16848723
ChrI	16875271	16885468
ChrI	16891832	16892135
ChrI	16908119	16909469
ChrI	16910183	16910375
ChrI	16913066	16913559
ChrI	16915534	16917624
ChrI	16936447	16937497
ChrI	16940361	16948964
ChrI	16950354	16953784
ChrI	16955352	16957965
ChrI	16991072	16992282
ChrI	16994408	16995022
ChrI	16995686	16996906
ChrI	17144603	17147097
ChrI	17149259	17155918
ChrI	17156860	17165640
ChrI	17171301	17180497
ChrI	17190806	17208886
ChrI	17214388	17214600
ChrI	17404452	17405177
ChrI	17406061	17407509
ChrI	17417895	17418191
ChrI	17421868	17431137
ChrI	17431811	17434421
ChrI	17435501	17446309
ChrI	17448234	17448690
ChrI	17449708	17451861
ChrI	17456738	17457795
ChrI	17458742	17459524
ChrI	17463140	17474253
ChrI	17475072	17492159
ChrI	17494347	17509976
ChrI	17515919	17525094
ChrI	17526079	17548992
ChrI	17552181	17563823
ChrI	17570314	17572776
ChrI	17574042	17576556
ChrI	17577701	17582233
ChrI	17585182	17585978
ChrI	17589799	17604492
ChrI	17632805	17633897
ChrI	17649445	17653135
ChrI	17654583	17656228
ChrI	17675547	17676069
ChrI	17678474	17679660
ChrI	17806315	17809116
ChrI	17809871	17814456
ChrI	17833284	17835466
ChrI	17839026	17841122
ChrI	17881152	17885231
ChrI	17974149	17976469
ChrI	17989576	17992012
ChrI	17992938	18020988
ChrI	18022257	18040989
ChrI	18042010	18053840
ChrI	18065973	18066848
ChrI	18069155	18069375
ChrI	18077613	18079976
ChrI	18080966	18081128
ChrI	18082116	18084186
ChrI	18087307	18088815
ChrI	18092512	18109876
ChrI	18126684	18135728
ChrI	18140186	18148342
ChrI	18149213	18153199
ChrI	18156751	18162353
ChrI	18183838	18193382
ChrI	18194381	18230899
ChrI	18242533	18248997
ChrI	18249876	18257207
ChrI	18301810	18302580
ChrI	18304763	18305235
ChrI	18306046	18309776
ChrI	18311278	18311432
ChrI	18312076	18313412
ChrI	18314049	18319549
ChrI	18320379	18325458
ChrI	18402538	18418593
ChrI	18421510	18433302
ChrI	18434535	18436442
ChrI	18438565	18439833
ChrI	18442042	18461802
ChrI	18466821	18468439
ChrI	18474775	18483079
ChrI	18483951	18484753
ChrI	18502843	18503172
ChrI	18516451	18517506
ChrI	18534767	18537437
ChrI	18542288	18564450
ChrI	18565071	18568773
ChrI	18569566	18574304
ChrI	18575258	18579726
ChrI	18581025	18583219
ChrI	18632159	18640585
ChrI	18644547	18653605
ChrI	18674097	18683718
ChrI	18765472	18766154
ChrI	18896929	18898142
ChrI	18898932	18901636
ChrI	18902324	18908739
ChrI	18911088	18911430
ChrI	18913251	18927689
ChrI	18930029	18941188
ChrI	18966577	18976841
ChrI	18977562	18995544
ChrI	19007792	19008449
ChrI	19294192	19294473
ChrI	19362433	19365938
ChrI	19366782	19368771
ChrI	19369661	19371897
ChrI	19372654	19384011
ChrI	19441770	19445225
ChrI	19487331	19487593
ChrI	19492293	19495560
ChrI	19549109	19550037
ChrI	19552176	19561277
ChrI	19566812	19568162
ChrI	19571620	19578529
ChrI	19579447	19581488
ChrI	19582433	19583369
ChrI	19612780	19616471
ChrI	19624495	19634466
ChrI	19774032	19774631
ChrI	19792478	19792766
ChrI	19794341	19797557
ChrI	19825048	19832758
ChrI	19838406	19841046
ChrI	19852667	19853818
ChrI	19854483	19856842
ChrI	19860246	19870382
ChrI	19871925	19881844
ChrI	19882690	19885765
ChrI	19890022	19892796
ChrI	19917383	19927777
ChrI	19960670	19973450
ChrI	19974145	19982425
ChrI	19984223	19988882
ChrI	20013667	20016199
ChrI	20085051	20085224
ChrI	20096817	20098059
ChrI	20099417	20101066
ChrI	20101691	20105981
ChrI	20204532	20209903
ChrI	20210738	20211754
ChrI	20244107	20244668
ChrI	20294279	20297915
ChrI	20298862	20299351
ChrI	20375297	20376231
ChrI	20389494	20405358
ChrI	20406666	20413924
ChrI	20423953	20427866
ChrI	20433936	20436981
ChrI	20440103	20441235
ChrI	20457120	20458396
ChrI	20467176	20470801
ChrI	20533954	20538353
ChrI	20671335	20677008
ChrI	20678208	20683894
ChrI	20684663	20701789
ChrI	20802662	20803028
ChrI	20814759	20823246
ChrI	20828131	20836248
ChrI	20838318	20839166
ChrI	20854100	20863373
ChrI	20865057	20866410
ChrI	20867435	20871756
ChrI	20873385	20875962
ChrI	20876625	20882575
ChrI	20883192	20885032
ChrI	20886156	20901500
ChrI	20902795	20912096
ChrI	20913989	20914502
ChrI	20920422	20920960
ChrI	20921636	20946794
ChrI	20947521	20961126
ChrI	20962067	20974194
ChrI	20988473	21004216
ChrI	21005718	21008430
ChrI	21064281	21070452
ChrI	21073146	21076699
ChrI	21099689	21101576
ChrI	21102930	21108255
ChrI	21118357	21118975
ChrI	21129173	21139414
ChrI	21140541	21150454
ChrI	21155411	21156800
ChrI	21157540	21165828
ChrI	21173005	21182349
ChrI	21184960	21209277
ChrI	21229322	21236160
ChrI	21237014	21237523
ChrI	21239458	21239634
ChrI	21243968	21246918
ChrI	21248123	21260601
ChrI	21261640	21272408
ChrI	21274233	21282456
ChrI	21283264	21292961
ChrI	21293881	21303569
ChrI	21304833	21311936
ChrI	21313095	21318104
ChrI	21320039	21323352
ChrI	21446747	21448638
ChrI	21459141	21459402
ChrI	21460133	21460453
ChrI	21461286	21463242
ChrI	21465320	21465730
ChrI	21472347	21485569
ChrI	21486199	21492559
ChrI	21564766	21566580
ChrI	21567221	21568117
ChrI	21594774	21599836
ChrI	21600874	21602170
ChrI	21609035	21613818
ChrI	21617939	21621556
ChrI	21622559	21623959
ChrI	21624622	21626613
ChrI	21639116	21642555
ChrI	21643224	21650394
ChrI	21651047	21658377
ChrI	21698720	21705962
ChrI	21707798	21717793
ChrI	21734503	21740324
ChrI	21741073	21754529
ChrI	21755735	21759736
ChrI	21760449	21767985
ChrI	21768717	21769806
ChrI	21773681	21776104
ChrI	21777123	21796254
ChrI	21797721	21814414
ChrI	21815517	21815931
ChrI	21817773	21824208
ChrI	21825512	21844920
ChrI	21859331	21860921
ChrI	21862148	21864834
ChrI	21865774	21873367
ChrI	21875444	21877458
ChrI	21878415	21879108
ChrI	21879804	21882394
ChrI	21892298	21894506
ChrI	21907192	21909210
ChrI	21913116	21913564
ChrI	21947355	21948291
ChrI	21949512	21953785
ChrI	21956552	21959150
ChrI	21960177	21961350
ChrI	21962004	21972962
ChrI	21980858	21981171
ChrI	21985243	21988494
ChrI	22031905	22049307
ChrI	22050368	22051870
ChrI	22053421	22054153
ChrI	22056005	22059938
ChrI	22089380	22089807
ChrI	22140853	22145022
ChrI	22145786	22146154
ChrI	22245119	22245633
ChrI	22246805	22247691
ChrI	22248437	22249272
ChrI	22250591	22252169
ChrI	22254746	22255810
ChrI	22387215	22387652
ChrI	22478767	22516927
ChrI	22520744	22527767
ChrI	22528730	22538728
ChrI	22539806	22540074
ChrI	22541030	22541248
ChrI	22541989	22544925
ChrI	22546299	22555468
ChrI	22556093	22556355
ChrI	22562225	22563939
ChrI	22564700	22583908
ChrI	22633217	22639266
ChrI	22641306	22643620
ChrI	22644282	22646367
ChrI	22808410	22810260
ChrI	22810951	22811454
ChrI	22812288	22813852
ChrI	22814861	22816124
ChrI	22817567	22820442
ChrI	22821342	22823571
ChrI	22867986	22868682
ChrI	22951421	22954144
ChrI	22972723	22978708
ChrI	22979496	22979668
ChrI	23026943	23031336
ChrI	23043337	23045432
ChrI	23046348	23054227
ChrI	23062623	23089509
ChrI	23104179	23119257
ChrI	23119934	23123960
ChrI	23125944	23126350
ChrI	23127575	23137689
ChrI	23173823	23174143
ChrI	23184634	23185087
ChrI	23205976	23210384
ChrI	23211344	23213943
ChrI	23263592	23265375
ChrI	23266189	23266888
ChrI	23267664	23270309
ChrI	23288064	23290085
ChrI	23290838	23312674
ChrI	23317477	23319724
ChrI	23321104	23321571
ChrI	23322241	23323320
ChrI	23327144	23332446
ChrI	23340104	23343792
ChrI	23344490	23361544
ChrI	23363212	23363566
ChrI	23365694	23389940
ChrI	23391567	23393408
ChrI	23422779	23440683
ChrI	23442768	23444627
ChrI	23446946	23447904
ChrI	23464201	23482841
ChrI	23483569	23524274
ChrI	23525426	23532654
ChrI	23533848	23547895
ChrI	23549609	23549951
ChrI	23583821	23583983
ChrI	23589607	23603080
ChrI	23659244	23661065
ChrI	23661932	23666947
ChrI	23706910	23708032
ChrI	23709135	23717347
ChrI	23723108	23736463
ChrI	23755020	23757489
ChrI	23759627	23760087
ChrI	23825722	23865779
ChrI	23910647	23914264
ChrI	24090924	24091359
ChrI	24135939	24137277
ChrI	24137896	24141804
ChrI	24208927	24217960
ChrI	24218750	24229524
ChrI	24231666	24232010
ChrI	24235189	24241958
ChrI	24243531	24244436
ChrI	24245222	24247393
ChrI	24248361	24250119
ChrI	24250874	24251232
ChrI	24271901	24289398
ChrI	24290429	24297018
ChrI	24297898	24331676
ChrI	24334171	24335012
ChrI	24338270	24339986
ChrI	24341023	24343051
ChrI	24392248	24393514
ChrI	24434196	24435106
ChrI	24555219	24555473
ChrI	24626590	24630816
ChrI	24631443	24636150
ChrI	24636807	24637045
ChrI	24638506	24644993
ChrI	24653339	24654311
ChrI	24705733	24709320
ChrI	24710159	24722128
ChrI	24722871	24727543
ChrI	24729449	24755768
ChrI	24797989	24800789
ChrI	24817274	24819394
ChrI	24820666	24821306
ChrI	24822049	24822705
ChrI	24823407	24826567
ChrI	24828379	24828613
ChrI	24829948	24830765
ChrI	24831508	24832674
ChrI	24835018	24837661
ChrI	24839117	24855058
ChrI	24872316	24872514
ChrI	24932924	24934951
ChrI	24944140	24953342
ChrI	24956375	24957905
ChrI	24960566	24961703
ChrI	24968636	24984124
ChrI	25032708	25035253
ChrI	25160744	25166510
ChrI	25235350	25236275
ChrI	25237001	25243699
ChrI	25261539	25270144
ChrI	25383129	25383314
ChrI	25384482	25387573
ChrI	25388271	25389870
ChrI	25390620	25391671
ChrI	25397942	25398123
ChrI	25399130	25399366
ChrI	25468497	25470279
ChrI	25470915	25479084
ChrI	25479863	25488152
ChrI	25522256	25523828
ChrI	25524762	25529985
ChrI	25580348	25581523
ChrI	25632464	25637656
ChrI	25714923	25726253
ChrI	25727087	25728691
ChrI	25729514	25742944
ChrI	25743610	25747113
ChrI	25886536	25892743
ChrI	25893359	25903739
ChrI	25904445	25908465
ChrI	25909579	25926096
ChrI	25930860	25932029
ChrI	25946418	25950680
ChrI	25955350	25955563
ChrI	25969305	25971931
ChrI	26094700	26101415
ChrI	26102238	26106127
ChrI	26107319	26108025
ChrI	26117307	26118823
ChrI	26119551	26123744
ChrI	26166250	26169465
ChrI	26170213	26179269
ChrI	26180332	26187428
ChrI	26188401	26188999
ChrI	26199879	26218484
ChrI	26219197	26220111
ChrI	26227289	26247951
ChrI	26248579	26250759
ChrI	26255318	26258502
ChrI	26267239	26268353
ChrI	26269675	26274455
ChrI	26280548	26282548
ChrI	26283277	26289072
ChrI	26289824	26292006
ChrI	26295055	26295552
ChrI	26354719	26357114
ChrI	26360759	26364169
ChrI	26390432	26393474
ChrI	26394684	26401226
ChrI	26424336	26424946
ChrI	26435505	26436730
ChrI	26437354	26438798
ChrI	26465119	26466138
ChrI	26471181	26479730
ChrI	26483556	26491520
ChrI	26493362	26502658
ChrI	26512987	26518908
ChrI	26523823	26524684
ChrI	26525309	26530272
ChrI	26532698	26533639
ChrI	26538731	26539658
ChrI	26555863	26557737
ChrI	26558401	26559486
ChrI	26564475	26567870
ChrI	26675979	26677511
ChrI	26687048	26699429
ChrI	26700518	26726518
ChrI	26727376	26736165
ChrI	26739935	26740117
ChrI	26749468	26749866
ChrI	26750937	26752122
ChrI	26761339	26764024
ChrI	26765547	26767292
ChrI	26768101	26768630
ChrI	26769447	26769729
ChrI	26777899	26780282
ChrI	26781564	26787878
ChrI	26810079	26812889
ChrI	26822236	26840924
ChrI	26846422	26846603
ChrI	26851555	26855981
ChrI	26857844	26864223
ChrI	26868466	26870936
ChrI	26873260	26875875
ChrI	26886559	26886849
ChrI	26889858	26893607
ChrI	26895108	26896116
ChrI	26896737	26902208
ChrI	26903985	26905202
ChrI	26905941	26911095
ChrI	26915460	26923616
ChrI	26924678	26929534
ChrI	26930767	26932153
ChrI	26932780	26934818
ChrI	26942500	26947486
ChrI	26948353	26953866
ChrI	26955202	26958063
ChrI	26979386	26984942
ChrI	26988133	26989724
ChrI	26993389	26995665
ChrI	26996670	26997643
ChrI	27003076	27003715
ChrI	27004335	27006165
ChrI	27008145	27009391
ChrI	27013068	27013289
ChrI	27022909	27024206
ChrI	27030872	27033225
ChrI	27050622	27063929
ChrI	27064609	27073226
ChrI	27077611	27077873
ChrI	27084128	27090272
ChrI	27091764	27092226
ChrI	27092903	27096517
ChrI	27097677	27103967
ChrI	27105195	27108553
ChrI	27114270	27115955
ChrI	27119874	27121537
ChrI	27126784	27136611
ChrI	27145497	27162071
ChrI	27162963	27166261
ChrI	27172422	27173267
ChrI	27174330	27182707
ChrI	27183906	27186184
ChrI	27189757	27190597
ChrI	27191215	27193736
ChrI	27194735	27197103
ChrI	27197999	27198332
ChrI	27201366	27201779
ChrI	27202453	27204971
ChrI	27206290	27208556
ChrI	27210458	27211067
ChrI	27213091	27214022
ChrI	27221407	27230010
ChrI	27230728	27236598
ChrI	27239714	27240475
ChrI	27261818	27268358
ChrI	27302664	27305790
ChrI	27307731	27310168
ChrI	27314169	27314368
ChrI	27324388	27325054
ChrI	27325778	27326016
ChrI	27328801	27329109
ChrI	27410645	27414145
ChrI	27414985	27417783
ChrI	27424416	27426107
ChrI	27427991	27430549
ChrI	27463593	27472913
ChrI	27530495	27533918
ChrI	27538041	27539288
ChrI	27540104	27541742
ChrI	27550985	27558707
ChrI	27560003	27560606
ChrI	27562961	27564557
ChrI	27565662	27567663
ChrI	27575229	27583776
ChrI	27584416	27585793
ChrI	27587600	27607415
ChrI	27609063	27621050
ChrI	27677346	27691586
ChrI	27709225	27715358
ChrI	27715976	27722087
ChrI	27724614	27726433
ChrI	27727268	27732762
ChrI	27733390	27735472
ChrI	27736087	27737580
ChrI	27743751	27749139
ChrI	27755040	27760886
ChrI	27761506	27763030
ChrI	27763975	27785731
ChrI	27786451	27786913
ChrI	27789329	27791317
ChrI	27798376	27801724
ChrI	27803069	27822219
ChrI	27826704	27835174
ChrI	27844572	27844788
ChrI	27847627	27848127
ChrI	27865322	27877412
ChrI	27886802	27898606
ChrI	27899353	27905287
ChrI	27905903	27926027
ChrI	27929255	27962061
ChrI	27962749	27963709
ChrI	27964764	27968770
ChrI	27972660	27972931
ChrI	28009208	28010509
ChrI	28011258	28014758
ChrI	28016821	28018362
ChrI	28019503	28021216
ChrI	28033791	28037912
ChrI	28039081	28046540
ChrI	28053220	28055227
ChrI	28058243	28069430
ChrI	28070103	28080324
ChrI	28080960	28086796
ChrI	28088522	28090748
ChrI	28093735	28117007
ChrI	28117690	28135081
ChrI	28135851	28157156
ChrI	28159548	28167716
ChrI	28174765	28177113
ChrI	28177912	28185521
ChrI	28189586	28190303
ChrI	28275915	28276568
ChrI	28281910	28287724
ChrI	28293163	28293686
ChrI	28312831	28314761
ChrI	28318441	28326129
ChrI	28329820	28331789
ChrI	28332559	28336010
ChrI	28338078	28340204
ChrI	28450469	28483136
ChrI	28488901	28490067
ChrI	28491219	28498554
ChrI	28499586	28502091
ChrI	28504798	28518260
ChrI	28519137	28528521
ChrI	28529477	28534557
ChrI	28535521	28550576
ChrI	28560819	28561632
ChrI	28563039	28568853
ChrI	28570005	28574243
ChrI	28578176	28587358
ChrI	28588099	28588692
ChrI	28627888	28629895
ChrI	28643012	28644343
ChrI	28652619	28654943
ChrI	28655629	28680636
ChrI	28683353	28685062
ChrI	28686836	28688390
ChrI	28696128	28700388
ChrI	28710806	28723062
ChrI	28725822	28727469
ChrI	28751897	28752748
ChrI	28800217	28801032
ChrI	28805584	28810241
ChrI	28810866	28812738
ChrI	28861606	28862010
ChrI	28863149	28863319
ChrI	28877129	28881100
ChrI	28953287	28954221
ChrI	28954926	28955479
ChrI	28956139	28959258
ChrI	28961220	28962213
ChrI	29019853	29020203
ChrI	29030004	29039069
ChrI	29042777	29048791
ChrI	29050928	29052193
ChrI	29052976	29053413
ChrI	29061640	29063020
ChrI	29065016	29065319
ChrI	29067023	29074887
ChrI	29117134	29129357
ChrI	29130129	29131071
ChrI	29157376	29159526
ChrI	29160663	29165254
ChrI	29167315	29175098
ChrI	29180259	29192929
ChrI	29195944	29196475
ChrI	29199837	29202770
ChrI	29220684	29221125
ChrI	29239946	29242941
ChrI	29276396	29288010
ChrI	29288997	29300457
ChrI	29329033	29330347
ChrI	29331812	29332735
ChrI	29335046	29335625
ChrI	29389176	29398795
ChrI	29399578	29400595
ChrI	29402417	29403068
ChrI	29405950	29409900
ChrI	29412506	29412956
ChrI	29413933	29417871
ChrI	29420570	29424402
ChrI	29425519	29426447
ChrI	29427116	29427814
ChrI	29428594	29429197
ChrI	29431842	29432328
ChrI	29433877	29437899
ChrI	29438743	29439171
ChrI	29442229	29442798
ChrI	29444442	29453226
ChrI	29454395	29459492
ChrI	29460511	29465963
ChrI	29472842	29473389
ChrI	29476585	29488503
ChrI	29490942	29501832
ChrI	29502658	29505769
ChrI	29509460	29510141
ChrI	29512787	29513806
ChrI	29514434	29517883
ChrI	29523071	29524783
ChrI	29525724	29544181
ChrI	29559076	29559520
ChrI	29568474	29573553
ChrI	29574994	29577321
ChrI	29579429	29580387
ChrI	29582595	29591197
ChrI	29605160	29606786
ChrI	29656698	29660276
ChrI	29660941	29663919
ChrI	29668127	29671533
ChrI	29672894	29677981
ChrI	29681137	29685939
ChrI	29686671	29693594
ChrI	29704987	29706703
ChrI	29707319	29708637
ChrI	29714061	29715248
ChrI	29722563	29723302
ChrI	29735886	29740794
ChrI	29741430	29743608
ChrI	29758233	29767996
ChrI	29768854	29771062
ChrI	29772016	29774280
ChrI	29786609	29797554
ChrI	29846654	29851045
ChrI	29855521	29860489
ChrI	29862394	29862704
ChrI	29863377	29867476
ChrI	29868290	29868824
ChrI	29875651	29881801
ChrI	29882556	29904587
ChrI	29905575	29920883
ChrI	29921877	29923271
ChrI	29925247	29926359
ChrI	29934268	29939505
ChrI	29941138	29944138
ChrI	29946158	29948469
ChrI	29950363	29954573
ChrI	29985911	29988250
ChrI	30000519	30001117
ChrI	30001806	30004068
ChrI	30004697	30007082
ChrI	30024725	30029197
ChrI	30030820	30035864
ChrI	30052478	30062074
ChrI	30065488	30065994
ChrI	30067485	30068600
ChrI	30104140	30104782
ChrI	30105432	30106357
ChrI	30111253	30111856
ChrI	30112683	30113435
ChrI	30115239	30115848
ChrI	30119716	30120757
ChrI	30124111	30125169
ChrI	30126790	30128461
ChrI	30129581	30137908
ChrI	30140285	30141363
ChrI	30153880	30175654
ChrI	30180545	30181715
ChrI	30193511	30200633
ChrI	30202640	30204729
ChrI	30205676	30210670
ChrI	30212720	30215325
ChrI	30216070	30218569
ChrI	30221469	30222492
ChrI	30224762	30228225
ChrI	30230430	30236348
ChrI	30237020	30254417
ChrI	30259039	30259749
ChrI	30262206	30263893
ChrI	30268652	30269114
ChrI	30270713	30281173
ChrI	30282724	30300587
ChrI	30304685	30331204
ChrI	30334503	30334707
ChrI	30335611	30338234
ChrI	30338906	30339558
ChrI	30340234	30342604
ChrI	30343393	30346654
ChrI	30347536	30348767
ChrI	30349496	30352355
ChrI	30353120	30353517
ChrI	30361681	30362066
ChrI	30370422	30370739
ChrI	30371971	30372124
ChrI	30373221	30377811
ChrI	30378460	30383580
ChrI	30384318	30386770
ChrI	30387578	30388164
ChrI	30389496	30389696
ChrI	30390376	30391946
ChrI	30393778	30396383
ChrI	30397167	30399444
ChrI	30401474	30412314
ChrI	30420383	30421077
ChrI	30424123	30424777
ChrI	30426860	30427946
ChrI	30431772	30432820
ChrI	30448802	30449013
ChrI	30459120	30459737
ChrI	30465948	30466514
ChrI	30470203	30472161
ChrI	30474924	30476493
ChrI	30477432	30477855
ChrI	30510557	30511129
ChrI	30516727	30519245
ChrI	30520000	30524610
ChrI	30526408	30527086
ChrI	30532830	30534896
ChrI	30535785	30537199
ChrI	30538127	30540854
ChrI	30566404	30568293
ChrI	30571746	30575901
ChrI	30597306	30598197
ChrI	30599390	30600269
ChrI	30605103	30608718
ChrI	30609834	30614175
ChrI	30615167	30617335
ChrI	30618190	30623212
ChrI	30623890	30633280
ChrI	30646808	30652850
ChrI	30664136	30665859
ChrI	30666677	30673469
ChrI	30674995	30679228
ChrI	30680733	30681229
ChrI	30682215	30682856
ChrI	30687160	30687429
ChrI	30701050	30702102
ChrI	30702715	30709983
ChrI	30711614	30713109
ChrI	30713775	30715616
ChrI	30716780	30732096
ChrI	30733580	30734756
ChrI	30736250	30736617
ChrI	30744405	30744697
ChrI	30764893	30769891
ChrI	30770687	30773662
ChrI	30780884	30782130
ChrI	30784453	30790697
ChrI	30791363	30795052
ChrI	30796129	30799764
ChrI	30801453	30802146
ChrI	30820708	30827790
ChrI	30835483	30836182
ChrI	30848573	30852089
ChrI	30858736	30873336
ChrI	30874285	30875913
ChrI	30876544	30879039
ChrI	30881429	30881714
ChrI	30883492	30883989
ChrI	30892246	30895502
ChrI	30900217	30911398
ChrI	30923138	30923371
ChrI	30928588	30928783
ChrI	30929404	30938036
ChrI	30939773	30943926
ChrI	30944588	30949021
ChrI	30953180	30954995
ChrI	30958203	30958482
ChrI	30962468	30963146
ChrI	30979190	30979564
ChrI	30986539	30995325
ChrI	30996067	30996321
ChrI	30997454	31006330
ChrI	31011369	31016002
ChrI	31021003	31021302
ChrI	31024385	31024910
ChrI	31035825	31037451
ChrI	31047371	31059414
ChrI	31060180	31063020
ChrI	31066449	31074631
ChrI	31075389	31080978
ChrI	31082626	31085178
ChrI	31085939	31088112
ChrI	31091717	31093556
ChrI	31108058	31113791
ChrI	31115137	31122178
ChrI	31124157	31126831
ChrI	31127840	31129065
ChrI	31134211	31139381
ChrI	31144174	31144437
ChrI	31145448	31153408
ChrI	31155476	31158868
ChrI	31163837	31164345
ChrI	31179511	31179880
ChrI	31192660	31192831
ChrI	31203286	31204422
ChrI	31205430	31206007
ChrI	31209289	31210447
ChrI	31214596	31215175
ChrI	31217450	31218081
ChrI	31220676	31221069
ChrI	31222350	31222960
ChrI	31256621	31262630
ChrI	31269775	31272069
ChrI	31272714	31277424
ChrI	31280115	31280799
ChrI	31283658	31286214
ChrI	31287498	31302282
ChrI	31302934	31303837
ChrI	31305012	31307262
ChrI	31310790	31316994
ChrI	31317720	31318156
[truncated: 7,651 more rows]

## Sheet: H3K27me3
Chr	start	stop
ChrI	236	4164
ChrI	5047	10939
ChrI	16177	16941
ChrI	17752	18162
ChrI	19301	21078
ChrI	40256	40638
ChrI	143810	144042
ChrI	162831	163273
ChrI	201077	201764
ChrI	204136	204880
ChrI	205865	206209
ChrI	207456	209273
ChrI	218080	218637
ChrI	274629	275908
ChrI	277913	278676
ChrI	312879	313777
ChrI	317597	318093
ChrI	318942	319501
ChrI	320995	321207
ChrI	322750	322973
ChrI	409080	410021
ChrI	441529	444267
ChrI	450116	450959
ChrI	453499	456894
ChrI	458763	460736
ChrI	461574	462510
ChrI	463482	468446
ChrI	469362	472171
ChrI	473597	474072
ChrI	475055	485089
ChrI	485882	487091
ChrI	487978	488453
ChrI	489498	491054
ChrI	492466	494144
ChrI	494963	496164
ChrI	498837	505739
ChrI	506475	507914
ChrI	512058	512748
ChrI	515319	516325
ChrI	536284	536759
ChrI	589688	590527
ChrI	597168	597842
ChrI	602535	603843
ChrI	608006	608709
ChrI	609760	612724
ChrI	769741	771040
ChrI	771906	772193
ChrI	778167	780047
ChrI	790147	790933
ChrI	797293	798418
ChrI	799588	800370
ChrI	803334	803763
ChrI	832509	832931
ChrI	835236	835733
ChrI	847296	849518
ChrI	853930	854419
ChrI	866235	867434
ChrI	872440	872937
ChrI	883745	884037
ChrI	885070	885501
ChrI	888831	890519
ChrI	891941	892273
ChrI	893012	894565
ChrI	896002	896456
ChrI	898073	898837
ChrI	905403	906188
ChrI	909183	910357
ChrI	913703	917234
ChrI	918875	920458
ChrI	921559	923150
ChrI	924222	925651
ChrI	927981	931368
ChrI	932792	934361
ChrI	935081	940673
ChrI	941495	947241
ChrI	949706	949901
ChrI	950879	951492
ChrI	953347	956332
ChrI	957293	960519
ChrI	961522	962956
ChrI	965346	966071
ChrI	967445	968459
ChrI	971955	972889
ChrI	973766	974302
ChrI	978630	979051
ChrI	980346	981583
ChrI	983219	984427
ChrI	985265	986492
ChrI	987535	988756
ChrI	989707	998524
ChrI	999387	1003042
ChrI	1003855	1006581
ChrI	1007640	1008446
ChrI	1010984	1013447
ChrI	1015658	1017174
ChrI	1017955	1019388
ChrI	1020307	1021597
ChrI	1022942	1023965
ChrI	1024922	1025287
ChrI	1026123	1026577
ChrI	1028321	1028562
ChrI	1029652	1030655
ChrI	1031890	1032476
ChrI	1033589	1034777
ChrI	1041176	1048771
ChrI	1050736	1053709
ChrI	1054824	1055222
ChrI	1062095	1063202
ChrI	1064700	1065169
ChrI	1067240	1067785
ChrI	1071000	1071810
ChrI	1074412	1075251
ChrI	1084862	1086153
ChrI	1086922	1087547
ChrI	1094632	1094990
ChrI	1095953	1096854
ChrI	1098752	1100535
ChrI	1102280	1106968
ChrI	1111369	1114059
ChrI	1114779	1118200
ChrI	1119333	1120273
ChrI	1121611	1122322
ChrI	1123626	1125078
ChrI	1128167	1130908
ChrI	1134471	1135016
ChrI	1135932	1138242
ChrI	1141181	1143953
ChrI	1144717	1146293
ChrI	1147507	1147748
ChrI	1148778	1153433
ChrI	1154229	1160929
ChrI	1162200	1163283
ChrI	1166710	1167625
ChrI	1169381	1171573
ChrI	1174538	1175404
ChrI	1176228	1179579
ChrI	1180429	1183329
ChrI	1186047	1186985
ChrI	1189054	1191592
ChrI	1192563	1196016
ChrI	1196938	1197179
ChrI	1200833	1201111
ChrI	1214115	1215619
ChrI	1232162	1232374
ChrI	1234527	1235008
ChrI	1305524	1308004
ChrI	1322911	1330955
ChrI	1331677	1336002
ChrI	1337453	1338296
ChrI	1340231	1340542
ChrI	1341511	1342132
ChrI	1343545	1345907
ChrI	1347529	1351220
ChrI	1351992	1354700
ChrI	1359387	1360493
ChrI	1361461	1365066
ChrI	1366234	1366590
ChrI	1368531	1369480
ChrI	1370221	1379739
ChrI	1383745	1392876
ChrI	1393884	1403773
ChrI	1405146	1406050
ChrI	1406825	1408094
ChrI	1409099	1412082
ChrI	1412857	1419449
ChrI	1420250	1421595
ChrI	1424352	1429876
ChrI	1430854	1432240
ChrI	1434185	1436457
ChrI	1437286	1437690
ChrI	1438717	1439415
ChrI	1440252	1441304
ChrI	1446921	1447923
ChrI	1448961	1449712
ChrI	1451431	1451678
ChrI	1471854	1472784
ChrI	1473656	1475183
ChrI	1476467	1476859
ChrI	1477586	1487313
ChrI	1488188	1489543
ChrI	1490250	1492115
ChrI	1493284	1493787
ChrI	1495612	1496608
ChrI	1497348	1497733
ChrI	1499497	1505037
ChrI	1506117	1512558
ChrI	1513338	1518603
ChrI	1520402	1526677
ChrI	1527407	1531860
ChrI	1534349	1537134
ChrI	1540225	1540535
ChrI	1542819	1546278
ChrI	1547061	1547298
ChrI	1548461	1551357
ChrI	1552522	1552911
ChrI	1553705	1560570
ChrI	1561447	1564977
ChrI	1565821	1566242
ChrI	1566933	1569201
ChrI	1570305	1571011
ChrI	1578126	1584146
ChrI	1585254	1592204
ChrI	1592938	1593830
ChrI	1595133	1595793
ChrI	1596603	1599452
ChrI	1605290	1607434
ChrI	1609923	1621451
ChrI	1622235	1626201
ChrI	1627503	1629046
ChrI	1630714	1633055
ChrI	1638146	1641831
ChrI	1642662	1643450
ChrI	1647750	1648408
ChrI	1650240	1650802
ChrI	1655233	1657282
ChrI	1661410	1662069
ChrI	1663928	1669740
ChrI	1670619	1675920
ChrI	1676713	1683509
ChrI	1684329	1691897
ChrI	1692706	1697021
ChrI	1698088	1699493
ChrI	1700962	1702034
ChrI	1703214	1705549
ChrI	1708293	1708507
ChrI	1712181	1713356
ChrI	1714176	1717259
ChrI	1719042	1720254
ChrI	1721630	1722083
ChrI	1722851	1724683
ChrI	1726304	1730512
ChrI	1733026	1733962
ChrI	1737337	1739426
ChrI	1740926	1742021
ChrI	1742961	1744132
ChrI	1746613	1747877
ChrI	1749632	1753867
ChrI	1755032	1758695
ChrI	1759553	1762739
ChrI	1764064	1765596
ChrI	1766769	1768487
ChrI	1770669	1771567
ChrI	1772779	1775027
ChrI	1776129	1779138
ChrI	1781275	1782198
ChrI	1784466	1786112
ChrI	1788149	1789395
ChrI	1794115	1797103
ChrI	1797970	1798740
ChrI	1884502	1884896
ChrI	1885985	1886664
ChrI	1890147	1890464
ChrI	1897019	1897547
ChrI	1900113	1900332
ChrI	1901235	1903739
ChrI	1909600	1910449
ChrI	1911874	1915495
ChrI	1917096	1918007
ChrI	1919034	1919869
ChrI	1921439	1921669
ChrI	1924564	1926962
ChrI	1928577	1929798
ChrI	1935212	1937626
ChrI	1941850	1942187
ChrI	1944095	1944461
ChrI	1962076	1962384
ChrI	1964514	1965260
ChrI	1970018	1970781
ChrI	1975141	1978173
ChrI	1980348	1980643
ChrI	1982176	1982626
ChrI	1983881	1985973
ChrI	2071971	2072177
ChrI	2073088	2074989
ChrI	2077615	2078341
ChrI	2127118	2127810
ChrI	2203125	2203348
ChrI	2212784	2213459
ChrI	2219330	2220076
ChrI	2224055	2225773
ChrI	2226529	2229090
ChrI	2232245	2232738
ChrI	2234333	2235824
ChrI	2241578	2242218
ChrI	2250216	2251806
ChrI	2263746	2264585
ChrI	2307497	2308155
ChrI	2327621	2330729
ChrI	2332557	2332884
ChrI	2333874	2334626
ChrI	2335485	2338611
ChrI	2340551	2342551
ChrI	2343246	2343733
ChrI	2344513	2345100
ChrI	2346088	2346532
ChrI	2350007	2350238
ChrI	2350939	2352935
ChrI	2354563	2355824
ChrI	2356657	2356882
ChrI	2366885	2367118
ChrI	2368261	2369052
ChrI	2370102	2373209
ChrI	2374153	2375486
ChrI	2376704	2379734
ChrI	2380599	2381802
ChrI	2384539	2388226
ChrI	2389492	2391355
ChrI	2393493	2393965
ChrI	2398291	2398743
ChrI	2399683	2401161
ChrI	2401855	2403649
ChrI	2408248	2409965
ChrI	2410740	2413012
ChrI	2415416	2415725
ChrI	2416908	2417622
ChrI	2421315	2421606
ChrI	2422420	2422980
ChrI	2432854	2435132
ChrI	2435926	2437043
ChrI	2439082	2441666
ChrI	2509745	2510881
ChrI	2512730	2513615
ChrI	2517128	2517351
ChrI	2533657	2534113
ChrI	2537884	2538599
ChrI	2543375	2545610
ChrI	2546739	2547701
ChrI	2548391	2549584
ChrI	2556105	2557426
ChrI	2558183	2558465
ChrI	2562415	2562963
ChrI	2563683	2564861
ChrI	2572038	2572753
ChrI	2573643	2575453
ChrI	2636488	2637262
ChrI	2639693	2641825
ChrI	2647025	2647898
ChrI	2658363	2659908
ChrI	2664382	2665524
ChrI	2666856	2670283
ChrI	2677100	2678040
ChrI	2725947	2727761
ChrI	2735094	2735471
ChrI	2748539	2751475
ChrI	2752305	2754461
ChrI	2755184	2759005
ChrI	2760361	2763214
ChrI	2764226	2765087
ChrI	2765875	2781571
ChrI	2784545	2788257
ChrI	2789057	2791575
ChrI	2792393	2793628
ChrI	2795202	2795790
ChrI	2801600	2802335
ChrI	2803025	2803971
ChrI	2804924	2806101
ChrI	2807389	2808654
ChrI	2810050	2811549
ChrI	2813381	2817607
ChrI	2818613	2819993
ChrI	2821397	2824204
ChrI	2825462	2826256
ChrI	2828355	2830886
ChrI	2831697	2832618
ChrI	2833430	2841016
ChrI	2842063	2843444
ChrI	2844136	2847898
ChrI	2849463	2850871
ChrI	2851562	2852082
ChrI	2852779	2856984
ChrI	2862370	2863744
ChrI	2864812	2865482
ChrI	2866653	2870521
ChrI	2871649	2873877
ChrI	2874582	2877660
ChrI	2878980	2880260
ChrI	2885318	2887588
ChrI	2894048	2902318
ChrI	2904025	2905219
ChrI	2907061	2908854
ChrI	2909616	2912576
ChrI	2916404	2917521
ChrI	2921531	2923005
ChrI	2925584	2928280
ChrI	2939410	2939616
ChrI	2956058	2956395
ChrI	2957457	2958062
ChrI	2958961	2959628
ChrI	2993560	2993765
ChrI	2995195	2995917
ChrI	2998490	2999773
ChrI	3014450	3015324
ChrI	3016754	3017916
ChrI	3031579	3031957
ChrI	3038903	3039771
ChrI	3042964	3043778
ChrI	3082686	3083575
ChrI	3084446	3085020
ChrI	3091773	3091974
ChrI	3093331	3094087
ChrI	3096588	3098013
ChrI	3103209	3104962
ChrI	3113175	3113464
ChrI	3123929	3124149
ChrI	3139023	3139256
ChrI	3140219	3140865
ChrI	3149378	3150073
ChrI	3175945	3177517
ChrI	3178229	3178883
ChrI	3184393	3185870
ChrI	3187836	3188987
ChrI	3189966	3190269
ChrI	3192712	3193376
ChrI	3197991	3198467
ChrI	3236319	3237370
ChrI	3248442	3249401
ChrI	3250334	3253714
ChrI	3254889	3257804
ChrI	3260500	3260782
ChrI	3261652	3262202
ChrI	3262989	3265616
ChrI	3266364	3267357
ChrI	3271423	3273025
ChrI	3273813	3278793
ChrI	3279727	3285709
ChrI	3293983	3299668
ChrI	3301306	3302074
ChrI	3306429	3307591
ChrI	3309602	3311351
ChrI	3315618	3316343
ChrI	3319374	3324963
ChrI	3325866	3329891
ChrI	3330795	3334048
ChrI	3335786	3337207
ChrI	3341514	3346463
ChrI	3347823	3349497
ChrI	3353840	3357890
ChrI	3358719	3359710
ChrI	3360452	3363364
ChrI	3364629	3368617
ChrI	3371981	3372469
ChrI	3374682	3376848
ChrI	3380059	3382791
ChrI	3383727	3384630
ChrI	3385327	3385530
ChrI	3386304	3387360
ChrI	3390038	3391899
ChrI	3392713	3395193
ChrI	3396020	3396318
ChrI	3397662	3399460
ChrI	3400259	3403638
ChrI	3410450	3411662
ChrI	3414762	3415142
ChrI	3416071	3416292
ChrI	3417842	3418327
ChrI	3420808	3421201
ChrI	3432792	3433463
ChrI	3457401	3457574
ChrI	3462265	3462491
ChrI	3463531	3464165
ChrI	3471210	3471597
ChrI	3503509	3505333
ChrI	3511515	3512840
ChrI	3514505	3515908
ChrI	3517037	3519583
ChrI	3520409	3520883
ChrI	3526815	3528276
ChrI	3529216	3530660
ChrI	3531933	3532702
ChrI	3538509	3541264
ChrI	3543457	3544946
ChrI	3548641	3549222
ChrI	3551309	3551946
ChrI	3555296	3556472
ChrI	3558593	3559436
ChrI	3561254	3563046
ChrI	3563992	3565508
ChrI	3567542	3569226
ChrI	3570170	3570957
ChrI	3572145	3572353
ChrI	3573355	3574610
ChrI	3577154	3578833
ChrI	3580705	3581452
ChrI	3584298	3586858
ChrI	3587899	3595001
ChrI	3596074	3596694
ChrI	3597398	3598515
ChrI	3599444	3600571
ChrI	3607393	3607695
ChrI	3641319	3641900
ChrI	3656676	3658545
ChrI	3662117	3663329
ChrI	3691221	3692554
ChrI	3700129	3700714
ChrI	3701743	3702499
ChrI	3703360	3704828
ChrI	3707059	3708687
ChrI	3712261	3712641
ChrI	3713584	3714230
ChrI	3715319	3717894
ChrI	3720809	3722557
ChrI	3732332	3732730
ChrI	3757807	3758446
ChrI	3759453	3761095
ChrI	3761825	3762130
ChrI	3764876	3767013
ChrI	3771060	3779795
ChrI	3780915	3782534
ChrI	3785107	3786616
ChrI	3788145	3789597
ChrI	3803516	3804208
ChrI	3805368	3807816
ChrI	3811730	3811958
ChrI	3813575	3813959
ChrI	3814739	3816419
ChrI	3817431	3818044
ChrI	3819424	3820061
ChrI	3821990	3823923
ChrI	3830714	3832276
ChrI	3833077	3834114
ChrI	3835488	3837954
ChrI	3838908	3841579
ChrI	3842853	3852967
ChrI	3853662	3856690
ChrI	3857432	3869076
ChrI	3869865	3881596
ChrI	3882728	3884213
ChrI	3884968	3886097
ChrI	3887195	3892835
ChrI	3894014	3896051
ChrI	3897120	3901857
ChrI	3902804	3903587
ChrI	3904813	3906400
ChrI	3909070	3910137
ChrI	3916664	3917287
ChrI	3918771	3921836
ChrI	3934037	3936071
ChrI	3936980	3937607
ChrI	3939964	3945256
ChrI	3946906	3947683
ChrI	3948466	3950698
ChrI	3953038	3954262
ChrI	3955577	3956322
ChrI	3959219	3961378
ChrI	3970381	3970826
ChrI	3975129	3975314
ChrI	3984105	3985607
ChrI	4012306	4013635
ChrI	4015739	4030814
ChrI	4031536	4040813
ChrI	4041580	4047912
ChrI	4048619	4049048
ChrI	4050035	4055121
ChrI	4055966	4056693
ChrI	4058035	4062184
ChrI	4064044	4064275
ChrI	4066832	4068260
ChrI	4069073	4071971
ChrI	4072702	4074491
ChrI	4075254	4080604
ChrI	4081405	4086887
ChrI	4088901	4089232
ChrI	4090326	4097616
ChrI	4100545	4100916
ChrI	4102540	4105774
ChrI	4106685	4111299
ChrI	4112080	4118524
ChrI	4119505	4123421
ChrI	4124736	4128666
ChrI	4129805	4130170
ChrI	4131213	4132466
ChrI	4133381	4136211
ChrI	4148244	4148653
ChrI	4160485	4162335
ChrI	4165292	4166068
ChrI	4168447	4168747
ChrI	4234972	4235246
ChrI	4236535	4237048
ChrI	4238491	4239266
ChrI	4241416	4241631
ChrI	4242378	4242719
ChrI	4243607	4248967
ChrI	4251428	4252336
ChrI	4253195	4255170
ChrI	4258121	4258421
ChrI	4261604	4262023
ChrI	4264199	4264854
ChrI	4268055	4268350
ChrI	4272121	4273336
ChrI	4275107	4277143
ChrI	4279877	4282711
ChrI	4283835	4284995
ChrI	4287561	4287809
ChrI	4290487	4291492
ChrI	4299216	4299422
ChrI	4410098	4410793
ChrI	4412645	4413532
ChrI	4415898	4418517
ChrI	4419691	4424003
ChrI	4426056	4426747
ChrI	4429068	4429295
ChrI	4430117	4430656
ChrI	4431664	4432122
ChrI	4433018	4435701
ChrI	4437503	4437839
ChrI	4439553	4440030
ChrI	4441795	4442933
ChrI	4445496	4446943
ChrI	4448101	4451495
ChrI	4453499	4453885
ChrI	4456158	4456982
ChrI	4458054	4460193
ChrI	4462138	4463642
ChrI	4467857	4469661
ChrI	4470751	4471495
ChrI	4473297	4476433
ChrI	4478211	4478509
ChrI	4486621	4486936
ChrI	4493425	4493800
ChrI	4497430	4498071
ChrI	4503337	4503994
ChrI	4511194	4511972
ChrI	4515063	4516508
ChrI	4517936	4518427
ChrI	4548477	4549593
ChrI	4599242	4599494
ChrI	4602261	4603561
ChrI	4604439	4605073
ChrI	4613485	4613836
ChrI	4717325	4718128
ChrI	4722869	4724827
ChrI	4726244	4727857
ChrI	4730954	4732783
ChrI	4734854	4736913
ChrI	4743288	4743900
ChrI	4745276	4746025
ChrI	4751431	4752231
ChrI	4755133	4755317
ChrI	4763553	4763740
ChrI	4765743	4767107
ChrI	4770443	4771895
ChrI	4773421	4774273
ChrI	4779404	4779960
ChrI	4782404	4783044
ChrI	4784240	4784630
ChrI	4809564	4809865
ChrI	4825792	4826723
ChrI	4838412	4838719
ChrI	4841333	4843089
ChrI	4853347	4853894
ChrI	4856430	4856790
ChrI	4858069	4860338
ChrI	4864737	4865466
ChrI	5047290	5054034
ChrI	5056107	5057949
ChrI	5065850	5066804
ChrI	5067714	5067901
ChrI	5069221	5069931
ChrI	5073493	5078746
ChrI	5083897	5084708
ChrI	5104985	5106666
ChrI	5107530	5108778
ChrI	5110533	5111935
ChrI	5112672	5112844
ChrI	5115408	5117437
ChrI	5118138	5119380
ChrI	5120080	5120868
ChrI	5122036	5124850
ChrI	5143124	5145606
ChrI	5146603	5147901
ChrI	5148714	5149084
ChrI	5150520	5151514
ChrI	5161709	5162885
ChrI	5166393	5167382
ChrI	5169391	5170124
ChrI	5171029	5172346
ChrI	5175293	5175634
ChrI	5177802	5178046
ChrI	5180492	5180893
ChrI	5182361	5183368
ChrI	5184519	5185106
ChrI	5196973	5198112
ChrI	5200741	5200918
ChrI	5203277	5204050
ChrI	5212555	5213601
ChrI	5253453	5254605
ChrI	5257545	5258234
ChrI	5260710	5261136
ChrI	5261927	5262669
ChrI	5263756	5274994
ChrI	5276114	5276304
ChrI	5387046	5389746
ChrI	5392073	5394088
ChrI	5398265	5398532
ChrI	5403134	5403912
ChrI	5405131	5405780
ChrI	5409038	5410019
ChrI	5418851	5421158
ChrI	5442100	5443219
ChrI	5444425	5445842
ChrI	5446851	5447892
ChrI	5450705	5454992
ChrI	5456124	5459550
ChrI	5461645	5462031
ChrI	5462993	5466255
ChrI	5498641	5498865
ChrI	5500796	5501554
ChrI	5502269	5502622
ChrI	5519415	5520112
ChrI	5530444	5530808
ChrI	5553667	5555563
ChrI	5556590	5557915
ChrI	5560807	5561639
ChrI	5562482	5564122
ChrI	5566886	5570022
ChrI	5579190	5580136
ChrI	5592151	5593204
ChrI	5602127	5602626
ChrI	5605733	5605980
ChrI	5606781	5607527
ChrI	5609930	5610733
ChrI	5611890	5613887
ChrI	5618028	5618351
ChrI	5621685	5622893
ChrI	5633282	5633677
ChrI	5635066	5635496
ChrI	5637445	5640924
ChrI	5642230	5643416
ChrI	5649900	5651794
ChrI	5652648	5654868
ChrI	5655583	5660275
ChrI	5661986	5663615
ChrI	5664484	5666905
ChrI	5668492	5672579
ChrI	5673664	5674109
ChrI	5676302	5679151
ChrI	5681176	5682962
ChrI	5684404	5686522
ChrI	5732177	5735997
ChrI	5736882	5737483
ChrI	5756505	5757421
ChrI	5759466	5760136
ChrI	5768138	5769913
ChrI	5784582	5786136
ChrI	5796745	5796981
ChrI	5797956	5799375
ChrI	5802820	5806079
ChrI	5809104	5809413
ChrI	5810266	5811292
ChrI	5813716	5814373
ChrI	5815406	5816085
ChrI	5816939	5817153
ChrI	5819713	5820781
ChrI	5822159	5822772
ChrI	5841861	5844289
ChrI	5845881	5847938
ChrI	5848834	5849804
ChrI	5852988	5855060
ChrI	5856550	5867750
ChrI	5874664	5875651
ChrI	5880285	5880547
ChrI	5882012	5886095
ChrI	5891657	5892589
ChrI	5894641	5895819
ChrI	5908903	5909871
ChrI	5915410	5916665
ChrI	5917875	5921838
ChrI	5922538	5925072
ChrI	5926808	5927948
ChrI	5929357	5930396
ChrI	5932397	5932911
ChrI	5936827	5937527
ChrI	5938863	5939478
ChrI	5940416	5941673
ChrI	5944149	5948607
ChrI	5952290	5952543
ChrI	5959550	5959957
ChrI	5960746	5961067
ChrI	5969257	5970264
ChrI	5974829	5976220
ChrI	5979042	5979833
ChrI	5981827	5982163
ChrI	6009297	6009857
ChrI	6014493	6015288
ChrI	6016233	6017854
ChrI	6018777	6019156
ChrI	6023037	6026997
ChrI	6028382	6028816
ChrI	6029811	6030682
ChrI	6033502	6034219
ChrI	6035898	6037394
ChrI	6046345	6046841
ChrI	6048121	6048528
ChrI	6051078	6053397
ChrI	6054782	6055307
ChrI	6077775	6080697
ChrI	6084436	6085231
ChrI	6086020	6087575
ChrI	6091476	6092634
ChrI	6093428	6094979
ChrI	6095682	6100089
ChrI	6101498	6103572
ChrI	6106458	6106918
ChrI	6108150	6109244
ChrI	6110300	6114081
ChrI	6114780	6116546
ChrI	6118510	6119942
ChrI	6120736	6121559
ChrI	6124063	6124506
ChrI	6125522	6127262
ChrI	6128294	6132814
ChrI	6134393	6137237
ChrI	6138500	6140120
ChrI	6141118	6143787
ChrI	6144479	6145745
ChrI	6146559	6146859
ChrI	6148469	6154662
ChrI	6155498	6157158
ChrI	6158774	6160008
ChrI	6162235	6164206
ChrI	6166400	6172156
ChrI	6172856	6173968
ChrI	6175355	6179377
ChrI	6180104	6180320
ChrI	6181758	6182843
ChrI	6184101	6185405
ChrI	6186146	6186717
ChrI	6188875	6191658
ChrI	6193111	6193978
ChrI	6194681	6198139
ChrI	6201852	6204245
ChrI	6205004	6208764
ChrI	6209494	6210010
ChrI	6246646	6247882
ChrI	6251614	6252688
ChrI	6253736	6254130
ChrI	6256699	6257036
ChrI	6258107	6258495
ChrI	6260635	6261771
ChrI	6262730	6263206
ChrI	6265617	6266590
ChrI	6269000	6269278
ChrI	6271849	6274303
ChrI	6275271	6275878
ChrI	6276938	6278814
ChrI	6280264	6281679
ChrI	6282388	6284035
ChrI	6284856	6285747
ChrI	6291387	6291789
ChrI	6324596	6324782
ChrI	6342432	6342916
ChrI	6360109	6360404
ChrI	6432796	6433618
ChrI	6434999	6436915
ChrI	6437688	6442137
ChrI	6445960	6446146
ChrI	6454080	6455699
ChrI	6462717	6463865
ChrI	6466808	6467970
ChrI	6468688	6468905
ChrI	6472628	6478038
ChrI	6479678	6486703
ChrI	6487545	6492194
ChrI	6495272	6497265
ChrI	6499328	6504004
ChrI	6512562	6520902
ChrI	6521837	6524852
ChrI	6525682	6536715
ChrI	6541743	6541930
ChrI	6542636	6547078
ChrI	6547828	6550314
ChrI	6552239	6553479
ChrI	6554377	6557852
ChrI	6559210	6560075
ChrI	6561411	6563111
ChrI	6564396	6566269
ChrI	6567188	6568085
ChrI	6571131	6571813
ChrI	6573005	6575196
ChrI	6575905	6576514
ChrI	6595419	6597921
ChrI	6599823	6600779
ChrI	6601504	6602640
ChrI	6603515	6614421
ChrI	6615190	6622843
ChrI	6623565	6626800
ChrI	6628534	6629459
ChrI	6630204	6639024
ChrI	6640048	6644914
ChrI	6645788	6649758
ChrI	6655615	6662288
ChrI	6664260	6667553
ChrI	6668483	6671994
ChrI	6672790	6675332
ChrI	6676120	6678582
ChrI	6680549	6684510
ChrI	6685295	6686783
ChrI	6687605	6690385
ChrI	6691163	6695336
ChrI	6696394	6696795
ChrI	6697689	6700319
ChrI	6713709	6714577
ChrI	6715935	6722769
ChrI	6723544	6724089
ChrI	6725589	6726764
ChrI	6729435	6732159
ChrI	6732988	6735602
ChrI	6737258	6740158
ChrI	6751174	6752683
ChrI	6756388	6757531
ChrI	6758392	6759094
ChrI	6760328	6760902
ChrI	6791815	6793172
ChrI	6796971	6798597
ChrI	6799328	6800971
ChrI	6802194	6805409
ChrI	6806550	6813815
ChrI	6814601	6815211
ChrI	6816441	6816734
ChrI	6817603	6818103
ChrI	6818886	6820743
ChrI	6822161	6825909
ChrI	6826615	6828146
ChrI	6830424	6832256
ChrI	6833298	6834314
ChrI	6836599	6837892
ChrI	6839252	6841862
ChrI	6844729	6846283
ChrI	6848006	6848629
ChrI	6853186	6853376
ChrI	6859159	6859443
ChrI	6860338	6860613
ChrI	6862574	6863451
ChrI	6865738	6866662
ChrI	6867621	6868484
ChrI	6870292	6870874
ChrI	6871808	6872487
ChrI	6873290	6873775
ChrI	6875761	6877740
ChrI	6882380	6882860
ChrI	6883895	6884343
ChrI	6885276	6887858
ChrI	6889157	6889976
ChrI	6891143	6891843
ChrI	6893572	6894029
ChrI	6898173	6898374
ChrI	6900036	6900688
ChrI	6911073	6914508
ChrI	6916079	6917119
ChrI	6918506	6919729
ChrI	6920787	6923771
ChrI	6924579	6926741
ChrI	6927487	6932453
ChrI	6934251	6937691
ChrI	6938744	6939247
ChrI	6940322	6940601
ChrI	6941600	6942867
ChrI	6944900	6945226
ChrI	6947428	6947733
ChrI	6949654	6956276
ChrI	6959507	6960399
ChrI	6961414	6962421
ChrI	6963392	6964236
ChrI	6965319	6967506
ChrI	6972008	6973642
ChrI	6975429	6975641
ChrI	6982207	6983758
ChrI	6984461	6985740
ChrI	7036075	7037478
ChrI	7038480	7039809
ChrI	7040731	7041282
ChrI	7043656	7044859
ChrI	7046676	7049308
ChrI	7050404	7051044
ChrI	7052957	7055378
ChrI	7056279	7058383
ChrI	7067603	7068745
ChrI	7069492	7070050
ChrI	7070988	7071851
ChrI	7072748	7076841
ChrI	7077618	7078281
ChrI	7081616	7085686
ChrI	7086437	7088129
ChrI	7089338	7091306
ChrI	7095454	7100341
ChrI	7101424	7112880
ChrI	7116096	7117496
ChrI	7128571	7129474
ChrI	7130233	7130632
ChrI	7185083	7185423
ChrI	7196361	7197909
ChrI	7213364	7214725
ChrI	7223167	7223392
ChrI	7260831	7261237
ChrI	7300543	7301171
ChrI	7305491	7307489
ChrI	7309630	7310832
ChrI	7314490	7315562
ChrI	7325893	7326555
ChrI	7327670	7329840
ChrI	7336821	7337877
ChrI	7339297	7341066
ChrI	7348329	7348712
ChrI	7349527	7350139
ChrI	7350874	7353161
ChrI	7355197	7355986
ChrI	7360853	7363049
ChrI	7364251	7366688
ChrI	7367456	7368189
ChrI	7369515	7371459
ChrI	7375283	7375804
ChrI	7378638	7379155
ChrI	7380027	7380389
ChrI	7383447	7387337
ChrI	7388285	7388722
ChrI	7392554	7393368
ChrI	7425040	7425726
ChrI	7427128	7427937
ChrI	7431480	7435209
ChrI	7436023	7440113
ChrI	7441543	7442165
ChrI	7442981	7444305
ChrI	7445587	7445814
ChrI	7489450	7490066
ChrI	7491169	7491360
ChrI	7492505	7493067
ChrI	7493929	7494594
ChrI	7496239	7503886
ChrI	7505966	7507290
ChrI	7510930	7512220
ChrI	7513906	7514926
ChrI	7520439	7520638
ChrI	7644284	7648543
ChrI	7649405	7650216
ChrI	7650925	7652943
ChrI	7702804	7703630
ChrI	7708978	7710980
ChrI	7712280	7712818
ChrI	7715495	7717097
ChrI	7717987	7719387
ChrI	7720333	7720628
ChrI	7736542	7737472
ChrI	7738944	7739635
ChrI	7741349	7746433
ChrI	7747529	7748037
ChrI	7748851	7749037
ChrI	7751012	7752039
ChrI	7760175	7763045
ChrI	7770201	7770924
ChrI	7784606	7786810
ChrI	7792540	7793075
ChrI	7795043	7795262
ChrI	7796835	7797491
ChrI	7837098	7837679
ChrI	7885289	7887260
ChrI	7889963	7890994
ChrI	7894952	7896665
ChrI	7898118	7898318
ChrI	7900147	7900952
ChrI	7901948	7905199
ChrI	7912164	7913797
ChrI	7914517	7923007
ChrI	7924244	7924873
ChrI	7925812	7926564
ChrI	7929140	7929439
ChrI	7930537	7934011
ChrI	7935394	7935804
ChrI	7938065	7940314
ChrI	7941139	7942783
ChrI	7946157	7947102
ChrI	7963693	7964851
ChrI	7967223	7969024
ChrI	7976705	7977403
ChrI	7978776	7980166
ChrI	7981038	7981729
ChrI	7989289	7990291
ChrI	7991149	7993231
ChrI	7994103	7999176
ChrI	7999937	8000800
ChrI	8001801	8007824
ChrI	8008618	8010276
ChrI	8019047	8019361
ChrI	8020104	8021153
ChrI	8023221	8024060
ChrI	8045609	8047040
ChrI	8050809	8051450
ChrI	8171837	8173039
ChrI	8182369	8184801
ChrI	8200577	8201292
ChrI	8204859	8205383
ChrI	8212968	8213926
ChrI	8220325	8220772
ChrI	8233775	8234524
ChrI	8238591	8239797
ChrI	8241700	8242095
ChrI	8245002	8249906
ChrI	8253479	8254543
ChrI	8323226	8323816
ChrI	8328278	8329684
ChrI	8331240	8333068
ChrI	8339633	8341378
ChrI	8343421	8343811
ChrI	8353996	8355784
ChrI	8356697	8357387
ChrI	8359902	8360429
ChrI	8363839	8364751
ChrI	8369036	8370473
ChrI	8371351	8373300
ChrI	8377059	8379681
ChrI	8390629	8395042
ChrI	8397320	8397618
ChrI	8399925	8400816
ChrI	8402261	8402481
ChrI	8404763	8405020
ChrI	8452046	8452307
ChrI	8454765	8456149
ChrI	8460313	8460558
ChrI	8466706	8468841
ChrI	8474696	8475415
ChrI	8476156	8477155
ChrI	8483654	8487135
ChrI	8491919	8492339
ChrI	8498152	8498654
ChrI	8501030	8501579
ChrI	8504405	8505344
ChrI	8507882	8509031
ChrI	8552947	8553342
ChrI	8556537	8558405
ChrI	8559906	8560105
ChrI	8595285	8596384
ChrI	8599960	8600617
ChrI	8602071	8603418
ChrI	8607329	8607613
ChrI	8618223	8619403
ChrI	8623124	8624748
ChrI	8638496	8639720
ChrI	8641422	8643446
ChrI	8646137	8649209
ChrI	8651708	8653626
ChrI	8656135	8657042
ChrI	8661894	8662608
ChrI	8665170	8666455
ChrI	8667617	8668265
ChrI	8669358	8670271
ChrI	8671127	8671588
ChrI	8673372	8675105
ChrI	8676608	8677120
ChrI	8679510	8679899
ChrI	8684585	8685877
ChrI	8686855	8687311
ChrI	8693167	8693825
ChrI	8695042	8695812
ChrI	8773483	8775633
ChrI	8776995	8778082
ChrI	8778954	8780946
ChrI	8781980	8782901
ChrI	8790489	8790863
ChrI	8793923	8795045
ChrI	8799676	8800131
ChrI	8812999	8813760
ChrI	8815663	8816016
ChrI	8830868	8831647
ChrI	8833317	8834375
ChrI	8837262	8838093
ChrI	8839229	8842274
ChrI	8843337	8844718
ChrI	8845640	8845983
ChrI	8848247	8849555
ChrI	8850305	8851161
ChrI	8859733	8860021
ChrI	8911435	8913197
ChrI	8914259	8916463
ChrI	8917745	8919817
ChrI	8922258	8923189
ChrI	8927485	8928652
ChrI	8935108	8935385
ChrI	8938058	8940394
ChrI	8979304	8979931
ChrI	8980707	8982248
ChrI	8990095	8991115
ChrI	8996445	8997437
ChrI	9000668	9000905
ChrI	9002151	9002765
ChrI	9005845	9006176
ChrI	9026009	9026284
ChrI	9030956	9032647
ChrI	9035222	9035534
ChrI	9047225	9048471
ChrI	9049916	9050148
ChrI	9051497	9053410
ChrI	9054304	9055107
ChrI	9055920	9056479
ChrI	9058316	9058658
ChrI	9059402	9060174
ChrI	9060880	9061302
ChrI	9063056	9064074
ChrI	9067840	9068265
ChrI	9069511	9071752
ChrI	9079029	9081082
ChrI	9086880	9089043
ChrI	9090035	9090242
ChrI	9091121	9094406
ChrI	9158791	9161121
ChrI	9161984	9167332
ChrI	9185705	9186397
ChrI	9187406	9188274
ChrI	9189438	9190249
ChrI	9205195	9207991
ChrI	9214152	9214557
ChrI	9222106	9226017
ChrI	9229314	9231138
ChrI	9233559	9234125
ChrI	9236362	9237493
ChrI	9245375	9250646
ChrI	9251561	9251879
ChrI	9257172	9257661
ChrI	9260270	9261387
ChrI	9317132	9319486
ChrI	9320558	9321169
ChrI	9324252	9325804
ChrI	9331376	9331824
ChrI	9333214	9333646
ChrI	9344843	9345066
ChrI	9345996	9348640
ChrI	9375659	9376633
ChrI	9383241	9384355
ChrI	9388120	9388541
ChrI	9400498	9401526
ChrI	9403085	9403366
ChrI	9404600	9405835
ChrI	9430180	9430940
ChrI	9463379	9463903
ChrI	9465590	9465919
ChrI	9467146	9467578
ChrI	9470811	9471519
ChrI	9476952	9477409
ChrI	9481854	9482818
ChrI	9522961	9523777
ChrI	9536136	9537893
ChrI	9546093	9546509
ChrI	9579172	9579419
ChrI	9580401	9581115
ChrI	9626224	9626961
ChrI	9630328	9634685
ChrI	9635421	9639975
ChrI	9640680	9644472
ChrI	9645507	9646866
ChrI	9647762	9651940
ChrI	9652794	9653078
ChrI	9658699	9659295
ChrI	9661168	9661450
ChrI	9779256	9779958
ChrI	9796228	9796907
ChrI	9875187	9875448
ChrI	9898956	9901461
ChrI	9947236	9948040
ChrI	10112085	10112328
ChrI	10117718	10119030
ChrI	10218891	10219619
ChrI	10235819	10237138
ChrI	10244238	10244595
ChrI	10246400	10246912
ChrI	10307343	10307531
ChrI	10380381	10380919
ChrI	10383148	10383405
ChrI	11221739	11222809
ChrI	11633281	11634081
ChrI	11636295	11637119
ChrI	11670596	11673961
ChrI	11704800	11705566
ChrI	11708555	11709320
ChrI	11712937	11713272
ChrI	11761242	11762258
ChrI	11765618	11765836
ChrI	11836653	11836913
ChrI	11842438	11842610
ChrI	11852686	11854048
ChrI	11863082	11864041
ChrI	11872498	11873282
ChrI	11911492	11911708
ChrI	11951626	11951920
ChrI	11956818	11957519
ChrI	11964999	11966563
ChrI	11969371	11970530
ChrI	12015955	12017273
ChrI	12042176	12043386
ChrI	12045261	12045907
ChrI	12151107	12151821
ChrI	12251059	12251796
ChrI	12252953	12253267
ChrI	12258136	12258428
ChrI	12260060	12260326
ChrI	12313988	12316476
ChrI	12334986	12335200
ChrI	12374583	12375133
ChrI	12377767	12378242
ChrI	12447642	12449064
ChrI	12452384	12452819
ChrI	12485133	12485722
ChrI	12493603	12495936
ChrI	12496661	12497306
ChrI	12498275	12498625
ChrI	12499328	12499600
ChrI	12584275	12585844
ChrI	12639544	12641136
ChrI	13126686	13127166
ChrI	13205902	13206491
ChrI	13328781	13329017
ChrI	13451043	13452175
ChrI	13479780	13479984
ChrI	13528641	13529162
ChrI	13529953	13530481
ChrI	13534136	13535809
ChrI	13537238	13539059
ChrI	13540120	13541500
ChrI	13543441	13543919
ChrI	13545418	13546496
ChrI	13549202	13549838
ChrI	13554458	13556109
ChrI	13557058	13557308
ChrI	13558714	13559237
ChrI	13561973	13562237
ChrI	13607663	13609163
ChrI	13652724	13653158
ChrI	13664869	13665456
ChrI	13671650	13671901
ChrI	13756013	13757034
ChrI	13757800	13760211
ChrI	13763297	13763926
ChrI	13764762	13766424
ChrI	13767632	13768124
ChrI	13769327	13770367
ChrI	13771808	13772071
ChrI	13789240	13790001
ChrI	13796704	13797657
ChrI	13801165	13801744
ChrI	13804587	13805447
ChrI	13810944	13811663
ChrI	13812374	13813527
ChrI	13815526	13816214
ChrI	13822954	13823642
ChrI	13824426	13825151
ChrI	13826175	13826522
ChrI	13851884	13852469
ChrI	13864157	13865033
ChrI	13869633	13870571
ChrI	13872550	13873735
ChrI	13874786	13875228
ChrI	13876400	13877741
ChrI	13879107	13880118
ChrI	13880880	13883877
ChrI	13885032	13885710
ChrI	13886599	13887803
ChrI	13891672	13892202
ChrI	13894614	13895782
ChrI	13899287	13899971
ChrI	13904147	13905665
ChrI	13908050	13908232
ChrI	13909079	13909472
ChrI	13911887	13912217
ChrI	13913154	13913898
ChrI	13916755	13918117
ChrI	13925754	13926409
ChrI	13936965	13937776
ChrI	13945495	13945946
ChrI	13948900	13949274
ChrI	13955122	13955928
ChrI	13956828	13957383
ChrI	13958510	13959249
ChrI	13983984	13985212
ChrI	13987193	13989375
ChrI	13990983	13991552
ChrI	13993423	13993898
ChrI	13998037	13998822
ChrI	13999576	14000317
ChrI	14002541	14002889
ChrI	14042029	14042592
ChrI	14078086	14078441
ChrI	14082175	14082518
ChrI	14083228	14083738
ChrI	14093950	14094810
ChrI	14096814	14097096
ChrI	14100649	14101250
ChrI	14104354	14106267
ChrI	14109174	14110261
ChrI	14111299	14114409
ChrI	14120222	14121248
ChrI	14122442	14123322
ChrI	14124712	14125034
ChrI	14133215	14134976
ChrI	14147063	14149748
ChrI	14212239	14213151
ChrI	14245975	14247100
ChrI	14251955	14252463
ChrI	14253663	14253877
ChrI	14259935	14262371
ChrI	14263217	14264896
ChrI	14274588	14275237
ChrI	14276932	14278184
ChrI	14278980	14280545
ChrI	14281408	14287171
ChrI	14294224	14297602
ChrI	14306701	14306946
ChrI	14308835	14309145
ChrI	14315448	14315873
ChrI	14317348	14318180
ChrI	14323526	14324881
ChrI	14325578	14326861
ChrI	14332139	14334165
ChrI	14336272	14338024
ChrI	14339700	14340233
ChrI	14341098	14341501
ChrI	14343193	14345780
ChrI	14346502	14346974
ChrI	14349311	14350971
ChrI	14353661	14355397
ChrI	14357089	14357767
ChrI	14363733	14363908
ChrI	14385696	14386376
ChrI	14389000	14390608
ChrI	14393342	14394080
ChrI	14400490	14400816
ChrI	14401863	14402488
ChrI	14432199	14434096
ChrI	14461272	14462197
ChrI	14465403	14466188
ChrI	14473745	14475393
ChrI	14478562	14479033
ChrI	14484320	14484768
ChrI	14485466	14486132
ChrI	14497894	14499113
ChrI	14503044	14504412
ChrI	14505149	14505552
ChrI	14507623	14507858
ChrI	14509475	14509698
ChrI	14515668	14516158
ChrI	14521280	14522058
ChrI	14551260	14551591
ChrI	14552888	14554570
ChrI	14558319	14559238
ChrI	14568860	14569603
ChrI	14584403	14585008
ChrI	14586483	14592170
ChrI	14594169	14594607
ChrI	14595467	14596624
ChrI	14613701	14615974
ChrI	14625107	14626225
ChrI	14630770	14631326
ChrI	14633452	14634889
ChrI	14643416	14643835
ChrI	14646529	14646740
ChrI	14652507	14654272
ChrI	14655283	14657322
ChrI	14681013	14681323
ChrI	14682542	14682742
ChrI	14727311	14727635
ChrI	14786176	14787140
ChrI	14795445	14796198
ChrI	14799569	14799921
ChrI	14801411	14801864
ChrI	14808171	14808798
ChrI	14849930	14851342
ChrI	14860407	14863043
ChrI	14869257	14869545
ChrI	14870724	14872077
ChrI	14875195	14877798
ChrI	14878646	14879217
ChrI	14880788	14884259
ChrI	14884973	14885566
ChrI	14920379	14920878
ChrI	14921982	14922523
ChrI	14924356	14924968
ChrI	14939843	14940803
ChrI	14941542	14942387
ChrI	14946683	14948922
ChrI	14968169	14971540
ChrI	15015024	15015505
ChrI	15018329	15018863
ChrI	15036425	15037607
ChrI	15052372	15053497
ChrI	15062799	15063460
ChrI	15070279	15071329
ChrI	15073516	15074003
ChrI	15083076	15083607
ChrI	15085116	15085432
ChrI	15088011	15088719
ChrI	15113612	15114481
ChrI	15122172	15122488
ChrI	15139549	15140020
ChrI	15186124	15186744
ChrI	15189141	15189352
ChrI	15191388	15193559
ChrI	15196808	15198393
ChrI	15203373	15203816
ChrI	15229739	15230381
ChrI	15231240	15232999
ChrI	15250330	15250963
ChrI	15270657	15271450
ChrI	15272198	15273183
ChrI	15278532	15279925
ChrI	15281337	15282010
ChrI	15284104	15285998
ChrI	15290259	15292975
ChrI	15293908	15295819
ChrI	15296848	15297349
ChrI	15298558	15299245
ChrI	15301914	15303624
ChrI	15383085	15384897
ChrI	15386264	15386804
ChrI	15392990	15394393
ChrI	15395082	15395846
ChrI	15396738	15397031
ChrI	15397972	15400665
ChrI	15403577	15408918
ChrI	15411466	15411925
ChrI	15415020	15421028
ChrI	15421935	15426105
ChrI	15427145	15427458
ChrI	15428163	15428478
ChrI	15431659	15432245
ChrI	15434063	15435361
ChrI	15436690	15437495
ChrI	15445626	15448611
ChrI	15449888	15454178
ChrI	15455228	15458966
ChrI	15462826	15463361
ChrI	15467225	15468630
ChrI	15469518	15473381
ChrI	15474628	15477922
ChrI	15478877	15480049
ChrI	15483247	15483460
ChrI	15484470	15488379
ChrI	15489472	15490201
ChrI	15501143	15503184
ChrI	15504898	15505888
ChrI	15515925	15517540
ChrI	15518748	15521097
ChrI	15523610	15523802
ChrI	15529238	15530609
ChrI	15534711	15535251
ChrI	15541188	15541374
ChrI	15543890	15544214
ChrI	15557748	15560951
ChrI	15564444	15564658
ChrI	15568316	15569310
ChrI	15571539	15571980
ChrI	15573079	15573390
ChrI	15579037	15579630
ChrI	15580463	15580889
ChrI	15581837	15582042
ChrI	15584876	15585340
ChrI	15586877	15587459
ChrI	15589144	15592939
ChrI	15593880	15596183
ChrI	15596876	15599959
ChrI	15609572	15611006
ChrI	15612113	15613734
ChrI	15614678	15615086
ChrI	15616238	15617183
ChrI	15619953	15623624
ChrI	15624367	15627909
ChrI	15628794	15631351
ChrI	15632195	15635154
ChrI	15636499	15639942
ChrI	15642607	15650194
ChrI	15651455	15663495
ChrI	15664271	15670674
ChrI	15672383	15673021
ChrI	15673921	15674613
ChrI	15675496	15678961
ChrI	15679712	15679906
ChrI	15706794	15709361
ChrI	15710070	15710546
ChrI	15711271	15712268
ChrI	15714438	15715267
ChrI	15717493	15718142
ChrI	15719378	15719564
ChrI	15721412	15722921
ChrI	15726776	15730372
ChrI	15731281	15732139
ChrI	15732854	15734703
ChrI	15736440	15741119
ChrI	15742415	15743439
ChrI	15745792	15746103
ChrI	15747810	15749371
ChrI	15750272	15752515
ChrI	15753482	15754946
ChrI	15756714	15761550
ChrI	15762568	15764991
ChrI	15765753	15766170
ChrI	15766876	15769838
ChrI	15770533	15771192
ChrI	15771957	15797730
ChrI	15801168	15803080
ChrI	15803990	15804649
ChrI	15848543	15849630
ChrI	15851876	15855143
ChrI	15856024	15893462
ChrI	15894891	15895536
ChrI	15896677	15898521
ChrI	15899586	15899893
ChrI	15900895	15901392
ChrI	15902389	15903395
ChrI	15904453	15905430
ChrI	15907410	15909072
ChrI	15909949	15911181
ChrI	15911969	15914945
ChrI	15918772	15921107
ChrI	15922154	15922823
ChrI	15924676	15929109
ChrI	15929890	15931766
ChrI	15932792	15939294
ChrI	15940146	15947061
ChrI	15958632	15963280
ChrI	15965144	15965879
ChrI	15966688	15971192
ChrI	15972386	15973821
ChrI	16022304	16023085
ChrI	16025202	16026333
ChrI	16028993	16029639
ChrI	16031073	16032280
ChrI	16033177	16034381
ChrI	16035482	16036743
ChrI	16038092	16040497
ChrI	16041784	16043248
ChrI	16044152	16046956
ChrI	16050560	16053105
ChrI	16055147	16056177
ChrI	16057458	16062023
ChrI	16062822	16063923
ChrI	16064882	16071345
ChrI	16072343	16072802
ChrI	16074407	16078631
ChrI	16093159	16093422
ChrI	16094266	16096014
ChrI	16097300	16098149
ChrI	16099295	16100223
ChrI	16101230	16102590
ChrI	16103730	16104836
ChrI	16113895	16114876
ChrI	16115572	16115896
ChrI	16117917	16120732
ChrI	16121988	16122302
ChrI	16124495	16125000
ChrI	16127174	16127744
ChrI	16129013	16129331
ChrI	16157731	16160054
ChrI	16161864	16162134
ChrI	16163883	16166178
ChrI	16174989	16175566
ChrI	16176407	16176587
ChrI	16177316	16177682
ChrI	16179789	16182835
ChrI	16183667	16189249
ChrI	16190372	16192945
ChrI	16193912	16194840
ChrI	16197156	16209110
ChrI	16209804	16216225
ChrI	16217281	16221940
ChrI	16222807	16228549
ChrI	16229253	16231165
ChrI	16232494	16235532
ChrI	16238843	16239128
ChrI	16295932	16296223
ChrI	16296915	16299399
ChrI	16326471	16327200
ChrI	16327936	16330665
ChrI	16331364	16334021
ChrI	16340380	16340728
ChrI	16342231	16342707
ChrI	16345037	16346033
ChrI	16349527	16354146
ChrI	16355087	16367650
ChrI	16394051	16394778
ChrI	16397759	16399096
ChrI	16401119	16402311
ChrI	16444873	16445577
ChrI	16447283	16449725
ChrI	16451913	16452515
ChrI	16456614	16457482
ChrI	16458422	16460104
ChrI	16461037	16464670
ChrI	16465548	16466552
ChrI	16467759	16468294
ChrI	16473818	16474188
ChrI	16476301	16477422
ChrI	16478841	16480355
ChrI	16486381	16487469
ChrI	16490555	16491683
ChrI	16494440	16495561
ChrI	16508627	16511770
ChrI	16513216	16516479
ChrI	16517300	16518282
ChrI	16521111	16521374
ChrI	16522720	16523289
ChrI	16524336	16524993
ChrI	16526325	16527449
ChrI	16530930	16537136
ChrI	16538074	16539453
ChrI	16540349	16542557
ChrI	16545609	16545916
ChrI	16550169	16555295
ChrI	16556570	16563944
ChrI	16564854	16566000
ChrI	16566999	16567847
ChrI	16568628	16571270
ChrI	16572104	16572411
ChrI	16574287	16576206
ChrI	16577208	16578494
ChrI	16579187	16580076
ChrI	16580829	16581776
ChrI	16582587	16584088
ChrI	16585268	16589767
ChrI	16590627	16591967
ChrI	16592943	16593666
ChrI	16594452	16601880
ChrI	16603408	16605232
ChrI	16608342	16609178
ChrI	16609976	16610306
ChrI	16611249	16612440
ChrI	16613401	16614470
ChrI	16615736	16616015
ChrI	16619529	16619749
ChrI	16620913	16621363
ChrI	16623441	16625151
ChrI	16626184	16626743
ChrI	16627893	16629988
ChrI	16630982	16633913
ChrI	16634771	16634976
ChrI	16639360	16642406
ChrI	16644170	16644843
ChrI	16646488	16648347
ChrI	16655144	16655708
ChrI	16656559	16656760
ChrI	16658241	16660857
ChrI	16662552	16664495
ChrI	16667966	16670524
ChrI	16672310	16673782
ChrI	16675670	16675971
ChrI	16677185	16678645
ChrI	16682159	16682873
ChrI	16684968	16685147
ChrI	16690686	16693900
ChrI	16697033	16698595
ChrI	16699715	16704912
ChrI	16706032	16707353
ChrI	16708800	16709492
ChrI	16713597	16714262
ChrI	16717264	16717583
ChrI	16720576	16721969
ChrI	16725189	16725431
ChrI	16727877	16728143
ChrI	16753421	16755272
ChrI	16758217	16758729
ChrI	16760538	16763516
ChrI	16772323	16773993
ChrI	16774766	16777143
ChrI	16857703	16857935
ChrI	16860800	16862556
ChrI	16867013	16867222
ChrI	16893823	16894953
ChrI	16895798	16896234
ChrI	16937101	16938182
ChrI	16960543	16963847
ChrI	16966133	16971617
ChrI	16972407	16973387
ChrI	16975219	16975581
ChrI	16977692	16980253
ChrI	16982172	16982520
ChrI	16983260	16984343
ChrI	16986291	16986838
ChrI	16991869	16992252
ChrI	16994701	16995111
ChrI	16996531	16998772
ChrI	17000010	17000185
ChrI	17001229	17002159
ChrI	17004399	17005865
ChrI	17007425	17008631
ChrI	17009338	17009867
ChrI	17010873	17014283
ChrI	17016348	17017540
ChrI	17019913	17022761
ChrI	17025190	17025382
ChrI	17026594	17027134
ChrI	17029718	17032643
ChrI	17033927	17034280
ChrI	17035814	17036196
ChrI	17036903	17037160
ChrI	17038523	17039051
ChrI	17039770	17040505
ChrI	17041873	17043178
ChrI	17043905	17047093
ChrI	17055135	17055596
ChrI	17056518	17059125
ChrI	17059997	17061564
ChrI	17062649	17063339
ChrI	17065648	17068915
ChrI	17074031	17075959
ChrI	17077164	17078007
ChrI	17083713	17084246
ChrI	17085646	17086612
ChrI	17087760	17090444
ChrI	17092674	17096968
ChrI	17098135	17098722
ChrI	17102388	17103539
ChrI	17104945	17108571
ChrI	17109587	17110927
ChrI	17113082	17114089
ChrI	17120088	17121274
ChrI	17123814	17124987
ChrI	17127181	17127696
ChrI	17136604	17137904
ChrI	17139077	17142004
ChrI	17142890	17146864
ChrI	17186666	17186996
ChrI	17188831	17189020
ChrI	17216645	17217039
ChrI	17220406	17221448
ChrI	17222139	17223324
ChrI	17226031	17226464
ChrI	17227196	17228587
ChrI	17232445	17233045
ChrI	17233740	17234826
ChrI	17238233	17239094
ChrI	17240411	17240635
ChrI	17241657	17241939
ChrI	17244422	17244614
ChrI	17255116	17255762
ChrI	17257337	17262764
ChrI	17275781	17276070
ChrI	17285763	17287971
ChrI	17292264	17292947
ChrI	17296582	17298214
ChrI	17307187	17308221
ChrI	17310257	17313369
ChrI	17314177	17315881
ChrI	17317632	17323244
ChrI	17324026	17324742
ChrI	17326014	17327115
ChrI	17328243	17332312
ChrI	17333599	17334110
ChrI	17336781	17337860
ChrI	17343400	17345731
ChrI	17346714	17347891
ChrI	17349738	17354896
ChrI	17357597	17359504
ChrI	17360328	17360857
ChrI	17361568	17361999
ChrI	17366749	17367609
ChrI	17368361	17368781
ChrI	17373063	17373722
ChrI	17375855	17377301
ChrI	17378211	17379154
ChrI	17380466	17380806
ChrI	17382439	17382775
ChrI	17385916	17388112
ChrI	17389961	17392243
ChrI	17393336	17394002
ChrI	17394741	17396399
ChrI	17397208	17397851
ChrI	17399837	17400211
ChrI	17400956	17402820
ChrI	17408641	17409705
ChrI	17410718	17411924
ChrI	17412798	17413903
ChrI	17448322	17448753
ChrI	17454584	17454892
ChrI	17456499	17459560
ChrI	17618178	17619631
ChrI	17626812	17627607
ChrI	17679667	17680322
ChrI	17682017	17682980
ChrI	17683759	17686520
ChrI	17687235	17687419
ChrI	17700645	17702128
ChrI	17703858	17705261
ChrI	17707317	17708564
ChrI	17709466	17710751
ChrI	17712424	17712704
ChrI	17720610	17720895
ChrI	17723082	17724475
ChrI	17726193	17726756
ChrI	17727976	17728725
ChrI	17734885	17735464
ChrI	17737616	17738568
ChrI	17740249	17741155
ChrI	17745133	17746956
ChrI	17749907	17750554
ChrI	17759748	17760285
ChrI	17761942	17762251
ChrI	17764427	17765481
ChrI	17766334	17767004
ChrI	17768477	17769391
ChrI	17770761	17772710
ChrI	17773792	17775650
ChrI	17789231	17790654
ChrI	17818740	17823428
ChrI	17842333	17843209
ChrI	17844696	17847045
ChrI	17848757	17849861
ChrI	17854879	17856853
ChrI	17859650	17860110
ChrI	17862605	17863187
ChrI	17864506	17865131
ChrI	17869930	17872521
ChrI	17873469	17874224
ChrI	17891910	17895788
ChrI	17896820	17897000
ChrI	17912272	17913677
ChrI	17914682	17915977
ChrI	17922982	17923837
ChrI	17937530	17937786
ChrI	17938544	17938905
ChrI	17939741	17941076
ChrI	17943246	17944230
ChrI	17952438	17952730
ChrI	17955704	17956004
ChrI	18083764	18084879
ChrI	18085742	18086321
ChrI	18117879	18118918
ChrI	18167188	18169456
ChrI	18176050	18176873
ChrI	18233106	18234014
ChrI	18257289	18259476
ChrI	18260315	18261325
ChrI	18275700	18276208
ChrI	18279823	18281032
ChrI	18282421	18283529
ChrI	18285729	18286634
ChrI	18288645	18288825
ChrI	18291167	18292145
ChrI	18322757	18323548
ChrI	18328141	18328913
ChrI	18330301	18331040
ChrI	18331753	18334538
ChrI	18340469	18341159
ChrI	18351521	18352202
ChrI	18356524	18357450
ChrI	18358648	18361101
ChrI	18361991	18362851
ChrI	18363820	18366678
ChrI	18368457	18370172
ChrI	18371243	18371785
ChrI	18375586	18376304
ChrI	18378735	18379831
ChrI	18380930	18381217
ChrI	18383563	18383751
ChrI	18385688	18387157
ChrI	18393997	18394652
ChrI	18398035	18398741
ChrI	18419416	18421742
ChrI	18511094	18511458
ChrI	18518171	18518859
ChrI	18519925	18520289
ChrI	18530782	18531847
ChrI	18532548	18532794
ChrI	18534441	18535391
ChrI	18537555	18539005
ChrI	18542103	18542425
ChrI	18590344	18590823
ChrI	18592368	18592581
ChrI	18593432	18594218
ChrI	18595125	18595493
ChrI	18599475	18600878
ChrI	18602283	18603567
ChrI	18604599	18606104
ChrI	18607078	18608223
ChrI	18612722	18613984
ChrI	18617018	18617698
ChrI	18619268	18620004
ChrI	18660981	18661807
ChrI	18662623	18663925
ChrI	18665842	18666492
ChrI	18691856	18692112
ChrI	18700522	18700878
ChrI	18702880	18703620
ChrI	18706365	18707255
ChrI	18711089	18712406
ChrI	18723331	18723749
ChrI	18724509	18733815
ChrI	18734514	18735688
ChrI	18738425	18740967
ChrI	18742727	18743936
ChrI	18744760	18745227
ChrI	18747645	18752484
ChrI	18753856	18754432
ChrI	18755890	18757396
ChrI	18759352	18760090
ChrI	18760817	18761843
ChrI	18764098	18764917
ChrI	18774502	18782936
ChrI	18784894	18791966
ChrI	18793142	18800388
ChrI	18802840	18803728
ChrI	18807865	18808262
ChrI	18811400	18813835
ChrI	18817391	18817804
ChrI	18818844	18819918
ChrI	18822170	18823429
[truncated: 15,814 more rows]

## Sheet: H3K9me3
Chr	start	stop
ChrI	217	11071
ChrI	74336	74814
ChrI	82943	84719
ChrI	111145	111388
ChrI	237554	238026
ChrI	246797	256004
ChrI	410050	411446
ChrI	459280	460773
ChrI	463121	465143
ChrI	469297	470467
ChrI	473561	474498
ChrI	475192	477516
ChrI	478236	481451
ChrI	488731	490467
ChrI	512172	512370
ChrI	534466	534809
ChrI	535639	536868
ChrI	546655	546818
ChrI	680766	680966
ChrI	866876	868611
ChrI	872215	872509
ChrI	918373	919711
ChrI	920423	922009
ChrI	924067	926426
ChrI	927146	929153
ChrI	936691	937364
ChrI	981485	981774
ChrI	997228	997762
ChrI	1012708	1013648
ChrI	1026624	1026834
ChrI	1042279	1043786
ChrI	1106850	1107582
ChrI	1130349	1130938
ChrI	1160834	1162195
ChrI	1168642	1173162
ChrI	1174051	1175374
ChrI	1177957	1179289
ChrI	1182054	1183381
ChrI	1185403	1185597
ChrI	1194449	1194657
ChrI	1195400	1198562
ChrI	1214750	1215280
ChrI	1343562	1343843
ChrI	1345347	1346191
ChrI	1369183	1381712
ChrI	1383747	1384552
ChrI	1386384	1386776
ChrI	1392456	1393312
ChrI	1399195	1402165
ChrI	1418420	1418887
ChrI	1421934	1423360
ChrI	1424289	1425207
ChrI	1462348	1462896
ChrI	1466163	1466781
ChrI	1473490	1474077
ChrI	1478160	1479670
ChrI	1485009	1485231
ChrI	1498316	1512102
ChrI	1513174	1531838
ChrI	1547216	1548259
ChrI	1552336	1552746
ChrI	1557504	1558189
ChrI	1561134	1563662
ChrI	1575662	1579598
ChrI	1582257	1583044
ChrI	1586984	1587294
ChrI	1588555	1589193
ChrI	1619056	1621928
ChrI	1624541	1624708
ChrI	1677960	1680987
ChrI	1692649	1693111
ChrI	1701361	1702084
ChrI	1728979	1729289
ChrI	1743234	1743806
ChrI	1755180	1755631
ChrI	1768478	1769175
ChrI	1778948	1779419
ChrI	1796655	1796952
ChrI	1803505	1804251
ChrI	1805159	1806396
ChrI	1809602	1809954
ChrI	1823186	1824050
ChrI	1830586	1831102
ChrI	1835372	1836609
ChrI	1862612	1864249
ChrI	1903164	1903733
ChrI	1904631	1905856
ChrI	1910365	1910591
ChrI	1915410	1915833
ChrI	2061211	2064008
ChrI	2093949	2094899
ChrI	2197235	2198186
ChrI	2198872	2199440
ChrI	2233064	2234215
ChrI	2250331	2251008
ChrI	2327524	2329744
ChrI	2330805	2331348
ChrI	2333791	2334077
ChrI	2343230	2343730
ChrI	2381525	2384815
ChrI	2397772	2398038
ChrI	2436603	2436845
ChrI	2442948	2444382
ChrI	2448896	2449565
ChrI	2516505	2517351
ChrI	2519112	2519744
ChrI	2573432	2574019
ChrI	2636481	2636714
ChrI	2646759	2647232
ChrI	2667261	2668165
ChrI	2693154	2693344
ChrI	2726006	2727301
ChrI	2759792	2760420
ChrI	2762143	2762311
ChrI	2763985	2765069
ChrI	2766242	2766443
ChrI	2767251	2767662
ChrI	2798637	2799337
ChrI	2801148	2801497
ChrI	2837254	2837632
ChrI	2897415	2898874
ChrI	2922712	2924000
ChrI	2956073	2961037
ChrI	2962809	2963780
ChrI	2973939	2975073
ChrI	2978479	2978760
ChrI	2983989	2985481
ChrI	3226323	3227279
ChrI	3227977	3229628
ChrI	3236487	3237509
ChrI	3283167	3283807
ChrI	3296394	3296630
ChrI	3340397	3340953
ChrI	3346225	3346402
ChrI	3349051	3349522
ChrI	3362913	3364234
ChrI	3364906	3369824
ChrI	3383576	3385024
ChrI	3385714	3386091
ChrI	3398482	3398993
ChrI	3555255	3555796
ChrI	3568793	3570590
ChrI	3590636	3592280
ChrI	3600202	3600947
ChrI	3637875	3638699
ChrI	3639568	3640513
ChrI	3641766	3642851
ChrI	3643577	3643756
ChrI	3656002	3659102
ChrI	3661833	3666930
ChrI	3668139	3668323
ChrI	3693603	3694343
ChrI	3713373	3714471
ChrI	3745602	3746858
ChrI	3747725	3748223
ChrI	3778767	3779346
ChrI	3786200	3786592
ChrI	3805865	3806404
ChrI	3821213	3822795
ChrI	3854941	3855695
ChrI	3894383	3895101
ChrI	3901228	3901403
ChrI	3904465	3904669
ChrI	3998402	3998916
ChrI	4011610	4012250
ChrI	4015739	4022547
ChrI	4023316	4028297
ChrI	4044927	4045469
ChrI	4078141	4078656
ChrI	4103642	4104180
ChrI	4132471	4134857
ChrI	4236230	4236708
ChrI	4244068	4244610
ChrI	4245369	4246411
ChrI	4247100	4248080
ChrI	4252175	4252780
ChrI	4359263	4360143
ChrI	4364798	4365339
ChrI	4370881	4371140
ChrI	4382180	4392500
ChrI	4399770	4400393
ChrI	4403101	4404086
ChrI	4429938	4430606
ChrI	4451100	4451340
ChrI	4502699	4503453
ChrI	4537554	4537733
ChrI	4538410	4538613
ChrI	4690213	4694372
ChrI	4722379	4723331
ChrI	4729843	4730219
ChrI	4731012	4731641
ChrI	4782174	4782988
ChrI	4784255	4785008
ChrI	4785722	4786469
ChrI	4830698	4831298
ChrI	4838582	4841183
ChrI	4841833	4844256
ChrI	4889512	4892640
ChrI	5043073	5045214
ChrI	5047748	5048039
ChrI	5051511	5054112
ChrI	5074765	5077326
ChrI	5083985	5084841
ChrI	5142634	5144367
ChrI	5145121	5146736
ChrI	5214927	5215820
ChrI	5239520	5240536
ChrI	5251121	5251843
ChrI	5267345	5278690
ChrI	5343783	5352981
ChrI	5407633	5410315
ChrI	5451309	5452175
ChrI	5458297	5459400
ChrI	5675839	5678239
ChrI	5691777	5691955
ChrI	5730747	5730933
ChrI	5732084	5732421
ChrI	5733198	5734489
ChrI	5735541	5739557
ChrI	5746234	5747507
ChrI	5792932	5795712
ChrI	5796822	5797297
ChrI	5821968	5822428
ChrI	5842420	5844289
ChrI	5857451	5862132
ChrI	5961900	5962133
ChrI	5968167	5979920
ChrI	5981152	5982138
ChrI	6050428	6051158
ChrI	6053341	6054867
ChrI	6100143	6100367
ChrI	6101518	6101820
ChrI	6102529	6105493
ChrI	6137329	6138090
ChrI	6156849	6162970
ChrI	6243547	6246424
ChrI	6247365	6249109
ChrI	6263392	6264282
ChrI	6265842	6267074
ChrI	6304758	6306541
ChrI	6340945	6346475
ChrI	6361006	6361750
ChrI	6438594	6439058
ChrI	6490094	6492976
ChrI	6498547	6500456
ChrI	6534480	6534752
ChrI	6559753	6560629
ChrI	6567606	6569749
ChrI	6614074	6614469
ChrI	6633713	6634123
ChrI	6635023	6635472
ChrI	6655289	6656054
ChrI	6665704	6666113
ChrI	6667125	6667327
ChrI	6670265	6671510
ChrI	6673472	6679206
ChrI	6680199	6683642
ChrI	6731941	6732617
ChrI	6836208	6837614
ChrI	6853297	6859238
ChrI	6891220	6891524
ChrI	6918874	6919159
ChrI	6935851	6936589
ChrI	6937994	6940167
ChrI	6959618	6960126
ChrI	6961626	6963955
ChrI	7052294	7054698
ChrI	7065987	7074396
ChrI	7076610	7089933
ChrI	7090648	7093906
ChrI	7094713	7099520
ChrI	7102291	7103960
ChrI	7104897	7109373
ChrI	7110291	7113377
ChrI	7221216	7222954
ChrI	7239124	7240516
ChrI	7241429	7244685
ChrI	7295796	7296112
ChrI	7354843	7355482
ChrI	7442520	7443029
ChrI	7444733	7446291
ChrI	7470331	7472352
ChrI	7474895	7475194
ChrI	7577674	7577974
ChrI	7589972	7590468
ChrI	7687896	7691676
ChrI	7719797	7721376
ChrI	7726445	7728510
ChrI	7743599	7750115
ChrI	7885933	7886177
ChrI	7978386	7980659
ChrI	7981472	7981946
ChrI	7984343	7984881
ChrI	7991519	7991833
ChrI	7993640	8000672
ChrI	8001571	8010095
ChrI	8020116	8021121
ChrI	8097876	8098081
ChrI	8131862	8132601
ChrI	8158127	8158876
ChrI	8365516	8366374
ChrI	8498117	8509094
ChrI	8509794	8510061
ChrI	8552883	8554191
ChrI	8554957	8560238
ChrI	8922056	8922365
ChrI	8936141	8936339
ChrI	9317814	9319407
ChrI	9430808	9430978
ChrI	9492316	9492508
ChrI	9497656	9498165
ChrI	9501009	9502666
ChrI	9564369	9564790
ChrI	9612702	9613464
ChrI	9615084	9615271
ChrI	9684594	9685731
ChrI	9771899	9772386
ChrI	9984628	9985882
ChrI	10031910	10032881
ChrI	10183672	10186421
ChrI	10237984	10245833
ChrI	10495886	10498095
ChrI	10520257	10520564
ChrI	10740290	10740644
ChrI	10952849	10955955
ChrI	10969419	10972321
ChrI	10973010	10975640
ChrI	10993030	10994724
ChrI	11027115	11027919
ChrI	11032578	11033181
ChrI	11058362	11061338
ChrI	11227378	11227996
ChrI	11238186	11239428
ChrI	11240614	11241240
ChrI	11293145	11294007
ChrI	11310122	11310739
ChrI	11345394	11346423
ChrI	11350270	11353354
ChrI	11354129	11355940
ChrI	11359884	11360154
ChrI	11459987	11460176
ChrI	11479654	11480286
ChrI	11481140	11482040
ChrI	11490542	11490978
ChrI	11515834	11516269
ChrI	11564362	11565540
ChrI	11566437	11569276
ChrI	11705553	11706797
ChrI	11710477	11711492
ChrI	11763843	11764491
ChrI	11838544	11838917
ChrI	11961465	11961692
ChrI	12153149	12153670
ChrI	12494924	12500289
ChrI	12799056	12799360
ChrI	12901691	12903913
ChrI	13120372	13120671
ChrI	13125571	13126300
ChrI	13363314	13363560
ChrI	13379076	13379238
ChrI	13379966	13382204
ChrI	13608629	13609105
ChrI	13766965	13767489
ChrI	13771887	13772612
ChrI	13904286	13905703
ChrI	14038252	14040107
ChrI	14042550	14046269
ChrI	14047017	14048312
ChrI	14093255	14094829
ChrI	14146481	14149875
ChrI	14156854	14157624
ChrI	14200454	14204755
ChrI	14212037	14215382
ChrI	14263459	14263763
ChrI	14288894	14289171
ChrI	14343921	14345327
ChrI	14345992	14347754
ChrI	14354927	14357699
ChrI	14393278	14393877
ChrI	14432050	14432653
ChrI	14510852	14512593
ChrI	14533915	14536300
ChrI	14679994	14683260
ChrI	14812590	14813085
ChrI	14828961	14833308
ChrI	14835064	14836153
ChrI	14987439	14989323
ChrI	15087050	15087274
ChrI	15112990	15114853
ChrI	15148059	15149433
ChrI	15154458	15156820
ChrI	15229785	15230942
ChrI	15299530	15299885
ChrI	15307955	15310822
ChrI	15399803	15400277
ChrI	15404243	15404537
ChrI	15426831	15427254
ChrI	15558016	15561109
ChrI	15626749	15627642
ChrI	15632333	15632738
ChrI	15642614	15643037
ChrI	15665308	15670461
ChrI	15675165	15676634
ChrI	15677472	15678423
ChrI	15718001	15718273
ChrI	15722724	15723593
ChrI	15724321	15727029
ChrI	15728486	15733086
ChrI	15735330	15736502
ChrI	15737390	15738894
ChrI	15740673	15740969
ChrI	15754060	15754384
ChrI	15758158	15758358
ChrI	15767134	15767425
ChrI	15769815	15797979
ChrI	15800640	15803129
ChrI	15803972	15804810
ChrI	15848503	15849661
ChrI	15851479	15898211
ChrI	15902319	15903149
ChrI	15904494	15906866
ChrI	15907549	15908929
ChrI	15910999	15912157
ChrI	15924635	15925281
ChrI	15926044	15926220
ChrI	15926872	15930175
ChrI	15931042	15932257
ChrI	15933078	15933460
ChrI	15940332	15940576
ChrI	15944506	15945730
ChrI	15946610	15946890
ChrI	15959263	15959931
ChrI	15967889	15968195
ChrI	15969515	15970255
ChrI	16032404	16033226
ChrI	16039299	16039718
ChrI	16042818	16043824
ChrI	16052251	16052716
ChrI	16053761	16056147
ChrI	16058723	16063468
ChrI	16070109	16070353
ChrI	16092620	16093646
ChrI	16094898	16095787
ChrI	16156459	16157440
ChrI	16162803	16163555
ChrI	16183153	16183935
ChrI	16189783	16190736
ChrI	16191762	16192066
ChrI	16193495	16193718
ChrI	16202361	16202910
ChrI	16204282	16204703
ChrI	16205481	16207842
ChrI	16211711	16212266
ChrI	16214093	16215626
ChrI	16216497	16216715
ChrI	16220273	16221903
ChrI	16224998	16226448
ChrI	16227346	16228741
ChrI	16234643	16236185
ChrI	16241141	16245925
ChrI	16327699	16334236
ChrI	16342414	16344275
ChrI	16349663	16351088
ChrI	16352252	16353412
ChrI	16357602	16358351
ChrI	16359226	16369967
ChrI	16462137	16462529
ChrI	16508834	16510438
ChrI	16533016	16534970
ChrI	16580882	16581260
ChrI	16582233	16583281
ChrI	16584001	16585301
ChrI	16586440	16587582
ChrI	16618503	16620054
ChrI	16658832	16659042
ChrI	16661635	16662384
ChrI	16667082	16667781
ChrI	16752875	16756717
ChrI	16760905	16763216
ChrI	16775840	16779518
ChrI	16802144	16802589
ChrI	16937473	16939199
ChrI	16940655	16942580
ChrI	17010986	17011299
ChrI	17013243	17013635
ChrI	17035252	17036116
ChrI	17061591	17063016
ChrI	17135863	17138243
ChrI	17139042	17139228
ChrI	17140834	17141282
ChrI	17143745	17144532
ChrI	17322937	17323246
ChrI	17329454	17329816
ChrI	17368318	17368752
ChrI	17369687	17370524
ChrI	17371547	17373059
ChrI	17374540	17375273
ChrI	17402329	17403868
ChrI	17407410	17407950
ChrI	17408946	17413932
ChrI	17454522	17456759
ChrI	17457443	17460063
ChrI	17468697	17468880
ChrI	17548423	17548933
ChrI	17634165	17635861
ChrI	17744619	17746068
ChrI	17819426	17819791
ChrI	17844895	17845703
ChrI	17891722	17899505
ChrI	18175347	18176299
ChrI	18258221	18259474
ChrI	18368241	18368946
ChrI	18371864	18372499
ChrI	18378613	18378975
ChrI	18410711	18411563
ChrI	18418771	18419943
ChrI	18420855	18421250
ChrI	18447034	18447987
ChrI	18498600	18502203
ChrI	18517370	18520241
ChrI	18521498	18522985
ChrI	18534742	18536146
ChrI	18569589	18572148
ChrI	18572866	18573728
ChrI	18605688	18606098
ChrI	18666108	18666785
ChrI	18727337	18729444
ChrI	18730212	18730788
ChrI	18732204	18732440
ChrI	18733541	18735193
ChrI	18748395	18748865
ChrI	18749534	18753453
ChrI	18787338	18788185
ChrI	18789031	18790699
ChrI	18791434	18792566
ChrI	18793306	18794882
ChrI	18796870	18803775
ChrI	18810304	18813039
ChrI	18830404	18830791
ChrI	18831586	18834922
ChrI	18859322	18859485
ChrI	18902571	18904707
ChrI	18914761	18915406
ChrI	18916844	18918670
ChrI	18920094	18920285
ChrI	18945778	18946547
ChrI	18955166	18955580
ChrI	18956772	18957191
ChrI	18971776	18974719
ChrI	19109118	19111367
ChrI	19125558	19126372
ChrI	19128170	19128754
ChrI	19130579	19131227
ChrI	19132165	19132728
ChrI	19134149	19134370
ChrI	19136916	19138544
ChrI	19215352	19216091
ChrI	19216974	19217243
ChrI	19226051	19226332
ChrI	19254586	19254794
ChrI	19256171	19256984
ChrI	19259638	19260352
ChrI	19262482	19262700
ChrI	19272134	19272350
ChrI	19275874	19276174
ChrI	19304547	19304754
ChrI	19344253	19344856
ChrI	19363864	19364522
ChrI	19403332	19404135
ChrI	19411075	19412334
ChrI	19413375	19414358
ChrI	19425689	19425985
ChrI	19446866	19447762
ChrI	19484911	19485176
ChrI	19496720	19498435
ChrI	19503400	19503625
ChrI	19513885	19514702
ChrI	19521041	19521901
ChrI	19563085	19563592
ChrI	19566268	19567220
ChrI	19601677	19601926
ChrI	19614977	19615608
ChrI	19650661	19651565
ChrI	19683421	19683944
ChrI	19684985	19686192
ChrI	19715319	19715948
ChrI	19734342	19736007
ChrI	19761090	19768583
ChrI	19855006	19855371
ChrI	19926876	19927180
ChrI	19943641	19945608
ChrI	19946931	19947165
ChrI	19977337	19978001
ChrI	19979764	19980296
ChrI	19983496	19984048
ChrI	19984930	19988110
ChrI	19989083	19989456
ChrI	19995781	19996355
ChrI	19997901	20006917
ChrI	20008224	20010887
ChrI	20013670	20016886
ChrI	20018096	20018778
ChrI	20026378	20027296
ChrI	20028616	20029240
ChrI	20066851	20067653
ChrI	20125690	20126549
ChrI	20134473	20134689
ChrI	20140519	20141176
ChrI	20149177	20152119
ChrI	20156638	20156877
ChrI	20174121	20174460
ChrI	20223583	20223782
ChrI	20233458	20234243
ChrI	20242068	20246468
ChrI	20303459	20303806
ChrI	20327680	20328015
ChrI	20363314	20363902
ChrI	20456647	20457329
ChrI	20516921	20517160
ChrI	20518287	20518856
ChrI	20541411	20542193
ChrI	20565052	20565257
ChrI	20567508	20568630
ChrI	20588131	20588296
ChrI	20601194	20605032
ChrI	20788883	20792536
ChrI	20800518	20802568
ChrI	20970687	20971732
ChrI	20981372	20982632
ChrI	21027048	21028657
ChrI	21029398	21061276
ChrI	21118578	21119169
ChrI	21132255	21132650
ChrI	21158583	21159235
ChrI	21188731	21189018
ChrI	21190093	21191300
ChrI	21204671	21207718
ChrI	21260237	21260464
ChrI	21261386	21261877
ChrI	21276239	21280363
ChrI	21485983	21486664
ChrI	21551734	21552785
ChrI	21554771	21555732
ChrI	21665393	21666736
ChrI	21676723	21677311
ChrI	21883578	21892493
ChrI	21902622	21904524
ChrI	21984840	21988453
ChrI	21991069	21991675
ChrI	22040238	22041081
ChrI	22170610	22171432
ChrI	22172141	22172785
ChrI	22367905	22368774
ChrI	22488193	22488787
ChrI	22491619	22492444
ChrI	22525289	22526273
ChrI	22537922	22539125
ChrI	22544150	22544878
ChrI	22546398	22548375
ChrI	22549112	22551226
ChrI	22554821	22557446
ChrI	22571434	22572589
ChrI	22588185	22588573
ChrI	22589273	22589866
ChrI	22668480	22669352
ChrI	22680350	22680902
ChrI	22704619	22705410
ChrI	22729791	22730020
ChrI	22730742	22737502
ChrI	22741666	22742574
ChrI	22765298	22766002
ChrI	22774319	22774976
ChrI	22794700	22797563
ChrI	22798374	22801532
ChrI	22802236	22803925
ChrI	22805147	22805601
ChrI	22809670	22811060
ChrI	22815949	22816147
ChrI	22842819	22844970
ChrI	22846849	22847937
ChrI	22863211	22863643
ChrI	22867379	22868846
ChrI	22874571	22876073
ChrI	22876988	22877931
ChrI	22884747	22885382
ChrI	22891864	22892056
ChrI	22918260	22922920
ChrI	22923675	22923877
ChrI	22927343	22927748
ChrI	22933213	22933478
ChrI	22943971	22944230
ChrI	22945225	22947207
ChrI	23083864	23084262
ChrI	23114445	23116675
ChrI	23120257	23121823
ChrI	23126044	23126315
ChrI	23191501	23192590
ChrI	23208301	23209003
ChrI	23220800	23221780
ChrI	23233914	23238574
ChrI	23244089	23244899
ChrI	23247843	23248095
ChrI	23254404	23255671
ChrI	23256532	23257368
ChrI	23363697	23365407
ChrI	23434461	23436296
ChrI	23473010	23476138
ChrI	23484000	23484325
ChrI	23546724	23547236
ChrI	23547920	23548783
ChrI	23644714	23647637
ChrI	23690611	23692233
ChrI	23694662	23697157
ChrI	23712097	23713806
ChrI	23781678	23782129
ChrI	23803001	23803522
ChrI	23806712	23811018
ChrI	23861516	23861727
ChrI	23869957	23870705
ChrI	23871454	23874578
ChrI	23877502	23878411
ChrI	23936720	23937481
ChrI	23985294	23986104
ChrI	24072935	24073869
ChrI	24080862	24081121
ChrI	24159494	24160991
ChrI	24161739	24162014
ChrI	24206017	24206659
ChrI	24217229	24219807
ChrI	24263467	24264662
ChrI	24323042	24325964
ChrI	24327344	24328920
ChrI	24329683	24330647
ChrI	24338909	24339091
ChrI	24623828	24624203
ChrI	24692452	24693520
ChrI	24696359	24703998
ChrI	24713060	24715948
ChrI	24716738	24717057
ChrI	24717982	24719551
ChrI	24726463	24727040
ChrI	24779810	24784921
ChrI	24804179	24806272
ChrI	24855161	24855408
ChrI	24864603	24868253
ChrI	24873410	24874011
ChrI	24913151	24914208
ChrI	24919610	24919846
ChrI	24975161	24975931
ChrI	25018482	25021561
ChrI	25193186	25194264
ChrI	25196722	25196915
ChrI	25247614	25248119
ChrI	25248872	25249796
ChrI	25251336	25254907
ChrI	25255663	25259053
ChrI	25262998	25264418
ChrI	25330311	25333243
ChrI	25333977	25334189
ChrI	25357689	25358308
ChrI	25364385	25364739
ChrI	25365932	25368798
ChrI	25469400	25471916
ChrI	25527241	25527970
ChrI	25582170	25582353
ChrI	25651142	25651903
ChrI	25652638	25655772
ChrI	25687698	25688076
ChrI	25690496	25690675
ChrI	25693017	25693931
ChrI	25701136	25701418
ChrI	25717805	25718759
ChrI	25775423	25776187
ChrI	25791309	25792522
ChrI	25815511	25818390
ChrI	25821607	25823035
ChrI	25831404	25832372
ChrI	25833262	25840899
ChrI	25882816	25884491
ChrI	25910759	25910939
ChrI	26274997	26279397
ChrI	26369164	26371282
ChrI	26384425	26386020
ChrI	26502299	26505746
ChrI	26534961	26535830
ChrI	26588758	26589099
ChrI	26655405	26656079
ChrI	26716095	26717320
ChrI	26781156	26783290
ChrI	26789820	26790663
ChrI	26801909	26802514
ChrI	26804035	26804565
ChrI	26855714	26856105
ChrI	26900977	26902024
ChrI	26902968	26904075
ChrI	26922450	26923417
ChrI	26948571	26949626
ChrI	26999028	27000459
ChrI	27021611	27021795
ChrI	27042384	27044840
ChrI	27063816	27064568
ChrI	27096377	27097375
ChrI	27107306	27112479
ChrI	27323730	27328170
ChrI	27328967	27330211
ChrI	27425689	27427585
ChrI	27504183	27504865
ChrI	27505539	27506313
ChrI	27716231	27717410
ChrI	27728702	27730175
ChrI	27731025	27731867
ChrI	27732655	27735479
ChrI	27740435	27742430
ChrI	27781115	27781810
ChrI	27802053	27804325
ChrI	27820339	27820995
ChrI	27891996	27892627
ChrI	27903241	27909651
ChrI	27921995	27923311
ChrI	27975999	27976371
ChrI	28055918	28058190
ChrI	28105442	28107917
ChrI	28139166	28146238
ChrI	28183553	28184181
ChrI	28283557	28285274
ChrI	28352191	28353185
ChrI	28354497	28355242
ChrI	28612884	28613547
ChrI	28628246	28629539
ChrI	28807391	28810190
ChrI	28854706	28854960
ChrI	28933211	28934082
ChrI	29019862	29020082
ChrI	29166765	29169059
ChrI	29217956	29218231
ChrI	29490992	29491155
ChrI	29589996	29592284
ChrI	29647944	29649144
ChrI	29677455	29677978
ChrI	29886441	29888366
ChrI	30162922	30163864
ChrI	30164997	30166669
ChrI	30167323	30171766
ChrI	30308426	30309639
ChrI	30345005	30346098
ChrI	30346780	30347142
ChrI	30372991	30373268
ChrI	30384509	30384748
ChrI	30595433	30595640
ChrI	30599324	30600184
ChrI	30997464	30997657
ChrI	31215416	31215852
ChrI	31224553	31225628
ChrI	31341882	31342739
ChrI	31345840	31354429
ChrI	31359349	31359570
ChrI	31368085	31368700
ChrI	31400088	31400563
ChrI	31551822	31552272
ChrI	31561676	31562103
ChrI	31636357	31636538
ChrI	31902204	31906970
ChrI	32060356	32060934
ChrI	32061626	32062593
ChrI	32120012	32120188
ChrI	32393010	32394060
ChrI	32457448	32466003
ChrI	32590766	32593877
ChrI	32700328	32703076
ChrI	32782711	32783620
ChrI	32819642	32819832
ChrI	32823885	32826087
ChrI	32857743	32858063
ChrI	32949966	32952051
ChrI	33164960	33165520
ChrI	33237451	33237658
ChrI	33286003	33287371
ChrI	33335619	33335812
ChrI	33475351	33498970
ChrI	33523117	33523935
ChrI	33542622	33543579
ChrI	33584834	33585905
ChrI	33606295	33606476
ChrI	33611239	33613344
ChrI	33789836	33790600
ChrI	33821959	33822129
ChrI	33865345	33865773
ChrI	33925217	33926077
ChrI	34069528	34074386
ChrI	34161122	34161532
ChrI	34199514	34201300
ChrI	34217432	34218075
ChrI	34270554	34271010
ChrI	34301824	34306009
ChrI	34307432	34308017
ChrI	34313213	34313537
ChrI	34321736	34323929
ChrI	34352194	34352359
ChrI	34478901	34479730
ChrI	34480523	34483800
ChrI	34495466	34497818
ChrI	34514013	34517521
ChrI	34644081	34645521
ChrI	34821691	34824170
ChrI	34825091	34828213
ChrI	34832990	34833479
ChrI	34987749	34988572
ChrI	34994338	34996537
ChrI	35003611	35004428
ChrI	35005633	35009990
ChrI	35084265	35084976
ChrI	35129670	35130302
ChrI	35174224	35175533
ChrI	35218795	35221338
ChrI	35327510	35327939
ChrI	35331983	35332876
ChrI	35472596	35473019
ChrI	35538607	35539013
ChrI	35676368	35681702
ChrI	35838435	35842980
ChrI	35976991	35978485
ChrI	36080896	36081203
ChrI	36084206	36084452
ChrI	36085410	36086813
ChrI	36088373	36090070
ChrI	36217579	36222698
ChrI	36242026	36243912
ChrI	36345934	36349442
ChrI	36376887	36377140
ChrI	36386337	36386882
ChrI	36451837	36454949
ChrI	36497021	36498463
ChrI	36584134	36584319
ChrI	36642537	36642989
ChrI	36864021	36864265
ChrI	36879585	36880968
ChrI	36887457	36888875
ChrI	36890103	36890676
ChrI	36892720	36893421
ChrI	36895490	36896466
ChrI	36897928	36900375
ChrI	36901316	36904803
ChrI	36905538	36906720
ChrI	36907480	36907669
ChrI	36908389	36909070
ChrI	36909978	36911439
ChrI	36927209	36928317
ChrI	36930419	36931243
ChrI	36933308	36934236
ChrI	36934918	36936881
ChrI	36937742	36938849
ChrI	36943197	36943606
ChrI	36945683	36946358
ChrI	36953090	36953651
ChrI	36954320	36954512
ChrI	36955556	36956107
ChrI	36956756	36957520
ChrI	36962214	36965209
ChrI	36970716	36971680
ChrI	36975599	36976493
ChrI	36977542	36977847
ChrI	36978863	36979154
ChrI	36979828	36980185
ChrI	36981141	36981606
ChrI	36986874	36987652
ChrI	36990057	36990739
ChrI	36993576	36994564
ChrI	36995891	36996457
ChrI	36997645	36998217
ChrI	37001543	37005414
ChrI	37008065	37008261
ChrI	37009616	37010495
ChrI	37014654	37015305
ChrI	37015972	37016682
ChrI	37020348	37021473
ChrI	37036826	37038146
ChrI	37047298	37048255
ChrI	37052947	37053361
ChrI	37057883	37058765
ChrI	37064205	37066879
ChrI	37074793	37075779
ChrI	37106773	37107370
ChrI	37122114	37122914
ChrI	37136074	37137983
ChrI	37140611	37141104
ChrI	37156101	37156359
ChrI	37158039	37159136
ChrI	37177743	37178454
ChrI	37179139	37179709
ChrI	37180607	37182078
ChrI	37195466	37197299
ChrI	37198100	37199546
ChrI	37200419	37201649
ChrI	37202713	37203370
ChrI	37204190	37205345
ChrI	37215966	37216540
ChrI	37218595	37219435
ChrI	37238978	37239502
ChrI	37274532	37281514
ChrI	37291780	37292267
ChrI	37316836	37321344
ChrI	37330712	37331380
ChrI	37333697	37336017
ChrI	37345220	37345991
ChrI	37383613	37384835
ChrI	37385733	37386162
ChrI	37501705	37503136
ChrI	37558537	37558751
ChrI	37559743	37560076
ChrI	37592073	37592672
ChrI	37610414	37622704
ChrI	37723657	37725660
ChrI	37824875	37828892
ChrI	38044260	38050918
ChrI	38064032	38064956
ChrI	38089411	38090052
ChrI	38091266	38092174
ChrI	38114348	38115691
ChrI	38117050	38117353
ChrI	38120428	38121540
ChrI	38203684	38204629
ChrI	38205323	38206777
ChrI	38229131	38233703
ChrI	38234536	38235460
ChrI	38365899	38366717
ChrI	38411659	38412213
ChrI	38418237	38419211
ChrI	38438481	38443654
ChrI	38509747	38510275
ChrI	38521270	38521799
ChrI	38585027	38586342
ChrI	38590382	38591061
ChrI	38616135	38621461
ChrI	38634765	38637067
ChrI	38697768	38699421
ChrI	38751174	38757477
ChrI	38768142	38768614
ChrI	38769630	38770259
ChrI	38821268	38824763
ChrI	38825856	38827201
ChrI	38827870	38838471
ChrI	39071991	39072290
ChrI	39206210	39206384
ChrI	39231435	39231856
ChrI	39326043	39332066
ChrI	39354788	39361219
ChrI	39398311	39401129
ChrI	39401814	39403003
ChrI	39433906	39434475
ChrI	39546743	39556042
ChrII	98	9584
ChrII	40616	43373
ChrII	61946	64897
ChrII	173237	173564
ChrII	205800	207171
ChrII	207842	208864
ChrII	251824	252116
ChrII	273128	273299
ChrII	281790	284870
ChrII	330303	330579
ChrII	503814	504316
ChrII	521902	522256
ChrII	641594	642727
ChrII	645589	646209
ChrII	646867	648331
ChrII	651298	651683
ChrII	667159	667343
ChrII	712005	712304
ChrII	731314	733883
ChrII	734709	738297
ChrII	742653	747246
ChrII	748901	750007
ChrII	750887	751166
ChrII	751997	752352
ChrII	753455	754527
ChrII	770665	771144
ChrII	771905	774900
ChrII	775605	776800
ChrII	777797	778261
ChrII	813332	813844
ChrII	838538	843996
ChrII	846689	846946
ChrII	872087	872427
ChrII	879816	884777
ChrII	891882	892390
ChrII	899058	900495
ChrII	901777	902851
ChrII	903896	904467
ChrII	905153	905699
ChrII	912334	912503
ChrII	922137	923118
ChrII	935816	936199
ChrII	961028	961891
ChrII	1093900	1094120
ChrII	1094907	1096354
ChrII	1110043	1110423
ChrII	1144884	1145524
ChrII	1164506	1164751
ChrII	1165572	1168694
ChrII	1169426	1170878
ChrII	1176545	1176793
ChrII	1195781	1196264
ChrII	1275153	1275341
ChrII	1301305	1302097
ChrII	1302817	1304145
ChrII	1312172	1312938
ChrII	1318754	1319475
ChrII	1320612	1321755
ChrII	1324384	1325971
ChrII	1340311	1340982
ChrII	1343942	1344134
ChrII	1354812	1355647
ChrII	1378098	1378540
ChrII	1415625	1417623
ChrII	1418778	1418995
ChrII	1556906	1557251
ChrII	1559629	1560674
ChrII	1561516	1564234
ChrII	1565003	1565238
ChrII	1569596	1570392
ChrII	1600802	1601477
ChrII	1606030	1612900
ChrII	1634762	1635714
ChrII	1646384	1646665
ChrII	1648231	1648472
ChrII	1649266	1652921
ChrII	1692559	1693035
ChrII	1742779	1743280
ChrII	1760921	1761134
ChrII	1820505	1822978
ChrII	1825059	1825619
ChrII	1835534	1835784
ChrII	1836483	1837412
ChrII	1880821	1881249
ChrII	1885696	1887951
ChrII	1890286	1890909
ChrII	2095149	2097030
ChrII	2103885	2107409
ChrII	2137869	2139934
ChrII	2142450	2144165
ChrII	2146829	2147723
ChrII	2148840	2152449
ChrII	2153311	2154479
ChrII	2155245	2161438
ChrII	2168899	2170377
ChrII	2175031	2175228
ChrII	2197469	2199229
ChrII	2200222	2201103
ChrII	2202623	2203690
ChrII	2210249	2210978
ChrII	2219296	2219931
ChrII	2233921	2234274
ChrII	2241180	2242051
ChrII	2242910	2243251
ChrII	2244805	2245225
ChrII	2254611	2255892
ChrII	2260026	2260220
ChrII	2265604	2266284
ChrII	2269073	2269707
ChrII	2272220	2273181
ChrII	2278471	2278694
ChrII	2281660	2282167
ChrII	2299387	2299725
ChrII	2302880	2303584
ChrII	2343264	2350079
ChrII	2357577	2358902
ChrII	2360023	2361058
ChrII	2365076	2366348
ChrII	2367338	2367768
ChrII	2424852	2425215
ChrII	2428603	2429091
ChrII	2429826	2430162
ChrII	2430822	2431814
ChrII	2432667	2435937
ChrII	2444189	2444734
ChrII	2491621	2491986
ChrII	2493044	2493977
ChrII	2494748	2495403
ChrII	2496468	2496849
ChrII	2501637	2504831
ChrII	2527372	2527592
ChrII	2562576	2566654
ChrII	2570752	2571208
ChrII	2573139	2573361
ChrII	2579994	2580480
ChrII	2586330	2589692
ChrII	2596277	2597519
ChrII	2642057	2642677
ChrII	2698005	2702356
ChrII	2783111	2784553
ChrII	2802816	2803544
ChrII	2810354	2810565
ChrII	2824768	2826342
ChrII	2880116	2882012
ChrII	2884370	2884885
ChrII	2893077	2895268
ChrII	2906285	2906605
ChrII	2907400	2909946
ChrII	2917017	2918322
ChrII	2922316	2922675
ChrII	2925488	2927159
ChrII	2935022	2935470
ChrII	2942283	2945493
ChrII	2946912	2947699
ChrII	2952603	2953177
ChrII	2956197	2956451
ChrII	2960681	2961024
ChrII	2964000	2964384
ChrII	2967021	2968736
ChrII	2988309	2990090
ChrII	2998012	2998191
ChrII	3012214	3014488
ChrII	3015947	3016353
ChrII	3030628	3032395
ChrII	3056561	3057863
ChrII	3080358	3082200
ChrII	3084301	3085444
ChrII	3094821	3095394
ChrII	3100139	3100504
ChrII	3115161	3116987
ChrII	3137230	3139580
ChrII	3181047	3181734
ChrII	3213146	3213856
ChrII	3232135	3233401
ChrII	3248053	3248226
ChrII	3274049	3274638
ChrII	3275319	3278534
ChrII	3279423	3280324
ChrII	3295742	3297791
ChrII	3346960	3347930
ChrII	3379601	3379915
ChrII	3387183	3388751
ChrII	3391594	3392411
ChrII	3393330	3397729
ChrII	3403155	3403966
ChrII	3405194	3406320
ChrII	3425895	3426370
ChrII	3447031	3447701
ChrII	3467066	3469149
ChrII	3476099	3484337
ChrII	3526611	3527114
ChrII	3530395	3531137
ChrII	3600499	3601373
ChrII	3612386	3613015
ChrII	3613722	3615080
ChrII	3615779	3616661
ChrII	3617553	3619207
ChrII	3635559	3635737
ChrII	3660339	3660545
ChrII	3665868	3668154
ChrII	3693323	3693846
ChrII	3751819	3752757
ChrII	3765956	3766570
ChrII	3776627	3776886
ChrII	3854292	3856020
ChrII	3857255	3858680
ChrII	3861297	3861513
ChrII	3863048	3864444
ChrII	3866807	3867167
ChrII	3870207	3870652
ChrII	3878796	3880550
ChrII	3953003	3953832
ChrII	3955499	3957126
ChrII	3958610	3959775
ChrII	3976516	3976891
ChrII	3981687	3983532
ChrII	4016159	4019693
ChrII	4024361	4025833
ChrII	4026672	4027495
ChrII	4155590	4156642
ChrII	4166584	4167140
ChrII	4180755	4184194
ChrII	4212655	4212835
ChrII	4271653	4272913
ChrII	4292073	4292724
ChrII	4295666	4297611
ChrII	4302106	4302707
ChrII	4313479	4313885
ChrII	4355613	4356105
ChrII	4366114	4366858
ChrII	4372064	4372560
ChrII	4373234	4373873
ChrII	4379917	4381154
ChrII	4388251	4388561
ChrII	4398272	4399759
ChrII	4402371	4403546
ChrII	4405568	4406016
ChrII	4409418	4409862
ChrII	4415548	4416225
ChrII	4418482	4419129
ChrII	4437333	4437780
ChrII	4448674	4449713
ChrII	4514553	4514892
ChrII	4515686	4520357
ChrII	4521432	4521811
ChrII	4530963	4533271
ChrII	4534078	4535055
ChrII	4536201	4536853
ChrII	4548537	4551525
ChrII	4553984	4556352
ChrII	4558384	4558901
ChrII	4566496	4567557
ChrII	4568684	4569262
ChrII	4570001	4574075
ChrII	4574899	4576607
ChrII	4578825	4579639
ChrII	4580496	4586359
ChrII	4587436	4587778
ChrII	4589386	4590952
ChrII	4630362	4633358
ChrII	4636286	4636769
ChrII	4639844	4640342
ChrII	4643894	4644891
ChrII	4665666	4667365
ChrII	4698767	4699205
ChrII	4706761	4707387
ChrII	4711747	4712118
ChrII	4713820	4715474
ChrII	4716622	4717261
ChrII	4719371	4720512
ChrII	4721279	4722296
ChrII	4775141	4778154
ChrII	4780858	4781131
ChrII	4822021	4822545
ChrII	4906693	4906915
ChrII	4985769	4987437
ChrII	5022620	5049075
ChrII	5049775	5060967
ChrII	5063500	5065680
ChrII	5067419	5067728
ChrII	5069238	5069495
ChrII	5074228	5075024
ChrII	5091934	5092598
ChrII	5167914	5169795
ChrII	5173601	5174499
ChrII	5185902	5187686
ChrII	5207876	5209639
ChrII	5219976	5221010
ChrII	5232721	5236477
ChrII	5246072	5249310
ChrII	5250265	5253669
ChrII	5298234	5303553
ChrII	5316862	5323012
ChrII	5324001	5324330
ChrII	5329986	5334871
ChrII	5353001	5353742
ChrII	5363713	5368839
ChrII	5437189	5438968
ChrII	5443780	5445169
ChrII	5446408	5447194
ChrII	5480265	5480536
ChrII	5519357	5519519
ChrII	5537548	5538473
ChrII	5549755	5550583
ChrII	5553943	5556961
ChrII	5557803	5558531
ChrII	5698068	5699167
ChrII	5700652	5702311
ChrII	5726892	5727374
ChrII	5735653	5738351
ChrII	5740267	5740470
ChrII	5748023	5748935
ChrII	5787925	5788266
ChrII	5804899	5805624
ChrII	5806659	5807557
ChrII	5808556	5810656
ChrII	5858137	5858783
ChrII	5866528	5867276
ChrII	5868259	5869294
ChrII	5871024	5871873
ChrII	5873856	5874498
ChrII	5887850	5888108
ChrII	5917273	5917442
ChrII	5963235	5964127
ChrII	5996924	5997313
ChrII	6025467	6025863
ChrII	6100045	6100594
ChrII	6196433	6203456
ChrII	6221150	6222369
ChrII	6299276	6307323
ChrII	6345126	6345639
ChrII	6346500	6353087
ChrII	6396131	6397497
ChrII	6566369	6568847
ChrII	6570140	6570738
ChrII	6646373	6649401
ChrII	6732986	6733394
ChrII	6763891	6764417
ChrII	6765245	6766301
ChrII	6969946	6971891
ChrII	7030980	7034205
ChrII	7094311	7094982
ChrII	7101659	7101833
ChrII	7156701	7157038
ChrII	7158291	7159655
ChrII	7250070	7250456
ChrII	7251130	7253097
ChrII	7308107	7316767
ChrII	7325361	7329609
ChrII	7334462	7335894
ChrII	7339575	7339863
ChrII	7366697	7367630
ChrII	7377757	7377938
ChrII	7404456	7406376
ChrII	7420503	7423972
ChrII	7433781	7435975
ChrII	7487885	7490023
ChrII	7509382	7513215
ChrII	7515628	7515810
ChrII	7650474	7657973
ChrII	7659043	7666666
ChrII	7715618	7716484
ChrII	7719778	7720137
ChrII	7743736	7744254
ChrII	7750226	7751835
ChrII	7756220	7756500
ChrII	7759987	7761627
ChrII	7770167	7774281
ChrII	7812174	7816214
ChrII	7865886	7866172
ChrII	7902718	7903072
ChrII	8114436	8115014
ChrII	8167912	8168862
ChrII	8508643	8511383
ChrII	8520846	8523294
ChrII	8524147	8525305
ChrII	8526118	8527369
ChrII	8528293	8529125
ChrII	8534210	8538403
ChrII	8545134	8545424
ChrII	8669316	8673449
ChrII	8675690	8675944
ChrII	8807893	8808105
ChrII	8826579	8827552
ChrII	8996649	8996919
ChrII	9023759	9024949
ChrII	9028375	9029325
ChrII	9048486	9049313
ChrII	9214915	9215630
ChrII	9216341	9219247
ChrII	9221949	9223224
ChrII	9226608	9227781
ChrII	9489169	9489558
ChrII	9643963	9645155
ChrII	9646009	9648136
ChrII	9649461	9650358
ChrII	9656998	9658170
ChrII	9660337	9660540
ChrII	9695854	9696695
ChrII	9789709	9790309
ChrII	9812025	9812680
ChrII	9813701	9814318
ChrII	10003694	10005016
ChrII	10005767	10010133
ChrII	10119499	10120204
ChrII	10220082	10220428
ChrII	10256645	10257409
ChrII	10277684	10277988
ChrII	10295392	10295664
ChrII	10302719	10303175
ChrII	10412309	10413802
ChrII	10469832	10471582
ChrII	10509163	10509453
ChrII	10541537	10542754
ChrII	10580587	10581559
ChrII	10586212	10586389
ChrII	10597760	10598740
ChrII	10623408	10623801
ChrII	10688946	10689293
ChrII	10983190	10986477
ChrII	11031213	11031751
ChrII	11096192	11103440
ChrII	11117446	11117989
ChrII	11224432	11224716
ChrII	11236638	11237810
ChrII	11354429	11354955
ChrII	11396433	11400959
ChrII	11531690	11532301
ChrII	11588879	11589127
ChrII	11619788	11622314
ChrII	12394182	12394491
ChrII	12408027	12408622
ChrII	12424851	12425029
ChrII	12562979	12563365
ChrII	12680552	12680983
ChrII	12686951	12688382
ChrII	12754210	12755697
ChrII	12765842	12766221
ChrII	12787445	12787622
ChrII	12967951	12968769
ChrII	12973903	12974329
ChrII	12989403	12990580
ChrII	13019450	13021736
ChrII	13022660	13029504
ChrII	13033079	13033510
ChrII	13034794	13034998
ChrII	13091661	13091879
ChrII	13093636	13094786
ChrII	13096940	13097196
ChrII	13100503	13100799
ChrII	13101745	13104600
ChrII	13254268	13258770
ChrII	13260390	13261530
ChrII	13264913	13267032
ChrII	13359910	13360340
ChrII	13457649	13458825
ChrII	13504901	13506296
ChrII	13690259	13690843
ChrII	13694357	13694838
ChrII	13695970	13696530
ChrII	13731977	13733062
ChrII	13811977	13812452
ChrII	13828208	13828503
ChrII	13956265	13964063
ChrII	13964725	13965586
ChrII	13974237	13976288
ChrII	14007671	14008282
ChrII	14131548	14132015
ChrII	14132884	14133211
ChrII	14137686	14138091
ChrII	14139009	14142285
ChrII	14172608	14172941
ChrII	14241397	14241759
ChrII	14243130	14247347
ChrII	14248439	14250263
ChrII	14250921	14251094
ChrII	14252126	14252610
ChrII	14255974	14257215
ChrII	14257951	14258334
ChrII	14259648	14262272
ChrII	14263843	14264405
ChrII	14312896	14314873
ChrII	14552243	14552785
ChrII	14602819	14604771
ChrII	14605805	14607013
ChrII	14607782	14610080
ChrII	14702656	14702926
ChrII	14710546	14711068
ChrII	14712085	14742036
ChrII	14742920	14743878
ChrII	14830438	14832709
ChrII	14841736	14843899
ChrII	14844709	14844875
ChrII	14851901	14854708
ChrII	14882597	14883176
ChrII	14886447	14887502
ChrII	14897842	14899179
ChrII	14923343	14952316
ChrII	14994017	14994334
ChrII	14994988	15022207
ChrII	15023140	15034785
ChrII	15039937	15042337
ChrII	15043350	15053790
ChrII	15059337	15062904
ChrII	15063841	15064266
ChrII	15064930	15065343
ChrII	15073246	15074353
ChrII	15075192	15076176
ChrII	15076937	15077430
ChrII	15086020	15087093
ChrII	15110859	15111388
ChrII	15112960	15114751
ChrII	15165580	15167001
ChrII	15181060	15181543
ChrII	15195012	15195225
ChrII	15198514	15199847
ChrII	15201004	15202124
ChrII	15212637	15213372
ChrII	15215525	15217426
ChrII	15399746	15400071
ChrII	15414243	15414491
ChrII	15417795	15418166
ChrII	15418926	15419561
ChrII	15586586	15587098
ChrII	15697028	15698258
ChrII	15700552	15702342
ChrII	15770068	15771418
ChrII	15886450	15886757
ChrII	15891316	15891879
ChrII	15947351	15948851
ChrII	15982159	15982608
ChrII	16030925	16036206
ChrII	16053173	16054066
ChrII	16063258	16065090
ChrII	16065924	16066266
ChrII	16096233	16099516
ChrII	16219228	16219539
ChrII	16220211	16220995
ChrII	16221749	16222349
ChrII	16300961	16302310
ChrII	16328347	16330599
ChrII	16341164	16341525
ChrII	16369493	16371111
ChrII	16372508	16374684
ChrII	16376409	16377189
ChrII	16451390	16454835
ChrII	16480446	16481094
ChrII	16492982	16493926
ChrII	16497723	16497966
ChrII	16585402	16585585
ChrII	16697399	16699264
ChrII	16828393	16829168
ChrII	16831116	16832551
ChrII	16833700	16834161
ChrII	16842415	16844344
ChrII	16962257	16970106
ChrII	16978720	16980459
ChrII	16997347	16997582
ChrII	17004784	17005739
ChrII	17018551	17018790
ChrII	17021299	17022472
ChrII	17025607	17026235
ChrII	17057672	17058215
ChrII	17069640	17070547
ChrII	17115858	17116577
ChrII	17134233	17137151
ChrII	17138607	17139208
ChrII	17178941	17179621
ChrII	17184331	17185117
ChrII	17290551	17291775
ChrII	17325022	17325624
ChrII	17342082	17342845
ChrII	17379887	17380142
ChrII	17381519	17382286
ChrII	17382953	17383174
ChrII	17392971	17394764
ChrII	17479232	17483211
ChrII	17490675	17493196
ChrII	17494963	17495395
ChrII	17577541	17578408
ChrII	17642314	17642732
ChrII	17652061	17652518
ChrII	17678574	17680032
ChrII	17700136	17700776
ChrII	17708221	17721283
ChrII	17758920	17759348
ChrII	17760113	17760486
ChrII	17777913	17778872
ChrII	17795329	17799174
ChrII	17803940	17807001
ChrII	17817722	17823931
ChrII	17826091	17829219
ChrII	17831166	17831512
ChrII	17832454	17832966
ChrII	17845482	17845661
ChrII	17846532	17848245
ChrII	17849775	17852217
ChrII	17852874	17855518
ChrII	17857294	17857466
ChrII	17863383	17865083
ChrII	17877376	17877941
ChrII	17933872	17935774
ChrII	18044277	18045067
ChrII	18045884	18051233
ChrII	18054047	18055138
ChrII	18058992	18060330
ChrII	18093340	18093563
ChrII	18160800	18161316
ChrII	18165169	18165514
ChrII	18198024	18199312
ChrII	18243505	18244383
ChrII	18265254	18265878
ChrII	18266677	18266923
ChrII	18275793	18276740
ChrII	18278442	18279984
ChrII	18288108	18288627
ChrII	18289643	18292654
ChrII	18301877	18303698
ChrII	18378756	18379559
ChrII	18396923	18397628
ChrII	18463994	18465549
ChrII	18468875	18469837
ChrII	18470898	18471099
ChrII	18500772	18502318
ChrII	18537414	18539156
ChrII	18539971	18540163
ChrII	18545856	18546779
ChrII	18551936	18559611
ChrII	18572528	18574485
ChrII	18583853	18584519
ChrII	18585919	18587336
ChrII	18619706	18624295
ChrII	18626533	18626900
ChrII	18627800	18629362
ChrII	18643087	18644819
ChrII	18744387	18744610
ChrII	18769629	18770330
ChrII	18842507	18842839
ChrII	18855584	18855879
ChrII	18859458	18860314
ChrII	18861262	18861973
ChrII	18920719	18921284
ChrII	18924290	18924712
ChrII	18931077	18931992
ChrII	18970239	18971774
ChrII	18974056	18976759
ChrII	19007858	19008947
ChrII	19041783	19044285
ChrII	19049555	19049730
ChrII	19094992	19095391
ChrII	19104522	19105106
ChrII	19115406	19116097
ChrII	19164461	19164955
ChrII	19166843	19170444
ChrII	19171466	19177528
ChrII	19178249	19181887
ChrII	19188665	19188827
ChrII	19192796	19195586
ChrII	19206381	19206757
ChrII	19276001	19276291
ChrII	19291991	19292224
ChrII	19379625	19379816
ChrII	19381690	19382539
ChrII	19384425	19386926
ChrII	19397604	19397988
ChrII	19408786	19413651
ChrII	19414796	19421118
ChrII	19467271	19473824
ChrII	19477623	19478814
ChrII	19480131	19483563
ChrII	19484644	19487074
ChrII	19489928	19490188
ChrII	19493230	19494234
ChrII	19496363	19496995
ChrII	19500285	19500700
ChrII	19503637	19503852
ChrII	19504960	19505138
ChrII	19513097	19513273
ChrII	19514066	19514237
ChrII	19515394	19515562
ChrII	19522219	19523140
ChrII	19575035	19575961
ChrII	19578115	19582425
ChrII	19587585	19588037
ChrII	19589261	19591972
ChrII	19596786	19598035
ChrII	19610498	19611420
ChrII	19636235	19637622
ChrII	19639388	19641779
ChrII	19674312	19675642
ChrII	19677740	19678288
ChrII	19694759	19695738
ChrII	19717125	19718365
ChrII	19741037	19743240
ChrII	19744247	19745138
ChrII	19747399	19748161
ChrII	19751047	19752751
ChrII	19755136	19755363
ChrII	19763159	19764157
ChrII	19770637	19771406
ChrII	19775063	19776049
ChrII	19786820	19787721
ChrII	19790210	19792515
ChrII	19793621	19794830
ChrII	19804686	19805226
ChrII	19808289	19809776
ChrII	19815183	19815698
ChrII	19816675	19817411
ChrII	19823183	19823842
ChrII	19825484	19825790
ChrII	19834217	19836878
ChrII	19839887	19842108
ChrII	19843081	19843246
ChrII	19847793	19848024
ChrII	19873259	19874898
ChrII	19888280	19891904
ChrII	19894678	19895431
ChrII	19906813	19908606
ChrII	19913222	19913750
ChrII	19914632	19914845
ChrII	19944283	19947991
ChrII	19958980	19959223
ChrII	19979189	19981685
ChrII	19983281	19984037
ChrII	19984769	19985565
ChrII	19986234	19986826
ChrII	19987670	19987834
ChrII	19989506	19989803
ChrII	19990827	19991262
ChrII	19993364	20000555
ChrII	20003415	20004278
ChrII	20005465	20005738
ChrII	20007102	20007448
ChrII	20008157	20012734
ChrII	20013437	20017786
ChrII	20018665	20036023
ChrII	20037411	20037638
ChrII	20038331	20040869
ChrII	20042169	20042718
ChrII	20046809	20047461
ChrII	20062161	20062863
ChrII	20063959	20064569
ChrII	20067809	20068039
ChrII	20070858	20071054
ChrII	20078648	20079220
ChrII	20080118	20083418
ChrII	20084228	20088030
ChrII	20088737	20089080
ChrII	20090162	20091982
ChrII	20102737	20103382
ChrII	20104096	20104409
ChrII	20119339	20119600
ChrII	20124428	20126660
ChrII	20135893	20140322
ChrII	20143619	20145404
ChrII	20146317	20146553
ChrII	20148834	20150000
ChrII	20155328	20157725
ChrII	20158615	20159102
ChrII	20177195	20177475
ChrII	20178314	20179275
ChrII	20227234	20228311
ChrII	20233495	20234250
ChrII	20247504	20248103
ChrII	20261351	20261567
ChrII	20263600	20263892
ChrII	20266003	20266840
ChrII	20267680	20268928
ChrII	20270020	20276613
ChrII	20288416	20288850
ChrII	20299954	20300635
ChrII	20320144	20320383
ChrII	20342026	20343661
ChrII	20346716	20348144
ChrII	20352833	20353128
ChrII	20353889	20355406
ChrII	20367709	20369864
ChrII	20371480	20372554
ChrII	20467037	20467582
ChrII	20478575	20480868
ChrII	20481910	20483882
ChrII	20485131	20486004
ChrII	20499656	20500597
ChrII	20508600	20511084
ChrII	20575301	20576032
ChrII	20585621	20586351
ChrII	20596459	20597191
ChrII	20602236	20602791
ChrII	20615857	20616500
ChrII	20643770	20644775
ChrII	20663111	20668023
ChrII	20668925	20670179
ChrII	20677844	20678893
ChrII	20692726	20696441
ChrII	20697666	20698380
ChrII	20716774	20717589
ChrII	20725971	20726579
ChrII	20735973	20738982
ChrII	20777529	20780840
ChrII	20781649	20782676
ChrII	20786705	20789845
ChrII	20793405	20793961
ChrII	20819496	20819763
ChrII	20826811	20828222
ChrII	20841432	20842777
ChrII	20846184	20846856
ChrII	20886935	20889639
ChrII	20894960	20895357
ChrII	20896546	20897402
ChrII	20903813	20904082
ChrII	20912336	20913077
ChrII	20917023	20918866
ChrII	20919705	20920239
ChrII	20929304	20930443
ChrII	20961761	20965579
ChrII	20966247	20967044
ChrII	20976711	20978495
ChrII	20979948	20980458
ChrII	20981189	20982108
ChrII	20982865	20986093
ChrII	20986796	20987619
ChrII	20991723	20992818
ChrII	20994316	21000416
ChrII	21002266	21003574
ChrII	21021679	21021884
ChrII	21059825	21061919
ChrII	21066631	21069101
ChrII	21084449	21085715
ChrII	21096649	21097432
ChrII	21124761	21125791
ChrII	21133622	21135610
ChrII	21138338	21143299
ChrII	21158499	21159654
ChrII	21175171	21176736
ChrII	21183676	21185656
ChrII	21207878	21208480
ChrII	21209514	21213065
ChrII	21260266	21261164
ChrII	21375763	21376623
ChrII	21399253	21402195
ChrII	21410695	21410908
ChrII	21426029	21426707
ChrII	21466091	21466725
ChrII	21512760	21513152
ChrII	21571383	21571712
ChrII	21573832	21575000
ChrII	21578144	21578425
ChrII	21581568	21582000
ChrII	21584114	21585939
ChrII	21697586	21698590
ChrII	21717611	21718954
ChrII	21726813	21728840
ChrII	21729774	21731473
ChrII	21744047	21746259
ChrII	21753936	21754207
ChrII	21778915	21787186
ChrII	21788349	21788562
ChrII	21789458	21790797
ChrII	21796840	21797988
ChrII	21803687	21804296
ChrII	21808018	21811698
ChrII	21840716	21844156
ChrII	21848828	21849768
ChrII	21852524	21854726
ChrII	21944756	21944944
ChrII	21945868	21946050
ChrII	21947802	21948406
ChrII	21949228	21949744
ChrII	21951110	21952842
ChrII	21960864	21961355
ChrII	21962132	21962568
ChrII	21980071	21980361
ChrII	22022979	22023615
ChrII	22047093	22052822
ChrII	22124426	22125423
ChrII	22138665	22141178
ChrII	22152787	22153581
ChrII	22186430	22186742
ChrII	22190127	22192116
ChrII	22201503	22202846
ChrII	22203664	22203845
ChrII	22257777	22258023
ChrII	22320779	22324046
ChrII	22324839	22325939
ChrII	22407937	22408984
ChrII	22432258	22432540
ChrII	22649059	22650354
ChrII	22657084	22658416
ChrII	22661356	22661806
ChrII	22662458	22663500
ChrII	22668894	22669233
ChrII	22669970	22670151
ChrII	22671376	22671647
ChrII	22672375	22672980
ChrII	22687307	22689816
ChrII	22717759	22719410
ChrII	22720107	22720865
ChrII	22751775	22753128
ChrII	22754926	22755467
ChrII	22763924	22764347
ChrII	22765401	22766182
ChrII	22884001	22884681
ChrII	22904145	22905746
ChrII	22930015	22930308
ChrII	23036991	23037703
ChrII	23273574	23273789
ChrII	23300246	23310482
ChrIII	95	8548
ChrIII	85863	86366
ChrIII	410217	411357
ChrIII	453777	457588
ChrIII	468796	469314
ChrIII	470667	473344
ChrIII	591459	591847
ChrIII	610966	612177
ChrIII	718238	718891
ChrIII	720564	721915
ChrIII	780395	781193
ChrIII	804667	804985
ChrIII	806696	807908
ChrIII	823060	823669
ChrIII	825471	828118
ChrIII	842220	844185
ChrIII	964143	970893
ChrIII	972544	974872
ChrIII	1040471	1045164
ChrIII	1045839	1046127
ChrIII	1047276	1050300
ChrIII	1051920	1056422
ChrIII	1057229	1061378
ChrIII	1066489	1067422
ChrIII	1077523	1079616
ChrIII	1080652	1083129
ChrIII	1084186	1093379
ChrIII	1100586	1105000
ChrIII	1112134	1125855
ChrIII	1133552	1136057
ChrIII	1138461	1141539
ChrIII	1142212	1142453
ChrIII	1144014	1144785
ChrIII	1155468	1156243
ChrIII	1157093	1162106
ChrIII	1162944	1164337
ChrIII	1165192	1167989
ChrIII	1168666	1180217
ChrIII	1188928	1192884
ChrIII	1193587	1196763
ChrIII	1202355	1203117
ChrIII	1206572	1208654
[truncated: 6,370 more rows]

## Sheet: ATAC-seq
Chr	start	stop
ChrI	161	551
ChrI	1661	10276
ChrI	58013	59702
ChrI	62293	63061
ChrI	68246	69099
ChrI	88212	88535
ChrI	147335	147692
ChrI	168975	169788
ChrI	223031	223783
ChrI	229406	230246
ChrI	246283	247617
ChrI	303969	305477
ChrI	321712	322287
ChrI	329403	329720
ChrI	332267	332843
ChrI	340625	341505
ChrI	346152	346722
ChrI	350393	351929
ChrI	355264	355816
ChrI	380043	380398
ChrI	405264	405627
ChrI	416418	416640
ChrI	420140	421371
ChrI	422626	424698
ChrI	431158	431667
ChrI	433040	433757
ChrI	463038	463510
ChrI	475826	476055
ChrI	518080	518486
ChrI	526980	528432
ChrI	530931	532168
ChrI	538077	538673
ChrI	557695	558628
ChrI	628652	628922
ChrI	653973	654251
ChrI	666505	669123
ChrI	670986	671201
ChrI	686047	686334
ChrI	688282	689119
ChrI	697719	698531
ChrI	706147	713476
ChrI	722458	723365
ChrI	735991	736966
ChrI	738616	738963
ChrI	743562	743910
ChrI	791258	791501
ChrI	804252	804500
ChrI	825806	826018
ChrI	862568	863734
ChrI	1035008	1035559
ChrI	1055095	1056545
ChrI	1059635	1060395
ChrI	1109674	1111176
ChrI	1139195	1139498
ChrI	1187453	1187792
ChrI	1208577	1209161
ChrI	1212788	1213500
ChrI	1216462	1218652
ChrI	1219892	1220705
ChrI	1229650	1230958
ChrI	1242215	1242644
ChrI	1298268	1298743
ChrI	1301301	1302251
ChrI	1303796	1304679
ChrI	1357365	1357643
ChrI	1380816	1381366
ChrI	1445582	1470198
ChrI	1494094	1494575
ChrI	1496230	1497157
ChrI	1498479	1499033
ChrI	1542199	1542531
ChrI	1571614	1573159
ChrI	1574639	1575293
ChrI	1577311	1577956
ChrI	1643297	1643953
ChrI	1649489	1649716
ChrI	1702895	1703179
ChrI	1784004	1784305
ChrI	1856050	1856679
ChrI	1860564	1861486
ChrI	1871553	1872275
ChrI	1876707	1878421
ChrI	1880064	1880789
ChrI	1906039	1908466
ChrI	1923970	1924936
ChrI	1931823	1932111
ChrI	1940853	1941056
ChrI	1952454	1953162
ChrI	1954051	1954282
ChrI	2039917	2040500
ChrI	2062293	2062542
ChrI	2087199	2088037
ChrI	2103189	2104792
ChrI	2105643	2107148
ChrI	2120008	2120408
ChrI	2161196	2162489
ChrI	2163513	2164103
ChrI	2166631	2168570
ChrI	2177337	2177822
ChrI	2179765	2180499
ChrI	2200207	2201533
ChrI	2229356	2229707
ChrI	2256528	2257377
ChrI	2280583	2281440
ChrI	2288796	2289063
ChrI	2396728	2397127
ChrI	2478238	2480615
ChrI	2484943	2487287
ChrI	2491524	2492924
ChrI	2577261	2577854
ChrI	2595860	2596695
ChrI	2611403	2614726
ChrI	2616084	2618239
ChrI	2621589	2625937
ChrI	2627240	2627708
ChrI	2629215	2630436
ChrI	2644202	2644694
ChrI	2654762	2654971
ChrI	2689541	2692025
ChrI	2697413	2700902
ChrI	2702103	2702445
ChrI	2703857	2705265
ChrI	2708398	2708725
ChrI	2712103	2712722
ChrI	2718101	2719008
ChrI	2733765	2734089
ChrI	2849801	2850964
ChrI	2852200	2852532
ChrI	2863440	2863765
ChrI	2888305	2889250
ChrI	2893254	2893903
ChrI	2904066	2905002
ChrI	2920229	2920610
ChrI	2932299	2933364
ChrI	2934577	2935437
ChrI	2942424	2943283
ChrI	2955998	2956202
ChrI	2991089	2993619
ChrI	3002566	3002774
ChrI	3005125	3005651
ChrI	3068318	3068597
ChrI	3098351	3098912
ChrI	3100339	3100541
ChrI	3104863	3105351
ChrI	3131952	3133639
ChrI	3144199	3144515
ChrI	3162084	3163233
ChrI	3195186	3195985
ChrI	3196971	3197404
ChrI	3199096	3201212
ChrI	3205754	3205972
ChrI	3241850	3242576
ChrI	3290550	3291248
ChrI	3484697	3485331
ChrI	3510942	3511316
ChrI	3529700	3531171
ChrI	3541773	3542891
ChrI	3554285	3555276
ChrI	3583935	3584257
ChrI	3626288	3626736
ChrI	3627860	3628062
ChrI	3646973	3647655
ChrI	3650125	3650546
ChrI	3668655	3669415
ChrI	3673343	3673989
ChrI	3679540	3680421
ChrI	3726602	3726817
ChrI	3762828	3764109
ChrI	3818406	3819752
ChrI	3823268	3824269
ChrI	3910735	3910985
ChrI	3928884	3929579
ChrI	3952151	3952599
ChrI	3962336	3962775
ChrI	3995558	3995861
ChrI	4013896	4014527
ChrI	4097756	4097956
ChrI	4148188	4148467
ChrI	4158421	4158737
ChrI	4161121	4161326
ChrI	4176950	4178095
ChrI	4182925	4183259
ChrI	4271739	4272044
ChrI	4294964	4296294
ChrI	4312607	4313134
ChrI	4315297	4316324
ChrI	4317312	4318891
ChrI	4320667	4321547
ChrI	4332314	4332714
ChrI	4333848	4334537
ChrI	4335683	4336258
ChrI	4340292	4340923
ChrI	4343746	4344173
ChrI	4348603	4349330
ChrI	4351061	4352029
ChrI	4375115	4375463
ChrI	4378701	4378926
ChrI	4382142	4382407
ChrI	4520793	4521590
ChrI	4541536	4544256
ChrI	4554183	4554458
ChrI	4590443	4592144
ChrI	4627824	4628433
ChrI	4632344	4632559
ChrI	4665951	4667676
ChrI	4679118	4683293
ChrI	4684120	4684698
ChrI	4695418	4696648
ChrI	4697731	4698023
ChrI	4699542	4700172
ChrI	4703804	4704144
ChrI	4705254	4706539
ChrI	4709014	4709997
ChrI	4782148	4784828
ChrI	4787185	4787404
ChrI	4809464	4809816
ChrI	4816091	4816959
ChrI	4835519	4835843
ChrI	4860797	4861221
ChrI	4893642	4895861
ChrI	4916690	4918021
ChrI	4919504	4920901
ChrI	4923271	4923923
ChrI	4927270	4927587
ChrI	4930402	4931333
ChrI	4932754	4934523
ChrI	4936816	4937536
ChrI	4948725	4950236
ChrI	4960946	4962024
ChrI	4964535	4964998
ChrI	4990397	4990991
ChrI	5019950	5020879
ChrI	5055649	5055851
ChrI	5088954	5089653
ChrI	5094921	5095503
ChrI	5152575	5154025
ChrI	5193275	5195181
ChrI	5226248	5226612
ChrI	5250239	5252925
ChrI	5281163	5282020
ChrI	5287553	5287872
ChrI	5296399	5296664
ChrI	5323975	5324824
ChrI	5458929	5459783
ChrI	5470073	5471271
ChrI	5472145	5472927
ChrI	5473780	5474521
ChrI	5475488	5477200
ChrI	5478721	5479964
ChrI	5480953	5482921
ChrI	5484121	5484406
ChrI	5486726	5489094
ChrI	5490764	5491132
ChrI	5510908	5512208
ChrI	5534177	5534608
ChrI	5536167	5537711
ChrI	5539927	5540918
ChrI	5543150	5544727
ChrI	5546477	5546690
ChrI	5548473	5548918
ChrI	5585886	5586645
ChrI	5587602	5589319
ChrI	5625312	5625932
ChrI	5648643	5650210
ChrI	5739399	5740801
ChrI	5741896	5742219
ChrI	5745594	5748167
ChrI	5787366	5788297
ChrI	5796636	5798402
ChrI	5861301	5861909
ChrI	5896633	5897704
ChrI	5900144	5900898
ChrI	5902573	5904200
ChrI	5905931	5906244
ChrI	5907574	5909210
ChrI	5910028	5911192
ChrI	5965049	5965788
ChrI	6153772	6154168
ChrI	6173950	6174549
ChrI	6214722	6215008
ChrI	6217341	6218239
ChrI	6221193	6223028
ChrI	6224559	6226475
ChrI	6233736	6234146
ChrI	6314807	6315572
ChrI	6332766	6332966
ChrI	6384773	6385476
ChrI	6396810	6399763
ChrI	6401870	6404315
ChrI	6416922	6417254
ChrI	6421811	6422826
ChrI	6438210	6438806
ChrI	6460180	6460434
ChrI	6511402	6511821
ChrI	6567754	6568219
ChrI	6577393	6577602
ChrI	6583088	6583335
ChrI	6653502	6654246
ChrI	6715385	6715860
ChrI	6776718	6777182
ChrI	6778609	6780159
ChrI	6781258	6781656
ChrI	6816577	6817664
ChrI	6857614	6858572
ChrI	6860616	6860956
ChrI	6924229	6924803
ChrI	6939346	6939756
ChrI	6948615	6949063
ChrI	7028593	7028902
ChrI	7055837	7056124
ChrI	7079897	7080649
ChrI	7094190	7095053
ChrI	7136351	7138492
ChrI	7145326	7146000
ChrI	7160608	7162149
ChrI	7171299	7171576
ChrI	7177631	7180781
ChrI	7195008	7195338
ChrI	7199872	7203395
ChrI	7205060	7207229
ChrI	7289220	7289674
ChrI	7295964	7296404
ChrI	7330492	7331530
ChrI	7341539	7342578
ChrI	7343956	7345635
ChrI	7373533	7373838
ChrI	7374698	7374973
ChrI	7408523	7408991
ChrI	7450472	7450943
ChrI	7522952	7523727
ChrI	7535348	7535571
ChrI	7537579	7538162
ChrI	7539543	7539743
ChrI	7541972	7544528
ChrI	7547188	7547967
ChrI	7557765	7558056
ChrI	7576062	7576469
ChrI	7588518	7589013
ChrI	7594165	7595920
ChrI	7598914	7599334
ChrI	7619188	7620101
ChrI	7641272	7642216
ChrI	7654732	7655399
ChrI	7656464	7656894
ChrI	7658755	7659806
ChrI	7660776	7661587
ChrI	7668497	7668792
ChrI	7670433	7670795
ChrI	7671667	7672271
ChrI	7677607	7679640
ChrI	7680517	7682295
ChrI	7683411	7683829
ChrI	7686188	7687632
ChrI	7688461	7701123
ChrI	7817128	7818046
ChrI	7835697	7836230
ChrI	7845463	7845812
ChrI	7849466	7849824
ChrI	7850950	7851322
ChrI	7853432	7855773
ChrI	7858377	7858927
ChrI	7864162	7864559
ChrI	7887757	7888243
ChrI	7907671	7908432
ChrI	8068941	8069487
ChrI	8071086	8071468
ChrI	8078323	8079257
ChrI	8088560	8089298
ChrI	8097826	8098434
ChrI	8099708	8101315
ChrI	8125454	8126035
ChrI	8152045	8152534
ChrI	8158306	8158699
ChrI	8161189	8161397
ChrI	8226663	8226885
ChrI	8275993	8276218
ChrI	8286741	8287271
ChrI	8484386	8485098
ChrI	8494229	8495567
ChrI	8566789	8570322
ChrI	8571552	8573868
ChrI	8575272	8575696
ChrI	8577980	8578203
ChrI	8585143	8585426
ChrI	8589297	8591381
ChrI	8645097	8645344
ChrI	8655004	8655294
ChrI	8738458	8739811
ChrI	8765972	8766503
ChrI	8787615	8788074
ChrI	8869219	8869872
ChrI	8875413	8876008
ChrI	8877355	8879174
ChrI	9117403	9120739
ChrI	9123054	9125091
ChrI	9135565	9135821
ChrI	9200128	9200729
ChrI	9216546	9217265
ChrI	9266163	9266483
ChrI	9273119	9273340
ChrI	9276856	9277134
ChrI	9367574	9368058
ChrI	9495541	9496366
ChrI	9517794	9520242
ChrI	9755537	9756105
ChrI	9821072	9823002
ChrI	9919947	9920251
ChrI	9987524	9988655
ChrI	10032268	10032653
ChrI	10061412	10062842
ChrI	10157316	10158140
ChrI	10160220	10160816
ChrI	10239457	10240570
ChrI	10241632	10242794
ChrI	10243978	10245351
ChrI	10386350	10387057
ChrI	10469811	10470033
ChrI	10494823	10497666
ChrI	10498588	10499755
ChrI	10501405	10502152
ChrI	10519077	10519602
ChrI	10566767	10567862
ChrI	10613613	10614934
ChrI	10687935	10688196
ChrI	10775312	10777538
ChrI	10964474	10965112
ChrI	11001103	11001896
ChrI	11059528	11059988
ChrI	11090824	11091782
ChrI	11164210	11166053
ChrI	11275412	11275848
ChrI	11314160	11314934
ChrI	11339992	11341285
ChrI	11371741	11372431
ChrI	11392762	11393063
ChrI	11439677	11440100
ChrI	11482470	11482818
ChrI	11483767	11484104
ChrI	11541867	11542561
ChrI	11563013	11564773
ChrI	11568748	11569715
ChrI	11577750	11578776
ChrI	11580119	11580407
ChrI	11584776	11585345
ChrI	11586213	11586737
ChrI	11706111	11706491
ChrI	11711453	11711662
ChrI	11770191	11773987
ChrI	11979409	11980175
ChrI	11983747	11986858
ChrI	11989039	11989440
ChrI	11991242	11991567
ChrI	11993066	11995352
ChrI	11996343	11996917
ChrI	11999108	12001577
ChrI	12024636	12025131
ChrI	12094306	12097937
ChrI	12157374	12158030
ChrI	12159366	12161435
ChrI	12163285	12168180
ChrI	12174866	12175241
ChrI	12176289	12179897
ChrI	12186633	12187868
ChrI	12188913	12189492
ChrI	12298964	12299898
ChrI	12359671	12359943
ChrI	12416950	12423969
ChrI	12425730	12426835
ChrI	12427660	12429890
ChrI	12493876	12494140
ChrI	12518903	12519117
ChrI	12564275	12564793
ChrI	12636055	12636319
ChrI	12660233	12660596
ChrI	12701782	12702250
ChrI	12721440	12721733
ChrI	12863762	12865789
ChrI	12901669	12903970
ChrI	12983884	12984968
ChrI	13056836	13057441
ChrI	13083286	13083592
ChrI	13121438	13122599
ChrI	13167069	13167673
ChrI	13189465	13189939
ChrI	13221815	13222368
ChrI	13284709	13285391
ChrI	13292067	13293616
ChrI	13314747	13315115
ChrI	13373687	13375448
ChrI	13376429	13377036
ChrI	13382897	13384747
ChrI	13386210	13386550
ChrI	13423713	13423985
ChrI	13443774	13444006
ChrI	13468287	13468530
ChrI	13574985	13575625
ChrI	13588097	13588437
ChrI	13594125	13598414
ChrI	13663125	13663435
ChrI	13667000	13667847
ChrI	13682159	13682901
ChrI	13707663	13707864
ChrI	13808942	13809158
ChrI	13839449	13840420
ChrI	13844392	13844871
ChrI	13881210	13881480
ChrI	13962954	13963605
ChrI	14011403	14011816
ChrI	14037276	14037489
ChrI	14046896	14050166
ChrI	14052328	14053542
ChrI	14054579	14057122
ChrI	14059724	14061606
ChrI	14164302	14164633
ChrI	14176687	14176957
ChrI	14179284	14180135
ChrI	14191751	14193000
ChrI	14212317	14213138
ChrI	14310698	14310898
ChrI	14313702	14314869
ChrI	14370591	14371215
ChrI	14372413	14372968
ChrI	14374449	14375307
ChrI	14376670	14378019
ChrI	14378973	14379795
ChrI	14418431	14419088
ChrI	14461282	14461495
ChrI	14469015	14470415
ChrI	14513545	14515213
ChrI	14536607	14537860
ChrI	14539492	14539711
ChrI	14570075	14571914
ChrI	14574132	14576727
ChrI	14578035	14579808
ChrI	14608530	14608971
ChrI	14627704	14628107
ChrI	14675375	14675670
ChrI	14730087	14732055
ChrI	14745982	14747919
ChrI	14755509	14757731
ChrI	14759300	14759670
ChrI	14766309	14767064
ChrI	14853105	14854169
ChrI	14864339	14864640
ChrI	14918334	14919998
ChrI	14928860	14929060
ChrI	14931678	14932440
ChrI	14934107	14937914
ChrI	14945157	14945756
ChrI	14947037	14947601
ChrI	14948670	14954016
ChrI	14956161	14956497
ChrI	14957670	14958038
ChrI	14959147	14962280
ChrI	14963855	14965854
ChrI	14988842	14989972
ChrI	15037477	15038370
ChrI	15042812	15043274
ChrI	15051980	15052532
ChrI	15092144	15092472
ChrI	15125964	15127438
ChrI	15179417	15179723
ChrI	15194914	15196419
ChrI	15199252	15199452
ChrI	15218164	15218727
ChrI	15255720	15255954
ChrI	15259422	15260320
ChrI	15266401	15266739
ChrI	15326724	15327289
ChrI	15334012	15334713
ChrI	15346145	15346520
ChrI	15360983	15361185
ChrI	15366610	15366818
ChrI	15371091	15372474
ChrI	15392008	15394977
ChrI	15396814	15397732
ChrI	15422521	15423086
ChrI	15439473	15440048
ChrI	15482347	15482664
ChrI	15491396	15499393
ChrI	15509131	15509833
ChrI	15519631	15519980
ChrI	15523009	15523781
ChrI	15557681	15559827
ChrI	15623982	15624321
ChrI	15681198	15684258
ChrI	15685121	15695376
ChrI	15702990	15703747
ChrI	15743712	15744056
ChrI	15774113	15775064
ChrI	15776496	15778719
ChrI	15781268	15782775
ChrI	15784903	15788573
ChrI	15789728	15791877
ChrI	15793049	15793495
ChrI	15794912	15795505
ChrI	15852314	15852908
ChrI	15854205	15855147
ChrI	15855954	15856448
ChrI	15857877	15859628
ChrI	15861378	15865039
ChrI	15865974	15867640
ChrI	15869151	15870203
ChrI	15871317	15872833
ChrI	15875010	15875948
ChrI	15877644	15879243
ChrI	15881990	15882925
ChrI	15883784	15887685
ChrI	15888604	15889138
ChrI	15900203	15900647
ChrI	15905625	15905908
ChrI	15957269	15957829
ChrI	16090279	16090522
ChrI	16215392	16215904
ChrI	16239493	16239693
ChrI	16272336	16273055
ChrI	16306151	16306449
ChrI	16307314	16308534
ChrI	16309573	16309983
ChrI	16310821	16311346
ChrI	16325186	16325636
ChrI	16341271	16341969
ChrI	16347656	16348050
ChrI	16348861	16349298
ChrI	16368975	16369410
ChrI	16373927	16374198
ChrI	16385627	16387585
ChrI	16389211	16391832
ChrI	16405415	16405842
ChrI	16410592	16411441
ChrI	16423472	16423777
ChrI	16427325	16428530
ChrI	16442212	16443339
ChrI	16445463	16446938
ChrI	16468753	16469562
ChrI	16524557	16525483
ChrI	16654331	16654625
ChrI	16720361	16720815
ChrI	16764315	16764623
ChrI	16806079	16808645
ChrI	16809689	16815545
ChrI	16816976	16817250
ChrI	16818079	16821832
ChrI	16825547	16826559
ChrI	16829129	16829680
ChrI	16831587	16833152
ChrI	16836688	16838418
ChrI	16839272	16839975
ChrI	16871736	16873634
ChrI	16875759	16876384
ChrI	16901730	16906718
ChrI	16924371	16925080
ChrI	16950628	16951556
ChrI	17004035	17004330
ChrI	17025661	17026038
ChrI	17129660	17131441
ChrI	17134732	17135251
ChrI	17147682	17148977
ChrI	17168117	17170745
ChrI	17212509	17212869
ChrI	17276549	17277059
ChrI	17290601	17292690
ChrI	17302514	17302714
ChrI	17338423	17339520
ChrI	17354812	17356070
ChrI	17415161	17416766
ChrI	17419825	17422793
ChrI	17434731	17434968
ChrI	17492985	17493844
ChrI	17511374	17512893
ChrI	17525402	17525606
ChrI	17549285	17551460
ChrI	17566479	17567249
ChrI	17568153	17569989
ChrI	17582936	17583528
ChrI	17584674	17585079
ChrI	17586283	17587591
ChrI	17593009	17593430
ChrI	17608506	17609156
ChrI	17610220	17611692
ChrI	17612812	17614520
ChrI	17630911	17632002
ChrI	17637169	17640256
ChrI	17642745	17648035
ChrI	17671595	17672074
ChrI	17714427	17715553
ChrI	17721631	17722116
ChrI	17804675	17805280
ChrI	17815284	17815644
ChrI	17888160	17889340
ChrI	17931463	17931819
ChrI	17944117	17944332
ChrI	17960819	17961073
ChrI	17962559	17963090
ChrI	17965789	17966253
ChrI	17967667	17968105
ChrI	17972514	17973393
ChrI	17982859	17984037
ChrI	17985044	17986179
ChrI	17992329	17992757
ChrI	18020775	18021743
ChrI	18035288	18035727
ChrI	18053852	18055156
ChrI	18058428	18058652
ChrI	18062032	18062413
ChrI	18074138	18074476
ChrI	18091197	18091691
ChrI	18101770	18102919
ChrI	18135960	18136668
ChrI	18139779	18140009
ChrI	18148131	18148872
ChrI	18155693	18155920
ChrI	18167635	18168358
ChrI	18181885	18182289
ChrI	18193665	18194232
ChrI	18219579	18219880
ChrI	18230898	18232116
ChrI	18237662	18244174
ChrI	18248897	18249182
ChrI	18281866	18282161
ChrI	18287675	18287983
ChrI	18289571	18291382
ChrI	18390304	18391922
ChrI	18411003	18411203
ChrI	18437398	18438597
ChrI	18440599	18441440
ChrI	18448686	18449031
ChrI	18458285	18458485
ChrI	18461058	18462930
ChrI	18464442	18464789
ChrI	18478487	18479336
ChrI	18485000	18485430
ChrI	18487200	18488573
ChrI	18490222	18491714
ChrI	18495151	18495899
ChrI	18501430	18502244
ChrI	18507127	18507642
ChrI	18527071	18527994
ChrI	18553996	18554573
ChrI	18580136	18580720
ChrI	18586089	18586423
ChrI	18640537	18642283
ChrI	18653734	18653972
ChrI	18656305	18656515
ChrI	18671793	18673763
ChrI	18696063	18699419
ChrI	18700584	18702657
ChrI	18704125	18704979
ChrI	18712651	18714799
ChrI	18715835	18716294
ChrI	18736381	18737230
ChrI	18812314	18812743
ChrI	18906531	18907527
ChrI	18908817	18910853
ChrI	18911933	18913049
ChrI	18934695	18934936
ChrI	18995281	18996348
ChrI	19021053	19021802
ChrI	19061177	19061416
ChrI	19158256	19159224
ChrI	19197705	19197994
ChrI	19207725	19208102
ChrI	19348205	19349719
ChrI	19351545	19351936
ChrI	19358342	19358809
ChrI	19360143	19360727
ChrI	19467334	19467769
ChrI	19486652	19487174
ChrI	19488523	19489196
ChrI	19501806	19502112
ChrI	19518258	19518906
ChrI	19534129	19534994
ChrI	19548439	19549001
ChrI	19564716	19564917
ChrI	19572310	19572864
ChrI	19578751	19579407
ChrI	19599333	19599613
ChrI	19600611	19601161
ChrI	19611531	19611957
ChrI	19622992	19623442
ChrI	19647748	19648164
ChrI	19657380	19657890
ChrI	19735590	19736425
ChrI	19752158	19752358
ChrI	19787014	19787611
ChrI	19791259	19791733
ChrI	19800574	19801457
ChrI	19803407	19804758
ChrI	19806580	19806951
ChrI	19809368	19809970
ChrI	19812538	19812924
ChrI	19817671	19819228
ChrI	19823878	19824078
ChrI	19835418	19836654
ChrI	19870717	19871122
ChrI	19874442	19876786
ChrI	19887528	19888777
ChrI	19907487	19908022
ChrI	19912354	19912771
ChrI	20130883	20131312
ChrI	20214157	20214773
ChrI	20343137	20343733
ChrI	20349776	20350122
ChrI	20377054	20377270
ChrI	20380512	20380745
ChrI	20429581	20429781
ChrI	20453945	20454527
ChrI	20473630	20476731
ChrI	20621846	20622776
ChrI	20642066	20642356
ChrI	20646729	20647264
ChrI	20681802	20682381
ChrI	20685719	20685919
ChrI	20710663	20713498
ChrI	20737358	20737814
ChrI	20771585	20772226
ChrI	20824232	20825237
ChrI	20866319	20867344
ChrI	20912520	20912927
ChrI	21071208	21073235
ChrI	21105938	21106255
ChrI	21108756	21109515
ChrI	21110779	21111082
ChrI	21112311	21114173
ChrI	21120256	21120491
ChrI	21151377	21152087
ChrI	21174303	21174889
ChrI	21184605	21185461
ChrI	21195570	21196051
ChrI	21239593	21241745
ChrI	21245930	21247766
ChrI	21268584	21269556
ChrI	21271236	21272579
ChrI	21276388	21277255
ChrI	21292118	21292534
ChrI	21347579	21348305
ChrI	21369374	21370179
ChrI	21410863	21412859
ChrI	21413811	21414373
ChrI	21415179	21415830
ChrI	21419825	21420513
ChrI	21436259	21437017
ChrI	21451225	21452896
ChrI	21516959	21517901
ChrI	21521249	21521573
ChrI	21537507	21537766
ChrI	21548074	21548720
ChrI	21557805	21558444
ChrI	21560096	21560954
ChrI	21568872	21569085
ChrI	21587596	21588809
ChrI	21602224	21603297
ChrI	21606134	21607807
ChrI	21614859	21615110
ChrI	21629341	21629775
ChrI	21642270	21642607
ChrI	21647847	21648102
ChrI	21649742	21650503
ChrI	21659393	21660646
ChrI	21719575	21720416
ChrI	21723875	21724214
ChrI	21726010	21726626
ChrI	21762981	21763244
ChrI	21772800	21773137
ChrI	21809260	21809509
ChrI	21814732	21817599
ChrI	21845803	21847170
ChrI	21849251	21849546
ChrI	21869819	21870963
ChrI	21885229	21885526
ChrI	21890300	21891412
ChrI	21916846	21918192
ChrI	21943488	21944607
ChrI	21973682	21974438
ChrI	22138330	22140016
ChrI	22147885	22148953
ChrI	22151502	22152071
ChrI	22215640	22216268
ChrI	22218346	22218861
ChrI	22279212	22280023
ChrI	22320446	22321299
ChrI	22331314	22331578
ChrI	22333178	22333417
ChrI	22342386	22342804
ChrI	22432904	22433258
ChrI	22443646	22444419
ChrI	22447320	22447844
ChrI	22450885	22451250
ChrI	22453703	22454828
ChrI	22455702	22455914
ChrI	22459129	22459856
ChrI	22519005	22519411
ChrI	22584539	22584821
ChrI	22609560	22610142
ChrI	22611669	22612208
ChrI	22615645	22616876
ChrI	22619248	22619481
ChrI	22622041	22622522
ChrI	22624718	22631836
ChrI	22698961	22699785
ChrI	22713544	22714235
ChrI	22802057	22802404
ChrI	22983020	22984110
ChrI	22985117	22986090
ChrI	23033816	23034016
ChrI	23055831	23056261
ChrI	23057441	23059236
ChrI	23070486	23071049
ChrI	23114425	23114915
ChrI	23172600	23173246
ChrI	23177311	23177511
ChrI	23179480	23180457
ChrI	23182854	23183155
ChrI	23209629	23210110
ChrI	23214670	23214941
ChrI	23261667	23262656
ChrI	23311965	23313724
ChrI	23314849	23316481
ChrI	23318165	23318367
ChrI	23319392	23320284
ChrI	23323694	23325882
ChrI	23327075	23327913
ChrI	23328736	23329427
ChrI	23333577	23335647
ChrI	23337644	23337937
ChrI	23339004	23340470
ChrI	23343168	23343684
ChrI	23380261	23380465
ChrI	23392752	23394451
ChrI	23396292	23397223
ChrI	23398693	23401936
ChrI	23402805	23409153
ChrI	23411159	23411608
ChrI	23413713	23414635
ChrI	23415740	23417494
ChrI	23418730	23419186
ChrI	23421079	23423285
ChrI	23441499	23442379
ChrI	23445481	23446572
ChrI	23459087	23460118
ChrI	23485787	23486787
ChrI	23549952	23550272
ChrI	23553216	23553416
ChrI	23566603	23567290
ChrI	23570103	23570392
ChrI	23612231	23613214
ChrI	23655558	23656203
ChrI	23673107	23674590
ChrI	23705700	23706712
ChrI	23717716	23718880
ChrI	23722698	23723552
ChrI	23736824	23738457
ChrI	23743729	23745405
ChrI	23746404	23750005
ChrI	23751664	23754400
ChrI	23771817	23772585
ChrI	23808599	23810230
ChrI	23866145	23869451
ChrI	23952447	23952708
ChrI	24094422	24094776
ChrI	24096389	24100228
ChrI	24113152	24113372
ChrI	24115682	24115956
ChrI	24229962	24231548
ChrI	24240035	24242141
ChrI	24259824	24261549
ChrI	24269839	24272637
ChrI	24287307	24287542
ChrI	24289677	24291207
ChrI	24293212	24293650
ChrI	24297147	24297641
ChrI	24311695	24312437
ChrI	24350878	24351419
ChrI	24355402	24357272
ChrI	24361033	24361750
ChrI	24369688	24370859
ChrI	24382636	24382999
ChrI	24384060	24385837
ChrI	24388613	24389695
ChrI	24391988	24392535
ChrI	24427992	24429010
ChrI	24430941	24431271
ChrI	24446505	24446705
ChrI	24493578	24494512
ChrI	24514972	24515324
ChrI	24520433	24521202
ChrI	24522967	24523351
ChrI	24554901	24555212
ChrI	24625239	24626213
ChrI	24629777	24630062
ChrI	24639361	24639982
ChrI	24654681	24655680
ChrI	24657350	24658365
ChrI	24660452	24661029
ChrI	24662082	24662465
ChrI	24722082	24723940
ChrI	24766949	24768067
ChrI	24773806	24774633
ChrI	24793477	24795160
ChrI	24808387	24809900
ChrI	24811474	24816049
ChrI	24818146	24818458
ChrI	24821487	24825154
ChrI	24837840	24838488
ChrI	24953802	24954907
ChrI	24960378	24960814
ChrI	24963094	24964799
ChrI	24966256	24966636
ChrI	24967696	24968043
ChrI	24985894	24986428
ChrI	25037549	25038186
ChrI	25039954	25040328
ChrI	25042139	25042741
ChrI	25137096	25137558
ChrI	25141501	25142467
ChrI	25143566	25144354
ChrI	25158500	25159986
ChrI	25173301	25173624
ChrI	25178318	25178651
ChrI	25193029	25193673
ChrI	25245670	25246684
ChrI	25259710	25260058
ChrI	25274648	25274994
ChrI	25282486	25282787
ChrI	25284005	25284444
ChrI	25285963	25287779
ChrI	25325133	25325857
ChrI	25354384	25354813
ChrI	25380172	25380563
ChrI	25395687	25396086
ChrI	25489278	25489935
ChrI	25501532	25502403
ChrI	25531356	25531654
ChrI	25532607	25533451
ChrI	25536548	25537383
ChrI	25538890	25539161
ChrI	25540312	25540929
ChrI	25542185	25542419
ChrI	25575176	25575729
ChrI	25585432	25587640
ChrI	25637989	25639363
ChrI	25714155	25715788
ChrI	25721338	25721961
ChrI	25745840	25746333
ChrI	25752033	25752326
ChrI	25827620	25827941
ChrI	25845702	25846907
ChrI	25849357	25850345
ChrI	25856863	25857165
ChrI	25892581	25893258
ChrI	25913861	25914782
ChrI	25929693	25929893
ChrI	25952311	25952511
ChrI	25958136	25960176
ChrI	25961272	25962585
ChrI	25966246	25967808
ChrI	26037427	26037739
ChrI	26043181	26043684
ChrI	26108994	26110885
ChrI	26112212	26113603
ChrI	26114757	26115709
ChrI	26183938	26184206
ChrI	26195267	26197546
ChrI	26199159	26199766
ChrI	26217791	26218758
ChrI	26229473	26229917
ChrI	26250050	26251375
ChrI	26252208	26252978
ChrI	26297784	26298418
ChrI	26301850	26302177
ChrI	26305030	26305412
ChrI	26323872	26324185
ChrI	26329602	26331124
ChrI	26332357	26333991
ChrI	26334883	26335664
ChrI	26336942	26338131
ChrI	26349294	26349920
ChrI	26393809	26394595
ChrI	26417091	26417418
ChrI	26421770	26422118
ChrI	26440551	26441371
ChrI	26490110	26490593
ChrI	26521564	26523091
ChrI	26544255	26544943
ChrI	26546535	26551036
ChrI	26552736	26553150
ChrI	26553984	26554493
ChrI	26586879	26587342
ChrI	26596409	26596657
ChrI	26598254	26599437
ChrI	26607596	26611705
ChrI	26612592	26613616
ChrI	26617845	26621670
ChrI	26622503	26625561
ChrI	26626589	26628195
ChrI	26629095	26630453
ChrI	26631480	26631747
ChrI	26632692	26634673
ChrI	26637901	26639730
ChrI	26679539	26681887
ChrI	26683271	26683841
ChrI	26685912	26687157
ChrI	26734962	26742276
ChrI	26743106	26744824
ChrI	26761088	26761296
ChrI	26767325	26768156
ChrI	26772410	26772610
ChrI	26773515	26773957
ChrI	26782974	26783255
ChrI	26808992	26809356
ChrI	26826260	26826617
ChrI	26841862	26842187
ChrI	26856126	26857182
ChrI	26895934	26896797
ChrI	26900829	26901442
ChrI	26948999	26949739
ChrI	26957737	26960684
ChrI	26967661	26968438
ChrI	26991285	26991613
ChrI	27073284	27073899
ChrI	27092471	27093001
ChrI	27096456	27097108
ChrI	27112305	27112617
ChrI	27123582	27126122
ChrI	27131837	27132527
ChrI	27145575	27146067
ChrI	27180191	27184181
ChrI	27189257	27189553
ChrI	27199224	27200204
ChrI	27205860	27206239
ChrI	27238157	27239049
ChrI	27245028	27245638
ChrI	27246569	27246931
ChrI	27275803	27276003
ChrI	27336960	27337172
ChrI	27412666	27413133
ChrI	27436216	27443084
ChrI	27523912	27524608
ChrI	27562608	27563154
ChrI	27571875	27572179
ChrI	27583921	27584202
ChrI	27587488	27589200
ChrI	27607860	27608647
ChrI	27693318	27696905
ChrI	27697798	27699401
ChrI	27700263	27704115
ChrI	27705185	27705742
ChrI	27706767	27707398
ChrI	27793989	27794628
ChrI	27824653	27825494
ChrI	27835493	27836966
ChrI	27853182	27853713
ChrI	27861521	27861961
ChrI	27863166	27863527
ChrI	27864717	27864996
ChrI	27879468	27879858
ChrI	27899299	27899938
ChrI	27910769	27911543
ChrI	27929467	27929822
ChrI	27962171	27962409
ChrI	28018917	28019117
ChrI	28025974	28027705
ChrI	28034891	28035160
ChrI	28048470	28049145
ChrI	28050739	28052097
ChrI	28090867	28091149
ChrI	28097454	28098332
ChrI	28100060	28101806
ChrI	28162643	28163607
ChrI	28167283	28167628
ChrI	28170216	28171178
ChrI	28172436	28173796
ChrI	28202247	28202569
ChrI	28308701	28310134
ChrI	28327142	28327614
ChrI	28422983	28424090
ChrI	28483488	28484632
ChrI	28502848	28504494
ChrI	28516132	28516334
ChrI	28534466	28535572
ChrI	28546220	28546564
ChrI	28550603	28552946
ChrI	28576517	28577174
ChrI	28648016	28648687
ChrI	28653781	28654321
ChrI	28655320	28656368
ChrI	28691908	28694373
ChrI	28695417	28699939
ChrI	28709832	28710051
ChrI	28723772	28724611
ChrI	28757687	28758096
ChrI	28845280	28845878
ChrI	28880614	28882198
ChrI	28883384	28883624
ChrI	28884494	28886556
ChrI	28887430	28889264
ChrI	28893522	28894028
ChrI	29013141	29014354
ChrI	29033773	29033987
ChrI	29040154	29043226
ChrI	29049491	29050158
ChrI	29076624	29076854
ChrI	29166311	29167174
ChrI	29234002	29236072
ChrI	29239279	29239479
ChrI	29279563	29280065
ChrI	29283064	29284164
ChrI	29352682	29352895
ChrI	29409611	29412576
ChrI	29414072	29414794
ChrI	29417514	29418038
ChrI	29419010	29419707
ChrI	29425820	29426401
ChrI	29427648	29428777
ChrI	29438758	29443617
ChrI	29444463	29445004
ChrI	29446665	29447139
ChrI	29453826	29454362
ChrI	29458713	29460513
ChrI	29464793	29465165
ChrI	29471835	29473293
ChrI	29488327	29489342
ChrI	29497791	29498111
ChrI	29561158	29561692
ChrI	29563718	29564670
ChrI	29574117	29574392
ChrI	29591357	29592237
ChrI	29599246	29600203
ChrI	29624997	29625226
ChrI	29645008	29645208
ChrI	29672156	29673357
ChrI	29674806	29680248
ChrI	29686565	29687142
ChrI	29692095	29693964
ChrI	29698397	29699046
ChrI	29701952	29702490
ChrI	29712889	29715143
ChrI	29716521	29717974
ChrI	29719904	29720485
ChrI	29748074	29748650
ChrI	29753926	29755045
ChrI	29757572	29757924
ChrI	29845293	29846433
ChrI	29867810	29868234
ChrI	29870919	29871650
ChrI	29874038	29875145
ChrI	29878421	29879347
ChrI	29983316	29983822
ChrI	30007190	30007841
ChrI	30016200	30018662
ChrI	30029074	30030299
ChrI	30054896	30055630
ChrI	30064615	30066519
ChrI	30077266	30077466
ChrI	30080960	30081681
ChrI	30102283	30102679
ChrI	30136767	30138926
ChrI	30195478	30196041
ChrI	30201079	30201505
ChrI	30211235	30211972
ChrI	30229156	30229629
ChrI	30265893	30266763
ChrI	30269174	30269685
ChrI	30302982	30303480
ChrI	30334937	30335209
ChrI	30342045	30342536
ChrI	30373965	30374291
ChrI	30425402	30426016
ChrI	30430533	30430779
ChrI	30552788	30553202
ChrI	30593794	30594647
ChrI	30645807	30646012
ChrI	30673692	30674151
ChrI	30775248	30775733
ChrI	30845287	30845671
ChrI	30896161	30896527
ChrI	30910685	30913348
ChrI	30948736	30949087
ChrI	30950204	30950707
ChrI	30952379	30953314
ChrI	30996507	30996969
ChrI	31082059	31083472
ChrI	31286838	31287078
ChrI	31348271	31349608
ChrI	31395507	31395747
ChrI	31424550	31425616
ChrI	31464502	31465394
ChrI	31469879	31470111
ChrI	31475120	31475600
ChrI	31485829	31486498
ChrI	31511627	31512370
ChrI	31513679	31514451
ChrI	31516391	31518819
ChrI	31531159	31531359
ChrI	31541113	31546164
ChrI	31591751	31592061
ChrI	31651421	31652984
ChrI	31656350	31656714
ChrI	31660245	31660667
ChrI	31664873	31665299
ChrI	31666383	31666925
ChrI	31788478	31789530
ChrI	31816466	31817519
ChrI	31845401	31846537
ChrI	31874426	31874626
ChrI	31923955	31926338
ChrI	31973715	31974183
ChrI	31992187	31992499
ChrI	32046655	32047294
ChrI	32125441	32125743
ChrI	32128035	32129357
ChrI	32158598	32158953
ChrI	32163698	32164574
ChrI	32236599	32237452
ChrI	32238949	32239695
ChrI	32306061	32306918
ChrI	32309158	32309380
ChrI	32312172	32312836
ChrI	32423918	32425154
ChrI	32437082	32437416
ChrI	32445767	32446017
ChrI	32513665	32515118
ChrI	32516009	32516586
ChrI	32517765	32518909
ChrI	32558175	32558387
ChrI	32567393	32568714
ChrI	32572478	32573146
ChrI	32642810	32643389
ChrI	32644730	32646257
ChrI	32647960	32648664
ChrI	32650786	32651798
ChrI	32693213	32693737
ChrI	32697317	32698577
ChrI	32699669	32700755
ChrI	32705401	32706400
ChrI	32713608	32714163
ChrI	32722711	32723647
ChrI	32735610	32736720
ChrI	32765730	32767332
ChrI	32826846	32827231
ChrI	32871109	32872156
ChrI	32889615	32890379
ChrI	32906151	32906628
ChrI	32910815	32911923
ChrI	32986071	32986365
ChrI	32995173	32995806
ChrI	33003771	33005702
ChrI	33064487	33064812
ChrI	33127405	33128259
ChrI	33145790	33146465
ChrI	33152996	33153297
ChrI	33233617	33233889
ChrI	33242576	33243092
ChrI	33244943	33246030
ChrI	33269379	33269602
ChrI	33279091	33279338
ChrI	33315687	33316096
ChrI	33319961	33320352
ChrI	33321787	33323399
ChrI	33339780	33341640
ChrI	33378445	33379308
ChrI	33381602	33382374
ChrI	33385941	33386462
ChrI	33398164	33404156
ChrI	33405063	33405682
ChrI	33517505	33518005
ChrI	33541793	33542513
ChrI	33549846	33550491
ChrI	33558918	33559502
ChrI	33562037	33563819
ChrI	33567660	33568877
ChrI	33576439	33577050
ChrI	33581186	33583574
ChrI	33608540	33608740
ChrI	33664219	33665310
ChrI	33668296	33670263
ChrI	33742963	33743225
ChrI	33751407	33753153
ChrI	33758958	33759280
ChrI	33770131	33770331
ChrI	33776591	33777375
ChrI	33822054	33822430
ChrI	33835648	33837112
ChrI	33839917	33840979
ChrI	33844602	33847086
ChrI	33850061	33850697
ChrI	33856579	33857670
ChrI	33869114	33869644
ChrI	33921594	33923805
ChrI	33926668	33927468
ChrI	33947826	33948499
ChrI	33958273	33959971
ChrI	33975436	33976078
ChrI	33978828	33979413
ChrI	34029401	34030216
ChrI	34076120	34076343
ChrI	34101926	34102126
ChrI	34104109	34104804
ChrI	34115356	34117022
ChrI	34126237	34126657
ChrI	34203918	34204494
ChrI	34372999	34373671
ChrI	34387784	34388035
ChrI	34429735	34429938
ChrI	34471822	34472618
ChrI	34504480	34504735
ChrI	34523767	34524000
ChrI	34535140	34535524
ChrI	34546697	34548539
ChrI	34551733	34551933
ChrI	34575906	34576252
ChrI	34578682	34579204
ChrI	34584083	34584288
ChrI	34599256	34600379
ChrI	34637269	34637603
ChrI	34644444	34645490
ChrI	34672421	34672681
ChrI	34675081	34675570
ChrI	34684655	34685762
ChrI	34686662	34687682
ChrI	34688528	34688763
ChrI	34694318	34697041
ChrI	34699026	34700045
ChrI	34700913	34702961
ChrI	34703771	34704290
ChrI	34711354	34712341
ChrI	34713213	34713889
ChrI	34758470	34758989
ChrI	34764116	34764930
ChrI	34767207	34767978
ChrI	34771117	34773488
ChrI	34775704	34776517
ChrI	34778099	34778674
ChrI	34791956	34792672
ChrI	34793491	34793901
ChrI	34795067	34795708
ChrI	34804450	34804782
ChrI	34805729	34807953
ChrI	34812512	34814278
ChrI	34844667	34845422
ChrI	34876632	34876947
ChrI	34880727	34881231
ChrI	34886627	34886858
ChrI	34888921	34890363
ChrI	34897440	34897727
ChrI	34899793	34902167
ChrI	34903942	34907371
ChrI	34908368	34908901
ChrI	34920254	34920471
ChrI	34927990	34929803
ChrI	34986589	34988001
ChrI	35035973	35036311
ChrI	35038853	35040159
ChrI	35052378	35052836
ChrI	35103544	35104316
ChrI	35111081	35112395
ChrI	35163034	35163579
ChrI	35215072	35215311
ChrI	35239566	35240732
ChrI	35254266	35255355
ChrI	35265464	35265929
ChrI	35271218	35272308
ChrI	35352950	35353684
ChrI	35411907	35412223
ChrI	35413197	35414749
ChrI	35428716	35428916
ChrI	35430177	35430642
ChrI	35433832	35434255
ChrI	35439175	35439454
ChrI	35446275	35446790
ChrI	35456791	35463165
ChrI	35470594	35471462
ChrI	35482958	35483632
ChrI	35489015	35500532
ChrI	35532711	35533807
ChrI	35552864	35554473
ChrI	35555764	35556539
ChrI	35618820	35619154
ChrI	35683708	35684555
ChrI	35696489	35696716
ChrI	35765018	35765250
ChrI	35785973	35786706
ChrI	35787737	35788027
ChrI	35809609	35811478
ChrI	35824393	35824603
ChrI	35827155	35827601
ChrI	35861934	35862695
ChrI	35866930	35871107
ChrI	35873368	35873810
ChrI	35875329	35876495
ChrI	35904845	35906298
ChrI	35914193	35914778
ChrI	35932068	35933274
ChrI	35953715	35954692
ChrI	35993461	35993945
ChrI	36041434	36041941
ChrI	36060971	36061767
ChrI	36069616	36070081
ChrI	36078776	36080114
ChrI	36104316	36106708
ChrI	36165568	36166533
ChrI	36168822	36169056
ChrI	36171301	36172991
ChrI	36216721	36217278
ChrI	36233968	36234259
ChrI	36235760	36236132
ChrI	36236970	36237452
ChrI	36273370	36278777
ChrI	36308270	36309732
ChrI	36310904	36311316
ChrI	36366097	36366955
ChrI	36432199	36432658
ChrI	36437164	36438255
ChrI	36464616	36464919
ChrI	36553808	36554592
ChrI	36588268	36588858
ChrI	36598110	36598514
ChrI	36633438	36638666
ChrI	36646346	36647002
ChrI	36650097	36650433
ChrI	36697706	36697906
ChrI	36701489	36702876
ChrI	36704182	36705710
ChrI	36710322	36711366
ChrI	36799079	36799288
ChrI	36800298	36801373
ChrI	36807371	36807571
ChrI	36813458	36814405
ChrI	37035608	37035981
ChrI	37221987	37222239
ChrI	37275546	37276430
ChrI	37305675	37306116
ChrI	37379321	37380288
ChrI	37497045	37497907
ChrI	37544934	37545363
ChrI	37552119	37552401
ChrI	37556761	37557109
ChrI	37649932	37650834
ChrI	37657276	37657710
ChrI	37662231	37662551
ChrI	37675282	37675811
ChrI	37682769	37683495
ChrI	37724630	37725366
ChrI	37735691	37736432
ChrI	37744575	37744980
ChrI	37759593	37761656
ChrI	37777717	37778103
ChrI	37784261	37786856
ChrI	37787983	37788695
ChrI	37789866	37791989
ChrI	37794845	37795263
ChrI	37796076	37796349
ChrI	37815794	37817830
ChrI	37823416	37823616
ChrI	37842446	37846149
ChrI	37855139	37855459
ChrI	37861531	37862395
ChrI	37869628	37870533
ChrI	37879413	37880101
ChrI	37902499	37903190
ChrI	37922961	37926838
ChrI	37929550	37930372
ChrI	37935907	37936239
ChrI	37944618	37947513
ChrI	37950279	37951098
ChrI	37953822	37954296
ChrI	37982182	37982656
ChrI	37987571	37988009
ChrI	37995025	37995726
ChrI	37998148	37999140
ChrI	38012210	38012463
ChrI	38026870	38027117
ChrI	38031289	38032062
ChrI	38097357	38097630
ChrI	38135886	38136127
ChrI	38162200	38163291
ChrI	38164328	38170456
ChrI	38171568	38172308
ChrI	38177694	38177900
ChrI	38218439	38219195
ChrI	38220755	38221095
ChrI	38251763	38253445
ChrI	38254974	38256176
ChrI	38259472	38260512
ChrI	38266324	38266788
ChrI	38270090	38270966
ChrI	38429313	38429947
ChrI	38434773	38435845
ChrI	38455945	38457380
ChrI	38470443	38475178
ChrI	38551864	38553761
ChrI	38562056	38562920
ChrI	38563904	38564454
ChrI	38574315	38574904
ChrI	38602005	38607162
ChrI	38700267	38700774
ChrI	38709080	38709726
ChrI	38713061	38713935
ChrI	38728366	38729269
ChrI	38753871	38754979
ChrI	38756772	38757370
ChrI	38775246	38776030
ChrI	38777060	38777672
ChrI	38781455	38782440
ChrI	38798775	38799469
ChrI	38839805	38842048
ChrI	38855763	38857277
ChrI	38889441	38890467
ChrI	38910280	38910861
ChrI	38918873	38920848
ChrI	38952731	38953090
ChrI	38954241	38955623
ChrI	38961757	38962370
ChrI	38965180	38966328
ChrI	38989096	38990546
ChrI	39007520	39007816
ChrI	39008957	39009273
ChrI	39017866	39018428
ChrI	39023896	39024365
ChrI	39036944	39037722
ChrI	39043865	39045294
ChrI	39050308	39050671
ChrI	39061377	39061805
ChrI	39076829	39078266
ChrI	39093361	39094536
ChrI	39097925	39098800
ChrI	39099652	39101291
ChrI	39109654	39113084
ChrI	39115218	39116248
ChrI	39128052	39128663
ChrI	39151381	39152155
ChrI	39159463	39159669
ChrI	39182378	39182722
ChrI	39190561	39191300
ChrI	39198175	39198507
ChrI	39205173	39206031
ChrI	39218720	39219316
ChrI	39222429	39224016
ChrI	39230346	39230747
ChrI	39233009	39233437
ChrI	39240845	39242228
ChrI	39473639	39473883
ChrI	39488287	39489099
ChrI	39511079	39511964
ChrI	39520823	39521693
ChrI	39524634	39525554
ChrI	39547258	39556111
ChrII	96	4729
ChrII	8285	8839
ChrII	9698	10000
ChrII	29902	30497
ChrII	51231	51821
ChrII	83173	86681
ChrII	96668	97913
ChrII	99098	99485
ChrII	100622	101587
ChrII	104615	104824
ChrII	166718	167581
ChrII	185586	186292
ChrII	226006	226933
ChrII	235273	235515
ChrII	247355	248385
ChrII	313263	313652
ChrII	354357	354651
ChrII	382101	383620
ChrII	411342	411787
ChrII	415362	416230
ChrII	434336	435018
ChrII	442102	444375
ChrII	458274	460100
ChrII	461715	461986
ChrII	462924	463151
ChrII	483033	483878
ChrII	500355	501234
ChrII	515041	515359
ChrII	542966	543461
ChrII	552050	552250
ChrII	554958	556058
ChrII	558314	558625
ChrII	569852	572980
ChrII	589769	591732
ChrII	593146	596019
ChrII	596992	597671
ChrII	611787	612021
ChrII	690969	691249
ChrII	729558	731825
ChrII	759140	759444
ChrII	790634	790843
ChrII	815425	815705
ChrII	831626	833115
ChrII	864762	865883
ChrII	874000	874200
ChrII	939706	939946
ChrII	975245	975979
ChrII	1044535	1045289
ChrII	1064684	1065096
ChrII	1073013	1074776
ChrII	1079683	1081064
ChrII	1097241	1098223
ChrII	1101355	1102817
ChrII	1107644	1108262
ChrII	1116599	1117133
ChrII	1131226	1132091
ChrII	1137497	1137912
ChrII	1187110	1188393
ChrII	1236920	1237212
ChrII	1431873	1433124
ChrII	1479679	1482057
ChrII	1486038	1486334
ChrII	1498145	1499220
ChrII	1504605	1505018
ChrII	1510692	1511292
ChrII	1542824	1544322
ChrII	1649741	1651863
ChrII	1780785	1781330
ChrII	1782475	1783034
ChrII	1846228	1846428
ChrII	1858850	1859730
ChrII	1901344	1902039
ChrII	1906686	1907321
ChrII	1909662	1910561
ChrII	1932944	1933772
ChrII	2010322	2011917
ChrII	2040581	2040870
ChrII	2055224	2055558
ChrII	2056557	2071061
ChrII	2077983	2078400
ChrII	2079426	2080301
ChrII	2109423	2109931
ChrII	2129817	2130796
ChrII	2322872	2323613
ChrII	2334415	2334750
ChrII	2335567	2336528
ChrII	2337960	2339893
ChrII	2380129	2380724
ChrII	2423840	2424129
ChrII	2526859	2528090
ChrII	2577312	2578156
ChrII	2593418	2593815
ChrII	2600630	2600830
ChrII	2610766	2613278
ChrII	2615099	2616028
ChrII	2617654	2618400
ChrII	2620396	2621156
ChrII	2623591	2624365
ChrII	2628790	2629235
ChrII	2642433	2642693
ChrII	2655737	2656025
ChrII	2762649	2763035
ChrII	2772978	2773178
ChrII	2807237	2807733
ChrII	2814256	2814567
ChrII	2852496	2853049
ChrII	2870075	2870754
ChrII	2899582	2900777
ChrII	3207654	3209224
ChrII	3315533	3315864
ChrII	3332726	3333776
ChrII	3341981	3342350
ChrII	3352442	3352816
ChrII	3357824	3358639
ChrII	3370274	3371375
ChrII	3462318	3463136
ChrII	3549020	3549385
ChrII	3553527	3555175
ChrII	3574486	3575261
ChrII	3579537	3579748
ChrII	3582855	3587308
ChrII	3644081	3645036
ChrII	3649103	3650041
ChrII	3669007	3669271
ChrII	3799345	3802043
ChrII	3805828	3807185
ChrII	3809325	3809833
ChrII	3814236	3814788
ChrII	3816750	3816950
ChrII	3887626	3888442
ChrII	3923371	3924828
ChrII	3928734	3929050
ChrII	3937891	3938251
ChrII	3943205	3943977
ChrII	4005500	4006512
ChrII	4014705	4015027
ChrII	4089141	4089478
ChrII	4188035	4188635
ChrII	4192909	4196648
ChrII	4202298	4202518
ChrII	4224024	4224686
ChrII	4230095	4236761
ChrII	4237847	4239092
ChrII	4240043	4246172
ChrII	4261963	4262825
ChrII	4622692	4624436
ChrII	4654344	4655361
ChrII	4657708	4659486
ChrII	4723949	4724503
ChrII	4728097	4728500
ChrII	4730854	4731589
ChrII	4784235	4785716
ChrII	4806018	4806605
ChrII	4856160	4856867
ChrII	4858986	4860479
ChrII	4871054	4871366
ChrII	4896470	4896841
ChrII	4933123	4933953
ChrII	4935707	4936555
ChrII	4956044	4957217
ChrII	5017117	5018124
ChrII	5020297	5022083
ChrII	5024453	5026133
ChrII	5026943	5027563
ChrII	5029440	5033460
ChrII	5036117	5037134
ChrII	5038182	5039219
ChrII	5040134	5040986
ChrII	5042082	5043156
ChrII	5045678	5047835
ChrII	5050396	5052789
ChrII	5053877	5054241
ChrII	5058357	5059384
ChrII	5060463	5060951
ChrII	5097442	5097942
ChrII	5141102	5141756
ChrII	5144126	5145977
ChrII	5147301	5147996
ChrII	5151305	5152418
ChrII	5159580	5160062
ChrII	5187832	5188183
ChrII	5190520	5190720
ChrII	5199100	5200136
ChrII	5203122	5206315
ChrII	5214413	5214954
ChrII	5217181	5218325
ChrII	5221613	5222155
ChrII	5229479	5229754
ChrII	5231294	5232201
ChrII	5259409	5259952
ChrII	5269402	5269902
ChrII	5270976	5272572
ChrII	5274963	5275304
ChrII	5282857	5283447
ChrII	5294131	5294906
ChrII	5350821	5351849
ChrII	5437351	5438192
ChrII	5443579	5444217
ChrII	5467394	5467667
ChrII	5468734	5469206
ChrII	5508010	5508308
ChrII	5511572	5512300
ChrII	5554236	5557016
ChrII	5611994	5612194
ChrII	5672108	5672823
ChrII	5717133	5717412
ChrII	5720371	5720908
ChrII	5722459	5722892
ChrII	5725051	5725436
ChrII	5788757	5789654
ChrII	5801382	5802111
ChrII	5971801	5974053
ChrII	5976871	5977972
ChrII	6047983	6049015
ChrII	6062583	6065731
ChrII	6066790	6067468
ChrII	6079269	6079489
ChrII	6081637	6082291
ChrII	6127350	6127705
ChrII	6128929	6130469
ChrII	6137396	6137947
ChrII	6193616	6193871
ChrII	6201334	6203140
ChrII	6247718	6249063
ChrII	6255267	6257239
ChrII	6268025	6268612
ChrII	6274293	6274970
ChrII	6276835	6278114
ChrII	6282662	6284892
ChrII	6289748	6290882
ChrII	6295340	6296543
ChrII	6344499	6344807
ChrII	6349679	6349979
ChrII	6352041	6352353
ChrII	6359991	6360759
ChrII	6363128	6363331
ChrII	6369420	6373199
ChrII	6378957	6379929
ChrII	6385626	6386021
ChrII	6422681	6423371
ChrII	6435833	6436353
ChrII	6442947	6443347
ChrII	6459748	6461448
ChrII	6493356	6497682
ChrII	6520264	6520614
ChrII	6521424	6522358
ChrII	6523258	6524205
ChrII	6525904	6528501
ChrII	6537185	6537941
ChrII	6595903	6596171
ChrII	6603891	6604364
ChrII	6641219	6641611
ChrII	6665505	6666437
ChrII	6667349	6669959
ChrII	6677553	6678270
ChrII	6681877	6682205
ChrII	6697086	6698263
ChrII	6752965	6753468
ChrII	6819181	6819441
ChrII	6861775	6862343
ChrII	6879694	6880303
ChrII	6911097	6911358
ChrII	6959287	6959841
ChrII	6969939	6971095
ChrII	6975534	6976037
ChrII	6976842	6985242
ChrII	6986051	6992710
ChrII	6993686	6994213
ChrII	7054310	7056103
ChrII	7091434	7092476
ChrII	7094252	7094990
ChrII	7101309	7101683
ChrII	7110188	7111059
ChrII	7113655	7114460
ChrII	7143023	7144330
ChrII	7191234	7192345
ChrII	7193368	7193718
ChrII	7207205	7208022
ChrII	7223270	7223470
ChrII	7224467	7225238
ChrII	7227245	7227814
ChrII	7228816	7230834
ChrII	7267807	7268825
ChrII	7271825	7272944
ChrII	7319615	7320221
ChrII	7325445	7326167
ChrII	7367093	7367334
ChrII	7396408	7397264
ChrII	7398894	7399162
ChrII	7410153	7410593
ChrII	7428247	7428747
ChrII	7561344	7564439
ChrII	7578500	7579711
ChrII	7581356	7582424
ChrII	7583832	7584823
ChrII	7593204	7593861
ChrII	7595290	7595951
ChrII	7596834	7598027
ChrII	7600702	7601123
ChrII	7602160	7603629
ChrII	7677872	7678515
ChrII	7682083	7682451
ChrII	7685837	7686729
ChrII	7721727	7722815
ChrII	7795315	7798877
ChrII	7803471	7804289
ChrII	7813102	7814434
ChrII	7831191	7832636
ChrII	7838017	7838497
ChrII	7847085	7847615
ChrII	7852584	7853937
ChrII	7857521	7858017
ChrII	7879403	7879603
ChrII	7884170	7884735
ChrII	7891689	7892034
ChrII	7899154	7901013
ChrII	7904394	7905624
ChrII	7908258	7908605
ChrII	7916344	7917348
ChrII	7918157	7920685
ChrII	7923113	7923434
ChrII	7932788	7933340
ChrII	7934707	7937635
ChrII	7960819	7962083
ChrII	7963072	7963332
ChrII	7972561	7974480
ChrII	7976609	7976935
ChrII	7996393	7997758
ChrII	8006258	8007035
ChrII	8009328	8009691
ChrII	8028125	8028650
ChrII	8048797	8049907
ChrII	8059182	8059768
ChrII	8087913	8089518
ChrII	8124186	8124513
ChrII	8137118	8138090
ChrII	8172119	8172387
ChrII	8183705	8184611
ChrII	8192978	8193323
ChrII	8195436	8196119
ChrII	8217360	8217626
ChrII	8248460	8248980
ChrII	8401769	8404023
ChrII	8405108	8406971
ChrII	8410373	8411571
ChrII	8413824	8414303
ChrII	8428039	8435863
ChrII	8437386	8438533
ChrII	8462764	8464136
ChrII	8478296	8479874
ChrII	8531122	8531468
ChrII	8630383	8632182
[truncated: 4,072 more rows]
