# Supplementary material for: Young genes have distinct gene structure, epigenetic profiles, and transcriptional regulation
Source: HighWire-hosted journal article supplement (doi:10.1101/gr.234872.118), 2018-09-19
Supplement: SupplementalTable2_ChromatinStates.xlsx [file SupplementalTable2_ChromatinStates.xlsx]

## Sheet: Legend
SupplementalTable2: Chromatin States. Chromatin states determined by ChromHMM (Ernst and Kellis 2012) on 6 histone modifications and ATAC-seq. Candidate state annotation and color matching chromatin state number is found in Figure 3.

## Sheet: chromatin_states.txt
Chr	start	stop	chromatin state	misc.	misc.	misc.	misc.	color
ChrI	31400	32200	1	0	.	31400	32200	0,6,21
ChrI	33000	34000	1	0	.	33000	34000	0,6,21
ChrI	48200	49400	1	0	.	48200	49400	0,6,21
ChrI	51800	56000	1	0	.	51800	56000	0,6,21
ChrI	57600	61000	1	0	.	57600	61000	0,6,21
ChrI	139000	141200	1	0	.	139000	141200	0,6,21
ChrI	148200	149600	1	0	.	148200	149600	0,6,21
ChrI	155800	156200	1	0	.	155800	156200	0,6,21
ChrI	157600	157800	1	0	.	157600	157800	0,6,21
ChrI	163800	166200	1	0	.	163800	166200	0,6,21
ChrI	166600	169600	1	0	.	166600	169600	0,6,21
ChrI	172400	172800	1	0	.	172400	172800	0,6,21
ChrI	178000	179400	1	0	.	178000	179400	0,6,21
ChrI	179800	184200	1	0	.	179800	184200	0,6,21
ChrI	184400	185200	1	0	.	184400	185200	0,6,21
ChrI	194800	199000	1	0	.	194800	199000	0,6,21
ChrI	210400	211400	1	0	.	210400	211400	0,6,21
ChrI	213000	215800	1	0	.	213000	215800	0,6,21
ChrI	220400	221200	1	0	.	220400	221200	0,6,21
ChrI	221400	223600	1	0	.	221400	223600	0,6,21
ChrI	224200	225000	1	0	.	224200	225000	0,6,21
ChrI	234000	234200	1	0	.	234000	234200	0,6,21
ChrI	270400	271000	1	0	.	270400	271000	0,6,21
ChrI	271400	272200	1	0	.	271400	272200	0,6,21
ChrI	298000	298400	1	0	.	298000	298400	0,6,21
ChrI	300400	302600	1	0	.	300400	302600	0,6,21
ChrI	303800	308000	1	0	.	303800	308000	0,6,21
ChrI	340000	340400	1	0	.	340000	340400	0,6,21
ChrI	341000	341400	1	0	.	341000	341400	0,6,21
ChrI	350400	350600	1	0	.	350400	350600	0,6,21
ChrI	416000	416800	1	0	.	416000	416800	0,6,21
ChrI	418400	419400	1	0	.	418400	419400	0,6,21
ChrI	421400	422200	1	0	.	421400	422200	0,6,21
ChrI	425000	425400	1	0	.	425000	425400	0,6,21
ChrI	430400	431000	1	0	.	430400	431000	0,6,21
ChrI	431400	434200	1	0	.	431400	434200	0,6,21
ChrI	435600	435800	1	0	.	435600	435800	0,6,21
ChrI	446200	448200	1	0	.	446200	448200	0,6,21
ChrI	509600	510400	1	0	.	509600	510400	0,6,21
ChrI	511000	511400	1	0	.	511000	511400	0,6,21
ChrI	527800	529400	1	0	.	527800	529400	0,6,21
ChrI	530200	532800	1	0	.	530200	532800	0,6,21
ChrI	536000	537000	1	0	.	536000	537000	0,6,21
ChrI	544800	545000	1	0	.	544800	545000	0,6,21
ChrI	594200	594600	1	0	.	594200	594600	0,6,21
ChrI	605800	608600	1	0	.	605800	608600	0,6,21
ChrI	614000	614600	1	0	.	614000	614600	0,6,21
ChrI	615000	616600	1	0	.	615000	616600	0,6,21
ChrI	621800	622400	1	0	.	621800	622400	0,6,21
ChrI	626200	626400	1	0	.	626200	626400	0,6,21
ChrI	666800	668400	1	0	.	666800	668400	0,6,21
ChrI	671600	672000	1	0	.	671600	672000	0,6,21
ChrI	672400	672600	1	0	.	672400	672600	0,6,21
ChrI	698200	699000	1	0	.	698200	699000	0,6,21
ChrI	700600	701000	1	0	.	700600	701000	0,6,21
ChrI	727800	728400	1	0	.	727800	728400	0,6,21
ChrI	736200	737000	1	0	.	736200	737000	0,6,21
ChrI	746400	747400	1	0	.	746400	747400	0,6,21
ChrI	748200	752000	1	0	.	748200	752000	0,6,21
ChrI	762200	763600	1	0	.	762200	763600	0,6,21
ChrI	764800	766600	1	0	.	764800	766600	0,6,21
ChrI	769200	769400	1	0	.	769200	769400	0,6,21
ChrI	770200	771000	1	0	.	770200	771000	0,6,21
ChrI	771800	774200	1	0	.	771800	774200	0,6,21
ChrI	776600	776800	1	0	.	776600	776800	0,6,21
ChrI	778000	778600	1	0	.	778000	778600	0,6,21
ChrI	794400	795000	1	0	.	794400	795000	0,6,21
ChrI	795800	796000	1	0	.	795800	796000	0,6,21
ChrI	801800	802000	1	0	.	801800	802000	0,6,21
ChrI	802400	805000	1	0	.	802400	805000	0,6,21
ChrI	805400	807200	1	0	.	805400	807200	0,6,21
ChrI	807800	808200	1	0	.	807800	808200	0,6,21
ChrI	810600	810800	1	0	.	810600	810800	0,6,21
ChrI	811000	811400	1	0	.	811000	811400	0,6,21
ChrI	820000	820400	1	0	.	820000	820400	0,6,21
ChrI	852000	852800	1	0	.	852000	852800	0,6,21
ChrI	854600	855400	1	0	.	854600	855400	0,6,21
ChrI	858400	858600	1	0	.	858400	858600	0,6,21
ChrI	861400	862600	1	0	.	861400	862600	0,6,21
ChrI	863200	864400	1	0	.	863200	864400	0,6,21
ChrI	898000	899000	1	0	.	898000	899000	0,6,21
ChrI	900000	901400	1	0	.	900000	901400	0,6,21
ChrI	902400	903400	1	0	.	902400	903400	0,6,21
ChrI	904000	905000	1	0	.	904000	905000	0,6,21
ChrI	906600	909200	1	0	.	906600	909200	0,6,21
ChrI	910600	911000	1	0	.	910600	911000	0,6,21
ChrI	912600	913000	1	0	.	912600	913000	0,6,21
ChrI	958600	959000	1	0	.	958600	959000	0,6,21
ChrI	995400	996000	1	0	.	995400	996000	0,6,21
ChrI	998600	999400	1	0	.	998600	999400	0,6,21
ChrI	1005800	1007000	1	0	.	1005800	1007000	0,6,21
ChrI	1007800	1008200	1	0	.	1007800	1008200	0,6,21
ChrI	1008600	1008800	1	0	.	1008600	1008800	0,6,21
ChrI	1014600	1015400	1	0	.	1014600	1015400	0,6,21
ChrI	1026800	1028000	1	0	.	1026800	1028000	0,6,21
ChrI	1028800	1030000	1	0	.	1028800	1030000	0,6,21
ChrI	1035000	1035400	1	0	.	1035000	1035400	0,6,21
ChrI	1036000	1036400	1	0	.	1036000	1036400	0,6,21
ChrI	1055000	1056200	1	0	.	1055000	1056200	0,6,21
ChrI	1068600	1070200	1	0	.	1068600	1070200	0,6,21
ChrI	1084400	1084800	1	0	.	1084400	1084800	0,6,21
ChrI	1088400	1089400	1	0	.	1088400	1089400	0,6,21
ChrI	1111000	1111400	1	0	.	1111000	1111400	0,6,21
ChrI	1125800	1126200	1	0	.	1125800	1126200	0,6,21
ChrI	1127000	1128800	1	0	.	1127000	1128800	0,6,21
ChrI	1131200	1132200	1	0	.	1131200	1132200	0,6,21
ChrI	1134200	1134800	1	0	.	1134200	1134800	0,6,21
ChrI	1137400	1137800	1	0	.	1137400	1137800	0,6,21
ChrI	1138800	1140400	1	0	.	1138800	1140400	0,6,21
ChrI	1174000	1174400	1	0	.	1174000	1174400	0,6,21
ChrI	1213600	1214200	1	0	.	1213600	1214200	0,6,21
ChrI	1215800	1216400	1	0	.	1215800	1216400	0,6,21
ChrI	1218800	1219800	1	0	.	1218800	1219800	0,6,21
ChrI	1302400	1304800	1	0	.	1302400	1304800	0,6,21
ChrI	1307800	1308600	1	0	.	1307800	1308600	0,6,21
ChrI	1324400	1324800	1	0	.	1324400	1324800	0,6,21
ChrI	1331000	1331200	1	0	.	1331000	1331200	0,6,21
ChrI	1353400	1354200	1	0	.	1353400	1354200	0,6,21
ChrI	1355400	1356600	1	0	.	1355400	1356600	0,6,21
ChrI	1357000	1358400	1	0	.	1357000	1358400	0,6,21
ChrI	1390800	1392200	1	0	.	1390800	1392200	0,6,21
ChrI	1404600	1405000	1	0	.	1404600	1405000	0,6,21
ChrI	1408800	1409400	1	0	.	1408800	1409400	0,6,21
ChrI	1437400	1437800	1	0	.	1437400	1437800	0,6,21
ChrI	1445400	1446200	1	0	.	1445400	1446200	0,6,21
ChrI	1451200	1451400	1	0	.	1451200	1451400	0,6,21
ChrI	1456800	1457000	1	0	.	1456800	1457000	0,6,21
ChrI	1488400	1488800	1	0	.	1488400	1488800	0,6,21
ChrI	1490200	1491000	1	0	.	1490200	1491000	0,6,21
ChrI	1539200	1539600	1	0	.	1539200	1539600	0,6,21
ChrI	1540600	1543400	1	0	.	1540600	1543400	0,6,21
ChrI	1547600	1548600	1	0	.	1547600	1548600	0,6,21
ChrI	1572400	1575800	1	0	.	1572400	1575800	0,6,21
ChrI	1586800	1587000	1	0	.	1586800	1587000	0,6,21
ChrI	1592200	1594000	1	0	.	1592200	1594000	0,6,21
ChrI	1597800	1599400	1	0	.	1597800	1599400	0,6,21
ChrI	1600600	1601200	1	0	.	1600600	1601200	0,6,21
ChrI	1601600	1602600	1	0	.	1601600	1602600	0,6,21
ChrI	1604200	1605200	1	0	.	1604200	1605200	0,6,21
ChrI	1605800	1606200	1	0	.	1605800	1606200	0,6,21
ChrI	1613000	1613600	1	0	.	1613000	1613600	0,6,21
ChrI	1633200	1633600	1	0	.	1633200	1633600	0,6,21
ChrI	1637600	1638600	1	0	.	1637600	1638600	0,6,21
ChrI	1640200	1642000	1	0	.	1640200	1642000	0,6,21
ChrI	1642600	1643600	1	0	.	1642600	1643600	0,6,21
ChrI	1652600	1656400	1	0	.	1652600	1656400	0,6,21
ChrI	1657000	1657400	1	0	.	1657000	1657400	0,6,21
ChrI	1658000	1659200	1	0	.	1658000	1659200	0,6,21
ChrI	1661600	1662800	1	0	.	1661600	1662800	0,6,21
ChrI	1667200	1669200	1	0	.	1667200	1669200	0,6,21
ChrI	1669600	1670800	1	0	.	1669600	1670800	0,6,21
ChrI	1708400	1710400	1	0	.	1708400	1710400	0,6,21
ChrI	1714800	1716800	1	0	.	1714800	1716800	0,6,21
ChrI	1731000	1732400	1	0	.	1731000	1732400	0,6,21
ChrI	1744400	1745200	1	0	.	1744400	1745200	0,6,21
ChrI	1783600	1785000	1	0	.	1783600	1785000	0,6,21
ChrI	1788200	1789000	1	0	.	1788200	1789000	0,6,21
ChrI	1789600	1792200	1	0	.	1789600	1792200	0,6,21
ChrI	1792600	1792800	1	0	.	1792600	1792800	0,6,21
ChrI	1793600	1794800	1	0	.	1793600	1794800	0,6,21
ChrI	1818200	1818800	1	0	.	1818200	1818800	0,6,21
ChrI	1856200	1857400	1	0	.	1856200	1857400	0,6,21
ChrI	1859000	1861000	1	0	.	1859000	1861000	0,6,21
ChrI	1861800	1865000	1	0	.	1861800	1865000	0,6,21
ChrI	1876600	1877400	1	0	.	1876600	1877400	0,6,21
ChrI	1879800	1881000	1	0	.	1879800	1881000	0,6,21
ChrI	1888800	1889400	1	0	.	1888800	1889400	0,6,21
ChrI	1911000	1911800	1	0	.	1911000	1911800	0,6,21
ChrI	1921800	1922400	1	0	.	1921800	1922400	0,6,21
ChrI	1930800	1933600	1	0	.	1930800	1933600	0,6,21
ChrI	1949200	1950800	1	0	.	1949200	1950800	0,6,21
ChrI	1951000	1951200	1	0	.	1951000	1951200	0,6,21
ChrI	1951400	1951800	1	0	.	1951400	1951800	0,6,21
ChrI	1952800	1954200	1	0	.	1952800	1954200	0,6,21
ChrI	1961600	1962400	1	0	.	1961600	1962400	0,6,21
ChrI	2038200	2041200	1	0	.	2038200	2041200	0,6,21
ChrI	2068600	2071800	1	0	.	2068600	2071800	0,6,21
ChrI	2077600	2078200	1	0	.	2077600	2078200	0,6,21
ChrI	2079600	2080800	1	0	.	2079600	2080800	0,6,21
ChrI	2104200	2104400	1	0	.	2104200	2104400	0,6,21
ChrI	2106000	2107000	1	0	.	2106000	2107000	0,6,21
ChrI	2107200	2107400	1	0	.	2107200	2107400	0,6,21
ChrI	2115600	2117000	1	0	.	2115600	2117000	0,6,21
ChrI	2145200	2146800	1	0	.	2145200	2146800	0,6,21
ChrI	2148000	2149800	1	0	.	2148000	2149800	0,6,21
ChrI	2157600	2158000	1	0	.	2157600	2158000	0,6,21
ChrI	2160000	2160600	1	0	.	2160000	2160600	0,6,21
ChrI	2187400	2188000	1	0	.	2187400	2188000	0,6,21
ChrI	2199800	2200200	1	0	.	2199800	2200200	0,6,21
ChrI	2202200	2206400	1	0	.	2202200	2206400	0,6,21
ChrI	2208200	2210000	1	0	.	2208200	2210000	0,6,21
ChrI	2226600	2227400	1	0	.	2226600	2227400	0,6,21
ChrI	2254200	2255200	1	0	.	2254200	2255200	0,6,21
ChrI	2256400	2257400	1	0	.	2256400	2257400	0,6,21
ChrI	2262400	2262800	1	0	.	2262400	2262800	0,6,21
ChrI	2281600	2282400	1	0	.	2281600	2282400	0,6,21
ChrI	2283400	2283800	1	0	.	2283400	2283800	0,6,21
ChrI	2289600	2290200	1	0	.	2289600	2290200	0,6,21
ChrI	2313600	2314200	1	0	.	2313600	2314200	0,6,21
ChrI	2326000	2327000	1	0	.	2326000	2327000	0,6,21
ChrI	2355600	2355800	1	0	.	2355600	2355800	0,6,21
ChrI	2392000	2392600	1	0	.	2392000	2392600	0,6,21
ChrI	2393000	2393600	1	0	.	2393000	2393600	0,6,21
ChrI	2417000	2419000	1	0	.	2417000	2419000	0,6,21
ChrI	2423400	2423600	1	0	.	2423400	2423600	0,6,21
ChrI	2436600	2438200	1	0	.	2436600	2438200	0,6,21
ChrI	2487200	2487800	1	0	.	2487200	2487800	0,6,21
ChrI	2489800	2490200	1	0	.	2489800	2490200	0,6,21
ChrI	2491200	2494600	1	0	.	2491200	2494600	0,6,21
ChrI	2513600	2514000	1	0	.	2513600	2514000	0,6,21
ChrI	2514200	2514400	1	0	.	2514200	2514400	0,6,21
ChrI	2520600	2523800	1	0	.	2520600	2523800	0,6,21
ChrI	2524800	2530600	1	0	.	2524800	2530600	0,6,21
ChrI	2532200	2534000	1	0	.	2532200	2534000	0,6,21
ChrI	2566800	2567400	1	0	.	2566800	2567400	0,6,21
ChrI	2573400	2574000	1	0	.	2573400	2574000	0,6,21
ChrI	2578400	2579000	1	0	.	2578400	2579000	0,6,21
ChrI	2612600	2613000	1	0	.	2612600	2613000	0,6,21
ChrI	2613200	2613600	1	0	.	2613200	2613600	0,6,21
ChrI	2616200	2617600	1	0	.	2616200	2617600	0,6,21
ChrI	2617800	2618800	1	0	.	2617800	2618800	0,6,21
ChrI	2619800	2620200	1	0	.	2619800	2620200	0,6,21
ChrI	2623800	2624000	1	0	.	2623800	2624000	0,6,21
ChrI	2625000	2626000	1	0	.	2625000	2626000	0,6,21
ChrI	2627800	2628200	1	0	.	2627800	2628200	0,6,21
ChrI	2628600	2629400	1	0	.	2628600	2629400	0,6,21
ChrI	2630000	2633600	1	0	.	2630000	2633600	0,6,21
ChrI	2635200	2635400	1	0	.	2635200	2635400	0,6,21
ChrI	2636000	2636800	1	0	.	2636000	2636800	0,6,21
ChrI	2649000	2650400	1	0	.	2649000	2650400	0,6,21
ChrI	2651200	2651600	1	0	.	2651200	2651600	0,6,21
ChrI	2654400	2655800	1	0	.	2654400	2655800	0,6,21
ChrI	2656400	2657600	1	0	.	2656400	2657600	0,6,21
ChrI	2660000	2662400	1	0	.	2660000	2662400	0,6,21
ChrI	2689000	2689400	1	0	.	2689000	2689400	0,6,21
ChrI	2689600	2692600	1	0	.	2689600	2692600	0,6,21
ChrI	2694600	2695400	1	0	.	2694600	2695400	0,6,21
ChrI	2697000	2697400	1	0	.	2697000	2697400	0,6,21
ChrI	2700400	2701600	1	0	.	2700400	2701600	0,6,21
ChrI	2705400	2708000	1	0	.	2705400	2708000	0,6,21
ChrI	2708800	2711000	1	0	.	2708800	2711000	0,6,21
ChrI	2712800	2713400	1	0	.	2712800	2713400	0,6,21
ChrI	2716400	2718200	1	0	.	2716400	2718200	0,6,21
ChrI	2718800	2719400	1	0	.	2718800	2719400	0,6,21
ChrI	2734800	2735000	1	0	.	2734800	2735000	0,6,21
ChrI	2738400	2739400	1	0	.	2738400	2739400	0,6,21
ChrI	2758400	2759600	1	0	.	2758400	2759600	0,6,21
ChrI	2782200	2783600	1	0	.	2782200	2783600	0,6,21
ChrI	2788400	2789400	1	0	.	2788400	2789400	0,6,21
ChrI	2864200	2865400	1	0	.	2864200	2865400	0,6,21
ChrI	2866200	2866800	1	0	.	2866200	2866800	0,6,21
ChrI	2876000	2876400	1	0	.	2876000	2876400	0,6,21
ChrI	2887400	2889400	1	0	.	2887400	2889400	0,6,21
ChrI	2889800	2891200	1	0	.	2889800	2891200	0,6,21
ChrI	2895600	2896200	1	0	.	2895600	2896200	0,6,21
ChrI	2914200	2914800	1	0	.	2914200	2914800	0,6,21
ChrI	2915800	2916400	1	0	.	2915800	2916400	0,6,21
ChrI	2919800	2920200	1	0	.	2919800	2920200	0,6,21
ChrI	2921400	2921800	1	0	.	2921400	2921800	0,6,21
ChrI	2930600	2931000	1	0	.	2930600	2931000	0,6,21
ChrI	2931400	2933000	1	0	.	2931400	2933000	0,6,21
ChrI	2933600	2935600	1	0	.	2933600	2935600	0,6,21
ChrI	2942400	2942800	1	0	.	2942400	2942800	0,6,21
ChrI	2992800	2993200	1	0	.	2992800	2993200	0,6,21
ChrI	3000800	3005000	1	0	.	3000800	3005000	0,6,21
ChrI	3005600	3005800	1	0	.	3005600	3005800	0,6,21
ChrI	3006400	3008400	1	0	.	3006400	3008400	0,6,21
ChrI	3019200	3022800	1	0	.	3019200	3022800	0,6,21
ChrI	3023400	3027200	1	0	.	3023400	3027200	0,6,21
ChrI	3030200	3031200	1	0	.	3030200	3031200	0,6,21
ChrI	3031600	3033600	1	0	.	3031600	3033600	0,6,21
ChrI	3036400	3037800	1	0	.	3036400	3037800	0,6,21
ChrI	3040400	3040800	1	0	.	3040400	3040800	0,6,21
ChrI	3053000	3053600	1	0	.	3053000	3053600	0,6,21
ChrI	3054800	3055000	1	0	.	3054800	3055000	0,6,21
ChrI	3055200	3058000	1	0	.	3055200	3058000	0,6,21
ChrI	3059600	3061000	1	0	.	3059600	3061000	0,6,21
ChrI	3084200	3085200	1	0	.	3084200	3085200	0,6,21
ChrI	3087800	3089000	1	0	.	3087800	3089000	0,6,21
ChrI	3091000	3091400	1	0	.	3091000	3091400	0,6,21
ChrI	3095200	3095800	1	0	.	3095200	3095800	0,6,21
ChrI	3129000	3129800	1	0	.	3129000	3129800	0,6,21
ChrI	3133600	3134400	1	0	.	3133600	3134400	0,6,21
ChrI	3143600	3145400	1	0	.	3143600	3145400	0,6,21
ChrI	3153000	3155400	1	0	.	3153000	3155400	0,6,21
ChrI	3156400	3159600	1	0	.	3156400	3159600	0,6,21
ChrI	3160600	3162400	1	0	.	3160600	3162400	0,6,21
ChrI	3163000	3166200	1	0	.	3163000	3166200	0,6,21
ChrI	3170600	3171200	1	0	.	3170600	3171200	0,6,21
ChrI	3172800	3173800	1	0	.	3172800	3173800	0,6,21
ChrI	3175400	3176400	1	0	.	3175400	3176400	0,6,21
ChrI	3183000	3184600	1	0	.	3183000	3184600	0,6,21
ChrI	3194600	3196200	1	0	.	3194600	3196200	0,6,21
ChrI	3199600	3200000	1	0	.	3199600	3200000	0,6,21
ChrI	3200800	3204400	1	0	.	3200800	3204400	0,6,21
ChrI	3243800	3244000	1	0	.	3243800	3244000	0,6,21
ChrI	3266600	3268200	1	0	.	3266600	3268200	0,6,21
ChrI	3269400	3269800	1	0	.	3269400	3269800	0,6,21
ChrI	3289800	3290200	1	0	.	3289800	3290200	0,6,21
ChrI	3291000	3292400	1	0	.	3291000	3292400	0,6,21
ChrI	3302600	3303600	1	0	.	3302600	3303600	0,6,21
ChrI	3305200	3306000	1	0	.	3305200	3306000	0,6,21
ChrI	3309600	3311400	1	0	.	3309600	3311400	0,6,21
ChrI	3315800	3317800	1	0	.	3315800	3317800	0,6,21
ChrI	3335800	3336400	1	0	.	3335800	3336400	0,6,21
ChrI	3337200	3337400	1	0	.	3337200	3337400	0,6,21
ChrI	3337800	3338000	1	0	.	3337800	3338000	0,6,21
ChrI	3339000	3339400	1	0	.	3339000	3339400	0,6,21
ChrI	3340400	3342800	1	0	.	3340400	3342800	0,6,21
ChrI	3354800	3355600	1	0	.	3354800	3355600	0,6,21
ChrI	3371800	3373800	1	0	.	3371800	3373800	0,6,21
ChrI	3385000	3385800	1	0	.	3385000	3385800	0,6,21
ChrI	3391200	3391600	1	0	.	3391200	3391600	0,6,21
ChrI	3392200	3393000	1	0	.	3392200	3393000	0,6,21
ChrI	3395200	3395800	1	0	.	3395200	3395800	0,6,21
ChrI	3396400	3397000	1	0	.	3396400	3397000	0,6,21
ChrI	3398200	3399200	1	0	.	3398200	3399200	0,6,21
ChrI	3400600	3402600	1	0	.	3400600	3402600	0,6,21
ChrI	3404600	3405000	1	0	.	3404600	3405000	0,6,21
ChrI	3405200	3406200	1	0	.	3405200	3406200	0,6,21
ChrI	3407000	3408200	1	0	.	3407000	3408200	0,6,21
ChrI	3409000	3409400	1	0	.	3409000	3409400	0,6,21
ChrI	3411800	3413000	1	0	.	3411800	3413000	0,6,21
ChrI	3414400	3415200	1	0	.	3414400	3415200	0,6,21
ChrI	3416800	3417800	1	0	.	3416800	3417800	0,6,21
ChrI	3421400	3422200	1	0	.	3421400	3422200	0,6,21
ChrI	3427600	3428400	1	0	.	3427600	3428400	0,6,21
ChrI	3430800	3431200	1	0	.	3430800	3431200	0,6,21
ChrI	3440400	3441000	1	0	.	3440400	3441000	0,6,21
ChrI	3483200	3483800	1	0	.	3483200	3483800	0,6,21
ChrI	3507400	3508200	1	0	.	3507400	3508200	0,6,21
ChrI	3533600	3534200	1	0	.	3533600	3534200	0,6,21
ChrI	3535000	3539000	1	0	.	3535000	3539000	0,6,21
ChrI	3539400	3539800	1	0	.	3539400	3539800	0,6,21
ChrI	3542000	3542200	1	0	.	3542000	3542200	0,6,21
ChrI	3594000	3595000	1	0	.	3594000	3595000	0,6,21
ChrI	3602600	3606200	1	0	.	3602600	3606200	0,6,21
ChrI	3622400	3622800	1	0	.	3622400	3622800	0,6,21
ChrI	3623800	3624600	1	0	.	3623800	3624600	0,6,21
ChrI	3634200	3635000	1	0	.	3634200	3635000	0,6,21
ChrI	3637200	3638800	1	0	.	3637200	3638800	0,6,21
ChrI	3642600	3643200	1	0	.	3642600	3643200	0,6,21
ChrI	3650200	3650400	1	0	.	3650200	3650400	0,6,21
ChrI	3671600	3672200	1	0	.	3671600	3672200	0,6,21
ChrI	3672400	3674600	1	0	.	3672400	3674600	0,6,21
ChrI	3676800	3677000	1	0	.	3676800	3677000	0,6,21
ChrI	3677200	3677400	1	0	.	3677200	3677400	0,6,21
ChrI	3680400	3680800	1	0	.	3680400	3680800	0,6,21
ChrI	3684400	3687200	1	0	.	3684400	3687200	0,6,21
ChrI	3715200	3716000	1	0	.	3715200	3716000	0,6,21
ChrI	3727400	3727600	1	0	.	3727400	3727600	0,6,21
ChrI	3733400	3733800	1	0	.	3733400	3733800	0,6,21
ChrI	3735200	3735800	1	0	.	3735200	3735800	0,6,21
ChrI	3736400	3737400	1	0	.	3736400	3737400	0,6,21
ChrI	3737800	3738200	1	0	.	3737800	3738200	0,6,21
ChrI	3740600	3741400	1	0	.	3740600	3741400	0,6,21
ChrI	3743400	3744400	1	0	.	3743400	3744400	0,6,21
ChrI	3752800	3757400	1	0	.	3752800	3757400	0,6,21
ChrI	3762800	3765200	1	0	.	3762800	3765200	0,6,21
ChrI	3765600	3766800	1	0	.	3765600	3766800	0,6,21
ChrI	3767200	3767600	1	0	.	3767200	3767600	0,6,21
ChrI	3768800	3770000	1	0	.	3768800	3770000	0,6,21
ChrI	3770400	3771000	1	0	.	3770400	3771000	0,6,21
ChrI	3788600	3789000	1	0	.	3788600	3789000	0,6,21
ChrI	3799200	3799600	1	0	.	3799200	3799600	0,6,21
ChrI	3818200	3818400	1	0	.	3818200	3818400	0,6,21
ChrI	3906000	3906600	1	0	.	3906000	3906600	0,6,21
ChrI	3921200	3924200	1	0	.	3921200	3924200	0,6,21
ChrI	3927000	3930400	1	0	.	3927000	3930400	0,6,21
ChrI	3931400	3932400	1	0	.	3931400	3932400	0,6,21
ChrI	3933800	3934600	1	0	.	3933800	3934600	0,6,21
ChrI	3936600	3937600	1	0	.	3936600	3937600	0,6,21
ChrI	3954600	3955000	1	0	.	3954600	3955000	0,6,21
ChrI	3955600	3956000	1	0	.	3955600	3956000	0,6,21
ChrI	3995200	3995600	1	0	.	3995200	3995600	0,6,21
ChrI	3996600	3996800	1	0	.	3996600	3996800	0,6,21
ChrI	4095000	4096000	1	0	.	4095000	4096000	0,6,21
ChrI	4162800	4163600	1	0	.	4162800	4163600	0,6,21
ChrI	4170600	4171400	1	0	.	4170600	4171400	0,6,21
ChrI	4222200	4222400	1	0	.	4222200	4222400	0,6,21
ChrI	4251200	4251600	1	0	.	4251200	4251600	0,6,21
ChrI	4277800	4278000	1	0	.	4277800	4278000	0,6,21
ChrI	4286000	4286600	1	0	.	4286000	4286600	0,6,21
ChrI	4288200	4289000	1	0	.	4288200	4289000	0,6,21
ChrI	4312000	4314600	1	0	.	4312000	4314600	0,6,21
ChrI	4316000	4325400	1	0	.	4316000	4325400	0,6,21
ChrI	4326000	4327400	1	0	.	4326000	4327400	0,6,21
ChrI	4332200	4335600	1	0	.	4332200	4335600	0,6,21
ChrI	4335800	4336800	1	0	.	4335800	4336800	0,6,21
ChrI	4337800	4342400	1	0	.	4337800	4342400	0,6,21
ChrI	4342800	4343600	1	0	.	4342800	4343600	0,6,21
ChrI	4344000	4346000	1	0	.	4344000	4346000	0,6,21
ChrI	4347600	4351400	1	0	.	4347600	4351400	0,6,21
ChrI	4375200	4375800	1	0	.	4375200	4375800	0,6,21
ChrI	4393400	4393800	1	0	.	4393400	4393800	0,6,21
ChrI	4490200	4493800	1	0	.	4490200	4493800	0,6,21
ChrI	4501800	4502400	1	0	.	4501800	4502400	0,6,21
ChrI	4511400	4512200	1	0	.	4511400	4512200	0,6,21
ChrI	4514200	4514600	1	0	.	4514200	4514600	0,6,21
ChrI	4542600	4544400	1	0	.	4542600	4544400	0,6,21
ChrI	4561400	4562600	1	0	.	4561400	4562600	0,6,21
ChrI	4568200	4570800	1	0	.	4568200	4570800	0,6,21
ChrI	4597600	4597800	1	0	.	4597600	4597800	0,6,21
ChrI	4598600	4599400	1	0	.	4598600	4599400	0,6,21
ChrI	4600200	4600600	1	0	.	4600200	4600600	0,6,21
ChrI	4624600	4625800	1	0	.	4624600	4625800	0,6,21
ChrI	4626000	4626200	1	0	.	4626000	4626200	0,6,21
ChrI	4627000	4629400	1	0	.	4627000	4629400	0,6,21
ChrI	4631200	4633800	1	0	.	4631200	4633800	0,6,21
ChrI	4634200	4634400	1	0	.	4634200	4634400	0,6,21
ChrI	4644600	4646400	1	0	.	4644600	4646400	0,6,21
ChrI	4665000	4666000	1	0	.	4665000	4666000	0,6,21
ChrI	4667800	4669200	1	0	.	4667800	4669200	0,6,21
ChrI	4702200	4708800	1	0	.	4702200	4708800	0,6,21
ChrI	4710000	4710800	1	0	.	4710000	4710800	0,6,21
ChrI	4734000	4734200	1	0	.	4734000	4734200	0,6,21
ChrI	4786600	4787000	1	0	.	4786600	4787000	0,6,21
ChrI	4811800	4812200	1	0	.	4811800	4812200	0,6,21
ChrI	4812600	4813400	1	0	.	4812600	4813400	0,6,21
ChrI	4814200	4815200	1	0	.	4814200	4815200	0,6,21
ChrI	4834800	4835400	1	0	.	4834800	4835400	0,6,21
ChrI	4836200	4837000	1	0	.	4836200	4837000	0,6,21
ChrI	4838200	4838800	1	0	.	4838200	4838800	0,6,21
ChrI	4839200	4839800	1	0	.	4839200	4839800	0,6,21
ChrI	4843600	4844600	1	0	.	4843600	4844600	0,6,21
ChrI	4896000	4896200	1	0	.	4896000	4896200	0,6,21
ChrI	4902600	4903400	1	0	.	4902600	4903400	0,6,21
ChrI	4909200	4909600	1	0	.	4909200	4909600	0,6,21
ChrI	4913600	4914000	1	0	.	4913600	4914000	0,6,21
ChrI	4915200	4916000	1	0	.	4915200	4916000	0,6,21
ChrI	4918600	4923400	1	0	.	4918600	4923400	0,6,21
ChrI	4924400	4928200	1	0	.	4924400	4928200	0,6,21
ChrI	4932000	4934400	1	0	.	4932000	4934400	0,6,21
ChrI	4934600	4937800	1	0	.	4934600	4937800	0,6,21
ChrI	4944600	4944800	1	0	.	4944600	4944800	0,6,21
ChrI	4945200	4945400	1	0	.	4945200	4945400	0,6,21
ChrI	4956000	4960800	1	0	.	4956000	4960800	0,6,21
ChrI	4965600	4965800	1	0	.	4965600	4965800	0,6,21
ChrI	4987600	4987800	1	0	.	4987600	4987800	0,6,21
ChrI	4988200	4988400	1	0	.	4988200	4988400	0,6,21
ChrI	4990400	4992600	1	0	.	4990400	4992600	0,6,21
ChrI	5018600	5019600	1	0	.	5018600	5019600	0,6,21
ChrI	5039000	5040400	1	0	.	5039000	5040400	0,6,21
ChrI	5040800	5041800	1	0	.	5040800	5041800	0,6,21
ChrI	5066600	5067400	1	0	.	5066600	5067400	0,6,21
ChrI	5079400	5079600	1	0	.	5079400	5079600	0,6,21
ChrI	5080200	5080600	1	0	.	5080200	5080600	0,6,21
ChrI	5088400	5089000	1	0	.	5088400	5089000	0,6,21
ChrI	5089200	5091200	1	0	.	5089200	5091200	0,6,21
ChrI	5092000	5098200	1	0	.	5092000	5098200	0,6,21
ChrI	5105400	5105800	1	0	.	5105400	5105800	0,6,21
ChrI	5124000	5128800	1	0	.	5124000	5128800	0,6,21
ChrI	5129200	5135000	1	0	.	5129200	5135000	0,6,21
ChrI	5135600	5136800	1	0	.	5135600	5136800	0,6,21
ChrI	5140400	5141400	1	0	.	5140400	5141400	0,6,21
ChrI	5150200	5150800	1	0	.	5150200	5150800	0,6,21
ChrI	5152200	5152600	1	0	.	5152200	5152600	0,6,21
ChrI	5191800	5192800	1	0	.	5191800	5192800	0,6,21
ChrI	5194200	5195200	1	0	.	5194200	5195200	0,6,21
ChrI	5253200	5254400	1	0	.	5253200	5254400	0,6,21
ChrI	5255800	5256400	1	0	.	5255800	5256400	0,6,21
ChrI	5279200	5280800	1	0	.	5279200	5280800	0,6,21
ChrI	5286600	5287200	1	0	.	5286600	5287200	0,6,21
ChrI	5288400	5289400	1	0	.	5288400	5289400	0,6,21
ChrI	5304200	5305400	1	0	.	5304200	5305400	0,6,21
ChrI	5305800	5306400	1	0	.	5305800	5306400	0,6,21
ChrI	5312400	5312600	1	0	.	5312400	5312600	0,6,21
ChrI	5317200	5318200	1	0	.	5317200	5318200	0,6,21
ChrI	5319200	5324800	1	0	.	5319200	5324800	0,6,21
ChrI	5353400	5354400	1	0	.	5353400	5354400	0,6,21
ChrI	5355000	5355200	1	0	.	5355000	5355200	0,6,21
ChrI	5405800	5406200	1	0	.	5405800	5406200	0,6,21
ChrI	5431000	5431400	1	0	.	5431000	5431400	0,6,21
ChrI	5469600	5471600	1	0	.	5469600	5471600	0,6,21
ChrI	5472000	5472200	1	0	.	5472000	5472200	0,6,21
ChrI	5472600	5473600	1	0	.	5472600	5473600	0,6,21
ChrI	5475600	5477400	1	0	.	5475600	5477400	0,6,21
ChrI	5478000	5478800	1	0	.	5478000	5478800	0,6,21
ChrI	5479200	5489200	1	0	.	5479200	5489200	0,6,21
ChrI	5490400	5491400	1	0	.	5490400	5491400	0,6,21
ChrI	5535800	5536400	1	0	.	5535800	5536400	0,6,21
ChrI	5551400	5551800	1	0	.	5551400	5551800	0,6,21
ChrI	5553000	5553400	1	0	.	5553000	5553400	0,6,21
ChrI	5577200	5577800	1	0	.	5577200	5577800	0,6,21
ChrI	5582600	5583800	1	0	.	5582600	5583800	0,6,21
ChrI	5585800	5591200	1	0	.	5585800	5591200	0,6,21
ChrI	5596800	5597800	1	0	.	5596800	5597800	0,6,21
ChrI	5598400	5599000	1	0	.	5598400	5599000	0,6,21
ChrI	5609600	5610000	1	0	.	5609600	5610000	0,6,21
ChrI	5618800	5619800	1	0	.	5618800	5619800	0,6,21
ChrI	5621800	5623000	1	0	.	5621800	5623000	0,6,21
ChrI	5625400	5626000	1	0	.	5625400	5626000	0,6,21
ChrI	5627200	5628400	1	0	.	5627200	5628400	0,6,21
ChrI	5630800	5631000	1	0	.	5630800	5631000	0,6,21
ChrI	5634600	5635600	1	0	.	5634600	5635600	0,6,21
ChrI	5642000	5642200	1	0	.	5642000	5642200	0,6,21
ChrI	5649200	5649600	1	0	.	5649200	5649600	0,6,21
ChrI	5678600	5679400	1	0	.	5678600	5679400	0,6,21
ChrI	5703400	5703600	1	0	.	5703400	5703600	0,6,21
ChrI	5752600	5753600	1	0	.	5752600	5753600	0,6,21
ChrI	5762400	5762800	1	0	.	5762400	5762800	0,6,21
ChrI	5771200	5771800	1	0	.	5771200	5771800	0,6,21
ChrI	5775600	5777000	1	0	.	5775600	5777000	0,6,21
ChrI	5777800	5778000	1	0	.	5777800	5778000	0,6,21
ChrI	5783400	5783800	1	0	.	5783400	5783800	0,6,21
ChrI	5786600	5787400	1	0	.	5786600	5787400	0,6,21
ChrI	5787800	5790200	1	0	.	5787800	5790200	0,6,21
ChrI	5794200	5795000	1	0	.	5794200	5795000	0,6,21
ChrI	5798600	5799200	1	0	.	5798600	5799200	0,6,21
ChrI	5807400	5807800	1	0	.	5807400	5807800	0,6,21
ChrI	5809000	5809200	1	0	.	5809000	5809200	0,6,21
ChrI	5820400	5821400	1	0	.	5820400	5821400	0,6,21
ChrI	5822600	5823200	1	0	.	5822600	5823200	0,6,21
ChrI	5888000	5888400	1	0	.	5888000	5888400	0,6,21
ChrI	5892200	5894400	1	0	.	5892200	5894400	0,6,21
ChrI	5895200	5895400	1	0	.	5895200	5895400	0,6,21
ChrI	5896000	5900600	1	0	.	5896000	5900600	0,6,21
ChrI	5902600	5904000	1	0	.	5902600	5904000	0,6,21
ChrI	5910200	5911400	1	0	.	5910200	5911400	0,6,21
ChrI	5924800	5925400	1	0	.	5924800	5925400	0,6,21
ChrI	5926600	5927200	1	0	.	5926600	5927200	0,6,21
ChrI	5927600	5928000	1	0	.	5927600	5928000	0,6,21
ChrI	5929600	5930400	1	0	.	5929600	5930400	0,6,21
ChrI	5933200	5933600	1	0	.	5933200	5933600	0,6,21
ChrI	5934000	5934200	1	0	.	5934000	5934200	0,6,21
ChrI	5934600	5935800	1	0	.	5934600	5935800	0,6,21
ChrI	5936800	5937200	1	0	.	5936800	5937200	0,6,21
ChrI	5944600	5945200	1	0	.	5944600	5945200	0,6,21
ChrI	5948000	5949400	1	0	.	5948000	5949400	0,6,21
ChrI	5950200	5952000	1	0	.	5950200	5952000	0,6,21
ChrI	5963400	5963600	1	0	.	5963400	5963600	0,6,21
ChrI	5963800	5964000	1	0	.	5963800	5964000	0,6,21
ChrI	5994200	5994800	1	0	.	5994200	5994800	0,6,21
ChrI	5996200	5996800	1	0	.	5996200	5996800	0,6,21
ChrI	6002800	6003200	1	0	.	6002800	6003200	0,6,21
ChrI	6031400	6033800	1	0	.	6031400	6033800	0,6,21
ChrI	6038600	6040400	1	0	.	6038600	6040400	0,6,21
ChrI	6042400	6046000	1	0	.	6042400	6046000	0,6,21
ChrI	6047200	6048200	1	0	.	6047200	6048200	0,6,21
ChrI	6050000	6051000	1	0	.	6050000	6051000	0,6,21
ChrI	6062200	6063000	1	0	.	6062200	6063000	0,6,21
ChrI	6064400	6064800	1	0	.	6064400	6064800	0,6,21
ChrI	6069400	6070800	1	0	.	6069400	6070800	0,6,21
ChrI	6076400	6077400	1	0	.	6076400	6077400	0,6,21
ChrI	6078000	6078400	1	0	.	6078000	6078400	0,6,21
ChrI	6081200	6081400	1	0	.	6081200	6081400	0,6,21
ChrI	6082000	6082200	1	0	.	6082000	6082200	0,6,21
ChrI	6084600	6085600	1	0	.	6084600	6085600	0,6,21
ChrI	6098200	6099000	1	0	.	6098200	6099000	0,6,21
ChrI	6100400	6100800	1	0	.	6100400	6100800	0,6,21
ChrI	6101400	6102400	1	0	.	6101400	6102400	0,6,21
ChrI	6105000	6105800	1	0	.	6105000	6105800	0,6,21
ChrI	6113000	6113600	1	0	.	6113000	6113600	0,6,21
ChrI	6114400	6115600	1	0	.	6114400	6115600	0,6,21
ChrI	6156800	6157800	1	0	.	6156800	6157800	0,6,21
ChrI	6162200	6162600	1	0	.	6162200	6162600	0,6,21
ChrI	6216800	6220400	1	0	.	6216800	6220400	0,6,21
ChrI	6221600	6227400	1	0	.	6221600	6227400	0,6,21
ChrI	6227600	6228400	1	0	.	6227600	6228400	0,6,21
ChrI	6229600	6231600	1	0	.	6229600	6231600	0,6,21
ChrI	6233400	6234400	1	0	.	6233400	6234400	0,6,21
ChrI	6234600	6235000	1	0	.	6234600	6235000	0,6,21
ChrI	6235800	6237800	1	0	.	6235800	6237800	0,6,21
ChrI	6239000	6241000	1	0	.	6239000	6241000	0,6,21
ChrI	6248600	6249400	1	0	.	6248600	6249400	0,6,21
ChrI	6254400	6255000	1	0	.	6254400	6255000	0,6,21
ChrI	6260400	6260800	1	0	.	6260400	6260800	0,6,21
ChrI	6268000	6268600	1	0	.	6268000	6268600	0,6,21
ChrI	6269000	6269200	1	0	.	6269000	6269200	0,6,21
ChrI	6270000	6270400	1	0	.	6270000	6270400	0,6,21
ChrI	6271000	6271200	1	0	.	6271000	6271200	0,6,21
ChrI	6271600	6272000	1	0	.	6271600	6272000	0,6,21
ChrI	6289800	6291800	1	0	.	6289800	6291800	0,6,21
ChrI	6292400	6297800	1	0	.	6292400	6297800	0,6,21
ChrI	6298000	6299200	1	0	.	6298000	6299200	0,6,21
ChrI	6299800	6300400	1	0	.	6299800	6300400	0,6,21
ChrI	6324000	6324400	1	0	.	6324000	6324400	0,6,21
ChrI	6327800	6329800	1	0	.	6327800	6329800	0,6,21
ChrI	6332000	6332400	1	0	.	6332000	6332400	0,6,21
ChrI	6350800	6351400	1	0	.	6350800	6351400	0,6,21
ChrI	6352000	6352800	1	0	.	6352000	6352800	0,6,21
ChrI	6353200	6353800	1	0	.	6353200	6353800	0,6,21
ChrI	6355000	6356000	1	0	.	6355000	6356000	0,6,21
ChrI	6356600	6358200	1	0	.	6356600	6358200	0,6,21
ChrI	6359200	6359800	1	0	.	6359200	6359800	0,6,21
ChrI	6383200	6383800	1	0	.	6383200	6383800	0,6,21
ChrI	6385200	6385600	1	0	.	6385200	6385600	0,6,21
ChrI	6390600	6391000	1	0	.	6390600	6391000	0,6,21
ChrI	6405200	6406200	1	0	.	6405200	6406200	0,6,21
ChrI	6415400	6415600	1	0	.	6415400	6415600	0,6,21
ChrI	6418200	6419800	1	0	.	6418200	6419800	0,6,21
ChrI	6429000	6429600	1	0	.	6429000	6429600	0,6,21
ChrI	6430200	6431000	1	0	.	6430200	6431000	0,6,21
ChrI	6438200	6444000	1	0	.	6438200	6444000	0,6,21
ChrI	6447800	6448000	1	0	.	6447800	6448000	0,6,21
ChrI	6450600	6451200	1	0	.	6450600	6451200	0,6,21
ChrI	6457200	6458200	1	0	.	6457200	6458200	0,6,21
ChrI	6458600	6460600	1	0	.	6458600	6460600	0,6,21
ChrI	6505000	6506600	1	0	.	6505000	6506600	0,6,21
ChrI	6510400	6510800	1	0	.	6510400	6510800	0,6,21
ChrI	6536200	6537200	1	0	.	6536200	6537200	0,6,21
ChrI	6537600	6537800	1	0	.	6537600	6537800	0,6,21
ChrI	6538400	6540400	1	0	.	6538400	6540400	0,6,21
ChrI	6542800	6543200	1	0	.	6542800	6543200	0,6,21
ChrI	6576600	6578200	1	0	.	6576600	6578200	0,6,21
ChrI	6579000	6582600	1	0	.	6579000	6582600	0,6,21
ChrI	6583600	6587400	1	0	.	6583600	6587400	0,6,21
ChrI	6591400	6593800	1	0	.	6591400	6593800	0,6,21
ChrI	6651600	6652400	1	0	.	6651600	6652400	0,6,21
ChrI	6654000	6655400	1	0	.	6654000	6655400	0,6,21
ChrI	6706800	6707000	1	0	.	6706800	6707000	0,6,21
ChrI	6711000	6711400	1	0	.	6711000	6711400	0,6,21
ChrI	6713600	6714000	1	0	.	6713600	6714000	0,6,21
ChrI	6715000	6715800	1	0	.	6715000	6715800	0,6,21
ChrI	6745000	6745400	1	0	.	6745000	6745400	0,6,21
ChrI	6748200	6749800	1	0	.	6748200	6749800	0,6,21
ChrI	6752800	6753400	1	0	.	6752800	6753400	0,6,21
ChrI	6777800	6778200	1	0	.	6777800	6778200	0,6,21
ChrI	6779600	6780000	1	0	.	6779600	6780000	0,6,21
ChrI	6781200	6781800	1	0	.	6781200	6781800	0,6,21
ChrI	6793400	6796000	1	0	.	6793400	6796000	0,6,21
ChrI	6839000	6840600	1	0	.	6839000	6840600	0,6,21
ChrI	6847800	6848600	1	0	.	6847800	6848600	0,6,21
ChrI	6857200	6857800	1	0	.	6857200	6857800	0,6,21
ChrI	6865800	6866200	1	0	.	6865800	6866200	0,6,21
ChrI	6867600	6867800	1	0	.	6867600	6867800	0,6,21
ChrI	6872600	6872800	1	0	.	6872600	6872800	0,6,21
ChrI	6873800	6874000	1	0	.	6873800	6874000	0,6,21
ChrI	6874400	6874600	1	0	.	6874400	6874600	0,6,21
ChrI	6875600	6876000	1	0	.	6875600	6876000	0,6,21
ChrI	6881000	6881800	1	0	.	6881000	6881800	0,6,21
ChrI	6882200	6882400	1	0	.	6882200	6882400	0,6,21
ChrI	6884600	6885400	1	0	.	6884600	6885400	0,6,21
ChrI	6903600	6905600	1	0	.	6903600	6905600	0,6,21
ChrI	6909400	6911200	1	0	.	6909400	6911200	0,6,21
ChrI	6923000	6925000	1	0	.	6923000	6925000	0,6,21
ChrI	6932000	6932800	1	0	.	6932000	6932800	0,6,21
ChrI	6933200	6933800	1	0	.	6933200	6933800	0,6,21
ChrI	6956400	6959600	1	0	.	6956400	6959600	0,6,21
ChrI	6965600	6966000	1	0	.	6965600	6966000	0,6,21
ChrI	6969200	6971200	1	0	.	6969200	6971200	0,6,21
ChrI	6972000	6972400	1	0	.	6972000	6972400	0,6,21
ChrI	6980400	6980800	1	0	.	6980400	6980800	0,6,21
ChrI	6987600	6988000	1	0	.	6987600	6988000	0,6,21
ChrI	7028800	7030000	1	0	.	7028800	7030000	0,6,21
ChrI	7047600	7048400	1	0	.	7047600	7048400	0,6,21
ChrI	7118600	7124000	1	0	.	7118600	7124000	0,6,21
ChrI	7125600	7126200	1	0	.	7125600	7126200	0,6,21
ChrI	7131400	7132200	1	0	.	7131400	7132200	0,6,21
ChrI	7136600	7137600	1	0	.	7136600	7137600	0,6,21
ChrI	7157600	7158000	1	0	.	7157600	7158000	0,6,21
ChrI	7158200	7158400	1	0	.	7158200	7158400	0,6,21
ChrI	7160800	7161000	1	0	.	7160800	7161000	0,6,21
ChrI	7194200	7195600	1	0	.	7194200	7195600	0,6,21
ChrI	7199200	7199400	1	0	.	7199200	7199400	0,6,21
ChrI	7202200	7202600	1	0	.	7202200	7202600	0,6,21
ChrI	7204000	7204800	1	0	.	7204000	7204800	0,6,21
ChrI	7218400	7219200	1	0	.	7218400	7219200	0,6,21
ChrI	7224600	7225000	1	0	.	7224600	7225000	0,6,21
ChrI	7226000	7226400	1	0	.	7226000	7226400	0,6,21
ChrI	7227400	7228400	1	0	.	7227400	7228400	0,6,21
ChrI	7243600	7246800	1	0	.	7243600	7246800	0,6,21
ChrI	7247000	7247800	1	0	.	7247000	7247800	0,6,21
ChrI	7249400	7250600	1	0	.	7249400	7250600	0,6,21
ChrI	7258800	7259400	1	0	.	7258800	7259400	0,6,21
ChrI	7261800	7264000	1	0	.	7261800	7264000	0,6,21
ChrI	7265000	7265400	1	0	.	7265000	7265400	0,6,21
ChrI	7266400	7266600	1	0	.	7266400	7266600	0,6,21
ChrI	7296400	7296800	1	0	.	7296400	7296800	0,6,21
ChrI	7311600	7312000	1	0	.	7311600	7312000	0,6,21
ChrI	7316600	7317200	1	0	.	7316600	7317200	0,6,21
ChrI	7318600	7319600	1	0	.	7318600	7319600	0,6,21
ChrI	7320200	7321200	1	0	.	7320200	7321200	0,6,21
ChrI	7322400	7322800	1	0	.	7322400	7322800	0,6,21
ChrI	7347400	7348600	1	0	.	7347400	7348600	0,6,21
ChrI	7356400	7357400	1	0	.	7356400	7357400	0,6,21
ChrI	7372000	7375400	1	0	.	7372000	7375400	0,6,21
ChrI	7376200	7376600	1	0	.	7376200	7376600	0,6,21
ChrI	7397200	7397600	1	0	.	7397200	7397600	0,6,21
ChrI	7421400	7421600	1	0	.	7421400	7421600	0,6,21
ChrI	7422400	7422800	1	0	.	7422400	7422800	0,6,21
ChrI	7427400	7427600	1	0	.	7427400	7427600	0,6,21
ChrI	7429400	7429600	1	0	.	7429400	7429600	0,6,21
ChrI	7430000	7430200	1	0	.	7430000	7430200	0,6,21
ChrI	7447800	7448000	1	0	.	7447800	7448000	0,6,21
ChrI	7448600	7448800	1	0	.	7448600	7448800	0,6,21
ChrI	7449600	7452400	1	0	.	7449600	7452400	0,6,21
ChrI	7453200	7453800	1	0	.	7453200	7453800	0,6,21
ChrI	7512200	7513800	1	0	.	7512200	7513800	0,6,21
ChrI	7522400	7523200	1	0	.	7522400	7523200	0,6,21
ChrI	7523800	7525000	1	0	.	7523800	7525000	0,6,21
ChrI	7527400	7528200	1	0	.	7527400	7528200	0,6,21
ChrI	7528400	7529600	1	0	.	7528400	7529600	0,6,21
ChrI	7530400	7530800	1	0	.	7530400	7530800	0,6,21
ChrI	7531600	7533000	1	0	.	7531600	7533000	0,6,21
ChrI	7534000	7534600	1	0	.	7534000	7534600	0,6,21
ChrI	7535000	7535600	1	0	.	7535000	7535600	0,6,21
ChrI	7536200	7537400	1	0	.	7536200	7537400	0,6,21
ChrI	7540600	7542200	1	0	.	7540600	7542200	0,6,21
ChrI	7544200	7545000	1	0	.	7544200	7545000	0,6,21
ChrI	7547200	7547600	1	0	.	7547200	7547600	0,6,21
ChrI	7560600	7560800	1	0	.	7560600	7560800	0,6,21
ChrI	7578200	7578400	1	0	.	7578200	7578400	0,6,21
ChrI	7579800	7581600	1	0	.	7579800	7581600	0,6,21
ChrI	7583000	7584200	1	0	.	7583000	7584200	0,6,21
ChrI	7585600	7587600	1	0	.	7585600	7587600	0,6,21
ChrI	7588200	7588400	1	0	.	7588200	7588400	0,6,21
ChrI	7588800	7589000	1	0	.	7588800	7589000	0,6,21
ChrI	7601400	7601600	1	0	.	7601400	7601600	0,6,21
ChrI	7608200	7609400	1	0	.	7608200	7609400	0,6,21
ChrI	7610800	7611400	1	0	.	7610800	7611400	0,6,21
ChrI	7612000	7615000	1	0	.	7612000	7615000	0,6,21
ChrI	7615400	7616800	1	0	.	7615400	7616800	0,6,21
ChrI	7619200	7619600	1	0	.	7619200	7619600	0,6,21
ChrI	7620200	7620800	1	0	.	7620200	7620800	0,6,21
ChrI	7630400	7630600	1	0	.	7630400	7630600	0,6,21
ChrI	7712800	7713800	1	0	.	7712800	7713800	0,6,21
ChrI	7749600	7750200	1	0	.	7749600	7750200	0,6,21
ChrI	7753000	7753200	1	0	.	7753000	7753200	0,6,21
ChrI	7760800	7761400	1	0	.	7760800	7761400	0,6,21
ChrI	7764400	7764600	1	0	.	7764400	7764600	0,6,21
ChrI	7768200	7769200	1	0	.	7768200	7769200	0,6,21
ChrI	7769800	7770400	1	0	.	7769800	7770400	0,6,21
ChrI	7776000	7777000	1	0	.	7776000	7777000	0,6,21
ChrI	7790400	7791600	1	0	.	7790400	7791600	0,6,21
ChrI	7811600	7812800	1	0	.	7811600	7812800	0,6,21
ChrI	7820200	7823200	1	0	.	7820200	7823200	0,6,21
ChrI	7835800	7836800	1	0	.	7835800	7836800	0,6,21
ChrI	7848600	7854200	1	0	.	7848600	7854200	0,6,21
ChrI	7854400	7859000	1	0	.	7854400	7859000	0,6,21
ChrI	7859800	7860400	1	0	.	7859800	7860400	0,6,21
ChrI	7862400	7862800	1	0	.	7862400	7862800	0,6,21
ChrI	7882600	7883200	1	0	.	7882600	7883200	0,6,21
ChrI	7883600	7884200	1	0	.	7883600	7884200	0,6,21
ChrI	7892600	7893200	1	0	.	7892600	7893200	0,6,21
ChrI	7907600	7908400	1	0	.	7907600	7908400	0,6,21
ChrI	7949400	7953000	1	0	.	7949400	7953000	0,6,21
ChrI	7964600	7964800	1	0	.	7964600	7964800	0,6,21
ChrI	7972400	7974600	1	0	.	7972400	7974600	0,6,21
ChrI	7985800	7989600	1	0	.	7985800	7989600	0,6,21
ChrI	8015200	8016200	1	0	.	8015200	8016200	0,6,21
ChrI	8017400	8018000	1	0	.	8017400	8018000	0,6,21
ChrI	8034000	8035200	1	0	.	8034000	8035200	0,6,21
ChrI	8036000	8042000	1	0	.	8036000	8042000	0,6,21
ChrI	8070400	8070600	1	0	.	8070400	8070600	0,6,21
ChrI	8100200	8100800	1	0	.	8100200	8100800	0,6,21
ChrI	8110800	8113600	1	0	.	8110800	8113600	0,6,21
ChrI	8114000	8115600	1	0	.	8114000	8115600	0,6,21
ChrI	8116600	8117000	1	0	.	8116600	8117000	0,6,21
ChrI	8135600	8136200	1	0	.	8135600	8136200	0,6,21
ChrI	8139000	8140800	1	0	.	8139000	8140800	0,6,21
ChrI	8147800	8149400	1	0	.	8147800	8149400	0,6,21
ChrI	8161000	8161400	1	0	.	8161000	8161400	0,6,21
ChrI	8165000	8165400	1	0	.	8165000	8165400	0,6,21
ChrI	8167200	8167400	1	0	.	8167200	8167400	0,6,21
ChrI	8168000	8169000	1	0	.	8168000	8169000	0,6,21
ChrI	8170600	8171000	1	0	.	8170600	8171000	0,6,21
ChrI	8173600	8174800	1	0	.	8173600	8174800	0,6,21
ChrI	8179400	8180000	1	0	.	8179400	8180000	0,6,21
ChrI	8180800	8181400	1	0	.	8180800	8181400	0,6,21
ChrI	8187000	8188600	1	0	.	8187000	8188600	0,6,21
ChrI	8189200	8190200	1	0	.	8189200	8190200	0,6,21
ChrI	8191200	8191400	1	0	.	8191200	8191400	0,6,21
ChrI	8191800	8193600	1	0	.	8191800	8193600	0,6,21
ChrI	8196400	8197200	1	0	.	8196400	8197200	0,6,21
ChrI	8198800	8199600	1	0	.	8198800	8199600	0,6,21
ChrI	8206000	8206800	1	0	.	8206000	8206800	0,6,21
ChrI	8209200	8209800	1	0	.	8209200	8209800	0,6,21
ChrI	8211400	8212400	1	0	.	8211400	8212400	0,6,21
ChrI	8213200	8213800	1	0	.	8213200	8213800	0,6,21
ChrI	8214800	8215400	1	0	.	8214800	8215400	0,6,21
ChrI	8225200	8226400	1	0	.	8225200	8226400	0,6,21
ChrI	8227000	8228000	1	0	.	8227000	8228000	0,6,21
ChrI	8238400	8239000	1	0	.	8238400	8239000	0,6,21
ChrI	8262600	8263600	1	0	.	8262600	8263600	0,6,21
ChrI	8274800	8276000	1	0	.	8274800	8276000	0,6,21
ChrI	8280400	8282200	1	0	.	8280400	8282200	0,6,21
ChrI	8310000	8311200	1	0	.	8310000	8311200	0,6,21
ChrI	8311600	8312600	1	0	.	8311600	8312600	0,6,21
ChrI	8316200	8317800	1	0	.	8316200	8317800	0,6,21
ChrI	8318200	8318600	1	0	.	8318200	8318600	0,6,21
ChrI	8321800	8322400	1	0	.	8321800	8322400	0,6,21
ChrI	8325400	8327000	1	0	.	8325400	8327000	0,6,21
ChrI	8336800	8338000	1	0	.	8336800	8338000	0,6,21
ChrI	8341200	8342400	1	0	.	8341200	8342400	0,6,21
ChrI	8343800	8344400	1	0	.	8343800	8344400	0,6,21
ChrI	8365600	8366000	1	0	.	8365600	8366000	0,6,21
ChrI	8405400	8405600	1	0	.	8405400	8405600	0,6,21
ChrI	8406400	8406600	1	0	.	8406400	8406600	0,6,21
ChrI	8446800	8449000	1	0	.	8446800	8449000	0,6,21
ChrI	8647400	8647800	1	0	.	8647400	8647800	0,6,21
ChrI	8664800	8665000	1	0	.	8664800	8665000	0,6,21
ChrI	8667000	8667400	1	0	.	8667000	8667400	0,6,21
ChrI	8700800	8701400	1	0	.	8700800	8701400	0,6,21
ChrI	8708200	8709400	1	0	.	8708200	8709400	0,6,21
ChrI	8711600	8713800	1	0	.	8711600	8713800	0,6,21
ChrI	8717000	8717200	1	0	.	8717000	8717200	0,6,21
ChrI	8717400	8717600	1	0	.	8717400	8717600	0,6,21
ChrI	8739400	8740600	1	0	.	8739400	8740600	0,6,21
ChrI	8749400	8750800	1	0	.	8749400	8750800	0,6,21
ChrI	8764800	8766200	1	0	.	8764800	8766200	0,6,21
ChrI	8768400	8770600	1	0	.	8768400	8770600	0,6,21
ChrI	8784200	8784800	1	0	.	8784200	8784800	0,6,21
ChrI	8785200	8786000	1	0	.	8785200	8786000	0,6,21
ChrI	8796400	8796800	1	0	.	8796400	8796800	0,6,21
ChrI	8807600	8809600	1	0	.	8807600	8809600	0,6,21
ChrI	8814000	8815200	1	0	.	8814000	8815200	0,6,21
ChrI	8820200	8821400	1	0	.	8820200	8821400	0,6,21
ChrI	8824400	8824600	1	0	.	8824400	8824600	0,6,21
ChrI	8828400	8829400	1	0	.	8828400	8829400	0,6,21
ChrI	8829800	8830600	1	0	.	8829800	8830600	0,6,21
ChrI	8853600	8857400	1	0	.	8853600	8857400	0,6,21
ChrI	8863800	8865000	1	0	.	8863800	8865000	0,6,21
ChrI	8881800	8884800	1	0	.	8881800	8884800	0,6,21
ChrI	8885200	8887000	1	0	.	8885200	8887000	0,6,21
ChrI	8887600	8887800	1	0	.	8887600	8887800	0,6,21
ChrI	8888200	8894800	1	0	.	8888200	8894800	0,6,21
ChrI	8899200	8899400	1	0	.	8899200	8899400	0,6,21
ChrI	8900200	8901600	1	0	.	8900200	8901600	0,6,21
ChrI	8907000	8908600	1	0	.	8907000	8908600	0,6,21
ChrI	8913000	8913200	1	0	.	8913000	8913200	0,6,21
ChrI	8913600	8914400	1	0	.	8913600	8914400	0,6,21
ChrI	8922800	8923600	1	0	.	8922800	8923600	0,6,21
ChrI	8943800	8945600	1	0	.	8943800	8945600	0,6,21
ChrI	8946400	8947600	1	0	.	8946400	8947600	0,6,21
ChrI	8953800	8959000	1	0	.	8953800	8959000	0,6,21
ChrI	8974400	8975600	1	0	.	8974400	8975600	0,6,21
ChrI	8976400	8977000	1	0	.	8976400	8977000	0,6,21
ChrI	8980600	8981200	1	0	.	8980600	8981200	0,6,21
ChrI	8982400	8982600	1	0	.	8982400	8982600	0,6,21
ChrI	8983600	8985000	1	0	.	8983600	8985000	0,6,21
ChrI	8985400	8989000	1	0	.	8985400	8989000	0,6,21
ChrI	8992600	8993400	1	0	.	8992600	8993400	0,6,21
ChrI	8994200	8995200	1	0	.	8994200	8995200	0,6,21
ChrI	9005600	9006800	1	0	.	9005600	9006800	0,6,21
ChrI	9007400	9008400	1	0	.	9007400	9008400	0,6,21
ChrI	9009400	9011400	1	0	.	9009400	9011400	0,6,21
ChrI	9028000	9028800	1	0	.	9028000	9028800	0,6,21
ChrI	9041000	9045200	1	0	.	9041000	9045200	0,6,21
ChrI	9072800	9073200	1	0	.	9072800	9073200	0,6,21
ChrI	9073800	9075600	1	0	.	9073800	9075600	0,6,21
ChrI	9087600	9087800	1	0	.	9087600	9087800	0,6,21
ChrI	9104600	9105600	1	0	.	9104600	9105600	0,6,21
ChrI	9106800	9108600	1	0	.	9106800	9108600	0,6,21
ChrI	9109000	9111200	1	0	.	9109000	9111200	0,6,21
ChrI	9112600	9112800	1	0	.	9112600	9112800	0,6,21
ChrI	9117600	9119200	1	0	.	9117600	9119200	0,6,21
ChrI	9137600	9137800	1	0	.	9137600	9137800	0,6,21
ChrI	9138200	9138600	1	0	.	9138200	9138600	0,6,21
ChrI	9139200	9140000	1	0	.	9139200	9140000	0,6,21
ChrI	9141000	9141200	1	0	.	9141000	9141200	0,6,21
ChrI	9141400	9141600	1	0	.	9141400	9141600	0,6,21
ChrI	9159800	9160400	1	0	.	9159800	9160400	0,6,21
ChrI	9168000	9171600	1	0	.	9168000	9171600	0,6,21
ChrI	9179600	9181800	1	0	.	9179600	9181800	0,6,21
ChrI	9184200	9184800	1	0	.	9184200	9184800	0,6,21
ChrI	9199400	9200600	1	0	.	9199400	9200600	0,6,21
ChrI	9200800	9201400	1	0	.	9200800	9201400	0,6,21
ChrI	9213200	9213600	1	0	.	9213200	9213600	0,6,21
ChrI	9214400	9217400	1	0	.	9214400	9217400	0,6,21
ChrI	9217800	9218000	1	0	.	9217800	9218000	0,6,21
ChrI	9221400	9221600	1	0	.	9221400	9221600	0,6,21
ChrI	9226800	9228800	1	0	.	9226800	9228800	0,6,21
ChrI	9239400	9241600	1	0	.	9239400	9241600	0,6,21
ChrI	9242400	9242600	1	0	.	9242400	9242600	0,6,21
ChrI	9253400	9254400	1	0	.	9253400	9254400	0,6,21
ChrI	9254800	9255200	1	0	.	9254800	9255200	0,6,21
ChrI	9270000	9270800	1	0	.	9270000	9270800	0,6,21
ChrI	9272000	9272800	1	0	.	9272000	9272800	0,6,21
ChrI	9286400	9287200	1	0	.	9286400	9287200	0,6,21
ChrI	9295400	9297000	1	0	.	9295400	9297000	0,6,21
ChrI	9298200	9299600	1	0	.	9298200	9299600	0,6,21
ChrI	9301600	9303400	1	0	.	9301600	9303400	0,6,21
ChrI	9307400	9309000	1	0	.	9307400	9309000	0,6,21
ChrI	9316200	9317400	1	0	.	9316200	9317400	0,6,21
ChrI	9336800	9337000	1	0	.	9336800	9337000	0,6,21
ChrI	9341000	9342200	1	0	.	9341000	9342200	0,6,21
ChrI	9343400	9343800	1	0	.	9343400	9343800	0,6,21
ChrI	9348000	9349000	1	0	.	9348000	9349000	0,6,21
ChrI	9349400	9349600	1	0	.	9349400	9349600	0,6,21
ChrI	9359600	9359800	1	0	.	9359600	9359800	0,6,21
ChrI	9360600	9364000	1	0	.	9360600	9364000	0,6,21
ChrI	9365600	9366000	1	0	.	9365600	9366000	0,6,21
ChrI	9366800	9367400	1	0	.	9366800	9367400	0,6,21
ChrI	9371200	9372800	1	0	.	9371200	9372800	0,6,21
ChrI	9378000	9378600	1	0	.	9378000	9378600	0,6,21
ChrI	9421400	9421800	1	0	.	9421400	9421800	0,6,21
ChrI	9475200	9476800	1	0	.	9475200	9476800	0,6,21
ChrI	9478200	9479000	1	0	.	9478200	9479000	0,6,21
ChrI	9479800	9480400	1	0	.	9479800	9480400	0,6,21
ChrI	9486400	9487200	1	0	.	9486400	9487200	0,6,21
ChrI	9503600	9504000	1	0	.	9503600	9504000	0,6,21
ChrI	9510800	9511400	1	0	.	9510800	9511400	0,6,21
ChrI	9513000	9513200	1	0	.	9513000	9513200	0,6,21
ChrI	9515400	9515800	1	0	.	9515400	9515800	0,6,21
ChrI	9520600	9521200	1	0	.	9520600	9521200	0,6,21
ChrI	9533000	9533400	1	0	.	9533000	9533400	0,6,21
ChrI	9533800	9534000	1	0	.	9533800	9534000	0,6,21
ChrI	9537200	9537600	1	0	.	9537200	9537600	0,6,21
ChrI	9538800	9539000	1	0	.	9538800	9539000	0,6,21
ChrI	9540000	9541000	1	0	.	9540000	9541000	0,6,21
ChrI	9542800	9543600	1	0	.	9542800	9543600	0,6,21
ChrI	9547600	9548000	1	0	.	9547600	9548000	0,6,21
ChrI	9555400	9555600	1	0	.	9555400	9555600	0,6,21
ChrI	9571200	9572000	1	0	.	9571200	9572000	0,6,21
ChrI	9572800	9573000	1	0	.	9572800	9573000	0,6,21
ChrI	9576000	9577200	1	0	.	9576000	9577200	0,6,21
ChrI	9586400	9587800	1	0	.	9586400	9587800	0,6,21
ChrI	9596200	9597000	1	0	.	9596200	9597000	0,6,21
ChrI	9599200	9599400	1	0	.	9599200	9599400	0,6,21
ChrI	9601400	9602600	1	0	.	9601400	9602600	0,6,21
ChrI	9604000	9604800	1	0	.	9604000	9604800	0,6,21
ChrI	9621600	9622400	1	0	.	9621600	9622400	0,6,21
ChrI	9623000	9625000	1	0	.	9623000	9625000	0,6,21
ChrI	9628800	9629800	1	0	.	9628800	9629800	0,6,21
ChrI	9636800	9637400	1	0	.	9636800	9637400	0,6,21
ChrI	9669200	9669800	1	0	.	9669200	9669800	0,6,21
ChrI	9678000	9678800	1	0	.	9678000	9678800	0,6,21
ChrI	9679600	9680600	1	0	.	9679600	9680600	0,6,21
ChrI	9693000	9693600	1	0	.	9693000	9693600	0,6,21
ChrI	9708600	9711200	1	0	.	9708600	9711200	0,6,21
ChrI	9713000	9713600	1	0	.	9713000	9713600	0,6,21
ChrI	9714800	9716000	1	0	.	9714800	9716000	0,6,21
ChrI	9716600	9716800	1	0	.	9716600	9716800	0,6,21
ChrI	9717200	9720400	1	0	.	9717200	9720400	0,6,21
ChrI	9723800	9730200	1	0	.	9723800	9730200	0,6,21
ChrI	9730600	9730800	1	0	.	9730600	9730800	0,6,21
ChrI	9731200	9732600	1	0	.	9731200	9732600	0,6,21
ChrI	9733600	9737000	1	0	.	9733600	9737000	0,6,21
ChrI	9738000	9741200	1	0	.	9738000	9741200	0,6,21
ChrI	9750800	9751600	1	0	.	9750800	9751600	0,6,21
ChrI	9753000	9754200	1	0	.	9753000	9754200	0,6,21
ChrI	9756600	9758600	1	0	.	9756600	9758600	0,6,21
ChrI	9760400	9761200	1	0	.	9760400	9761200	0,6,21
ChrI	9761600	9764000	1	0	.	9761600	9764000	0,6,21
ChrI	9764200	9764600	1	0	.	9764200	9764600	0,6,21
ChrI	9766400	9769800	1	0	.	9766400	9769800	0,6,21
ChrI	9772400	9772600	1	0	.	9772400	9772600	0,6,21
ChrI	9773000	9774000	1	0	.	9773000	9774000	0,6,21
ChrI	9782800	9783000	1	0	.	9782800	9783000	0,6,21
ChrI	9789400	9789600	1	0	.	9789400	9789600	0,6,21
ChrI	9791000	9791600	1	0	.	9791000	9791600	0,6,21
ChrI	9792600	9795400	1	0	.	9792600	9795400	0,6,21
ChrI	9802000	9803600	1	0	.	9802000	9803600	0,6,21
ChrI	9805000	9805400	1	0	.	9805000	9805400	0,6,21
ChrI	9808200	9808600	1	0	.	9808200	9808600	0,6,21
ChrI	9826400	9827400	1	0	.	9826400	9827400	0,6,21
ChrI	9830600	9834400	1	0	.	9830600	9834400	0,6,21
ChrI	9834800	9836400	1	0	.	9834800	9836400	0,6,21
ChrI	9845400	9845600	1	0	.	9845400	9845600	0,6,21
ChrI	9845800	9846200	1	0	.	9845800	9846200	0,6,21
ChrI	9846600	9847200	1	0	.	9846600	9847200	0,6,21
ChrI	9868200	9868400	1	0	.	9868200	9868400	0,6,21
ChrI	9869200	9870000	1	0	.	9869200	9870000	0,6,21
ChrI	9879000	9879800	1	0	.	9879000	9879800	0,6,21
ChrI	9885800	9888800	1	0	.	9885800	9888800	0,6,21
ChrI	9889200	9890000	1	0	.	9889200	9890000	0,6,21
ChrI	9891200	9893000	1	0	.	9891200	9893000	0,6,21
ChrI	9907000	9907400	1	0	.	9907000	9907400	0,6,21
ChrI	9908200	9909400	1	0	.	9908200	9909400	0,6,21
ChrI	9918800	9920200	1	0	.	9918800	9920200	0,6,21
ChrI	9920800	9921600	1	0	.	9920800	9921600	0,6,21
ChrI	9925600	9928000	1	0	.	9925600	9928000	0,6,21
ChrI	9928800	9929200	1	0	.	9928800	9929200	0,6,21
ChrI	9932600	9934000	1	0	.	9932600	9934000	0,6,21
ChrI	9934800	9935400	1	0	.	9934800	9935400	0,6,21
ChrI	9935800	9936400	1	0	.	9935800	9936400	0,6,21
ChrI	9943600	9944200	1	0	.	9943600	9944200	0,6,21
ChrI	9945600	9946400	1	0	.	9945600	9946400	0,6,21
ChrI	9949000	9951200	1	0	.	9949000	9951200	0,6,21
ChrI	9960600	9963600	1	0	.	9960600	9963600	0,6,21
ChrI	9963800	9964000	1	0	.	9963800	9964000	0,6,21
ChrI	9968200	9970000	1	0	.	9968200	9970000	0,6,21
ChrI	9980600	9983000	1	0	.	9980600	9983000	0,6,21
ChrI	9993400	9993800	1	0	.	9993400	9993800	0,6,21
ChrI	10006600	10008000	1	0	.	10006600	10008000	0,6,21
ChrI	10008800	10009800	1	0	.	10008800	10009800	0,6,21
ChrI	10012800	10014800	1	0	.	10012800	10014800	0,6,21
ChrI	10015400	10016400	1	0	.	10015400	10016400	0,6,21
ChrI	10044400	10044800	1	0	.	10044400	10044800	0,6,21
ChrI	10053400	10055600	1	0	.	10053400	10055600	0,6,21
ChrI	10068000	10069200	1	0	.	10068000	10069200	0,6,21
ChrI	10070000	10070200	1	0	.	10070000	10070200	0,6,21
ChrI	10070600	10073400	1	0	.	10070600	10073400	0,6,21
ChrI	10091200	10091600	1	0	.	10091200	10091600	0,6,21
ChrI	10092800	10094400	1	0	.	10092800	10094400	0,6,21
ChrI	10095000	10096600	1	0	.	10095000	10096600	0,6,21
ChrI	10101000	10101800	1	0	.	10101000	10101800	0,6,21
ChrI	10107800	10108600	1	0	.	10107800	10108600	0,6,21
ChrI	10121200	10122400	1	0	.	10121200	10122400	0,6,21
ChrI	10123200	10124800	1	0	.	10123200	10124800	0,6,21
ChrI	10125400	10126200	1	0	.	10125400	10126200	0,6,21
ChrI	10129200	10130000	1	0	.	10129200	10130000	0,6,21
ChrI	10136200	10137800	1	0	.	10136200	10137800	0,6,21
ChrI	10203600	10204000	1	0	.	10203600	10204000	0,6,21
ChrI	10224000	10224600	1	0	.	10224000	10224600	0,6,21
ChrI	10227400	10228200	1	0	.	10227400	10228200	0,6,21
ChrI	10229200	10232800	1	0	.	10229200	10232800	0,6,21
ChrI	10249000	10250600	1	0	.	10249000	10250600	0,6,21
ChrI	10252600	10253400	1	0	.	10252600	10253400	0,6,21
ChrI	10293800	10294800	1	0	.	10293800	10294800	0,6,21
ChrI	10296600	10297400	1	0	.	10296600	10297400	0,6,21
ChrI	10301800	10304400	1	0	.	10301800	10304400	0,6,21
ChrI	10310600	10313400	1	0	.	10310600	10313400	0,6,21
ChrI	10313600	10317000	1	0	.	10313600	10317000	0,6,21
ChrI	10317400	10319800	1	0	.	10317400	10319800	0,6,21
ChrI	10320200	10320600	1	0	.	10320200	10320600	0,6,21
ChrI	10347000	10347600	1	0	.	10347000	10347600	0,6,21
ChrI	10349000	10352000	1	0	.	10349000	10352000	0,6,21
ChrI	10357600	10359400	1	0	.	10357600	10359400	0,6,21
ChrI	10381600	10382000	1	0	.	10381600	10382000	0,6,21
ChrI	10385200	10386000	1	0	.	10385200	10386000	0,6,21
ChrI	10390400	10390800	1	0	.	10390400	10390800	0,6,21
ChrI	10394400	10394800	1	0	.	10394400	10394800	0,6,21
ChrI	10395200	10395600	1	0	.	10395200	10395600	0,6,21
ChrI	10396200	10397200	1	0	.	10396200	10397200	0,6,21
ChrI	10399600	10400000	1	0	.	10399600	10400000	0,6,21
ChrI	10440600	10441200	1	0	.	10440600	10441200	0,6,21
ChrI	10487400	10488200	1	0	.	10487400	10488200	0,6,21
ChrI	10490200	10490800	1	0	.	10490200	10490800	0,6,21
ChrI	10493800	10494200	1	0	.	10493800	10494200	0,6,21
ChrI	10510600	10511200	1	0	.	10510600	10511200	0,6,21
ChrI	10511600	10513200	1	0	.	10511600	10513200	0,6,21
ChrI	10568800	10569200	1	0	.	10568800	10569200	0,6,21
ChrI	10569600	10570200	1	0	.	10569600	10570200	0,6,21
ChrI	10570800	10571200	1	0	.	10570800	10571200	0,6,21
ChrI	10579000	10580600	1	0	.	10579000	10580600	0,6,21
ChrI	10581200	10583400	1	0	.	10581200	10583400	0,6,21
ChrI	10591000	10591200	1	0	.	10591000	10591200	0,6,21
ChrI	10640600	10641800	1	0	.	10640600	10641800	0,6,21
ChrI	10668400	10668800	1	0	.	10668400	10668800	0,6,21
ChrI	10687400	10687600	1	0	.	10687400	10687600	0,6,21
ChrI	10688600	10689000	1	0	.	10688600	10689000	0,6,21
ChrI	10689600	10691600	1	0	.	10689600	10691600	0,6,21
ChrI	10692000	10694400	1	0	.	10692000	10694400	0,6,21
ChrI	10700800	10701400	1	0	.	10700800	10701400	0,6,21
ChrI	10710000	10710600	1	0	.	10710000	10710600	0,6,21
ChrI	10712400	10712800	1	0	.	10712400	10712800	0,6,21
ChrI	10717600	10719000	1	0	.	10717600	10719000	0,6,21
ChrI	10720000	10720200	1	0	.	10720000	10720200	0,6,21
ChrI	10720800	10721800	1	0	.	10720800	10721800	0,6,21
ChrI	10727200	10727400	1	0	.	10727200	10727400	0,6,21
ChrI	10728000	10728200	1	0	.	10728000	10728200	0,6,21
ChrI	10731200	10733200	1	0	.	10731200	10733200	0,6,21
ChrI	10735600	10738000	1	0	.	10735600	10738000	0,6,21
ChrI	10748400	10749200	1	0	.	10748400	10749200	0,6,21
ChrI	10750400	10751200	1	0	.	10750400	10751200	0,6,21
ChrI	10756000	10756400	1	0	.	10756000	10756400	0,6,21
ChrI	10764600	10765600	1	0	.	10764600	10765600	0,6,21
ChrI	10784800	10785200	1	0	.	10784800	10785200	0,6,21
ChrI	10789600	10791400	1	0	.	10789600	10791400	0,6,21
ChrI	10791800	10794200	1	0	.	10791800	10794200	0,6,21
ChrI	10794600	10796200	1	0	.	10794600	10796200	0,6,21
ChrI	10797400	10798600	1	0	.	10797400	10798600	0,6,21
ChrI	10799600	10800200	1	0	.	10799600	10800200	0,6,21
ChrI	10801800	10802400	1	0	.	10801800	10802400	0,6,21
ChrI	10802600	10803000	1	0	.	10802600	10803000	0,6,21
ChrI	10804400	10807800	1	0	.	10804400	10807800	0,6,21
ChrI	10810200	10811600	1	0	.	10810200	10811600	0,6,21
ChrI	10876400	10877600	1	0	.	10876400	10877600	0,6,21
ChrI	10881800	10882600	1	0	.	10881800	10882600	0,6,21
ChrI	10883000	10883600	1	0	.	10883000	10883600	0,6,21
ChrI	10886600	10887000	1	0	.	10886600	10887000	0,6,21
ChrI	10887600	10889400	1	0	.	10887600	10889400	0,6,21
ChrI	10904600	10905400	1	0	.	10904600	10905400	0,6,21
ChrI	10906000	10906800	1	0	.	10906000	10906800	0,6,21
ChrI	10954600	10955200	1	0	.	10954600	10955200	0,6,21
ChrI	10955800	10956000	1	0	.	10955800	10956000	0,6,21
ChrI	10960600	10961400	1	0	.	10960600	10961400	0,6,21
ChrI	10971400	10971800	1	0	.	10971400	10971800	0,6,21
ChrI	10984000	10985800	1	0	.	10984000	10985800	0,6,21
ChrI	10999400	11001600	1	0	.	10999400	11001600	0,6,21
ChrI	11003800	11004400	1	0	.	11003800	11004400	0,6,21
ChrI	11006400	11007200	1	0	.	11006400	11007200	0,6,21
ChrI	11036400	11037000	1	0	.	11036400	11037000	0,6,21
ChrI	11052000	11055000	1	0	.	11052000	11055000	0,6,21
ChrI	11057200	11057600	1	0	.	11057200	11057600	0,6,21
ChrI	11062200	11063000	1	0	.	11062200	11063000	0,6,21
ChrI	11113600	11114000	1	0	.	11113600	11114000	0,6,21
ChrI	11117400	11118800	1	0	.	11117400	11118800	0,6,21
ChrI	11122000	11122600	1	0	.	11122000	11122600	0,6,21
ChrI	11127400	11128400	1	0	.	11127400	11128400	0,6,21
ChrI	11138000	11138800	1	0	.	11138000	11138800	0,6,21
ChrI	11139200	11140200	1	0	.	11139200	11140200	0,6,21
ChrI	11140800	11141000	1	0	.	11140800	11141000	0,6,21
ChrI	11141400	11143200	1	0	.	11141400	11143200	0,6,21
ChrI	11148200	11148400	1	0	.	11148200	11148400	0,6,21
ChrI	11149400	11150200	1	0	.	11149400	11150200	0,6,21
ChrI	11167600	11168200	1	0	.	11167600	11168200	0,6,21
ChrI	11170000	11170200	1	0	.	11170000	11170200	0,6,21
ChrI	11178600	11178800	1	0	.	11178600	11178800	0,6,21
ChrI	11221000	11221200	1	0	.	11221000	11221200	0,6,21
ChrI	11223200	11223600	1	0	.	11223200	11223600	0,6,21
ChrI	11230600	11231600	1	0	.	11230600	11231600	0,6,21
ChrI	11258000	11260400	1	0	.	11258000	11260400	0,6,21
ChrI	11260800	11262200	1	0	.	11260800	11262200	0,6,21
ChrI	11276400	11276800	1	0	.	11276400	11276800	0,6,21
ChrI	11330800	11331800	1	0	.	11330800	11331800	0,6,21
ChrI	11332200	11334200	1	0	.	11332200	11334200	0,6,21
ChrI	11343200	11346200	1	0	.	11343200	11346200	0,6,21
ChrI	11347400	11348200	1	0	.	11347400	11348200	0,6,21
ChrI	11349000	11349800	1	0	.	11349000	11349800	0,6,21
ChrI	11356000	11356400	1	0	.	11356000	11356400	0,6,21
ChrI	11357000	11358200	1	0	.	11357000	11358200	0,6,21
ChrI	11358600	11359200	1	0	.	11358600	11359200	0,6,21
ChrI	11360200	11362400	1	0	.	11360200	11362400	0,6,21
ChrI	11363600	11363800	1	0	.	11363600	11363800	0,6,21
ChrI	11364000	11364400	1	0	.	11364000	11364400	0,6,21
ChrI	11382000	11382200	1	0	.	11382000	11382200	0,6,21
ChrI	11382600	11382800	1	0	.	11382600	11382800	0,6,21
ChrI	11384000	11385000	1	0	.	11384000	11385000	0,6,21
ChrI	11387000	11387800	1	0	.	11387000	11387800	0,6,21
ChrI	11388200	11388400	1	0	.	11388200	11388400	0,6,21
ChrI	11389800	11390800	1	0	.	11389800	11390800	0,6,21
ChrI	11394600	11395400	1	0	.	11394600	11395400	0,6,21
ChrI	11396400	11397600	1	0	.	11396400	11397600	0,6,21
ChrI	11406000	11406400	1	0	.	11406000	11406400	0,6,21
ChrI	11408600	11409400	1	0	.	11408600	11409400	0,6,21
ChrI	11412000	11412200	1	0	.	11412000	11412200	0,6,21
ChrI	11431200	11432200	1	0	.	11431200	11432200	0,6,21
ChrI	11436800	11438000	1	0	.	11436800	11438000	0,6,21
ChrI	11438400	11438600	1	0	.	11438400	11438600	0,6,21
ChrI	11440400	11440800	1	0	.	11440400	11440800	0,6,21
ChrI	11500800	11501000	1	0	.	11500800	11501000	0,6,21
ChrI	11501200	11501400	1	0	.	11501200	11501400	0,6,21
ChrI	11520600	11521400	1	0	.	11520600	11521400	0,6,21
ChrI	11538600	11539200	1	0	.	11538600	11539200	0,6,21
ChrI	11540200	11540400	1	0	.	11540200	11540400	0,6,21
ChrI	11548000	11549400	1	0	.	11548000	11549400	0,6,21
ChrI	11558000	11558800	1	0	.	11558000	11558800	0,6,21
ChrI	11562200	11565400	1	0	.	11562200	11565400	0,6,21
ChrI	11565800	11566800	1	0	.	11565800	11566800	0,6,21
ChrI	11567200	11567600	1	0	.	11567200	11567600	0,6,21
ChrI	11568000	11571200	1	0	.	11568000	11571200	0,6,21
ChrI	11575000	11575200	1	0	.	11575000	11575200	0,6,21
ChrI	11575800	11576600	1	0	.	11575800	11576600	0,6,21
ChrI	11577000	11580600	1	0	.	11577000	11580600	0,6,21
ChrI	11581000	11585400	1	0	.	11581000	11585400	0,6,21
ChrI	11585600	11586200	1	0	.	11585600	11586200	0,6,21
ChrI	11601600	11602800	1	0	.	11601600	11602800	0,6,21
ChrI	11618400	11619400	1	0	.	11618400	11619400	0,6,21
ChrI	11621000	11625600	1	0	.	11621000	11625600	0,6,21
ChrI	11626000	11631200	1	0	.	11626000	11631200	0,6,21
ChrI	11637600	11638200	1	0	.	11637600	11638200	0,6,21
ChrI	11662400	11664000	1	0	.	11662400	11664000	0,6,21
ChrI	11669600	11670000	1	0	.	11669600	11670000	0,6,21
ChrI	11694800	11696000	1	0	.	11694800	11696000	0,6,21
ChrI	11697600	11699400	1	0	.	11697600	11699400	0,6,21
ChrI	11726800	11727400	1	0	.	11726800	11727400	0,6,21
ChrI	11744200	11744600	1	0	.	11744200	11744600	0,6,21
ChrI	11747200	11748400	1	0	.	11747200	11748400	0,6,21
ChrI	11757200	11758000	1	0	.	11757200	11758000	0,6,21
ChrI	11767000	11767400	1	0	.	11767000	11767400	0,6,21
ChrI	11769400	11769800	1	0	.	11769400	11769800	0,6,21
ChrI	11784200	11784800	1	0	.	11784200	11784800	0,6,21
ChrI	11789600	11790000	1	0	.	11789600	11790000	0,6,21
ChrI	11791200	11791800	1	0	.	11791200	11791800	0,6,21
ChrI	11797600	11803000	1	0	.	11797600	11803000	0,6,21
ChrI	11807200	11810600	1	0	.	11807200	11810600	0,6,21
ChrI	11811600	11813800	1	0	.	11811600	11813800	0,6,21
ChrI	11815000	11816200	1	0	.	11815000	11816200	0,6,21
ChrI	11830400	11832800	1	0	.	11830400	11832800	0,6,21
ChrI	11844800	11845600	1	0	.	11844800	11845600	0,6,21
ChrI	11846200	11846400	1	0	.	11846200	11846400	0,6,21
ChrI	11847000	11847200	1	0	.	11847000	11847200	0,6,21
ChrI	11854600	11854800	1	0	.	11854600	11854800	0,6,21
ChrI	11860200	11861400	1	0	.	11860200	11861400	0,6,21
ChrI	11870200	11871000	1	0	.	11870200	11871000	0,6,21
ChrI	11876400	11878800	1	0	.	11876400	11878800	0,6,21
ChrI	11899800	11900200	1	0	.	11899800	11900200	0,6,21
ChrI	11903600	11903800	1	0	.	11903600	11903800	0,6,21
ChrI	11904800	11906000	1	0	.	11904800	11906000	0,6,21
ChrI	11906600	11908600	1	0	.	11906600	11908600	0,6,21
ChrI	11923800	11924200	1	0	.	11923800	11924200	0,6,21
ChrI	11932000	11932600	1	0	.	11932000	11932600	0,6,21
ChrI	11938400	11939400	1	0	.	11938400	11939400	0,6,21
ChrI	11940000	11943200	1	0	.	11940000	11943200	0,6,21
ChrI	11946800	11947600	1	0	.	11946800	11947600	0,6,21
ChrI	11961600	11962400	1	0	.	11961600	11962400	0,6,21
ChrI	11963000	11964200	1	0	.	11963000	11964200	0,6,21
ChrI	11971600	11971800	1	0	.	11971600	11971800	0,6,21
ChrI	11977800	11978400	1	0	.	11977800	11978400	0,6,21
ChrI	11978600	11979200	1	0	.	11978600	11979200	0,6,21
ChrI	11987400	11988400	1	0	.	11987400	11988400	0,6,21
ChrI	11990800	11991400	1	0	.	11990800	11991400	0,6,21
ChrI	12008200	12008800	1	0	.	12008200	12008800	0,6,21
ChrI	12009800	12011000	1	0	.	12009800	12011000	0,6,21
ChrI	12024400	12025800	1	0	.	12024400	12025800	0,6,21
ChrI	12029000	12029800	1	0	.	12029000	12029800	0,6,21
ChrI	12040200	12040600	1	0	.	12040200	12040600	0,6,21
ChrI	12064400	12065400	1	0	.	12064400	12065400	0,6,21
ChrI	12070200	12071600	1	0	.	12070200	12071600	0,6,21
ChrI	12074200	12076200	1	0	.	12074200	12076200	0,6,21
ChrI	12077400	12078000	1	0	.	12077400	12078000	0,6,21
ChrI	12078600	12079000	1	0	.	12078600	12079000	0,6,21
ChrI	12085000	12085600	1	0	.	12085000	12085600	0,6,21
ChrI	12087000	12089200	1	0	.	12087000	12089200	0,6,21
ChrI	12090200	12091600	1	0	.	12090200	12091600	0,6,21
ChrI	12092200	12094000	1	0	.	12092200	12094000	0,6,21
ChrI	12098400	12098600	1	0	.	12098400	12098600	0,6,21
ChrI	12112600	12112800	1	0	.	12112600	12112800	0,6,21
ChrI	12116400	12116800	1	0	.	12116400	12116800	0,6,21
ChrI	12123600	12123800	1	0	.	12123600	12123800	0,6,21
ChrI	12125200	12126600	1	0	.	12125200	12126600	0,6,21
ChrI	12133800	12134000	1	0	.	12133800	12134000	0,6,21
ChrI	12145000	12145200	1	0	.	12145000	12145200	0,6,21
ChrI	12145800	12146200	1	0	.	12145800	12146200	0,6,21
ChrI	12148800	12149000	1	0	.	12148800	12149000	0,6,21
ChrI	12151800	12152600	1	0	.	12151800	12152600	0,6,21
ChrI	12173400	12174000	1	0	.	12173400	12174000	0,6,21
ChrI	12185200	12185800	1	0	.	12185200	12185800	0,6,21
ChrI	12197800	12198000	1	0	.	12197800	12198000	0,6,21
ChrI	12207800	12208400	1	0	.	12207800	12208400	0,6,21
ChrI	12213400	12213800	1	0	.	12213400	12213800	0,6,21
ChrI	12214000	12214600	1	0	.	12214000	12214600	0,6,21
ChrI	12215600	12217800	1	0	.	12215600	12217800	0,6,21
ChrI	12221000	12221600	1	0	.	12221000	12221600	0,6,21
ChrI	12222600	12222800	1	0	.	12222600	12222800	0,6,21
ChrI	12226000	12227000	1	0	.	12226000	12227000	0,6,21
ChrI	12233400	12234200	1	0	.	12233400	12234200	0,6,21
ChrI	12236600	12238400	1	0	.	12236600	12238400	0,6,21
ChrI	12239000	12240200	1	0	.	12239000	12240200	0,6,21
ChrI	12258000	12258200	1	0	.	12258000	12258200	0,6,21
ChrI	12259000	12261200	1	0	.	12259000	12261200	0,6,21
ChrI	12265600	12268600	1	0	.	12265600	12268600	0,6,21
ChrI	12274400	12275000	1	0	.	12274400	12275000	0,6,21
ChrI	12281200	12283200	1	0	.	12281200	12283200	0,6,21
ChrI	12287800	12289600	1	0	.	12287800	12289600	0,6,21
ChrI	12293600	12294000	1	0	.	12293600	12294000	0,6,21
ChrI	12297600	12300200	1	0	.	12297600	12300200	0,6,21
ChrI	12310600	12310800	1	0	.	12310600	12310800	0,6,21
ChrI	12313200	12316200	1	0	.	12313200	12316200	0,6,21
ChrI	12317600	12318000	1	0	.	12317600	12318000	0,6,21
ChrI	12319000	12319400	1	0	.	12319000	12319400	0,6,21
ChrI	12321200	12326200	1	0	.	12321200	12326200	0,6,21
ChrI	12350200	12351800	1	0	.	12350200	12351800	0,6,21
ChrI	12355200	12355400	1	0	.	12355200	12355400	0,6,21
ChrI	12355800	12356000	1	0	.	12355800	12356000	0,6,21
ChrI	12358200	12359800	1	0	.	12358200	12359800	0,6,21
ChrI	12360200	12362200	1	0	.	12360200	12362200	0,6,21
ChrI	12363200	12364000	1	0	.	12363200	12364000	0,6,21
ChrI	12369000	12370200	1	0	.	12369000	12370200	0,6,21
ChrI	12382600	12383400	1	0	.	12382600	12383400	0,6,21
ChrI	12383800	12384600	1	0	.	12383800	12384600	0,6,21
ChrI	12407400	12409800	1	0	.	12407400	12409800	0,6,21
ChrI	12429800	12431600	1	0	.	12429800	12431600	0,6,21
ChrI	12432000	12433200	1	0	.	12432000	12433200	0,6,21
ChrI	12436000	12437200	1	0	.	12436000	12437200	0,6,21
ChrI	12459400	12460000	1	0	.	12459400	12460000	0,6,21
ChrI	12460600	12461000	1	0	.	12460600	12461000	0,6,21
ChrI	12469800	12471600	1	0	.	12469800	12471600	0,6,21
ChrI	12476200	12483400	1	0	.	12476200	12483400	0,6,21
ChrI	12483800	12485800	1	0	.	12483800	12485800	0,6,21
ChrI	12486600	12487800	1	0	.	12486600	12487800	0,6,21
ChrI	12491200	12492000	1	0	.	12491200	12492000	0,6,21
ChrI	12492600	12493200	1	0	.	12492600	12493200	0,6,21
ChrI	12494000	12494200	1	0	.	12494000	12494200	0,6,21
ChrI	12500600	12502600	1	0	.	12500600	12502600	0,6,21
ChrI	12505400	12505600	1	0	.	12505400	12505600	0,6,21
ChrI	12511000	12511600	1	0	.	12511000	12511600	0,6,21
ChrI	12513200	12514600	1	0	.	12513200	12514600	0,6,21
ChrI	12516400	12518400	1	0	.	12516400	12518400	0,6,21
ChrI	12527600	12528600	1	0	.	12527600	12528600	0,6,21
ChrI	12533200	12540400	1	0	.	12533200	12540400	0,6,21
ChrI	12540800	12541600	1	0	.	12540800	12541600	0,6,21
ChrI	12542600	12543600	1	0	.	12542600	12543600	0,6,21
ChrI	12544400	12545400	1	0	.	12544400	12545400	0,6,21
ChrI	12546800	12549200	1	0	.	12546800	12549200	0,6,21
ChrI	12549600	12552400	1	0	.	12549600	12552400	0,6,21
ChrI	12568400	12569200	1	0	.	12568400	12569200	0,6,21
ChrI	12570600	12573400	1	0	.	12570600	12573400	0,6,21
ChrI	12577600	12579600	1	0	.	12577600	12579600	0,6,21
ChrI	12587400	12587800	1	0	.	12587400	12587800	0,6,21
ChrI	12600000	12601600	1	0	.	12600000	12601600	0,6,21
ChrI	12604400	12604800	1	0	.	12604400	12604800	0,6,21
ChrI	12620000	12624600	1	0	.	12620000	12624600	0,6,21
ChrI	12625800	12626800	1	0	.	12625800	12626800	0,6,21
ChrI	12640600	12643200	1	0	.	12640600	12643200	0,6,21
ChrI	12643600	12643800	1	0	.	12643600	12643800	0,6,21
ChrI	12647400	12648000	1	0	.	12647400	12648000	0,6,21
ChrI	12648400	12649000	1	0	.	12648400	12649000	0,6,21
ChrI	12669400	12669600	1	0	.	12669400	12669600	0,6,21
ChrI	12670600	12673400	1	0	.	12670600	12673400	0,6,21
ChrI	12673600	12673800	1	0	.	12673600	12673800	0,6,21
ChrI	12674000	12675600	1	0	.	12674000	12675600	0,6,21
ChrI	12701200	12701800	1	0	.	12701200	12701800	0,6,21
ChrI	12702400	12703000	1	0	.	12702400	12703000	0,6,21
ChrI	12705000	12705600	1	0	.	12705000	12705600	0,6,21
ChrI	12709200	12711000	1	0	.	12709200	12711000	0,6,21
ChrI	12718600	12719800	1	0	.	12718600	12719800	0,6,21
ChrI	12738800	12739800	1	0	.	12738800	12739800	0,6,21
ChrI	12745800	12747200	1	0	.	12745800	12747200	0,6,21
ChrI	12784200	12784800	1	0	.	12784200	12784800	0,6,21
ChrI	12788000	12788400	1	0	.	12788000	12788400	0,6,21
ChrI	12789200	12789800	1	0	.	12789200	12789800	0,6,21
ChrI	12801200	12802400	1	0	.	12801200	12802400	0,6,21
ChrI	12806000	12809200	1	0	.	12806000	12809200	0,6,21
ChrI	12817400	12817600	1	0	.	12817400	12817600	0,6,21
ChrI	12824200	12824600	1	0	.	12824200	12824600	0,6,21
ChrI	12829000	12831400	1	0	.	12829000	12831400	0,6,21
ChrI	12836200	12836600	1	0	.	12836200	12836600	0,6,21
ChrI	12842400	12843200	1	0	.	12842400	12843200	0,6,21
ChrI	12845200	12845800	1	0	.	12845200	12845800	0,6,21
ChrI	12865200	12865600	1	0	.	12865200	12865600	0,6,21
ChrI	12865800	12867000	1	0	.	12865800	12867000	0,6,21
ChrI	12867800	12868400	1	0	.	12867800	12868400	0,6,21
ChrI	12880000	12881600	1	0	.	12880000	12881600	0,6,21
ChrI	12921600	12922200	1	0	.	12921600	12922200	0,6,21
ChrI	12929600	12930200	1	0	.	12929600	12930200	0,6,21
ChrI	12955800	12956400	1	0	.	12955800	12956400	0,6,21
ChrI	12957600	12957800	1	0	.	12957600	12957800	0,6,21
ChrI	12960600	12960800	1	0	.	12960600	12960800	0,6,21
ChrI	12961400	12963800	1	0	.	12961400	12963800	0,6,21
ChrI	12976200	12976800	1	0	.	12976200	12976800	0,6,21
ChrI	12979800	12981600	1	0	.	12979800	12981600	0,6,21
ChrI	12982400	12983800	1	0	.	12982400	12983800	0,6,21
ChrI	12985800	12988600	1	0	.	12985800	12988600	0,6,21
ChrI	12989600	12993000	1	0	.	12989600	12993000	0,6,21
ChrI	12993400	12995000	1	0	.	12993400	12995000	0,6,21
ChrI	12995400	12998000	1	0	.	12995400	12998000	0,6,21
ChrI	13000400	13001400	1	0	.	13000400	13001400	0,6,21
ChrI	13014400	13017200	1	0	.	13014400	13017200	0,6,21
ChrI	13021800	13022000	1	0	.	13021800	13022000	0,6,21
ChrI	13022400	13023000	1	0	.	13022400	13023000	0,6,21
ChrI	13024000	13024400	1	0	.	13024000	13024400	0,6,21
ChrI	13032800	13033600	1	0	.	13032800	13033600	0,6,21
ChrI	13046600	13047200	1	0	.	13046600	13047200	0,6,21
ChrI	13048000	13048400	1	0	.	13048000	13048400	0,6,21
ChrI	13049200	13052000	1	0	.	13049200	13052000	0,6,21
ChrI	13054600	13055200	1	0	.	13054600	13055200	0,6,21
ChrI	13055600	13056400	1	0	.	13055600	13056400	0,6,21
ChrI	13067200	13068000	1	0	.	13067200	13068000	0,6,21
ChrI	13075200	13075600	1	0	.	13075200	13075600	0,6,21
ChrI	13076000	13076800	1	0	.	13076000	13076800	0,6,21
ChrI	13086400	13088600	1	0	.	13086400	13088600	0,6,21
ChrI	13118800	13120000	1	0	.	13118800	13120000	0,6,21
ChrI	13121600	13122400	1	0	.	13121600	13122400	0,6,21
ChrI	13125600	13125800	1	0	.	13125600	13125800	0,6,21
ChrI	13148000	13148200	1	0	.	13148000	13148200	0,6,21
ChrI	13165000	13168200	1	0	.	13165000	13168200	0,6,21
ChrI	13170600	13170800	1	0	.	13170600	13170800	0,6,21
ChrI	13179200	13179600	1	0	.	13179200	13179600	0,6,21
ChrI	13184600	13184800	1	0	.	13184600	13184800	0,6,21
ChrI	13185000	13185200	1	0	.	13185000	13185200	0,6,21
ChrI	13194400	13195000	1	0	.	13194400	13195000	0,6,21
ChrI	13202000	13202400	1	0	.	13202000	13202400	0,6,21
ChrI	13207000	13208200	1	0	.	13207000	13208200	0,6,21
ChrI	13212600	13215200	1	0	.	13212600	13215200	0,6,21
ChrI	13216800	13217200	1	0	.	13216800	13217200	0,6,21
ChrI	13223400	13224000	1	0	.	13223400	13224000	0,6,21
ChrI	13224800	13225000	1	0	.	13224800	13225000	0,6,21
ChrI	13228000	13228600	1	0	.	13228000	13228600	0,6,21
ChrI	13231200	13232800	1	0	.	13231200	13232800	0,6,21
ChrI	13233200	13233800	1	0	.	13233200	13233800	0,6,21
ChrI	13234800	13236200	1	0	.	13234800	13236200	0,6,21
ChrI	13244400	13245000	1	0	.	13244400	13245000	0,6,21
ChrI	13248200	13250000	1	0	.	13248200	13250000	0,6,21
ChrI	13254800	13255200	1	0	.	13254800	13255200	0,6,21
ChrI	13255600	13256200	1	0	.	13255600	13256200	0,6,21
ChrI	13258600	13259200	1	0	.	13258600	13259200	0,6,21
ChrI	13261200	13262200	1	0	.	13261200	13262200	0,6,21
ChrI	13296000	13300800	1	0	.	13296000	13300800	0,6,21
ChrI	13301800	13303800	1	0	.	13301800	13303800	0,6,21
ChrI	13305800	13306200	1	0	.	13305800	13306200	0,6,21
ChrI	13306400	13306800	1	0	.	13306400	13306800	0,6,21
ChrI	13307600	13312200	1	0	.	13307600	13312200	0,6,21
ChrI	13321400	13321600	1	0	.	13321400	13321600	0,6,21
ChrI	13324200	13325400	1	0	.	13324200	13325400	0,6,21
ChrI	13327800	13328000	1	0	.	13327800	13328000	0,6,21
ChrI	13332800	13333800	1	0	.	13332800	13333800	0,6,21
ChrI	13338000	13338400	1	0	.	13338000	13338400	0,6,21
ChrI	13342200	13343200	1	0	.	13342200	13343200	0,6,21
ChrI	13344800	13346000	1	0	.	13344800	13346000	0,6,21
ChrI	13346600	13351400	1	0	.	13346600	13351400	0,6,21
ChrI	13355200	13356000	1	0	.	13355200	13356000	0,6,21
ChrI	13366200	13366800	1	0	.	13366200	13366800	0,6,21
ChrI	13386800	13387200	1	0	.	13386800	13387200	0,6,21
ChrI	13389800	13390800	1	0	.	13389800	13390800	0,6,21
ChrI	13398800	13399200	1	0	.	13398800	13399200	0,6,21
ChrI	13401000	13401600	1	0	.	13401000	13401600	0,6,21
ChrI	13404600	13407000	1	0	.	13404600	13407000	0,6,21
ChrI	13409200	13410000	1	0	.	13409200	13410000	0,6,21
ChrI	13411000	13411400	1	0	.	13411000	13411400	0,6,21
ChrI	13416600	13419400	1	0	.	13416600	13419400	0,6,21
ChrI	13422800	13423800	1	0	.	13422800	13423800	0,6,21
ChrI	13448200	13448400	1	0	.	13448200	13448400	0,6,21
ChrI	13460200	13462400	1	0	.	13460200	13462400	0,6,21
ChrI	13462800	13463600	1	0	.	13462800	13463600	0,6,21
ChrI	13470600	13472000	1	0	.	13470600	13472000	0,6,21
ChrI	13474400	13474800	1	0	.	13474400	13474800	0,6,21
ChrI	13475600	13476200	1	0	.	13475600	13476200	0,6,21
ChrI	13478400	13478600	1	0	.	13478400	13478600	0,6,21
ChrI	13479400	13480000	1	0	.	13479400	13480000	0,6,21
ChrI	13481200	13481800	1	0	.	13481200	13481800	0,6,21
ChrI	13483000	13483400	1	0	.	13483000	13483400	0,6,21
ChrI	13487000	13487600	1	0	.	13487000	13487600	0,6,21
ChrI	13497600	13500200	1	0	.	13497600	13500200	0,6,21
ChrI	13501000	13501800	1	0	.	13501000	13501800	0,6,21
ChrI	13502600	13504200	1	0	.	13502600	13504200	0,6,21
ChrI	13508600	13510800	1	0	.	13508600	13510800	0,6,21
ChrI	13515600	13516000	1	0	.	13515600	13516000	0,6,21
ChrI	13516600	13518200	1	0	.	13516600	13518200	0,6,21
ChrI	13520000	13520200	1	0	.	13520000	13520200	0,6,21
ChrI	13586000	13586200	1	0	.	13586000	13586200	0,6,21
ChrI	13587600	13588000	1	0	.	13587600	13588000	0,6,21
ChrI	13592600	13593600	1	0	.	13592600	13593600	0,6,21
ChrI	13610600	13610800	1	0	.	13610600	13610800	0,6,21
ChrI	13645200	13645600	1	0	.	13645200	13645600	0,6,21
ChrI	13646000	13647600	1	0	.	13646000	13647600	0,6,21
ChrI	13661400	13661800	1	0	.	13661400	13661800	0,6,21
ChrI	13688600	13690200	1	0	.	13688600	13690200	0,6,21
ChrI	13705600	13706000	1	0	.	13705600	13706000	0,6,21
ChrI	13707200	13708600	1	0	.	13707200	13708600	0,6,21
ChrI	13710800	13711800	1	0	.	13710800	13711800	0,6,21
ChrI	13712000	13713000	1	0	.	13712000	13713000	0,6,21
ChrI	13715600	13715800	1	0	.	13715600	13715800	0,6,21
ChrI	13723400	13723800	1	0	.	13723400	13723800	0,6,21
ChrI	13724200	13725000	1	0	.	13724200	13725000	0,6,21
ChrI	13725600	13726200	1	0	.	13725600	13726200	0,6,21
ChrI	13728800	13729200	1	0	.	13728800	13729200	0,6,21
ChrI	13751200	13753200	1	0	.	13751200	13753200	0,6,21
ChrI	13776200	13777000	1	0	.	13776200	13777000	0,6,21
ChrI	13789600	13790400	1	0	.	13789600	13790400	0,6,21
ChrI	13804600	13804800	1	0	.	13804600	13804800	0,6,21
ChrI	13806600	13808000	1	0	.	13806600	13808000	0,6,21
ChrI	13812400	13812600	1	0	.	13812400	13812600	0,6,21
ChrI	13814800	13815600	1	0	.	13814800	13815600	0,6,21
ChrI	13817000	13817200	1	0	.	13817000	13817200	0,6,21
ChrI	13817600	13819000	1	0	.	13817600	13819000	0,6,21
ChrI	13819800	13820000	1	0	.	13819800	13820000	0,6,21
ChrI	13837200	13837600	1	0	.	13837200	13837600	0,6,21
ChrI	13838200	13839800	1	0	.	13838200	13839800	0,6,21
ChrI	13840400	13840600	1	0	.	13840400	13840600	0,6,21
ChrI	13843000	13844400	1	0	.	13843000	13844400	0,6,21
ChrI	13846200	13846800	1	0	.	13846200	13846800	0,6,21
ChrI	13848800	13849000	1	0	.	13848800	13849000	0,6,21
ChrI	13854800	13856000	1	0	.	13854800	13856000	0,6,21
ChrI	13858000	13858200	1	0	.	13858000	13858200	0,6,21
ChrI	13860600	13862800	1	0	.	13860600	13862800	0,6,21
ChrI	13916400	13917000	1	0	.	13916400	13917000	0,6,21
ChrI	13918200	13920200	1	0	.	13918200	13920200	0,6,21
ChrI	13926200	13926400	1	0	.	13926200	13926400	0,6,21
ChrI	13928800	13929800	1	0	.	13928800	13929800	0,6,21
ChrI	13959000	13959400	1	0	.	13959000	13959400	0,6,21
ChrI	13960000	13960400	1	0	.	13960000	13960400	0,6,21
ChrI	13964000	13964200	1	0	.	13964000	13964200	0,6,21
ChrI	13981000	13982600	1	0	.	13981000	13982600	0,6,21
ChrI	13983000	13983200	1	0	.	13983000	13983200	0,6,21
ChrI	14011000	14011400	1	0	.	14011000	14011400	0,6,21
ChrI	14038200	14040600	1	0	.	14038200	14040600	0,6,21
ChrI	14041200	14042000	1	0	.	14041200	14042000	0,6,21
ChrI	14045800	14046600	1	0	.	14045800	14046600	0,6,21
ChrI	14048000	14051200	1	0	.	14048000	14051200	0,6,21
ChrI	14053600	14054800	1	0	.	14053600	14054800	0,6,21
ChrI	14055200	14056400	1	0	.	14055200	14056400	0,6,21
ChrI	14057600	14057800	1	0	.	14057600	14057800	0,6,21
ChrI	14071800	14072600	1	0	.	14071800	14072600	0,6,21
ChrI	14090600	14090800	1	0	.	14090600	14090800	0,6,21
ChrI	14092400	14093000	1	0	.	14092400	14093000	0,6,21
ChrI	14095200	14096600	1	0	.	14095200	14096600	0,6,21
ChrI	14128600	14130800	1	0	.	14128600	14130800	0,6,21
ChrI	14138200	14138400	1	0	.	14138200	14138400	0,6,21
ChrI	14140000	14140600	1	0	.	14140000	14140600	0,6,21
ChrI	14176000	14176600	1	0	.	14176000	14176600	0,6,21
ChrI	14180600	14181000	1	0	.	14180600	14181000	0,6,21
ChrI	14197200	14197800	1	0	.	14197200	14197800	0,6,21
ChrI	14235600	14236600	1	0	.	14235600	14236600	0,6,21
ChrI	14247800	14248200	1	0	.	14247800	14248200	0,6,21
ChrI	14248600	14248800	1	0	.	14248600	14248800	0,6,21
ChrI	14250600	14251400	1	0	.	14250600	14251400	0,6,21
ChrI	14254400	14254600	1	0	.	14254400	14254600	0,6,21
ChrI	14265000	14265600	1	0	.	14265000	14265600	0,6,21
ChrI	14269600	14270400	1	0	.	14269600	14270400	0,6,21
ChrI	14271000	14272200	1	0	.	14271000	14272200	0,6,21
ChrI	14290600	14291800	1	0	.	14290600	14291800	0,6,21
ChrI	14292200	14294400	1	0	.	14292200	14294400	0,6,21
ChrI	14299200	14299600	1	0	.	14299200	14299600	0,6,21
ChrI	14300600	14301000	1	0	.	14300600	14301000	0,6,21
ChrI	14315600	14315800	1	0	.	14315600	14315800	0,6,21
ChrI	14319200	14320400	1	0	.	14319200	14320400	0,6,21
ChrI	14334000	14334400	1	0	.	14334000	14334400	0,6,21
ChrI	14334800	14335600	1	0	.	14334800	14335600	0,6,21
ChrI	14350400	14351800	1	0	.	14350400	14351800	0,6,21
ChrI	14369400	14370400	1	0	.	14369400	14370400	0,6,21
ChrI	14372200	14375800	1	0	.	14372200	14375800	0,6,21
ChrI	14378600	14379400	1	0	.	14378600	14379400	0,6,21
ChrI	14380800	14383800	1	0	.	14380800	14383800	0,6,21
ChrI	14387800	14388800	1	0	.	14387800	14388800	0,6,21
ChrI	14398200	14398600	1	0	.	14398200	14398600	0,6,21
ChrI	14418600	14419000	1	0	.	14418600	14419000	0,6,21
ChrI	14420600	14426600	1	0	.	14420600	14426600	0,6,21
ChrI	14427400	14428600	1	0	.	14427400	14428600	0,6,21
ChrI	14439000	14441000	1	0	.	14439000	14441000	0,6,21
ChrI	14445200	14446200	1	0	.	14445200	14446200	0,6,21
ChrI	14447000	14449600	1	0	.	14447000	14449600	0,6,21
ChrI	14460400	14461600	1	0	.	14460400	14461600	0,6,21
ChrI	14487600	14487800	1	0	.	14487600	14487800	0,6,21
ChrI	14489400	14491400	1	0	.	14489400	14491400	0,6,21
ChrI	14496400	14496800	1	0	.	14496400	14496800	0,6,21
ChrI	14513400	14516200	1	0	.	14513400	14516200	0,6,21
ChrI	14517600	14518800	1	0	.	14517600	14518800	0,6,21
ChrI	14526200	14530600	1	0	.	14526200	14530600	0,6,21
ChrI	14563400	14564000	1	0	.	14563400	14564000	0,6,21
ChrI	14569400	14570200	1	0	.	14569400	14570200	0,6,21
ChrI	14571800	14577400	1	0	.	14571800	14577400	0,6,21
ChrI	14603200	14608400	1	0	.	14603200	14608400	0,6,21
ChrI	14608800	14609400	1	0	.	14608800	14609400	0,6,21
ChrI	14619200	14619600	1	0	.	14619200	14619600	0,6,21
ChrI	14620000	14620400	1	0	.	14620000	14620400	0,6,21
ChrI	14637600	14640000	1	0	.	14637600	14640000	0,6,21
ChrI	14646200	14646800	1	0	.	14646200	14646800	0,6,21
ChrI	14663200	14664000	1	0	.	14663200	14664000	0,6,21
ChrI	14732400	14733000	1	0	.	14732400	14733000	0,6,21
ChrI	14734600	14737600	1	0	.	14734600	14737600	0,6,21
ChrI	14742800	14743400	1	0	.	14742800	14743400	0,6,21
ChrI	14747000	14748400	1	0	.	14747000	14748400	0,6,21
ChrI	14749000	14750200	1	0	.	14749000	14750200	0,6,21
ChrI	14754200	14760000	1	0	.	14754200	14760000	0,6,21
ChrI	14760800	14761200	1	0	.	14760800	14761200	0,6,21
ChrI	14769400	14770200	1	0	.	14769400	14770200	0,6,21
ChrI	14770800	14772200	1	0	.	14770800	14772200	0,6,21
ChrI	14777400	14777600	1	0	.	14777400	14777600	0,6,21
ChrI	14795200	14795400	1	0	.	14795200	14795400	0,6,21
ChrI	14797200	14798200	1	0	.	14797200	14798200	0,6,21
ChrI	14798800	14799200	1	0	.	14798800	14799200	0,6,21
ChrI	14801200	14802200	1	0	.	14801200	14802200	0,6,21
ChrI	14802400	14802600	1	0	.	14802400	14802600	0,6,21
ChrI	14804600	14805600	1	0	.	14804600	14805600	0,6,21
ChrI	14809400	14810600	1	0	.	14809400	14810600	0,6,21
ChrI	14811400	14812000	1	0	.	14811400	14812000	0,6,21
ChrI	14840000	14840200	1	0	.	14840000	14840200	0,6,21
ChrI	14842400	14843600	1	0	.	14842400	14843600	0,6,21
ChrI	14846600	14847000	1	0	.	14846600	14847000	0,6,21
ChrI	14853600	14859200	1	0	.	14853600	14859200	0,6,21
ChrI	14868800	14869600	1	0	.	14868800	14869600	0,6,21
ChrI	14890400	14892800	1	0	.	14890400	14892800	0,6,21
ChrI	14893200	14894600	1	0	.	14893200	14894600	0,6,21
ChrI	14895400	14895600	1	0	.	14895400	14895600	0,6,21
ChrI	14895800	14896800	1	0	.	14895800	14896800	0,6,21
ChrI	14902000	14911200	1	0	.	14902000	14911200	0,6,21
ChrI	14915400	14915800	1	0	.	14915400	14915800	0,6,21
ChrI	14918200	14918800	1	0	.	14918200	14918800	0,6,21
ChrI	14925200	14925600	1	0	.	14925200	14925600	0,6,21
ChrI	14926000	14927200	1	0	.	14926000	14927200	0,6,21
ChrI	14928000	14930400	1	0	.	14928000	14930400	0,6,21
ChrI	14931000	14932200	1	0	.	14931000	14932200	0,6,21
ChrI	14937000	14938000	1	0	.	14937000	14938000	0,6,21
ChrI	14938600	14938800	1	0	.	14938600	14938800	0,6,21
ChrI	14943000	14943800	1	0	.	14943000	14943800	0,6,21
ChrI	14945000	14946200	1	0	.	14945000	14946200	0,6,21
ChrI	14946600	14948000	1	0	.	14946600	14948000	0,6,21
ChrI	14951000	14951200	1	0	.	14951000	14951200	0,6,21
ChrI	14951800	14956400	1	0	.	14951800	14956400	0,6,21
ChrI	14957400	14962200	1	0	.	14957400	14962200	0,6,21
ChrI	14978400	14979000	1	0	.	14978400	14979000	0,6,21
ChrI	14986200	14986600	1	0	.	14986200	14986600	0,6,21
ChrI	14991400	14993200	1	0	.	14991400	14993200	0,6,21
ChrI	15001800	15002400	1	0	.	15001800	15002400	0,6,21
ChrI	15007800	15008000	1	0	.	15007800	15008000	0,6,21
ChrI	15037600	15038800	1	0	.	15037600	15038800	0,6,21
ChrI	15039600	15040400	1	0	.	15039600	15040400	0,6,21
ChrI	15040800	15041000	1	0	.	15040800	15041000	0,6,21
ChrI	15041800	15048600	1	0	.	15041800	15048600	0,6,21
ChrI	15052600	15053000	1	0	.	15052600	15053000	0,6,21
ChrI	15054600	15055800	1	0	.	15054600	15055800	0,6,21
ChrI	15066200	15066800	1	0	.	15066200	15066800	0,6,21
ChrI	15067200	15071400	1	0	.	15067200	15071400	0,6,21
ChrI	15071800	15075400	1	0	.	15071800	15075400	0,6,21
ChrI	15076600	15077600	1	0	.	15076600	15077600	0,6,21
ChrI	15078200	15080000	1	0	.	15078200	15080000	0,6,21
ChrI	15081600	15083600	1	0	.	15081600	15083600	0,6,21
ChrI	15090400	15091400	1	0	.	15090400	15091400	0,6,21
ChrI	15091800	15093000	1	0	.	15091800	15093000	0,6,21
ChrI	15094000	15097200	1	0	.	15094000	15097200	0,6,21
ChrI	15100800	15102600	1	0	.	15100800	15102600	0,6,21
ChrI	15105600	15106400	1	0	.	15105600	15106400	0,6,21
ChrI	15107200	15107600	1	0	.	15107200	15107600	0,6,21
ChrI	15109200	15109400	1	0	.	15109200	15109400	0,6,21
ChrI	15109800	15110800	1	0	.	15109800	15110800	0,6,21
ChrI	15111600	15112000	1	0	.	15111600	15112000	0,6,21
ChrI	15118600	15119400	1	0	.	15118600	15119400	0,6,21
ChrI	15125200	15125600	1	0	.	15125200	15125600	0,6,21
ChrI	15162000	15162600	1	0	.	15162000	15162600	0,6,21
ChrI	15163200	15163600	1	0	.	15163200	15163600	0,6,21
ChrI	15168000	15169000	1	0	.	15168000	15169000	0,6,21
ChrI	15169600	15171200	1	0	.	15169600	15171200	0,6,21
ChrI	15176800	15177800	1	0	.	15176800	15177800	0,6,21
ChrI	15179200	15180000	1	0	.	15179200	15180000	0,6,21
ChrI	15184000	15184400	1	0	.	15184000	15184400	0,6,21
ChrI	15185800	15186800	1	0	.	15185800	15186800	0,6,21
ChrI	15190200	15191200	1	0	.	15190200	15191200	0,6,21
ChrI	15199200	15200000	1	0	.	15199200	15200000	0,6,21
ChrI	15204000	15205000	1	0	.	15204000	15205000	0,6,21
ChrI	15206200	15206600	1	0	.	15206200	15206600	0,6,21
ChrI	15207000	15207600	1	0	.	15207000	15207600	0,6,21
ChrI	15208800	15209200	1	0	.	15208800	15209200	0,6,21
ChrI	15217800	15218400	1	0	.	15217800	15218400	0,6,21
ChrI	15219200	15222200	1	0	.	15219200	15222200	0,6,21
ChrI	15223000	15226000	1	0	.	15223000	15226000	0,6,21
ChrI	15237400	15240000	1	0	.	15237400	15240000	0,6,21
ChrI	15240400	15241800	1	0	.	15240400	15241800	0,6,21
ChrI	15242200	15243600	1	0	.	15242200	15243600	0,6,21
ChrI	15244600	15246800	1	0	.	15244600	15246800	0,6,21
ChrI	15247200	15248600	1	0	.	15247200	15248600	0,6,21
ChrI	15249200	15249600	1	0	.	15249200	15249600	0,6,21
ChrI	15254400	15257200	1	0	.	15254400	15257200	0,6,21
ChrI	15258000	15259000	1	0	.	15258000	15259000	0,6,21
ChrI	15265200	15265400	1	0	.	15265200	15265400	0,6,21
ChrI	15268200	15268800	1	0	.	15268200	15268800	0,6,21
ChrI	15269200	15269800	1	0	.	15269200	15269800	0,6,21
ChrI	15273800	15275200	1	0	.	15273800	15275200	0,6,21
ChrI	15275800	15276000	1	0	.	15275800	15276000	0,6,21
ChrI	15279800	15282000	1	0	.	15279800	15282000	0,6,21
ChrI	15282600	15283400	1	0	.	15282600	15283400	0,6,21
ChrI	15283800	15284000	1	0	.	15283800	15284000	0,6,21
ChrI	15284400	15284800	1	0	.	15284400	15284800	0,6,21
ChrI	15286600	15287400	1	0	.	15286600	15287400	0,6,21
ChrI	15289800	15290400	1	0	.	15289800	15290400	0,6,21
ChrI	15292800	15294000	1	0	.	15292800	15294000	0,6,21
ChrI	15304600	15305600	1	0	.	15304600	15305600	0,6,21
ChrI	15346000	15348200	1	0	.	15346000	15348200	0,6,21
ChrI	15351200	15351800	1	0	.	15351200	15351800	0,6,21
ChrI	15352800	15353600	1	0	.	15352800	15353600	0,6,21
ChrI	15356600	15357000	1	0	.	15356600	15357000	0,6,21
ChrI	15359800	15361000	1	0	.	15359800	15361000	0,6,21
ChrI	15361600	15362200	1	0	.	15361600	15362200	0,6,21
ChrI	15362800	15365800	1	0	.	15362800	15365800	0,6,21
ChrI	15367600	15368600	1	0	.	15367600	15368600	0,6,21
ChrI	15371400	15376800	1	0	.	15371400	15376800	0,6,21
ChrI	15393400	15394400	1	0	.	15393400	15394400	0,6,21
ChrI	15395000	15395800	1	0	.	15395000	15395800	0,6,21
ChrI	15408800	15414400	1	0	.	15408800	15414400	0,6,21
ChrI	15414800	15415200	1	0	.	15414800	15415200	0,6,21
ChrI	15430600	15431400	1	0	.	15430600	15431400	0,6,21
ChrI	15432600	15433200	1	0	.	15432600	15433200	0,6,21
ChrI	15464800	15466000	1	0	.	15464800	15466000	0,6,21
ChrI	15466400	15466800	1	0	.	15466400	15466800	0,6,21
ChrI	15483000	15483400	1	0	.	15483000	15483400	0,6,21
ChrI	15507800	15508600	1	0	.	15507800	15508600	0,6,21
ChrI	15509200	15510200	1	0	.	15509200	15510200	0,6,21
ChrI	15513800	15516400	1	0	.	15513800	15516400	0,6,21
ChrI	15518200	15519200	1	0	.	15518200	15519200	0,6,21
ChrI	15519800	15520200	1	0	.	15519800	15520200	0,6,21
ChrI	15520600	15520800	1	0	.	15520600	15520800	0,6,21
ChrI	15522800	15523000	1	0	.	15522800	15523000	0,6,21
ChrI	15523400	15523800	1	0	.	15523400	15523800	0,6,21
ChrI	15601200	15602400	1	0	.	15601200	15602400	0,6,21
ChrI	15603800	15604200	1	0	.	15603800	15604200	0,6,21
ChrI	15604400	15605400	1	0	.	15604400	15605400	0,6,21
ChrI	15608600	15609800	1	0	.	15608600	15609800	0,6,21
ChrI	15617800	15618400	1	0	.	15617800	15618400	0,6,21
ChrI	15680800	15681600	1	0	.	15680800	15681600	0,6,21
ChrI	15684400	15684800	1	0	.	15684400	15684800	0,6,21
ChrI	15685000	15688400	1	0	.	15685000	15688400	0,6,21
ChrI	15688800	15689200	1	0	.	15688800	15689200	0,6,21
ChrI	15692400	15693400	1	0	.	15692400	15693400	0,6,21
ChrI	15693600	15694200	1	0	.	15693600	15694200	0,6,21
ChrI	15694600	15696000	1	0	.	15694600	15696000	0,6,21
ChrI	15698800	15699400	1	0	.	15698800	15699400	0,6,21
ChrI	15699800	15700800	1	0	.	15699800	15700800	0,6,21
ChrI	15703400	15705000	1	0	.	15703400	15705000	0,6,21
ChrI	15711200	15714200	1	0	.	15711200	15714200	0,6,21
ChrI	15719800	15720400	1	0	.	15719800	15720400	0,6,21
ChrI	15721000	15721400	1	0	.	15721000	15721400	0,6,21
ChrI	15899800	15900600	1	0	.	15899800	15900600	0,6,21
ChrI	15909000	15910200	1	0	.	15909000	15910200	0,6,21
ChrI	15956400	15956800	1	0	.	15956400	15956800	0,6,21
ChrI	15957400	15957800	1	0	.	15957400	15957800	0,6,21
ChrI	15977000	15977400	1	0	.	15977000	15977400	0,6,21
ChrI	16017600	16017800	1	0	.	16017600	16017800	0,6,21
ChrI	16057400	16057600	1	0	.	16057400	16057600	0,6,21
ChrI	16079800	16080200	1	0	.	16079800	16080200	0,6,21
ChrI	16080600	16081000	1	0	.	16080600	16081000	0,6,21
ChrI	16092000	16092400	1	0	.	16092000	16092400	0,6,21
ChrI	16093000	16093400	1	0	.	16093000	16093400	0,6,21
ChrI	16112800	16113400	1	0	.	16112800	16113400	0,6,21
ChrI	16130600	16131200	1	0	.	16130600	16131200	0,6,21
ChrI	16159800	16162200	1	0	.	16159800	16162200	0,6,21
ChrI	16208400	16209000	1	0	.	16208400	16209000	0,6,21
ChrI	16225400	16226200	1	0	.	16225400	16226200	0,6,21
ChrI	16272000	16272600	1	0	.	16272000	16272600	0,6,21
ChrI	16272800	16273400	1	0	.	16272800	16273400	0,6,21
ChrI	16285400	16285800	1	0	.	16285400	16285800	0,6,21
ChrI	16286200	16287000	1	0	.	16286200	16287000	0,6,21
ChrI	16301400	16306600	1	0	.	16301400	16306600	0,6,21
ChrI	16323600	16323800	1	0	.	16323600	16323800	0,6,21
ChrI	16326400	16326800	1	0	.	16326400	16326800	0,6,21
ChrI	16338000	16342200	1	0	.	16338000	16342200	0,6,21
ChrI	16347200	16348000	1	0	.	16347200	16348000	0,6,21
ChrI	16368000	16368800	1	0	.	16368000	16368800	0,6,21
ChrI	16369400	16371600	1	0	.	16369400	16371600	0,6,21
ChrI	16392200	16393200	1	0	.	16392200	16393200	0,6,21
ChrI	16406600	16407000	1	0	.	16406600	16407000	0,6,21
ChrI	16407800	16423400	1	0	.	16407800	16423400	0,6,21
ChrI	16423600	16429800	1	0	.	16423600	16429800	0,6,21
ChrI	16443400	16443800	1	0	.	16443400	16443800	0,6,21
ChrI	16457400	16457600	1	0	.	16457400	16457600	0,6,21
ChrI	16485400	16485600	1	0	.	16485400	16485600	0,6,21
ChrI	16493400	16495000	1	0	.	16493400	16495000	0,6,21
ChrI	16496400	16496800	1	0	.	16496400	16496800	0,6,21
ChrI	16497200	16497600	1	0	.	16497200	16497600	0,6,21
ChrI	16498000	16498200	1	0	.	16498000	16498200	0,6,21
ChrI	16504400	16504600	1	0	.	16504400	16504600	0,6,21
ChrI	16507000	16508000	1	0	.	16507000	16508000	0,6,21
ChrI	16649400	16649800	1	0	.	16649400	16649800	0,6,21
ChrI	16651200	16652800	1	0	.	16651200	16652800	0,6,21
ChrI	16657000	16657400	1	0	.	16657000	16657400	0,6,21
ChrI	16695400	16696600	1	0	.	16695400	16696600	0,6,21
ChrI	16697200	16699000	1	0	.	16697200	16699000	0,6,21
ChrI	16708800	16709600	1	0	.	16708800	16709600	0,6,21
ChrI	16710200	16711000	1	0	.	16710200	16711000	0,6,21
ChrI	16724000	16724600	1	0	.	16724000	16724600	0,6,21
ChrI	16764000	16765000	1	0	.	16764000	16765000	0,6,21
ChrI	16813600	16818400	1	0	.	16813600	16818400	0,6,21
ChrI	16818800	16820800	1	0	.	16818800	16820800	0,6,21
ChrI	16825400	16826200	1	0	.	16825400	16826200	0,6,21
ChrI	16829800	16831400	1	0	.	16829800	16831400	0,6,21
ChrI	16841200	16844200	1	0	.	16841200	16844200	0,6,21
ChrI	16849200	16849600	1	0	.	16849200	16849600	0,6,21
ChrI	16853000	16855000	1	0	.	16853000	16855000	0,6,21
ChrI	16857400	16857800	1	0	.	16857400	16857800	0,6,21
ChrI	16868000	16869400	1	0	.	16868000	16869400	0,6,21
ChrI	16871200	16872000	1	0	.	16871200	16872000	0,6,21
ChrI	16875000	16876800	1	0	.	16875000	16876800	0,6,21
ChrI	16893000	16893800	1	0	.	16893000	16893800	0,6,21
ChrI	16897200	16897800	1	0	.	16897200	16897800	0,6,21
ChrI	16900800	16902600	1	0	.	16900800	16902600	0,6,21
ChrI	16905200	16906200	1	0	.	16905200	16906200	0,6,21
ChrI	16907000	16908200	1	0	.	16907000	16908200	0,6,21
ChrI	16908600	16909600	1	0	.	16908600	16909600	0,6,21
ChrI	16910400	16911000	1	0	.	16910400	16911000	0,6,21
ChrI	16919200	16920600	1	0	.	16919200	16920600	0,6,21
ChrI	16921800	16925800	1	0	.	16921800	16925800	0,6,21
ChrI	16926200	16929400	1	0	.	16926200	16929400	0,6,21
ChrI	16929600	16930000	1	0	.	16929600	16930000	0,6,21
ChrI	16931000	16936200	1	0	.	16931000	16936200	0,6,21
ChrI	16939000	16939200	1	0	.	16939000	16939200	0,6,21
ChrI	16949600	16951000	1	0	.	16949600	16951000	0,6,21
ChrI	16957600	16958000	1	0	.	16957600	16958000	0,6,21
ChrI	16958400	16959000	1	0	.	16958400	16959000	0,6,21
ChrI	16963600	16964600	1	0	.	16963600	16964600	0,6,21
ChrI	16966000	16967000	1	0	.	16966000	16967000	0,6,21
ChrI	16968400	16969000	1	0	.	16968400	16969000	0,6,21
ChrI	16981600	16982600	1	0	.	16981600	16982600	0,6,21
ChrI	16989200	16990600	1	0	.	16989200	16990600	0,6,21
ChrI	16991600	16992600	1	0	.	16991600	16992600	0,6,21
ChrI	17003200	17005000	1	0	.	17003200	17005000	0,6,21
ChrI	17019800	17020400	1	0	.	17019800	17020400	0,6,21
ChrI	17049000	17049600	1	0	.	17049000	17049600	0,6,21
ChrI	17103800	17104800	1	0	.	17103800	17104800	0,6,21
ChrI	17129800	17131600	1	0	.	17129800	17131600	0,6,21
ChrI	17135400	17136200	1	0	.	17135400	17136200	0,6,21
ChrI	17148000	17149200	1	0	.	17148000	17149200	0,6,21
ChrI	17162200	17163400	1	0	.	17162200	17163400	0,6,21
ChrI	17165200	17165600	1	0	.	17165200	17165600	0,6,21
ChrI	17166400	17166800	1	0	.	17166400	17166800	0,6,21
ChrI	17182600	17183000	1	0	.	17182600	17183000	0,6,21
ChrI	17209400	17209800	1	0	.	17209400	17209800	0,6,21
ChrI	17212000	17213400	1	0	.	17212000	17213400	0,6,21
ChrI	17213800	17214600	1	0	.	17213800	17214600	0,6,21
ChrI	17246000	17246800	1	0	.	17246000	17246800	0,6,21
ChrI	17248600	17251400	1	0	.	17248600	17251400	0,6,21
ChrI	17273400	17275000	1	0	.	17273400	17275000	0,6,21
ChrI	17276600	17277400	1	0	.	17276600	17277400	0,6,21
ChrI	17278200	17278800	1	0	.	17278200	17278800	0,6,21
ChrI	17279800	17280800	1	0	.	17279800	17280800	0,6,21
ChrI	17287600	17288000	1	0	.	17287600	17288000	0,6,21
ChrI	17291600	17291800	1	0	.	17291600	17291800	0,6,21
ChrI	17292200	17292400	1	0	.	17292200	17292400	0,6,21
ChrI	17294800	17295200	1	0	.	17294800	17295200	0,6,21
ChrI	17297400	17298600	1	0	.	17297400	17298600	0,6,21
ChrI	17299000	17302400	1	0	.	17299000	17302400	0,6,21
ChrI	17303200	17304400	1	0	.	17303200	17304400	0,6,21
ChrI	17305200	17305400	1	0	.	17305200	17305400	0,6,21
ChrI	17339400	17340000	1	0	.	17339400	17340000	0,6,21
ChrI	17342600	17343000	1	0	.	17342600	17343000	0,6,21
ChrI	17354600	17356400	1	0	.	17354600	17356400	0,6,21
ChrI	17366000	17368000	1	0	.	17366000	17368000	0,6,21
ChrI	17378000	17378400	1	0	.	17378000	17378400	0,6,21
ChrI	17382800	17383600	1	0	.	17382800	17383600	0,6,21
ChrI	17407000	17407800	1	0	.	17407000	17407800	0,6,21
ChrI	17415200	17416800	1	0	.	17415200	17416800	0,6,21
ChrI	17417400	17421000	1	0	.	17417400	17421000	0,6,21
ChrI	17422800	17423000	1	0	.	17422800	17423000	0,6,21
ChrI	17435400	17435600	1	0	.	17435400	17435600	0,6,21
ChrI	17459800	17460800	1	0	.	17459800	17460800	0,6,21
ChrI	17462800	17463400	1	0	.	17462800	17463400	0,6,21
ChrI	17510000	17511400	1	0	.	17510000	17511400	0,6,21
ChrI	17511600	17512800	1	0	.	17511600	17512800	0,6,21
ChrI	17513600	17514800	1	0	.	17513600	17514800	0,6,21
ChrI	17515400	17517000	1	0	.	17515400	17517000	0,6,21
ChrI	17536200	17536400	1	0	.	17536200	17536400	0,6,21
ChrI	17548600	17548800	1	0	.	17548600	17548800	0,6,21
ChrI	17551400	17552400	1	0	.	17551400	17552400	0,6,21
ChrI	17561400	17561800	1	0	.	17561400	17561800	0,6,21
ChrI	17562600	17564200	1	0	.	17562600	17564200	0,6,21
ChrI	17564600	17565400	1	0	.	17564600	17565400	0,6,21
ChrI	17572000	17572600	1	0	.	17572000	17572600	0,6,21
ChrI	17573400	17573600	1	0	.	17573400	17573600	0,6,21
ChrI	17582000	17582400	1	0	.	17582000	17582400	0,6,21
ChrI	17584400	17584600	1	0	.	17584400	17584600	0,6,21
ChrI	17585400	17586200	1	0	.	17585400	17586200	0,6,21
ChrI	17587400	17588600	1	0	.	17587400	17588600	0,6,21
ChrI	17604800	17605200	1	0	.	17604800	17605200	0,6,21
ChrI	17606400	17610400	1	0	.	17606400	17610400	0,6,21
ChrI	17612000	17612400	1	0	.	17612000	17612400	0,6,21
ChrI	17613400	17615200	1	0	.	17613400	17615200	0,6,21
ChrI	17620400	17621200	1	0	.	17620400	17621200	0,6,21
ChrI	17622200	17623000	1	0	.	17622200	17623000	0,6,21
ChrI	17628000	17631200	1	0	.	17628000	17631200	0,6,21
ChrI	17631400	17632800	1	0	.	17631400	17632800	0,6,21
ChrI	17635400	17637000	1	0	.	17635400	17637000	0,6,21
ChrI	17637400	17639400	1	0	.	17637400	17639400	0,6,21
ChrI	17640800	17642200	1	0	.	17640800	17642200	0,6,21
ChrI	17645800	17646200	1	0	.	17645800	17646200	0,6,21
ChrI	17648000	17649400	1	0	.	17648000	17649400	0,6,21
ChrI	17668200	17669000	1	0	.	17668200	17669000	0,6,21
ChrI	17670200	17672000	1	0	.	17670200	17672000	0,6,21
ChrI	17672200	17674000	1	0	.	17672200	17674000	0,6,21
ChrI	17694600	17695800	1	0	.	17694600	17695800	0,6,21
ChrI	17696400	17696800	1	0	.	17696400	17696800	0,6,21
ChrI	17703000	17704000	1	0	.	17703000	17704000	0,6,21
ChrI	17729400	17730400	1	0	.	17729400	17730400	0,6,21
ChrI	17731400	17732200	1	0	.	17731400	17732200	0,6,21
ChrI	17777400	17778400	1	0	.	17777400	17778400	0,6,21
ChrI	17779200	17779400	1	0	.	17779200	17779400	0,6,21
ChrI	17782800	17785200	1	0	.	17782800	17785200	0,6,21
ChrI	17785800	17786800	1	0	.	17785800	17786800	0,6,21
ChrI	17787200	17788200	1	0	.	17787200	17788200	0,6,21
ChrI	17802200	17803600	1	0	.	17802200	17803600	0,6,21
ChrI	17814400	17815000	1	0	.	17814400	17815000	0,6,21
ChrI	17815800	17816600	1	0	.	17815800	17816600	0,6,21
ChrI	17826000	17827800	1	0	.	17826000	17827800	0,6,21
ChrI	17828400	17831000	1	0	.	17828400	17831000	0,6,21
ChrI	17843000	17843200	1	0	.	17843000	17843200	0,6,21
ChrI	17880400	17882000	1	0	.	17880400	17882000	0,6,21
ChrI	17958400	17958800	1	0	.	17958400	17958800	0,6,21
ChrI	17959400	17960000	1	0	.	17959400	17960000	0,6,21
ChrI	17961800	17962400	1	0	.	17961800	17962400	0,6,21
ChrI	17964800	17966600	1	0	.	17964800	17966600	0,6,21
ChrI	17967200	17972600	1	0	.	17967200	17972600	0,6,21
ChrI	17973200	17974400	1	0	.	17973200	17974400	0,6,21
ChrI	17978000	17978600	1	0	.	17978000	17978600	0,6,21
ChrI	17981000	17981400	1	0	.	17981000	17981400	0,6,21
ChrI	18057200	18057800	1	0	.	18057200	18057800	0,6,21
ChrI	18060400	18062000	1	0	.	18060400	18062000	0,6,21
ChrI	18063200	18064600	1	0	.	18063200	18064600	0,6,21
ChrI	18065000	18065400	1	0	.	18065000	18065400	0,6,21
ChrI	18074800	18077200	1	0	.	18074800	18077200	0,6,21
ChrI	18089600	18091000	1	0	.	18089600	18091000	0,6,21
ChrI	18125800	18126400	1	0	.	18125800	18126400	0,6,21
ChrI	18135400	18140400	1	0	.	18135400	18140400	0,6,21
ChrI	18171600	18172200	1	0	.	18171600	18172200	0,6,21
ChrI	18182000	18182600	1	0	.	18182000	18182600	0,6,21
ChrI	18231200	18232600	1	0	.	18231200	18232600	0,6,21
ChrI	18234600	18235000	1	0	.	18234600	18235000	0,6,21
ChrI	18240800	18241200	1	0	.	18240800	18241200	0,6,21
ChrI	18241600	18244000	1	0	.	18241600	18244000	0,6,21
ChrI	18250000	18250200	1	0	.	18250000	18250200	0,6,21
ChrI	18296000	18296400	1	0	.	18296000	18296400	0,6,21
ChrI	18297000	18300600	1	0	.	18297000	18300600	0,6,21
ChrI	18342000	18346600	1	0	.	18342000	18346600	0,6,21
ChrI	18347800	18348400	1	0	.	18347800	18348400	0,6,21
ChrI	18367800	18369600	1	0	.	18367800	18369600	0,6,21
ChrI	18383600	18387000	1	0	.	18383600	18387000	0,6,21
ChrI	18388800	18389200	1	0	.	18388800	18389200	0,6,21
ChrI	18398000	18400400	1	0	.	18398000	18400400	0,6,21
ChrI	18401600	18402000	1	0	.	18401600	18402000	0,6,21
ChrI	18437000	18438200	1	0	.	18437000	18438200	0,6,21
ChrI	18439800	18440400	1	0	.	18439800	18440400	0,6,21
ChrI	18441800	18442200	1	0	.	18441800	18442200	0,6,21
ChrI	18448200	18450000	1	0	.	18448200	18450000	0,6,21
ChrI	18465000	18465200	1	0	.	18465000	18465200	0,6,21
ChrI	18470600	18470800	1	0	.	18470600	18470800	0,6,21
ChrI	18471000	18471600	1	0	.	18471000	18471600	0,6,21
ChrI	18473800	18474600	1	0	.	18473800	18474600	0,6,21
ChrI	18485400	18485600	1	0	.	18485400	18485600	0,6,21
ChrI	18494000	18494800	1	0	.	18494000	18494800	0,6,21
ChrI	18495600	18500000	1	0	.	18495600	18500000	0,6,21
ChrI	18501000	18503800	1	0	.	18501000	18503800	0,6,21
ChrI	18504600	18505400	1	0	.	18504600	18505400	0,6,21
ChrI	18508000	18508400	1	0	.	18508000	18508400	0,6,21
ChrI	18515000	18515600	1	0	.	18515000	18515600	0,6,21
ChrI	18527800	18528800	1	0	.	18527800	18528800	0,6,21
ChrI	18566600	18567200	1	0	.	18566600	18567200	0,6,21
ChrI	18568200	18568800	1	0	.	18568200	18568800	0,6,21
ChrI	18570600	18571600	1	0	.	18570600	18571600	0,6,21
ChrI	18583400	18583600	1	0	.	18583400	18583600	0,6,21
ChrI	18612000	18612400	1	0	.	18612000	18612400	0,6,21
ChrI	18622200	18623000	1	0	.	18622200	18623000	0,6,21
ChrI	18624200	18624800	1	0	.	18624200	18624800	0,6,21
ChrI	18653800	18654400	1	0	.	18653800	18654400	0,6,21
ChrI	18665000	18667200	1	0	.	18665000	18667200	0,6,21
ChrI	18685000	18689200	1	0	.	18685000	18689200	0,6,21
ChrI	18689600	18691600	1	0	.	18689600	18691600	0,6,21
ChrI	18694000	18694200	1	0	.	18694000	18694200	0,6,21
ChrI	18700000	18701600	1	0	.	18700000	18701600	0,6,21
ChrI	18704400	18705600	1	0	.	18704400	18705600	0,6,21
ChrI	18710800	18712800	1	0	.	18710800	18712800	0,6,21
ChrI	18739000	18739200	1	0	.	18739000	18739200	0,6,21
ChrI	18769200	18769600	1	0	.	18769200	18769600	0,6,21
ChrI	18771000	18771400	1	0	.	18771000	18771400	0,6,21
ChrI	18772000	18772600	1	0	.	18772000	18772600	0,6,21
ChrI	18773200	18774000	1	0	.	18773200	18774000	0,6,21
ChrI	18782400	18784000	1	0	.	18782400	18784000	0,6,21
ChrI	18817800	18818000	1	0	.	18817800	18818000	0,6,21
ChrI	18870800	18871600	1	0	.	18870800	18871600	0,6,21
ChrI	18874000	18875200	1	0	.	18874000	18875200	0,6,21
ChrI	18881800	18882200	1	0	.	18881800	18882200	0,6,21
ChrI	18884000	18885800	1	0	.	18884000	18885800	0,6,21
ChrI	18908400	18911200	1	0	.	18908400	18911200	0,6,21
ChrI	18921000	18921200	1	0	.	18921000	18921200	0,6,21
ChrI	18943000	18944000	1	0	.	18943000	18944000	0,6,21
ChrI	18948600	18949000	1	0	.	18948600	18949000	0,6,21
ChrI	18953400	18953800	1	0	.	18953400	18953800	0,6,21
ChrI	18964600	18965400	1	0	.	18964600	18965400	0,6,21
ChrI	18995400	18996400	1	0	.	18995400	18996400	0,6,21
ChrI	18997000	18997200	1	0	.	18997000	18997200	0,6,21
ChrI	19021600	19023000	1	0	.	19021600	19023000	0,6,21
ChrI	19023600	19023800	1	0	.	19023600	19023800	0,6,21
ChrI	19024400	19025200	1	0	.	19024400	19025200	0,6,21
ChrI	19027600	19027800	1	0	.	19027600	19027800	0,6,21
ChrI	19030000	19031000	1	0	.	19030000	19031000	0,6,21
ChrI	19069600	19071800	1	0	.	19069600	19071800	0,6,21
ChrI	19091200	19092600	1	0	.	19091200	19092600	0,6,21
ChrI	19111800	19112400	1	0	.	19111800	19112400	0,6,21
ChrI	19115400	19116400	1	0	.	19115400	19116400	0,6,21
ChrI	19150600	19151800	1	0	.	19150600	19151800	0,6,21
ChrI	19154000	19154400	1	0	.	19154000	19154400	0,6,21
ChrI	19155600	19155800	1	0	.	19155600	19155800	0,6,21
ChrI	19163400	19164000	1	0	.	19163400	19164000	0,6,21
ChrI	19166800	19168400	1	0	.	19166800	19168400	0,6,21
ChrI	19172200	19172600	1	0	.	19172200	19172600	0,6,21
ChrI	19198000	19198800	1	0	.	19198000	19198800	0,6,21
ChrI	19206200	19209000	1	0	.	19206200	19209000	0,6,21
ChrI	19247000	19248000	1	0	.	19247000	19248000	0,6,21
ChrI	19248600	19249600	1	0	.	19248600	19249600	0,6,21
ChrI	19250400	19251000	1	0	.	19250400	19251000	0,6,21
ChrI	19290400	19291000	1	0	.	19290400	19291000	0,6,21
ChrI	19291800	19292000	1	0	.	19291800	19292000	0,6,21
ChrI	19292200	19292400	1	0	.	19292200	19292400	0,6,21
ChrI	19292800	19293600	1	0	.	19292800	19293600	0,6,21
ChrI	19304400	19306600	1	0	.	19304400	19306600	0,6,21
ChrI	19314200	19314800	1	0	.	19314200	19314800	0,6,21
ChrI	19316000	19317800	1	0	.	19316000	19317800	0,6,21
ChrI	19324600	19326200	1	0	.	19324600	19326200	0,6,21
ChrI	19326600	19328000	1	0	.	19326600	19328000	0,6,21
ChrI	19329800	19332600	1	0	.	19329800	19332600	0,6,21
ChrI	19352000	19352800	1	0	.	19352000	19352800	0,6,21
ChrI	19358400	19359800	1	0	.	19358400	19359800	0,6,21
ChrI	19385800	19386600	1	0	.	19385800	19386600	0,6,21
ChrI	19387800	19388600	1	0	.	19387800	19388600	0,6,21
ChrI	19405200	19405400	1	0	.	19405200	19405400	0,6,21
ChrI	19431800	19434800	1	0	.	19431800	19434800	0,6,21
ChrI	19456600	19457200	1	0	.	19456600	19457200	0,6,21
ChrI	19462600	19464200	1	0	.	19462600	19464200	0,6,21
ChrI	19466600	19467200	1	0	.	19466600	19467200	0,6,21
ChrI	19468400	19469000	1	0	.	19468400	19469000	0,6,21
ChrI	19471000	19471800	1	0	.	19471000	19471800	0,6,21
ChrI	19487000	19488000	1	0	.	19487000	19488000	0,6,21
ChrI	19491200	19491600	1	0	.	19491200	19491600	0,6,21
ChrI	19492200	19492400	1	0	.	19492200	19492400	0,6,21
ChrI	19499600	19499800	1	0	.	19499600	19499800	0,6,21
ChrI	19501400	19502200	1	0	.	19501400	19502200	0,6,21
ChrI	19531600	19532000	1	0	.	19531600	19532000	0,6,21
ChrI	19536800	19537800	1	0	.	19536800	19537800	0,6,21
ChrI	19548000	19548400	1	0	.	19548000	19548400	0,6,21
ChrI	19551400	19552000	1	0	.	19551400	19552000	0,6,21
ChrI	19569000	19569600	1	0	.	19569000	19569600	0,6,21
ChrI	19581400	19583000	1	0	.	19581400	19583000	0,6,21
ChrI	19584200	19585200	1	0	.	19584200	19585200	0,6,21
ChrI	19585400	19589800	1	0	.	19585400	19589800	0,6,21
ChrI	19590400	19596000	1	0	.	19590400	19596000	0,6,21
ChrI	19611000	19611600	1	0	.	19611000	19611600	0,6,21
ChrI	19619200	19620200	1	0	.	19619200	19620200	0,6,21
ChrI	19623000	19623800	1	0	.	19623000	19623800	0,6,21
ChrI	19635400	19635800	1	0	.	19635400	19635800	0,6,21
ChrI	19655200	19656200	1	0	.	19655200	19656200	0,6,21
ChrI	19680000	19681400	1	0	.	19680000	19681400	0,6,21
ChrI	19686600	19690000	1	0	.	19686600	19690000	0,6,21
ChrI	19691400	19692400	1	0	.	19691400	19692400	0,6,21
ChrI	19697800	19698200	1	0	.	19697800	19698200	0,6,21
ChrI	19699000	19699800	1	0	.	19699000	19699800	0,6,21
ChrI	19751000	19751600	1	0	.	19751000	19751600	0,6,21
ChrI	19752000	19754800	1	0	.	19752000	19754800	0,6,21
ChrI	19757200	19758400	1	0	.	19757200	19758400	0,6,21
ChrI	19769600	19770000	1	0	.	19769600	19770000	0,6,21
ChrI	19770800	19771600	1	0	.	19770800	19771600	0,6,21
ChrI	19779200	19781000	1	0	.	19779200	19781000	0,6,21
ChrI	19781800	19786600	1	0	.	19781800	19786600	0,6,21
ChrI	19790200	19792200	1	0	.	19790200	19792200	0,6,21
ChrI	19793600	19794200	1	0	.	19793600	19794200	0,6,21
ChrI	19805400	19807200	1	0	.	19805400	19807200	0,6,21
ChrI	19813600	19813800	1	0	.	19813600	19813800	0,6,21
ChrI	19814800	19816400	1	0	.	19814800	19816400	0,6,21
ChrI	19817200	19820000	1	0	.	19817200	19820000	0,6,21
ChrI	19832600	19833800	1	0	.	19832600	19833800	0,6,21
ChrI	19834400	19835000	1	0	.	19834400	19835000	0,6,21
ChrI	19841600	19844400	1	0	.	19841600	19844400	0,6,21
[truncated: 70,069 more rows]
