# Supplementary material for: Young genes have distinct gene structure, epigenetic profiles, and transcriptional regulation
Source: HighWire-hosted journal article supplement (doi:10.1101/gr.234872.118), 2018-09-19
Supplement: SupplementalTable3_Primers_and_Abs.xlsx [file SupplementalTable3_Primers_and_Abs.xlsx]

## Sheet: Legend
SupplementalTable3: Primers and antibodies used. Primers used for ChIP-qPCR validation and antibodies used for ChIP are present as separate tabs/worksheets.

## Sheet: qPCR primers
qPCR primers	Sequence
heterochromatin F	TAGCCCTCGTCTCGTGCTCC
heterochromatin R	ATTTGGCGGCGTGAGTTGC
euchromatin/gpd-3 promoter F	ACGTTTCTCACCGCGTGC
euchromatin/gpd-3promoter R	ACCCGCGCTTCAATGATCC
18S F	CCCACTCTCAATTCGAGGAGG
18S R	CTTGCCCTCCCATAGACTTCG
28S F	TGTACGTTTCGTGCGTCTGG
28S R	CCTACGCCCTAAGCCTTCGA

## Sheet: Antibodies
Antibody	cat #	company	DynaBead protein-conjugate used
H3K4me3	C15200152	Diagenode	G
H3K27me3	C15410069	Diagenode	A
H3K27ac	C15410174	Diagenode	A
H3K9me3	C15410056	Diagenode	A
H3K9ac	C15200185	Diagenode	G
H2Bub	ab39623	Active Motif	G
H3K79me2/3	ab3594	abcam	A
H3K36me3	C15200183	Diagenode	G
H3K4me1	C15410194 (rep1), C15200150 (rep2)	Diagenode	A
H4K20me1	ab9051	abacam	A
H2A.Z	C15410201	Diagenode	A
